# Supplementary material for: A ChIP-exo screen of 887 Protein Capture Reagents Program transcription factor antibodies in human cells
Source: HighWire-hosted journal article supplement (doi:10.1101/gr.275472.121), 2021-08-23
Supplement: Supplemental_Table_S1.xlsx [file Supplemental_Table_S1.xlsx]

## Sheet: Table1
Table 1		Total Clones Tested	943	Passing threshold in at least 1 assay	50	0.0530223
				'1' or '2' in at least 1 assay	371	0.393425
	1: passing threshold, 2: inconclusive, 3: no evidence
Target	ChIP-exo:RATING	ChIP-seq:RATING	MOTIFENRICH:RATING	PBM:RATING	WESTERN: RATING	Expression (avg FPKM)	K562	MCF7	HepG2
NRF1-'3H1	1	1	1	1	1		17.895	9.825	6.285
ESR1-'1A12	1	NaN	1	1	1		0	53.62	0
NRF1-'3D4	3	1	1	1	1		17.895	9.825	6.285
USF1-'1B8	1	NaN	1	1	1		32.875	20.76	20.32
YY1-'1B2	1	NaN	1	1	1		27.435	58.11	15.97
ZNF143-'1A10	1	NaN	1	1	1		34.97	11.965	21.805
HNF4A-'2A8	1	NaN	1	1	3		0.015	0.015	58.565
HSF1-'1A10	1	1	1	NaN	NaN		27.005	27.31	21.885
HSF1-'1A8	1	1	1	NaN	NaN		27.005	27.31	21.885
CEBPB-'3D10	2	NaN	3	1	1		5.745	5.44	21.59
RUNX2-'1B7	2	NaN	3	1	1		0.185	3.325	0
RUNX2-'1B9	2	NaN	3	1	1		0.185	3.325	0
SMAD2-'1B10	2	2	2	NaN	1		27.32	34	22.65
ZNF200-'1A3	2	NaN	3	1	1		3.465	5.24	2.25
CEBPB-'2A12	3	NaN	3	1	1		5.745	5.44	21.59
FOXR1-'1F8	3	NaN	3	1	1		0	0	0
GABPA-'2G3	1	NaN	1	NaN	NaN		19.04	11.1	4.26
GATA4-'1A7	2	NaN	2	1	3		0.02	0.045	12.105
GRHL2-'1A6	1	NaN	1	NaN	NaN		0	46.375	0
HESX1-'1A11	3	NaN	3	1	1		0.41	1.035	0.47
HSF1-'1A9	NaN	1	1	NaN	NaN		27.005	27.31	21.885
NFIA-'2C6	1	NaN	1	NaN	NaN		6.57	2.1	8.68
NKX2-5-'1E6	NaN	NaN	3	1	1		0	0.01	0.34
POU5F1-'1A4	NaN	NaN	3	1	1		0	0.09	2.62
POU5F1-'1D2	3	NaN	3	1	1		0	0.09	2.62
STAT5A-'1A11	1	NaN	1	NaN	NaN		99.875	0.615	0.82
TEAD4-'1G7	3	1	1	NaN	NaN		11.815	8.505	40.87
TEAD4-'2F4	2	1	2	NaN	NaN		11.815	8.505	40.87
USF2-'1A11	1	NaN	1	NaN	NaN		40.44	46.32	61.225
VENTX-'2A9	3	NaN	3	1	1		0.07	0	0
BACH1-'1A2	3	1	2	NaN	NaN		22.88	7.175	8.8
FOS-'1A7	2	2	2	NaN	NaN		2.825	48.87	12.815
FOXM1-'1H4	2	NaN	3	3	1		7.59	35.995	9.11
FOXM1-'2E6	2	NaN	3	3	1		7.59	35.995	9.11
HLF-'1C5	2	NaN	1	NaN	NaN		0.045	0.64	211.32
MEIS2-'1A11	2	NaN	1	NaN	NaN		11.235	9.33	6.06
NKX2-5-'3F2	2	NaN	3	3	1		0	0.01	0.34
SMARCC2-'1A3	2	2	2	NaN	NaN		34.09	63.88	14.015
STAT3-'2F12	1	NaN	2	NaN	NaN		64.78	21.245	38.83
ATAD2-'2E5	2	NaN	2	NaN	NaN		33.66	73.675	18.86
BACH1-'2G3	2	2	3	NaN	NaN		22.88	7.175	8.8
BCL6-'1D3	1	NaN	3	NaN	NaN		3.785	7.25	37.06
DCP2-'1D6	2	3	2	NaN	NaN		19.385	18.16	8.42
DDIT3-'1D10	2	NaN	2	NaN	NaN		68.57	13.895	29.37
ELK1-'1D9	2	NaN	2	NaN	NaN		17.195	9.425	2.76
FOXI1-'1F8	3	NaN	3	3	1		0	0.66	0
FOXN1-'2B8	3	NaN	3	3	1		0	0.155	0.01
HMGB1-'4F10	2	NaN	2	NaN	NaN		238.37	645.295	56.795
KLF16-'2E5	2	NaN	2	NaN	NaN		2.635	1.3	2.465
MEF2D-'3A4	2	NaN	2	NaN	NaN		2.115	3.405	2.65
MEN1-'2B1	NaN	2	2	NaN	NaN		16.725	14.395	17.685
MXD3-'2B4	2	NaN	2	NaN	NaN		NaN	NaN	NaN
MYCL-'1A3	NaN	NaN	3	NaN	1		8.04	2.195	1.12
MYCL-'2D5	NaN	NaN	3	NaN	1		8.04	2.195	1.12
MYCN-'2C7	3	NaN	3	NaN	1		0	0.37	0
NKX2-5-'3B4	NaN	NaN	3	3	1		0	0.01	0.34
NMI-'1C1	2	NaN	2	NaN	NaN		9.505	5.965	0.32
PAX3-'1B3	3	NaN	3	1	3		0	0.005	0.015
PBX1-'2D10	NaN	NaN	3	NaN	1		0.155	14.86	0.07
PBX4-'1C11	3	NaN	3	NaN	1		1.78	3.89	0
POU5F1-'1D9	3	NaN	3	3	1		0	0.09	2.62
PPARA-'2B9	2	NaN	2	NaN	NaN		4.095	1.2	10.665
PPP1R10-'1G12	2	NaN	2	NaN	NaN		14.635	23.66	15.445
PRDM4-'2B3	3	2	2	NaN	NaN		12.12	31.53	5.96
PRDM4-'2B4	NaN	2	2	NaN	NaN		12.12	31.53	5.96
PRDM4-'2D1	3	1	3	NaN	NaN		12.12	31.53	5.96
SIRT2-'1A2	2	NaN	2	NaN	NaN		19.445	15.375	17.785
SIX5-'2H4	2	NaN	2	NaN	NaN		2.705	3.41	5.065
SMARCC1-'1F1	3	2	2	NaN	NaN		39.685	34.465	26.215
TCEAL8-'1C4	2	3	2	NaN	NaN		39.105	1.885	9.925
THAP5-'2D4	2	NaN	2	NaN	NaN		9.285	14.17	2.31
WHSC1-'2A1	3	2	2	NaN	NaN		33.05	48.44	12.64
YY1-'1A5	1	NaN	3	NaN	NaN		27.435	58.11	15.97
ZKSCAN1-'1F10	2	NaN	2	NaN	NaN		19.41	27.185	28.59
ZNF212-'1A3	2	NaN	2	NaN	NaN		6.375	6.125	1.745
ZNF550-'1B4	2	NaN	2	NaN	NaN		7.56	4.485	6.405
ZZZ3-'1B11	2	NaN	2	NaN	NaN		19.625	17.91	10.165
ANKZF1-'1C6	2	NaN	3	NaN	NaN		41.345	32.625	77.6
ARNT2-'1A3	2	NaN	3	NaN	NaN		0.005	9.725	0.895
ARNTL-'1C12	2	NaN	3	NaN	NaN		0.26	7.14	2.365
ATF2-'1B4	2	NaN	3	NaN	NaN		68.935	18.37	50.15
ATRX-'1E4	2	NaN	3	NaN	NaN		11.255	33.73	15.38
BATF-'1E10	2	NaN	3	NaN	NaN		0.115	15.845	0.38
BATF2-'2B9	2	NaN	3	NaN	NaN		5	0.03	1.76
BATF3-'1H3	2	NaN	3	NaN	NaN		0.885	0.035	0.165
BBX-'2F6	2	NaN	3	NaN	NaN		6.885	14.515	13.99
BCL6-'1B1	2	NaN	3	NaN	NaN		3.785	7.25	37.06
BHLHA9-'1D1	2	NaN	3	NaN	NaN		0	0	0
BRD1-'1B5	2	3	3	NaN	NaN		1.52	5.225	3.48
BRD1-'2H2	2	3	3	NaN	NaN		1.52	5.225	3.48
BRPF1-'1E2	2	3	3	NaN	NaN		9.03	10.595	4.455
BRWD1-'1E12	2	3	3	NaN	NaN		20.57	31.815	7.665
BSX-'4D10	2	NaN	3	NaN	NaN		0	0	0
CASP8AP2-'1D6	2	NaN	3	NaN	NaN		12.17	12.525	2.695
CBX5-'2A7	2	3	3	NaN	NaN		56.365	71.44	8.415
CC2D1A-'1C2	2	NaN	3	NaN	NaN		11.075	16.985	8.565
CEBPE-'1B2	2	NaN	3	NaN	NaN		0.04	0	0.055
CIZ1-'1A2	2	3	3	NaN	NaN		77.42	76.64	32
CREB3L4-'1E4	2	NaN	3	NaN	NaN		13.03	20.06	10.965
CREB5-'1G8	2	NaN	3	NaN	NaN		0.215	0.065	0.915
CSTF2T-'1A3	2	NaN	3	NaN	NaN		9.04	6.29	0.985
CTBP1-'1A1	2	NaN	3	NaN	NaN		43.21	37.675	60.9
DAXX-'6E9	2	NaN	3	NaN	NaN		17.085	32.22	13
DDIT3-'1A10	2	NaN	3	NaN	NaN		68.57	13.895	29.37
DDX41-'1B4	2	NaN	3	NaN	NaN		87.885	86.64	62.08
DDX43-'1E7	2	NaN	3	NaN	NaN		0.025	8.47	0
DGCR8-'1A1	2	NaN	3	NaN	NaN		73.555	24.7	7.71
DIS3-'1A7	2	NaN	3	NaN	NaN		22.035	18.315	7.18
DMRTB1-'1B3	2	NaN	3	NaN	NaN		0.01	0	0
DMTF1-'1B7	2	NaN	3	NaN	NaN		126.885	92.72	74.08
DNMT3A-'1E2	2	3	3	NaN	NaN		2.89	9.72	9.47
DPF1-'1B6	2	3	3	NaN	NaN		2.065	1.35	0.705
DRAP1-'1A12	2	NaN	3	NaN	NaN		22.36	60.465	27.72
E4F1-'2D1	2	NaN	3	NaN	NaN		16.215	7.13	9.415
EBF1-'1B1	2	NaN	3	NaN	NaN		0.04	0	0
EHMT2-'3D9	2	NaN	3	NaN	NaN		24.33	24.215	32.295
ELF1-'1A3	2	NaN	3	NaN	NaN		22.205	53.935	16.12
ERG-'2C6	2	NaN	3	NaN	NaN		0.005	0.88	0.005
ESRP2-'1D2	2	NaN	3	NaN	NaN		0.035	59.475	20.815
ESRRG-'3A6	2	NaN	3	NaN	NaN		NaN	NaN	NaN
ETS1-'1C8	2	NaN	3	NaN	NaN		0.045	0	0.14
ETV6-'1A7	2	NaN	3	NaN	NaN		2.165	2.68	1.89
ETV7-'1A1	2	NaN	3	NaN	NaN		0.02	0.085	0
FOSL1-'1E3	2	NaN	3	NaN	NaN		4.44	1.105	2.095
FOSL2-'1B1	2	NaN	3	NaN	NaN		0.275	24.845	11.595
FOXC2-'1B1	2	NaN	3	NaN	NaN		NaN	NaN	NaN
FOXP4-'1D1	2	NaN	3	NaN	NaN		1.275	3.16	8.605
GLI1-'1A1	2	NaN	3	NaN	NaN		0.465	0.08	0.115
GLI1-'1E6	2	NaN	3	NaN	NaN		0.465	0.08	0.115
GMEB1-'1C1	2	NaN	3	NaN	NaN		4.61	5.265	1.635
GRAMD4-'1A6	2	NaN	3	NaN	NaN		20.61	4.475	9.6
GRHL1-'1B6	2	NaN	3	NaN	NaN		3.875	16.67	6.905
GTF2A1-'1F2	2	NaN	3	NaN	NaN		14.01	15.56	10.245
GTF2F2-'1B3	2	3	3	NaN	NaN		13.735	16.785	5.795
GTF2H2C-'2C9	2	3	3	NaN	NaN		42.265	22.66	16.5
HAND1-'1D5	2	NaN	3	NaN	NaN		0	0	0
HAND1-'2A9	2	NaN	3	NaN	NaN		0	0	0
HAND2-'1C6	2	NaN	3	NaN	NaN		NaN	NaN	NaN
HDAC6-'1A4	2	NaN	3	NaN	NaN		67.73	23.44	61.17
HDAC7-'1C4	2	NaN	3	NaN	NaN		20	11.3	6.03
HDGF-'1D1	2	NaN	3	NaN	NaN		163.33	177.07	86.3
HDGF-'1F2	2	NaN	3	NaN	NaN		163.33	177.07	86.3
HMG20B-'1B5	2	3	3	NaN	NaN		31.365	24.645	14.775
HMGA1-'1C3	2	NaN	3	NaN	NaN		203.84	14.03	68.835
HMGN5-'2E6	2	NaN	3	NaN	NaN		5.225	2.965	0.23
HMX3-'4E5	2	NaN	3	NaN	NaN		1.23	0.01	0
HOMEZ-'1B5	2	NaN	3	NaN	NaN		19.12	8.99	20.27
HOPX-'1A1	2	NaN	3	NaN	NaN		0	0.01	0
HOXB2-'1C9	2	NaN	3	NaN	NaN		9.94	0.245	0
HOXB2-'1F2	2	NaN	3	NaN	NaN		9.94	0.245	0
HOXB6-'1A4	2	NaN	3	NaN	NaN		1.63	0.51	0
HOXB9-'1E6	2	NaN	3	NaN	NaN		NaN	NaN	NaN
HOXC8-'1D3	2	NaN	3	NaN	NaN		0.35	0.87	0.015
HSF1-'1A6	NaN	2	3	NaN	NaN		27.005	27.31	21.885
HSF1-'1D11	2	3	3	NaN	NaN		27.005	27.31	21.885
HSF5-'1A1	2	NaN	3	NaN	NaN		0	0.015	0
ID1-'1E5	2	NaN	3	NaN	NaN		59.34	35.67	175.51
ID2-'1A8	2	NaN	3	NaN	NaN		13.915	47.88	404.485
ID3-'2C8	2	NaN	3	NaN	NaN		26.845	22.265	30.25
ID3-'2H2	2	NaN	3	NaN	NaN		26.845	22.265	30.25
ID4-'1B8	2	NaN	3	NaN	NaN		0	3.18	0.075
IKZF1-'1B8	2	NaN	3	NaN	NaN		NaN	NaN	NaN
ING1-'1C2	2	NaN	3	NaN	NaN		5.94	4.775	9.02
ING4-'3B3	2	NaN	3	NaN	NaN		19.145	34.7	20.285
IRF4-'1A5	2	NaN	3	NaN	NaN		0.01	0.005	0.04
IRF9-'2B7	2	NaN	3	NaN	NaN		10.05	11.255	33.435
IRX5-'1B4	2	NaN	3	NaN	NaN		0.485	3.77	0
ISL1-'1C2	2	NaN	3	NaN	NaN		0	1.09	0
JAZF1-'1C2	NaN	3	2	NaN	NaN		0.055	1.29	0
JUNB-'3G11	2	NaN	3	NaN	NaN		NaN	NaN	NaN
KDM1A-'1A10	2	3	3	NaN	NaN		149.18	71.965	66.05
KIAA1967-'1D10	2	NaN	3	NaN	NaN		103.005	84.6	84.2
KLF1-'2C4	2	NaN	3	3	3		32.07	0.005	0
KLF12-'1E3	2	NaN	3	NaN	NaN		0.06	1.655	0.775
KLF15-'1H1	2	NaN	3	NaN	NaN		1.095	0.045	3.76
KLF7-'1C11	2	NaN	3	NaN	NaN		0.25	11.465	3.74
LCOR-'1B1	2	NaN	3	NaN	NaN		9.24	10.225	9.455
LCORL-'1H11	2	NaN	3	NaN	NaN		10.675	4.885	2.88
LEUTX-'1B6	2	NaN	3	NaN	NaN		0	0	0
LEUTX-'1B8	2	NaN	3	NaN	NaN		0	0	0
MAFG-'1H7	2	NaN	3	NaN	NaN		16.75	6.875	12.125
MAT2B-'4B6	2	NaN	3	NaN	NaN		NaN	NaN	NaN
MBD2-'1B6	2	NaN	3	NaN	NaN		NaN	NaN	NaN
MED1-'1A11	2	3	3	NaN	NaN		27.75	13.135	22.9
MEF2A-'1B7	2	NaN	3	NaN	NaN		5.695	15.74	14.14
MEF2A-'1F7	2	NaN	3	NaN	NaN		5.695	15.74	14.14
MEF2B-'2F9	2	NaN	3	NaN	NaN		0.125	0.37	1.205
MEIS2-'2B4	2	NaN	3	NaN	NaN		11.235	9.33	6.06
MEIS3-'1A10	2	NaN	3	NaN	NaN		0.32	11.19	0.5
MEN1-'1H6	2	3	3	NaN	NaN		16.725	14.395	17.685
MLLT3-'2B6	2	3	3	NaN	NaN		0.17	10	6.97
MLX-'1G8	2	NaN	3	NaN	NaN		30.735	20.425	48.49
MLXIP-'1A10	2	NaN	3	NaN	NaN		10.85	9.955	3.995
MXD4-'2B6	2	NaN	3	NaN	NaN		7.27	8.155	19.595
MYCL1-'2D5	2	NaN	3	NaN	NaN		NaN	NaN	NaN
MYCL1-'2E1	2	NaN	3	NaN	NaN		NaN	NaN	NaN
MYO1B-'2B4	2	NaN	3	NaN	NaN		NaN	NaN	NaN
MZF1-'1E8	2	NaN	3	NaN	NaN		13.13	9.645	5.5
NAB2-'2G1	2	NaN	3	NaN	NaN		17.38	12.515	9.245
NACC1-'1A1	2	NaN	3	NaN	NaN		23.535	30.91	30.24
NACC1-'1A8	2	NaN	3	NaN	NaN		23.535	30.91	30.24
NCOA1-'1E8	2	NaN	3	NaN	NaN		14.68	19.105	6.835
NFE2L2-'1D12	2	3	3	NaN	NaN		65.3	57.82	106.735
NFIA-'1B8	2	NaN	3	NaN	NaN		6.57	2.1	8.68
NFIX-'3B4	2	NaN	3	NaN	NaN		2.63	0.77	1.945
NFKB2-'1E1	2	NaN	3	NaN	NaN		5.42	8.545	8.495
NFX1-'1A4	2	NaN	3	NaN	NaN		23.15	25.43	14.36
NFYB-'1A2	2	NaN	3	NaN	NaN		20.86	49.085	10.19
NFYC-'1A11	2	NaN	3	NaN	NaN		34.865	20.425	43.485
NKX3-1-'1E5	2	NaN	3	NaN	NaN		0.025	0.56	0.905
NPM3-'1D5	2	NaN	3	NaN	NaN		57.16	21.9	29.86
NR2C1-'2C3	2	NaN	3	NaN	NaN		27.56	19.335	37.885
NR2F1-'1D5	2	NaN	3	NaN	NaN		NaN	NaN	NaN
NR2F2-'1G3	2	NaN	3	NaN	NaN		NaN	NaN	NaN
NR3C2-'1A3	2	NaN	3	NaN	NaN		0.13	0.175	0.14
ONECUT2-'1A1	2	NaN	3	NaN	NaN		0.525	0.69	2.1
PAX2-'1A7	2	NaN	3	NaN	NaN		0	0.025	0
PBX1-'3C8	2	NaN	3	NaN	NaN		0.155	14.86	0.07
PCGF3-'1D5	2	3	3	NaN	NaN		27.355	29.02	51.705
PHF19-'2B8	2	NaN	3	NaN	NaN		244.985	40.775	16.425
PKNOX2-'3C6	2	NaN	3	NaN	NaN		0	0.04	0
PLAG1-'1F5	2	NaN	3	NaN	NaN		2.915	0.145	4.825
PLXNB1-'3A7	2	NaN	3	NaN	NaN		7.055	43.6	97.805
POLE3-'3D3	2	NaN	3	NaN	NaN		85.28	180.07	18.825
PPP1R10-'1A2	2	NaN	3	NaN	NaN		14.635	23.66	15.445
PRDM1-'2B9	2	3	3	NaN	NaN		0.115	0.315	0.045
PRDM16-'1B9	2	NaN	3	NaN	NaN		NaN	NaN	NaN
PRKRA-'3A4	2	NaN	3	NaN	NaN		41.265	34.155	30.52
PRMT6-'2C9	2	NaN	3	NaN	NaN		11.525	110.42	4.98
PRMT7-'1A4	2	NaN	3	NaN	NaN		44.36	18.885	30.43
PROX1-'1A6	2	NaN	3	NaN	NaN		0.04	0	6.795
PROX2-'1E1	2	NaN	3	NaN	NaN		0	0	0
PROX2-'1F5	2	NaN	3	NaN	NaN		0	0	0
PRRX2-'1G11	2	NaN	3	NaN	NaN		0.01	0.36	0.015
PUM2-'1B11	2	NaN	3	NaN	NaN		NaN	NaN	NaN
RARB-'1E7	2	NaN	3	NaN	NaN		0.385	0.05	0.055
RBBP5-'1C3	2	NaN	3	NaN	NaN		NaN	NaN	NaN
RBMS2-'1B2	2	NaN	3	NaN	NaN		0.85	4.3	4.155
RCOR2-'3F4	2	3	3	NaN	NaN		1.835	0.42	5.26
RELA-'1E3	2	NaN	3	NaN	NaN		14.835	24.065	27.79
RELA-'2B6	2	NaN	3	NaN	NaN		14.835	24.065	27.79
RFX2-'1A11	2	NaN	3	NaN	NaN		5.735	2.225	1.75
RFX3-'1D11	2	NaN	3	NaN	NaN		2.935	1.995	3.05
RFX6-'3D3	2	NaN	3	NaN	NaN		0	0.025	0.015
RFXANK-'1A9	2	NaN	3	NaN	NaN		NaN	NaN	NaN
RGCC-'2C4	2	NaN	3	NaN	NaN		NaN	NaN	NaN
RHOXF2-'1D7	2	NaN	3	NaN	NaN		127.315	0	0
RNF2-'1D4	2	NaN	3	NaN	NaN		NaN	NaN	NaN
RPS6KA5-'1F10	2	NaN	3	NaN	NaN		2.69	4.38	0.295
RXRB-'2B6	2	NaN	3	NaN	NaN		NaN	NaN	NaN
RXRG-'5C9	2	NaN	3	NaN	NaN		0	0.11	0
RXRG-'5G6	2	NaN	3	NaN	NaN		0	0.11	0
SAMD4B-'1H3	2	NaN	3	NaN	NaN		23.425	27.945	21.13
SCAND1-'3D11	2	NaN	3	NaN	NaN		4.1	3.325	13.6
SCML2-'1D12	2	NaN	3	NaN	NaN		NaN	NaN	NaN
SFMBT2-'1B7	2	NaN	3	NaN	NaN		5.665	2.025	0.01
SHARPIN-'1A5	2	NaN	3	NaN	NaN		15.26	12.87	24.75
SHARPIN-'1A8	2	NaN	3	NaN	NaN		15.26	12.87	24.75
SIRT2-'1A8	2	NaN	3	NaN	NaN		19.445	15.375	17.785
SKIL-'1D1	2	3	3	NaN	NaN		3.79	36.19	3.19
SMAD3-'1A2	2	NaN	3	NaN	NaN		11.535	44.325	36.22
SMAD4-'1H2	2	3	3	NaN	NaN		38.35	27.535	37.565
SMAD7-'1D7	2	NaN	3	NaN	NaN		1.015	5.565	9.695
SMAD9-'2F4	2	NaN	3	NaN	NaN		0.02	0.365	4.15
SMARCAL1-'1G2	2	3	3	NaN	NaN		17.695	9.385	12.985
SMARCD1-'2B3	2	3	3	NaN	NaN		36.595	49.685	32.395
SMARCD1-'2B5	2	3	3	NaN	NaN		36.595	49.685	32.395
SNW1-'1C12	2	NaN	3	NaN	NaN		32.09	52.455	13.105
SOX4-'3F12	2	NaN	3	NaN	NaN		0.005	28.355	1.525
SRF-'1F7	2	NaN	3	NaN	NaN		NaN	NaN	NaN
SRRT-'1F5	2	NaN	3	NaN	NaN		31.81	73.99	16.595
STAT1-'4H11	2	NaN	3	NaN	NaN		14.985	47.375	12.795
STAT5B-'3E9	2	NaN	3	NaN	NaN		100.71	13.83	26.78
SYAP1-'2B8	2	NaN	3	NaN	NaN		NaN	NaN	NaN
T-'1A2	2	NaN	3	NaN	NaN		0	0	0
T-'1A5	2	NaN	3	NaN	NaN		0	0	0
TADA2A-'3C4	2	NaN	3	NaN	NaN		NaN	NaN	NaN
TAF10-'1A2	2	NaN	3	NaN	NaN		NaN	NaN	NaN
TAX1BP1-'1D4	2	NaN	3	NaN	NaN		71.57	46.86	53.305
TBX19-'2A12	2	NaN	3	NaN	NaN		1.99	1.305	0.825
TCF25-'1F12	2	NaN	3	NaN	NaN		63.935	135.765	144.455
TFAP2A-'2C2	2	NaN	3	NaN	NaN		0.095	1.96	0
TFCP2-'3B1	2	NaN	3	NaN	NaN		18.275	0.005	4.055
TGIF1-'2G6	2	NaN	3	NaN	NaN		34.33	50.385	46.105
THAP10-'3A9	2	NaN	3	NaN	NaN		0.015	4.89	0.35
THAP4-'1A7	2	NaN	3	NaN	NaN		18.17	21.41	39.365
THAP7-'3H4	2	NaN	3	NaN	NaN		52.575	7.295	9.02
THAP9-'2B3	2	NaN	3	NaN	NaN		3.93	2.065	3.27
TP73-'1A8	2	NaN	3	NaN	NaN		0.55	1.345	0.33
TRIM27-'1B3	2	NaN	3	NaN	NaN		135.095	23.26	66.335
TSC22D3-'1G10	2	NaN	3	NaN	NaN		NaN	NaN	NaN
UBE2B-'1C7	2	NaN	3	NaN	NaN		45.05	78.45	27.22
USP16-'1B2	2	NaN	3	NaN	NaN		25.485	20.505	8.645
WDHD1-'1B10	2	NaN	3	NaN	NaN		19.84	18.84	2.76
WDR5-'1F5	2	NaN	3	NaN	NaN		22.23	55.48	22.635
WHSC1-'2A11	2	3	3	NaN	NaN		33.05	48.44	12.64
YBX1-'1A8	2	NaN	3	NaN	NaN		375.895	297.49	171.985
YBX2-'1C2	2	NaN	3	NaN	NaN		0	5.265	0.075
YY1-'1C2	2	NaN	3	NaN	NaN		27.435	58.11	15.97
YY2-'1A8	2	NaN	3	NaN	NaN		0.695	1.73	0.24
ZBTB14-'1B12	2	NaN	3	NaN	NaN		NaN	NaN	NaN
ZBTB17-'1D3	2	NaN	3	NaN	NaN		NaN	NaN	NaN
ZBTB18-'1B2	2	NaN	3	NaN	NaN		1.59	0.535	2.66
ZBTB2-'46F2	2	NaN	3	NaN	NaN		9.15	16.46	9.085
ZBTB25-'1D12	2	NaN	3	NaN	NaN		2.925	7.28	4.645
ZBTB32-'2A7	2	NaN	3	NaN	NaN		NaN	NaN	NaN
ZBTB48-'3C4	2	NaN	3	NaN	NaN		NaN	NaN	NaN
ZBTB7B-'1F7	2	NaN	3	NaN	NaN		11.77	12.15	12.135
ZBTB7C-'2B11	2	NaN	3	NaN	NaN		0	0.165	0.005
ZC3H7A-'2G9	2	NaN	3	NaN	NaN		19.03	57.32	19.61
ZEB2-'2A11	2	NaN	3	NaN	NaN		48.61	0.03	0.05
ZFAT-'2D2	2	NaN	3	NaN	NaN		1.085	5.155	0.965
ZFP28-'2B8	2	NaN	3	NaN	NaN		0.005	0	0
ZFP3-'1A5	2	NaN	3	NaN	NaN		0	3.6	0
ZIC2-'2A2	2	NaN	3	NaN	NaN		1.23	1.475	0.075
ZKSCAN2-'1G10	2	NaN	3	NaN	NaN		2.1	2.445	2.57
ZKSCAN2-'2C6	2	NaN	3	NaN	NaN		2.1	2.445	2.57
ZKSCAN7-'1C4	2	NaN	3	NaN	NaN		NaN	NaN	NaN
ZMAT2-'1E5	2	NaN	3	NaN	NaN		36.45	81	18.395
ZMAT4-'1A6	2	NaN	3	NaN	NaN		0	1.19	0
ZMYM3-'2B9	2	NaN	3	NaN	NaN		13.675	12.365	23.37
ZNF134-'3E11	2	NaN	3	NaN	NaN		3.76	5.895	4.57
ZNF155-'1A5	2	NaN	3	NaN	NaN		0.09	3.76	1.465
ZNF189-'3C5	2	NaN	3	NaN	NaN		3.275	6.145	4.945
ZNF230-'4B6	2	NaN	3	NaN	NaN		1.885	1.855	1.465
ZNF232-'1D5	2	NaN	3	NaN	NaN		4.56	2.495	5.17
ZNF24-'1G5	2	NaN	3	NaN	NaN		32.5	17.685	10.55
ZNF264-'1D5	2	NaN	3	NaN	NaN		0.96	0.565	2.31
ZNF264-'1H4	2	NaN	3	NaN	NaN		0.96	0.565	2.31
ZNF280A-'1C4	2	NaN	3	NaN	NaN		13.595	0.095	0.755
ZNF280D-'1D11	2	NaN	3	NaN	NaN		13.575	9.54	4.08
ZNF296-'1D6	2	NaN	3	NaN	NaN		0.13	0.48	0.2
ZNF335-'2C1	2	NaN	3	NaN	NaN		4.43	8.295	6.66
ZNF341-'3B10	2	NaN	3	NaN	NaN		0.83	1.705	1.325
ZNF354A-'1D7	2	NaN	3	NaN	NaN		1.595	12.615	1.775
ZNF354B-'1A8	2	NaN	3	NaN	NaN		10.66	12.29	4.835
ZNF358-'1A6	2	NaN	3	NaN	NaN		3.945	4.895	22.46
ZNF384-'1E8	2	NaN	3	NaN	NaN		NaN	NaN	NaN
ZNF385B-'1A1	2	NaN	3	NaN	NaN		0.03	0.665	3.73
ZNF408-'1F6	2	NaN	3	NaN	NaN		3.76	4.32	8.11
ZNF410-'1D7	2	NaN	3	NaN	NaN		22.75	37.94	10.985
ZNF438-'1A11	2	NaN	3	NaN	NaN		0.405	1.995	0.55
ZNF438-'1H5	2	NaN	3	NaN	NaN		0.405	1.995	0.55
ZNF446-'3C8	2	NaN	3	NaN	NaN		1.22	3.185	2.055
ZNF48-'1B9	2	NaN	3	NaN	NaN		2.735	7.455	6.325
ZNF483-'1C11	2	NaN	3	NaN	NaN		0.21	1.75	1.04
ZNF485-'1G1	2	NaN	3	NaN	NaN		6.48	5.36	0.755
ZNF543-'1A8	2	NaN	3	NaN	NaN		1.325	1.365	1.38
ZNF548-'1E11	2	NaN	3	NaN	NaN		4.545	7.045	12.075
ZNF549-'2A2	2	NaN	3	NaN	NaN		0.23	2.435	1.735
ZNF556-'1G1	2	NaN	3	NaN	NaN		0	0	2.985
ZNF574-'1G10	2	NaN	3	NaN	NaN		6.24	5.815	5.42
ZNF574-'2A9	2	NaN	3	NaN	NaN		6.24	5.815	5.42
ZNF581-'1A12	2	NaN	3	NaN	NaN		12.82	6.235	30.975
ZNF623-'2C3	2	NaN	3	NaN	NaN		6.9	12.55	4.15
ZNF654-'1G11	2	NaN	3	NaN	NaN		2.185	5.005	0.89
ZNF689-'1A4	2	NaN	3	NaN	NaN		5.44	4.66	6.515
ZNF704-'3C10	2	NaN	3	NaN	NaN		NaN	NaN	NaN
ZNF746-'1B7	2	NaN	3	NaN	NaN		6.025	3.8	2.25
ZNF746-'1D7	2	NaN	3	NaN	NaN		6.025	3.8	2.25
ZNF783-'2A8	2	NaN	3	NaN	NaN		5.83	7.225	3.07
ZNF784-'1A4	2	NaN	3	NaN	NaN		1.73	2.035	2.795
ZNF800-'2C12	2	NaN	3	NaN	NaN		17.41	8.495	3.735
ZNF81-'2C7	2	NaN	3	NaN	NaN		3.795	3.175	0.885
ZNF98-'1A11	2	NaN	3	NaN	NaN		0.005	0.455	0
ZNFX1-'1E6	2	NaN	3	NaN	NaN		1.945	8.765	1.955
ZSCAN2-'1G6	2	NaN	3	NaN	NaN		5.48	6.255	6.825
ZSCAN2-'2D7	2	NaN	3	NaN	NaN		5.48	6.255	6.825
ZSCAN25-'1A6	2	NaN	3	NaN	NaN		NaN	NaN	NaN
ZXDC-'2B5	2	NaN	3	NaN	NaN		5.08	14.815	12.035
ZXDC-'3D1	2	NaN	3	NaN	NaN		5.08	14.815	12.035
ABTB1-'1C5	3	NaN	3	NaN	NaN		0.895	6.355	9.805
AKNA-'1C7	3	NaN	3	NaN	NaN		1.485	4.175	2.395
ANAPC2-'3H3	3	NaN	3	NaN	NaN		12.28	30.94	11.24
ANAPC2-'3H7	3	NaN	3	NaN	NaN		12.28	30.94	11.24
ANKHD1-'1B3	3	NaN	3	NaN	NaN		87.085	89.115	46.25
ARID2-'1A1	3	NaN	3	NaN	NaN		NaN	NaN	NaN
ARID3A-'1E9	3	NaN	3	NaN	NaN		22.235	3.58	54.485
ARNT-'2D11	3	NaN	3	NaN	NaN		NaN	NaN	NaN
ASCL4-'2G8	3	NaN	3	NaN	NaN		0	0.01	0
ASF1A-'1H3	3	NaN	3	NaN	NaN		19.62	16.63	7.525
ATAD2-'2D9	3	NaN	3	NaN	NaN		33.66	73.675	18.86
ATF7-'2C10	3	NaN	3	NaN	NaN		13.5	16.69	9.22
BACH2-'1E4	3	NaN	3	NaN	NaN		1.955	0.285	0.01
BACH2-'3B8	3	NaN	3	NaN	NaN		1.955	0.285	0.01
BATF-'1C10	3	NaN	3	NaN	NaN		0.115	15.845	0.38
BCL11A-'1G10	3	NaN	3	NaN	NaN		0	0.02	0
BMI1-'1G9	3	3	3	NaN	NaN		41.99	73.865	17.645
BMI1-'1H1	3	3	3	NaN	NaN		41.99	73.865	17.645
BOLA3-'1A5	3	NaN	3	NaN	NaN		85.09	35.54	45.12
BOLA3-'1C10	3	NaN	3	NaN	NaN		85.09	35.54	45.12
BRD1-'2B7	NaN	3	3	NaN	NaN		1.52	5.225	3.48
BRD3-'1C12	3	3	3	NaN	NaN		2.76	11.555	7.745
BRD3-'1D12	NaN	3	3	NaN	NaN		2.76	11.555	7.745
BRD9-'1H8	3	3	3	NaN	NaN		10.86	19.94	3.5
BRPF1-'1B2	NaN	3	3	NaN	NaN		9.03	10.595	4.455
BRPF1-'2E11	3	3	3	NaN	NaN		9.03	10.595	4.455
BRWD1-'2C12	3	3	3	NaN	NaN		20.57	31.815	7.665
BSX-'5H1	3	NaN	3	NaN	NaN		0	0	0
CARM1-'1B4	3	NaN	3	NaN	NaN		26.275	28.025	33.14
CASP8AP2-'2A5	3	NaN	3	NaN	NaN		12.17	12.525	2.695
CBFB-'1C5	3	NaN	3	NaN	NaN		27.785	35.05	11.335
CBFB-'3B9	3	NaN	3	NaN	NaN		27.785	35.05	11.335
CBX1-'1A4	3	3	3	NaN	NaN		23.49	111.265	9.66
CBX2-'2B10	3	NaN	3	NaN	NaN		NaN	NaN	NaN
CBX3-'2E1	3	3	3	NaN	NaN		201.375	260.615	27.405
CBX5-'2D8	3	3	3	NaN	NaN		56.365	71.44	8.415
CDC5L-'2C6	3	NaN	3	NaN	NaN		16.085	12.61	5.9
CDX2-'1A3	3	NaN	3	NaN	NaN		0	0	0
CDX2-'1A6	3	NaN	3	NaN	NaN		0	0	0
CEBPE-'1F8	3	NaN	3	NaN	NaN		0.04	0	0.055
CEBPZ-'3C7	3	NaN	3	NaN	NaN		26.285	26.86	8.325
CELF4-'1C3	3	NaN	3	NaN	NaN		NaN	NaN	NaN
CELF6-'1A4	3	NaN	3	NaN	NaN		0.015	0.215	0.665
CHEK2-'1A9	3	NaN	3	NaN	NaN		30.755	45.645	10.865
CLOCK-'1A10	3	NaN	3	NaN	NaN		7.47	8.745	4.325
COPS3-'2D9	3	NaN	3	NaN	NaN		103.79	67.955	24.415
CPEB3-'1C1	3	NaN	3	NaN	NaN		0.255	0.54	0.415
CREB1-'1A6	3	NaN	3	NaN	NaN		31.255	24.955	30.565
CREB3L1-'1B1	3	NaN	3	NaN	NaN		1.325	0.14	0
CREBL2-'1A11	3	NaN	3	NaN	NaN		3.03	10.9	5.08
CSTF2-'1A11	3	NaN	3	NaN	NaN		31.32	29.49	11.335
CTBP1-'1A4	3	NaN	3	NaN	NaN		43.21	37.675	60.9
CTBP2-'2C7	3	NaN	3	NaN	NaN		0.975	40.575	0.03
CTBP2-'2D11	3	NaN	3	NaN	NaN		0.975	40.575	0.03
CXXC1-'1B6	NaN	3	3	NaN	NaN		25.995	20.2	23.83
CXXC1-'1C7	3	3	3	NaN	NaN		25.995	20.2	23.83
CXXC1-'1E5	3	3	3	NaN	NaN		25.995	20.2	23.83
CXXC1-'2A1	NaN	3	3	NaN	NaN		25.995	20.2	23.83
CXXC1-'2A7	NaN	3	3	NaN	NaN		25.995	20.2	23.83
CXXC1-'2C3	NaN	3	3	NaN	NaN		25.995	20.2	23.83
CXXC1-'2D3	NaN	3	3	NaN	NaN		25.995	20.2	23.83
DACH1-'1C9	3	NaN	3	NaN	NaN		0.025	0.37	0
DAXX-'8B5	3	NaN	3	NaN	NaN		17.085	32.22	13
DBX2-'1D8	3	NaN	3	NaN	NaN		0	0	0
DBX2-'1E4	3	NaN	3	NaN	NaN		0	0	0
DDX58-'3D8	3	NaN	3	NaN	NaN		NaN	NaN	NaN
DEAF1-'1A10	3	NaN	3	NaN	NaN		20.59	4.985	16.355
DIS3-'1D7	3	NaN	3	NaN	NaN		22.035	18.315	7.18
DLX3-'2C4	3	NaN	3	NaN	NaN		0	0.98	0.025
DMRT2-'1B11	3	NaN	3	NaN	NaN		0	0.405	0
DMTF1-'1A8	3	NaN	3	NaN	NaN		126.885	92.72	74.08
DNMT3L-'1E3	3	3	3	NaN	NaN		0.045	0	0.64
DPF1-'1A4	NaN	3	3	NaN	NaN		2.065	1.35	0.705
DPF1-'1A9	NaN	3	3	NaN	NaN		2.065	1.35	0.705
DPF1-'1B3	NaN	3	3	NaN	NaN		2.065	1.35	0.705
DPRX-'2F5	3	NaN	3	NaN	NaN		0	0	0.07
DPRX-'3A1	3	NaN	3	NaN	NaN		0	0	0.07
DR1-'1A12	3	NaN	3	NaN	NaN		25.98	10.4	10.33
DRGX-'3F1	3	NaN	3	NaN	NaN		0	0.02	0
DVL2-'1A4	3	NaN	3	NaN	NaN		3.455	7.305	3.84
DVL2-'1C7	3	NaN	3	NaN	NaN		3.455	7.305	3.84
DVL3-'1B10	3	NaN	3	NaN	NaN		13.98	29.795	22.22
DVL3-'2E12	3	NaN	3	NaN	NaN		13.98	29.795	22.22
E2F6-'1F6	3	NaN	3	NaN	NaN		17.01	20.22	15.16
E2F8-'1G6	3	NaN	3	NaN	NaN		8.165	13.165	1.6
ECD-'1D10	3	NaN	3	NaN	NaN		43.725	24.485	11.755
EDF1-'1A3	3	NaN	3	NaN	NaN		144.375	413.335	152.92
EEA1-'1F8	3	NaN	3	NaN	NaN		2.97	6.55	2.285
EEA1-'2H11	3	NaN	3	NaN	NaN		2.97	6.55	2.285
EIF2S1-'1C11	3	NaN	3	NaN	NaN		139.635	233.055	27.32
EIF2S1-'1E2	3	NaN	3	NaN	NaN		139.635	233.055	27.32
EIF4A2-'2B5	3	NaN	3	NaN	NaN		417.09	498.415	329.35
EIF4A3-'3A2	3	NaN	3	NaN	NaN		87.725	124.705	78.14
EIF4E-'1D3	3	NaN	3	NaN	NaN		87.385	81.485	26.63
ELF1-'1C9	3	NaN	3	NaN	NaN		22.205	53.935	16.12
ELF2-'1F1	3	NaN	3	NaN	NaN		31.605	23.995	16.1
ELF2-'5A5	3	NaN	3	NaN	NaN		31.605	23.995	16.1
ELF3-'8F6	3	NaN	3	NaN	NaN		0.415	74.945	42.67
ELK1-'1B9	3	NaN	3	NaN	NaN		17.195	9.425	2.76
ESRRA-'1B10	3	NaN	3	NaN	NaN		18.36	6.04	12.865
ESRRB-'2A6	3	NaN	3	NaN	NaN		14.855	0.055	0.245
ETS1-'1F1	3	NaN	3	NaN	NaN		0.045	0	0.14
ETS2-'1D9	3	NaN	3	NaN	NaN		NaN	NaN	NaN
ETV6-'1A9	3	NaN	3	NaN	NaN		2.165	2.68	1.89
ETV7-'1A6	3	NaN	3	NaN	NaN		0.02	0.085	0
EZH2-'1B3	3	3	3	NaN	NaN		106.68	67.085	13.435
FEZF2-'1A7	3	NaN	3	NaN	NaN		0	0	0
FEZF2-'1B1	3	NaN	3	NaN	NaN		0	0	0
FLI1-'4H6	3	NaN	3	NaN	NaN		NaN	NaN	NaN
FOSB-'1C9	3	NaN	3	NaN	NaN		0.16	5.41	1.71
FOSB-'1D8	3	NaN	3	NaN	NaN		0.16	5.41	1.71
FOSL1-'1G1	3	NaN	3	NaN	NaN		4.44	1.105	2.095
FOXA2-'3A2	3	NaN	3	NaN	NaN		NaN	NaN	NaN
FOXA3-'2A9	3	NaN	3	3	3		8.01	0.135	33.145
FOXB2-'2B2	3	NaN	3	NaN	NaN		0	0	0
FOXC2-'1B6	3	NaN	3	NaN	NaN		NaN	NaN	NaN
FOXI1-'1G11	NaN	NaN	3	3	3		0	0.66	0
FOXJ2-'1D3	3	NaN	3	NaN	NaN		1.71	4.775	1.6
FOXL1-'2B4	3	NaN	3	NaN	NaN		0	0.005	0
FOXL2-'1B4	3	NaN	3	NaN	NaN		2.21	0	0
FOXN1-'2C1	3	NaN	3	NaN	NaN		0	0.155	0.01
FOXO3-'1B7	3	NaN	3	NaN	NaN		NaN	NaN	NaN
FOXO3-'1G5	3	NaN	3	NaN	NaN		NaN	NaN	NaN
FOXP3-'1B2	3	NaN	3	NaN	NaN		0.055	0.21	0.03
FOXP4-'1G7	3	NaN	3	NaN	NaN		1.275	3.16	8.605
G3BP2-'1C7	3	NaN	3	NaN	NaN		71.015	46.22	29.705
GABPB1-'1A2	3	NaN	3	NaN	NaN		28.26	37.835	13.14
GBX1-'2B3	3	NaN	3	NaN	NaN		0	0	0
GBX1-'2F8	3	NaN	3	NaN	NaN		0	0	0
GCM2-'1B3	3	NaN	3	NaN	NaN		0.01	0.005	0
GLI1-'1E	NaN	NaN	3	NaN	NaN		0.465	0.08	0.115
GLIS3-'1B11	3	NaN	3	NaN	NaN		NaN	NaN	NaN
GMEB2-'1C6	3	NaN	3	NaN	NaN		4.745	7.14	6.69
GRHL1-'1F9	3	NaN	3	NaN	NaN		3.875	16.67	6.905
GRHL2-'2B9	3	NaN	3	NaN	NaN		0	46.375	0
GTF2B-'1D1	3	NaN	3	NaN	NaN		NaN	NaN	NaN
GTF2B-'1H2	3	NaN	3	NaN	NaN		NaN	NaN	NaN
GTF2E1-'2C12	3	NaN	3	NaN	NaN		NaN	NaN	NaN
GTF2F2-'1B4	NaN	3	3	NaN	NaN		13.735	16.785	5.795
GTF2H1-'1A10	3	NaN	3	NaN	NaN		NaN	NaN	NaN
GTF2H2-'1B9	3	3	3	NaN	NaN		25.165	17.565	7.74
GTF2I-'1A7	3	NaN	3	NaN	NaN		41.925	145.47	39.2
GTF2I-'1B10	3	NaN	3	NaN	NaN		41.925	145.47	39.2
GTF2IRD2-'1B4	3	NaN	3	NaN	NaN		6.395	12.7	6.285
HDAC1-'2E12	3	NaN	3	NaN	NaN		NaN	NaN	NaN
HDAC10-'1B2	3	NaN	3	NaN	NaN		NaN	NaN	NaN
HDAC6-'1D9	3	NaN	3	NaN	NaN		67.73	23.44	61.17
HDAC7-'1A3	3	NaN	3	NaN	NaN		20	11.3	6.03
HDAC8-'2A3	3	NaN	3	NaN	NaN		13.475	11.72	6.38
HDAC8-'2C8	3	NaN	3	NaN	NaN		13.475	11.72	6.38
HDGFL1-'1A11	3	NaN	3	NaN	NaN		0.025	0.025	0.005
HDGFRP2-'3C4	3	NaN	3	NaN	NaN		10.99	9.15	14.04
HELLS-'2A3	3	NaN	3	NaN	NaN		13.615	57.755	11.39
HES1-'1B11	3	NaN	3	NaN	NaN		4.19	20.345	9.71
HES1-'2E8	3	NaN	3	NaN	NaN		4.19	20.345	9.71
HES3-'1A10	3	NaN	3	NaN	NaN		0	0	0
HEY2-'1H7	3	NaN	3	NaN	NaN		0.03	11.505	0.03
HEY2-'3A7	3	NaN	3	NaN	NaN		0.03	11.505	0.03
HEYL-'1G9	3	NaN	3	NaN	NaN		0.235	0.495	0.01
HHEX-'1H3	3	NaN	3	NaN	NaN		44.98	4.175	26.13
HHEX-'2B6	3	NaN	3	NaN	NaN		44.98	4.175	26.13
HIF3A-'1C6	3	NaN	3	NaN	NaN		0	0.015	0.185
HINFP-'1A1	3	NaN	3	NaN	NaN		22	20.015	14.88
HMGA1-'1B6	3	NaN	3	NaN	NaN		203.84	14.03	68.835
HMGB1-'1E4	3	NaN	3	NaN	NaN		238.37	645.295	56.795
HMGB1-'2G1	3	NaN	3	NaN	NaN		238.37	645.295	56.795
HMGN1-'1B2	3	NaN	3	NaN	NaN		239.5	623.325	52.545
HMGN1-'1G10	3	NaN	3	NaN	NaN		239.5	623.325	52.545
HMGXB4-'1B3	3	NaN	3	NaN	NaN		15.42	14.845	8.67
HMGXB4-'3F4	3	NaN	3	NaN	NaN		15.42	14.845	8.67
HOPX-'1A5	3	NaN	3	NaN	NaN		0	0.01	0
HOXB5-'1C3	3	NaN	3	NaN	NaN		0.385	0.02	0
HOXD9-'1A4	3	NaN	3	NaN	NaN		0	0.015	0
HSF1-'1C1	3	3	3	NaN	NaN		27.005	27.31	21.885
HSF2-'2C1	3	3	3	NaN	NaN		43.27	19.615	14.625
ID1-'2F11	3	NaN	3	NaN	NaN		59.34	35.67	175.51
ID4-'3C6	3	NaN	3	NaN	NaN		0	3.18	0.075
IGF2BP1-'2D4	3	NaN	3	NaN	NaN		18.43	0.545	18.65
INSM1-'1A6	3	NaN	3	NaN	NaN		0	0.025	0
IRF2-'1A4	3	NaN	3	NaN	NaN		8.215	6.61	16.625
IRF2-'1B2	3	NaN	3	NaN	NaN		8.215	6.61	16.625
IRF3-'1G7	3	NaN	3	NaN	NaN		37.375	45.82	38.92
IRF3-'6C8	3	NaN	3	NaN	NaN		37.375	45.82	38.92
IRX2-'1B7	3	NaN	3	NaN	NaN		NaN	NaN	NaN
IRX2-'1C1	3	NaN	3	NaN	NaN		NaN	NaN	NaN
IRX5-'1C11	3	NaN	3	NaN	NaN		0.485	3.77	0
ISL1-'1A9	3	NaN	3	NaN	NaN		0	1.09	0
JAZF1-'1A5	NaN	ND	3	NaN	NaN		0.055	1.29	0
JAZF1-'1B8	3	ND	3	NaN	NaN		0.055	1.29	0
JAZF1-'1C1	NaN	ND	3	NaN	NaN		0.055	1.29	0
JUNB-'3G2	3	NaN	3	NaN	NaN		NaN	NaN	NaN
JUP-'1B1	3	NaN	3	NaN	NaN		NaN	NaN	NaN
KBTBD10-'4B8	3	NaN	3	NaN	NaN		NaN	NaN	NaN
KCMF1-'1H4	3	NaN	3	NaN	NaN		44.645	67.485	61.745
KDM1A-'1A4	NaN	3	3	NaN	NaN		149.18	71.965	66.05
KDM1A-'1B2	3	3	3	NaN	NaN		149.18	71.965	66.05
KDM8-'1A2	3	NaN	3	NaN	NaN		2.785	2.96	2.2
KHDRBS1-'2E2	3	NaN	3	NaN	NaN		33.54	55.645	13.63
KHDRBS3-'1D3	3	NaN	3	NaN	NaN		1.465	2.85	13
KLF1-'1C6	3	NaN	3	NaN	NaN		32.07	0.005	0
KLF10-'1D6	3	NaN	3	NaN	NaN		6.52	49.785	14.345
KLF14-'1C12	3	NaN	3	NaN	NaN		0.015	0.095	0
KLF14-'1H1	3	NaN	3	NaN	NaN		0.015	0.095	0
KLF15-'1H3	3	NaN	3	NaN	NaN		1.095	0.045	3.76
KLF16-'1E9	3	NaN	3	NaN	NaN		2.635	1.3	2.465
KLF17-'2F4	3	NaN	3	NaN	NaN		0.04	0	0
KLF5-'1A3	3	NaN	3	NaN	NaN		0.965	35.385	4.96
L3MBTL4-'4D1	3	NaN	3	NaN	NaN		0	0	7.415
LDB1-'1C5	3	3	3	NaN	NaN		93.495	30.605	29.66
LHX2-'2D12	3	NaN	3	NaN	NaN		0.005	3.445	0
LHX2-'2G5	3	NaN	3	NaN	NaN		0.005	3.445	0
LHX4-'1B6	3	NaN	3	NaN	NaN		0.01	0.98	0.02
LHX4-'1C11	3	NaN	3	NaN	NaN		0.01	0.98	0.02
LHX5-'1B7	3	NaN	3	NaN	NaN		NaN	NaN	NaN
LIN28A-'1E2	3	NaN	3	NaN	NaN		1.615	0	0.005
LRRFIP1-'3A8	3	NaN	3	NaN	NaN		13.75	55.335	21.845
MAFB-'1A10	3	NaN	3	NaN	NaN		0	4.32	0.07
MAFF-'1A8	3	NaN	3	NaN	NaN		2.65	0.78	9.46
MAP3K7-'1B9	3	NaN	3	NaN	NaN		32.915	30.385	13.995
MAT2B-'1G7	3	NaN	3	NaN	NaN		NaN	NaN	NaN
MAX-'1E7	3	NaN	3	NaN	NaN		32.925	37.885	18.38
MAZ-'1D5	3	NaN	3	NaN	NaN		151.2	140.045	138.46
MBNL3-'1D11	3	NaN	3	NaN	NaN		0.12	9.635	133.685
MED1-'1A9	3	3	3	NaN	NaN		27.75	13.135	22.9
MED21-'4B5	3	3	3	NaN	NaN		NaN	NaN	NaN
MED21-'4F3	NaN	3	3	NaN	NaN		NaN	NaN	NaN
MED22-'1E4	NaN	3	3	NaN	NaN		NaN	NaN	NaN
MED22-'2A7	NaN	3	3	NaN	NaN		NaN	NaN	NaN
MED30-'1B12	NaN	3	3	NaN	NaN		NaN	NaN	NaN
MED30-'1C3	NaN	3	3	NaN	NaN		NaN	NaN	NaN
MED4-'1A6	3	3	3	NaN	NaN		NaN	NaN	NaN
MED6-'3D10	3	3	3	NaN	NaN		27.17	52.43	25.285
MED7-'1B8	3	3	3	NaN	NaN		NaN	NaN	NaN
MED7-'1C4	NaN	3	3	NaN	NaN		NaN	NaN	NaN
MED8-'1A4	3	3	3	NaN	NaN		NaN	NaN	NaN
MED8-'1B4	NaN	3	3	NaN	NaN		NaN	NaN	NaN
MED9-'1D6	NaN	3	3	NaN	NaN		NaN	NaN	NaN
MEF2B-'2A11	3	NaN	3	NaN	NaN		0.125	0.37	1.205
MEF2C-'1D4	3	NaN	3	NaN	NaN		21.795	0.47	0.005
MESP1-'1D11	3	NaN	3	NaN	NaN		0.13	0.065	0
MESP2-'1D4	3	NaN	3	NaN	NaN		0.07	0.02	0
METTL21A-'2D2	3	NaN	3	NaN	NaN		NaN	NaN	NaN
MINA-'1D1	3	NaN	3	NaN	NaN		16.715	15.29	12.245
MIS18BP1-'1B10	3	NaN	3	NaN	NaN		13.905	46.96	4.71
MITF-'1D9	3	NaN	3	NaN	NaN		6.4	6.82	0.1
MLLT10-'1C10	3	3	3	NaN	NaN		53.12	28.395	47.37
MLLT10-'1D4	3	3	3	NaN	NaN		53.12	28.395	47.37
MORF4L1-'1G12	3	NaN	3	NaN	NaN		204.42	295.285	121.925
MXI1-'1A3	3	NaN	3	NaN	NaN		14.755	7.6	13.525
MYCN-'1A9	3	NaN	3	NaN	NaN		0	0.37	0
MYOD1-'2A5	3	NaN	3	NaN	NaN		NaN	NaN	NaN
MYOG-'1C5	3	NaN	3	NaN	NaN		0	0.045	0
NACC2-'4B7	3	NaN	3	NaN	NaN		3.44	8.01	3.705
NANOGP1-'2D8	3	NaN	3	NaN	NaN		0	0.015	0.815
NAP1L5-'1A7	3	NaN	3	NaN	NaN		3.26	0.335	0.535
NCOA3-'1A11	3	NaN	3	NaN	NaN		15.07	271.215	18.255
NCOA3-'1B9	3	NaN	3	NaN	NaN		15.07	271.215	18.255
NEDD4L-'2B4	3	NaN	3	NaN	NaN		9.57	10.92	238.175
NEUROD2-'1G1	3	NaN	3	NaN	NaN		NaN	NaN	NaN
NEUROG3-'2A6	3	NaN	3	NaN	NaN		0	0.01	0
NFATC1-'1A2	3	NaN	3	NaN	NaN		1.325	1.89	0.015
NFATC1-'1F4	3	NaN	3	NaN	NaN		1.325	1.89	0.015
NFATC1-'7A6	3	NaN	3	NaN	NaN		1.325	1.89	0.015
NFATC3-'2A12	3	NaN	3	NaN	NaN		51.555	11.415	35.325
NFE2L2-'3D2	3	3	3	NaN	NaN		65.3	57.82	106.735
NFIL3-'2B5	3	NaN	3	NaN	NaN		6.025	8.23	32.61
NFIX-'2D3	3	NaN	3	NaN	NaN		2.63	0.77	1.945
NFKB1-'2B9	3	NaN	3	NaN	NaN		NaN	NaN	NaN
NFKB2-'7H5	3	NaN	3	NaN	NaN		5.42	8.545	8.495
NINJ2-'2B10	3	NaN	3	NaN	NaN		NaN	NaN	NaN
NPM1-'1B4	3	NaN	3	NaN	NaN		NaN	NaN	NaN
NR0B1-'1A10	3	NaN	3	NaN	NaN		0	0	0
NR1D1-'1D2	3	NaN	3	NaN	NaN		0.205	0.77	1.92
NR1D1-'1F1	3	NaN	3	NaN	NaN		0.205	0.77	1.92
NR1D2-'1B12	3	NaN	3	NaN	NaN		1.25	11.625	3.215
NR1H2-'1D11	3	NaN	3	NaN	NaN		18.99	14.075	7.97
NR1H3-'1A1	3	NaN	3	NaN	NaN		17.835	4.985	66.185
NR2C1-'2B12	3	NaN	3	NaN	NaN		27.56	19.335	37.885
NR2E3-'2B6	3	NaN	3	NaN	NaN		0	0.275	0
NR5A1-'1A4	3	NaN	3	NaN	NaN		0.045	0.035	22.47
NR5A2-'1B2	3	NaN	3	NaN	NaN		0.04	2.725	0.105
NR5A2-'1B8	3	NaN	3	NaN	NaN		0.04	2.725	0.105
NRF1-'3H3	NaN	3	3	NaN	NaN		17.895	9.825	6.285
NRF1-'4A3	NaN	NaN	3	NaN	NaN		17.895	9.825	6.285
OBFC1-'1B4	3	NaN	3	NaN	NaN		NaN	NaN	NaN
OLIG2-'1E9	3	NaN	3	NaN	NaN		NaN	NaN	NaN
ONECUT1-'1A1	3	NaN	3	NaN	NaN		0	0.29	2.235
ORC1-'1C4	3	NaN	3	NaN	NaN		53.1	10.205	3.51
OTX2-'1E10	3	NaN	3	NaN	NaN		0.005	0	0
OTX2-'1F7	3	NaN	3	NaN	NaN		0.005	0	0
OVOL2-'1H12	3	NaN	3	NaN	NaN		0	4.24	0.095
OVOL2-'2A1	3	NaN	3	NaN	NaN		0	4.24	0.095
PARP11-'1H1	3	NaN	3	NaN	NaN		0.16	3.76	2.51
PAWR-'1C3	3	NaN	3	NaN	NaN		0	45.975	15.97
PAX5-'1B1	3	NaN	3	NaN	NaN		0	0.36	0
PAX5-'1B7	3	NaN	3	NaN	NaN		0	0.36	0
PAX9-'1G1	3	NaN	3	NaN	NaN		0.75	5	0.02
PBX4-'1H1	3	NaN	3	NaN	NaN		1.78	3.89	0
PCGF3-'1B4	NaN	3	3	NaN	NaN		27.355	29.02	51.705
PCGF6-'1A11	NaN	3	3	NaN	NaN		11.525	10.285	2.94
PCGF6-'1A2	3	3	3	NaN	NaN		11.525	10.285	2.94
PDX1-'2C11	3	NaN	3	NaN	NaN		NaN	NaN	NaN
PGBD1-'3C5	3	NaN	3	NaN	NaN		4.705	0.965	2.38
PGBD1-'4C8	3	NaN	3	NaN	NaN		4.705	0.965	2.38
PHF10-'2A10	3	NaN	3	NaN	NaN		26.125	36.32	52.275
PHF17-'1H6	3	NaN	3	NaN	NaN		9.535	5.795	3.135
PHF19-'2D9	3	NaN	3	NaN	NaN		244.985	40.775	16.425
PHF21B-'1G3	3	NaN	3	NaN	NaN		0	1.15	0.005
PHF7-'1A1	3	NaN	3	NaN	NaN		17.1	4.25	6.465
PIKFYVE-'3C9	3	NaN	3	NaN	NaN		13.485	7.46	11.01
PIKFYVE-'4G10	3	NaN	3	NaN	NaN		13.485	7.46	11.01
PLXNB1-'3G4	3	NaN	3	NaN	NaN		7.055	43.6	97.805
POGZ-'1B2	3	NaN	3	NaN	NaN		NaN	NaN	NaN
POLE3-'2B11	3	NaN	3	NaN	NaN		85.28	180.07	18.825
POU3F2-'1A3	3	NaN	3	NaN	NaN		NaN	NaN	NaN
POU3F2-'3E6	3	NaN	3	NaN	NaN		NaN	NaN	NaN
POU6F1-'1A1	3	NaN	3	NaN	NaN		2.075	0.125	0.605
PPARD-'2C10	3	NaN	3	NaN	NaN		8.185	3.52	8.945
PPP1R13L-'2G4	3	NaN	3	NaN	NaN		2.67	14.83	4.7
PPP5C-'1F7	3	NaN	3	NaN	NaN		NaN	NaN	NaN
PPP5C-'1H9	3	NaN	3	NaN	NaN		NaN	NaN	NaN
PRDM1-'2C5	3	3	3	NaN	NaN		0.115	0.315	0.045
PRDM13-'1D8	3	NaN	3	NaN	NaN		0	0	0
PRDM13-'2C12	3	NaN	3	NaN	NaN		0	0	0
PRDM16-'2B2	3	NaN	3	NaN	NaN		NaN	NaN	NaN
PRDM2-'2A1	3	3	3	NaN	NaN		9.7	13.1	4.04
PRDM2-'2A4	3	3	3	NaN	NaN		9.7	13.1	4.04
PRDM5-'1H5	3	NaN	3	NaN	NaN		NaN	NaN	NaN
PRDM7-'3D3	3	NaN	3	NaN	NaN		0.005	0.04	0.01
PRDM7-'3F10	3	NaN	3	NaN	NaN		0.005	0.04	0.01
PRDM8-'1A1	3	NaN	3	NaN	NaN		0	0	0.04
PRRX2-'4F12	3	NaN	3	NaN	NaN		0.01	0.36	0.015
PUM1-'1C3	3	NaN	3	NaN	NaN		36.995	38.045	56.35
QKI-'2F10	3	NaN	3	NaN	NaN		NaN	NaN	NaN
RAX-'1B4	3	NaN	3	NaN	NaN		0	0	0
RAX-'1C8	3	NaN	3	NaN	NaN		0	0	0
RCOR2-'1E10	NaN	3	3	NaN	NaN		1.835	0.42	5.26
RCOR3-'1B2	3	3	3	NaN	NaN		29.91	25.635	19.845
RCOR3-'1B6	NaN	3	3	NaN	NaN		29.91	25.635	19.845
RELB-'1B1	3	NaN	3	NaN	NaN		0.185	1.615	1.865
RFX5-'1E5	3	NaN	3	NaN	NaN		24.275	26.745	12.16
RFX6-'1B12	3	NaN	3	NaN	NaN		0	0.025	0.015
RNF113B-'2F4	3	NaN	3	NaN	NaN		0	0	0
RNF113B-'3D10	3	NaN	3	NaN	NaN		0	0	0
RNF20-'1D7	3	3	3	NaN	NaN		11.335	26.49	7.995
RORA-'2C2	3	NaN	3	NaN	NaN		0	1.125	23.025
RPRD1A-'1D9	3	NaN	3	NaN	NaN		76.155	32.915	23.955
RPS6KA5-'1A8	3	NaN	3	NaN	NaN		2.69	4.38	0.295
RUNX1-'3D7	3	NaN	3	NaN	NaN		NaN	NaN	NaN
RUVBL1-'1A1	3	NaN	3	NaN	NaN		50.205	73.365	18.915
RXRA-'2A8	3	NaN	3	NaN	NaN		2.62	20.67	12.945
SAMD4B-'2A6	3	NaN	3	NaN	NaN		23.425	27.945	21.13
SATB1-'3B6	3	NaN	3	NaN	NaN		0.945	0.205	0.05
SATB1-'3H2	3	NaN	3	NaN	NaN		0.945	0.205	0.05
SCAND3-'1C2	3	NaN	3	NaN	NaN		29.04	0.965	0.895
SCAND3-'1D9	3	NaN	3	NaN	NaN		29.04	0.965	0.895
SCML4-'1D6	3	3	3	NaN	NaN		0	0	0.015
SCML4-'1F9	NaN	3	3	NaN	NaN		0	0	0.015
SCRT1-'1B1	3	NaN	3	NaN	NaN		0.01	0.005	0
SCXA-'1D2	3	NaN	3	NaN	NaN		NaN	NaN	NaN
SCXA-'2D11	3	NaN	3	NaN	NaN		NaN	NaN	NaN
SET-'1C6	3	NaN	3	NaN	NaN		251.89	473.115	50.405
SETD6-'1E8	3	NaN	3	NaN	NaN		16.205	14.985	15.115
SFMBT1-'2C1	3	NaN	3	NaN	NaN		2.31	10.625	2.37
SHOX-'1A8	3	NaN	3	NaN	NaN		0	0	0
SIN3B-'1A9	3	NaN	3	NaN	NaN		NaN	NaN	NaN
SIRT1-'1E11	3	3	3	NaN	NaN		9.36	14.17	5.09
SIRT1-'1F6	3	3	3	NaN	NaN		9.36	14.17	5.09
SIRT3-'1C10	3	NaN	3	NaN	NaN		12.96	9.59	11.27
SIRT5-'1D4	3	NaN	3	NaN	NaN		8.8	4.985	10.025
SIRT6-'1E2	3	NaN	3	NaN	NaN		NaN	NaN	NaN
SLC25A24-'3G2	3	NaN	3	NaN	NaN		NaN	NaN	NaN
SLC30A9-'1C3	3	NaN	3	NaN	NaN		41.295	28.12	14.495
SMAD1-'1B12	3	NaN	3	NaN	NaN		2.955	13.495	8.625
SMAD2-'1C12	3	3	3	NaN	NaN		27.32	34	22.65
SMAD4-'1C10	NaN	3	3	NaN	NaN		38.35	27.535	37.565
SMAD4-'1D12	3	3	3	NaN	NaN		38.35	27.535	37.565
SMAD4-'1D3	NaN	3	3	NaN	NaN		38.35	27.535	37.565
SMAD4-'1G11	NaN	3	3	NaN	NaN		38.35	27.535	37.565
SMAD4-'1G12	3	3	3	NaN	NaN		38.35	27.535	37.565
SMAD4-'2A5	NaN	3	3	NaN	NaN		38.35	27.535	37.565
SMAD4-'2B3	NaN	3	3	NaN	NaN		38.35	27.535	37.565
SMAD4-'2D1	NaN	3	3	NaN	NaN		38.35	27.535	37.565
SMARCAL1-'1C4	NaN	3	3	NaN	NaN		17.695	9.385	12.985
SMARCAL1-'1G7	NaN	3	3	NaN	NaN		17.695	9.385	12.985
SMARCB1-'2C4	3	3	3	NaN	NaN		68.36	81.8	84.325
SMARCC2-'7B6	3	3	3	NaN	NaN		34.09	63.88	14.015
SMARCE1-'1G7	3	3	3	NaN	NaN		35.495	60.3	30.39
SMARCE1-'2E9	3	3	3	NaN	NaN		35.495	60.3	30.39
SMARCE1-'2F1	NaN	3	3	NaN	NaN		35.495	60.3	30.39
SMURF1-'1A10	3	NaN	3	NaN	NaN		6.265	26.01	5.25
SNAI3-'1G2	3	NaN	3	NaN	NaN		1.225	0.12	0.175
SNAPC4-'1G11	3	3	3	NaN	NaN		1.91	2.71	1.285
SNAPC4-'3A7	NaN	3	3	NaN	NaN		1.91	2.71	1.285
SNW1-'2A1	3	NaN	3	NaN	NaN		32.09	52.455	13.105
SOHLH1-'2D12	3	NaN	3	NaN	NaN		0.1	0	0.11
SOX10-'1D8	3	NaN	3	NaN	NaN		0	0	0
SOX12-'1C4	3	NaN	3	NaN	NaN		1.57	2.21	6.245
SOX12-'1E4	3	NaN	3	NaN	NaN		1.57	2.21	6.245
SOX13-'1C4	3	NaN	3	NaN	NaN		0.05	17.985	10.535
SOX2-'1B3	3	NaN	3	3	3		0	11.21	0.005
SOX3-'1A1	3	NaN	3	NaN	NaN		0	3.45	0
SOX4-'3B5	3	NaN	3	NaN	NaN		0.005	28.355	1.525
SOX5-'1C12	3	NaN	3	NaN	NaN		8.935	0.21	11.185
SOX8-'1F4	3	NaN	3	NaN	NaN		NaN	NaN	NaN
SOX9-'1A2	3	NaN	3	NaN	NaN		0	3.125	10.49
SOX9-'1E5	3	NaN	3	NaN	NaN		0	3.125	10.49
SP110-'1D9	3	NaN	3	NaN	NaN		1.37	3.755	5.4
SP140-'1G12	3	NaN	3	NaN	NaN		0.805	0.13	0.425
SP140-'3G1	3	NaN	3	NaN	NaN		0.805	0.13	0.425
SP5-'2A5	3	NaN	3	NaN	NaN		0.11	0.005	31.29
SPIC-'2C11	3	NaN	3	NaN	NaN		0	0	0
SRF-'1F1	3	NaN	3	NaN	NaN		NaN	NaN	NaN
SRY-'1D10	3	NaN	3	NaN	NaN		NaN	NaN	NaN
SRY-'1D7	3	NaN	3	NaN	NaN		NaN	NaN	NaN
SSBP4-'3B5	3	NaN	3	NaN	NaN		NaN	NaN	NaN
STAT1-'3D6	3	NaN	3	NaN	NaN		14.985	47.375	12.795
STAT2-'1E5	3	NaN	3	NaN	NaN		35.685	25.08	57.655
STAT2-'2B9	3	NaN	3	NaN	NaN		35.685	25.08	57.655
STAT3-'2E3	3	NaN	3	NaN	NaN		64.78	21.245	38.83
STAT4-'2A2	3	NaN	3	NaN	NaN		0.015	3.065	0.23
STAT6-'1C6	3	NaN	3	NaN	NaN		NaN	NaN	NaN
TADA2B-'11A3	3	NaN	3	NaN	NaN		2.445	4.455	2.955
TADA3-'1F3	3	NaN	3	NaN	NaN		NaN	NaN	NaN
TARBP2-'1B9	3	NaN	3	NaN	NaN		29.47	39.195	29.085
TAX1BP1-'1D8	3	NaN	3	NaN	NaN		71.57	46.86	53.305
TBX4-'1B11	3	NaN	3	NaN	NaN		NaN	NaN	NaN
TDRKH-'1H2	3	NaN	3	NaN	NaN		11.745	15.32	2.5
TEAD3-'1A4	3	3	3	NaN	NaN		3.175	6.35	11.33
TERF1-'1E5	3	NaN	3	NaN	NaN		11.12	18.325	5.055
TERF2-'1G5	3	NaN	3	NaN	NaN		18.32	16.345	11.505
TERF2IP-'1B6	3	NaN	3	NaN	NaN		19.695	55.565	14.84
TFAP2A-'1C6	3	NaN	3	NaN	NaN		0.095	1.96	0
TFAP2B-'2A4	3	NaN	3	NaN	NaN		0	0	0
TFAP2B-'2E1	3	NaN	3	NaN	NaN		0	0	0
TFAP2C-'1A7	3	NaN	3	NaN	NaN		0.01	66.915	0
TFAP2C-'1B9	3	NaN	3	NaN	NaN		0.01	66.915	0
TFAP2D-'1A11	3	NaN	3	NaN	NaN		0	0	0
TFAP2D-'1A12	3	NaN	3	NaN	NaN		0	0	0
TGIF2LX-'1H4	3	NaN	3	NaN	NaN		0	0	0
THRA-'1F10	3	NaN	3	NaN	NaN		5.39	2.41	5.035
THRB-'1A6	3	NaN	3	NaN	NaN		8.135	4.605	2.935
TOX3-'1A5	3	NaN	3	NaN	NaN		0	1.08	58.57
TOX3-'1A6	3	NaN	3	NaN	NaN		0	1.08	58.57
TP53-'1D9	3	NaN	3	NaN	NaN		5.405	80.895	8.575
TP53-'1F7	3	NaN	3	NaN	NaN		5.405	80.895	8.575
TRDMT1-'1E8	3	NaN	3	NaN	NaN		5.925	2.985	1.01
TRIM24-'1B12	3	3	3	NaN	NaN		43.095	21.31	53.21
TRIM28-'2G5	3	NaN	3	NaN	NaN		NaN	NaN	NaN
TRIM28-'2G8	3	NaN	3	NaN	NaN		NaN	NaN	NaN
TSC22D1-'1A2	3	NaN	3	NaN	NaN		10.31	56.3	11.35
TSC22D4-'3E10	3	NaN	3	NaN	NaN		10.175	7.015	5.69
TSC22D4-'4A4	3	NaN	3	NaN	NaN		10.175	7.015	5.69
U2AF1-'1A8	3	NaN	3	NaN	NaN		27.9	58.11	21.08
UBE3A-'1A2	3	NaN	3	NaN	NaN		31.365	19.32	9.455
UBQLN2-'1C7	3	NaN	3	NaN	NaN		NaN	NaN	NaN
UBR2-'1D12	3	NaN	3	NaN	NaN		NaN	NaN	NaN
USF1-'1C10	3	NaN	3	NaN	NaN		32.875	20.76	20.32
USP13-'2H7	NaN	NaN	3	NaN	NaN		NaN	NaN	NaN
USP7-'1B6	3	3	3	NaN	NaN		31.745	46.055	35.69
VDR-'1F11	3	NaN	3	NaN	NaN		NaN	NaN	NaN
VENTX-'2B9	3	NaN	3	NaN	NaN		0.07	0	0
YBX2-'1D8	3	NaN	3	NaN	NaN		0	5.265	0.075
YBX3-'1D8	3	NaN	3	NaN	NaN		30.8	54.685	62.605
YBX3-'2D12	3	NaN	3	NaN	NaN		30.8	54.685	62.605
YEATS2-'1B3	3	3	3	NaN	NaN		22.055	12.17	18.815
YEATS4-'1D2	3	3	3	NaN	NaN		26.915	30.575	8.15
ZBED1-'1E1	3	NaN	3	NaN	NaN		4.855	4.68	13.895
ZBED3-'2D9	3	NaN	3	NaN	NaN		0.005	4.025	4.765
ZBTB16-'1B7	3	NaN	3	NaN	NaN		0.2	0.005	0
ZBTB22-'1A2	3	NaN	3	NaN	NaN		4.735	3.955	7.53
ZBTB22-'1F7	3	NaN	3	NaN	NaN		4.735	3.955	7.53
ZBTB24-'1E9	3	NaN	3	NaN	NaN		2.505	5.42	0.955
ZBTB25-'1B10	3	NaN	3	NaN	NaN		2.925	7.28	4.645
ZBTB3-'2B2	3	NaN	3	NaN	NaN		NaN	NaN	NaN
ZBTB37-'1G10	3	NaN	3	NaN	NaN		4.64	2.265	1.42
ZBTB39-'1A11	3	NaN	3	NaN	NaN		6.13	5.05	4.025
ZBTB46-'1D1	3	NaN	3	NaN	NaN		0.86	0.9	1.29
ZBTB46-'2C1	3	NaN	3	NaN	NaN		0.86	0.9	1.29
ZBTB5-'1B3	3	NaN	3	NaN	NaN		27.615	10.8	12.175
ZBTB5-'1C4	3	NaN	3	NaN	NaN		27.615	10.8	12.175
ZC3H15-'1D1	3	NaN	3	NaN	NaN		108.635	82.605	41.56
ZCCHC7-'1A3	3	NaN	3	NaN	NaN		45.79	7.37	9.27
ZCCHC7-'1B4	NaN	NaN	3	NaN	NaN		45.79	7.37	9.27
ZEB2-'1C6	3	NaN	3	NaN	NaN		48.61	0.03	0.05
ZFP41-'1A1	3	NaN	3	NaN	NaN		2.24	2.295	2.87
ZFP90-'1C5	3	NaN	3	NaN	NaN		0.88	12.53	11.065
ZFP92-'2B9	3	NaN	3	NaN	NaN		0.685	0.135	0
ZFPM2-'2D5	3	NaN	3	NaN	NaN		7.015	0	0
ZFYVE19-'3C5	3	NaN	3	NaN	NaN		NaN	NaN	NaN
ZFYVE20-'1C3	3	NaN	3	NaN	NaN		10.01	11.425	5.26
ZFYVE20-'2E3	3	NaN	3	NaN	NaN		10.01	11.425	5.26
ZHX2-'1B2	3	NaN	3	NaN	NaN		0	18.165	30.395
ZHX3-'1G3	3	NaN	3	NaN	NaN		3.275	14.91	5.055
ZIC1-'1E3	3	NaN	3	NaN	NaN		0.235	24.57	0
ZIM2-'1D10	3	NaN	3	NaN	NaN		0	0	8.99
ZKSCAN3-'1E8	3	NaN	3	NaN	NaN		7.245	0.69	2.075
ZKSCAN3-'2A4	3	NaN	3	NaN	NaN		7.245	0.69	2.075
ZNF134-'1A2	3	NaN	3	NaN	NaN		3.76	5.895	4.57
ZNF140-'5C1	3	NaN	3	NaN	NaN		4.37	17.765	5.705
ZNF157-'1A8	3	NaN	3	NaN	NaN		0	0.19	0
ZNF165-'2D3	3	NaN	3	NaN	NaN		0.67	1.865	0.415
ZNF165-'2F4	3	NaN	3	NaN	NaN		0.67	1.865	0.415
ZNF169-'1A4	3	NaN	3	NaN	NaN		NaN	NaN	NaN
ZNF174-'1D12	3	NaN	3	NaN	NaN		8.575	10.61	4.825
ZNF18-'4B5	3	NaN	3	NaN	NaN		3.285	3.135	1.575
ZNF192-'1F10	3	NaN	3	NaN	NaN		19.415	7.43	7.07
ZNF197-'2D1	3	NaN	3	NaN	NaN		7.275	2.78	1.35
ZNF2-'1D2	NaN	NaN	3	NaN	NaN		NaN	NaN	NaN
ZNF202-'1C4	3	NaN	3	NaN	NaN		7.555	4.96	5.105
ZNF202-'3G1	3	NaN	3	NaN	NaN		7.555	4.96	5.105
ZNF207-'2D8	3	NaN	3	NaN	NaN		183.85	124.035	88.08
ZNF217-'1G2	3	NaN	3	NaN	NaN		7.47	97.365	13.94
ZNF217-'5H9	3	NaN	3	NaN	NaN		7.47	97.365	13.94
ZNF222-'2C5	3	NaN	3	NaN	NaN		1.26	3.74	1.32
ZNF23-'2A2	3	NaN	3	NaN	NaN		7.515	7.285	6.02
ZNF23-'2A5	3	NaN	3	NaN	NaN		7.515	7.285	6.02
ZNF230-'1E1	3	NaN	3	NaN	NaN		1.885	1.855	1.465
ZNF232-'1B10	3	NaN	3	NaN	NaN		4.56	2.495	5.17
ZNF239-'2A10	3	NaN	3	NaN	NaN		12.11	6.42	0.015
ZNF239-'2F6	3	NaN	3	NaN	NaN		12.11	6.42	0.015
ZNF263-'1C11	3	NaN	3	NaN	NaN		5.98	17.14	7.58
ZNF277-'1A2	3	NaN	3	NaN	NaN		16.555	18.855	14.925
ZNF277-'1E10	3	NaN	3	NaN	NaN		16.555	18.855	14.925
ZNF324-'1B9	3	NaN	3	NaN	NaN		3.015	3.05	0.825
ZNF333-'1H4	3	NaN	3	NaN	NaN		6.67	4.62	4.315
ZNF334-'1B3	3	NaN	3	NaN	NaN		0.035	0.055	4.465
ZNF354A-'1B6	3	NaN	3	NaN	NaN		1.595	12.615	1.775
ZNF397-'2F6	3	NaN	3	NaN	NaN		12.88	8.67	2.905
ZNF428-'1D6	3	NaN	3	NaN	NaN		9.47	12.315	6.6
ZNF444-'1E11	3	NaN	3	NaN	NaN		4.175	11.69	18.715
ZNF446-'2C7	3	NaN	3	NaN	NaN		1.22	3.185	2.055
ZNF467-'2H7	3	NaN	3	NaN	NaN		1.94	2.9	0.02
ZNF488-'1B6	3	NaN	3	NaN	NaN		0.04	5.99	0.075
ZNF496-'1C1	3	NaN	3	NaN	NaN		20.86	7.265	12.17
ZNF496-'1C5	3	NaN	3	NaN	NaN		20.86	7.265	12.17
ZNF503-'1B7	3	NaN	3	NaN	NaN		0	0.2	2.06
ZNF524-'2B4	3	NaN	3	NaN	NaN		2.035	1.2	2.48
ZNF526-'2A4	3	NaN	3	NaN	NaN		3.895	2.705	2.29
ZNF556-'1C3	3	NaN	3	NaN	NaN		0	0	2.985
ZNF570-'1B3	3	NaN	3	NaN	NaN		0.305	1.56	0.735
ZNF583-'1E5	3	NaN	3	NaN	NaN		1.35	0.85	0.495
ZNF584-'1E10	3	NaN	3	NaN	NaN		15.485	6.285	1.75
ZNF585B-'1D8	3	NaN	3	NaN	NaN		3.305	3.545	3.86
ZNF597-'1C4	3	NaN	3	NaN	NaN		0.23	2.415	0.745
ZNF598-'1A12	3	NaN	3	NaN	NaN		13.965	12.68	9.7
ZNF608-'1A10	3	NaN	3	NaN	NaN		0.485	0.59	0.405
ZNF639-'1E7	3	NaN	3	NaN	NaN		20.51	21.855	6.575
ZNF648-'1C5	3	NaN	3	NaN	NaN		0.005	0	0.24
ZNF654-'1C7	3	NaN	3	NaN	NaN		2.185	5.005	0.89
ZNF683-'1E4	3	NaN	3	NaN	NaN		0.01	0	0.005
ZNF696-'1D7	3	NaN	3	NaN	NaN		2.545	1.83	1.955
ZNF697-'1A8	3	NaN	3	NaN	NaN		2.52	1.015	1.455
ZNF7-'1C12	3	NaN	3	NaN	NaN		19.35	19.675	8.46
ZNF701-'1C5	3	NaN	3	NaN	NaN		5.565	6.355	1.045
ZNF75A-'1E5	3	NaN	3	NaN	NaN		10.585	33.25	1.035
ZNF770-'1D7	3	NaN	3	NaN	NaN		30.74	10.64	9.36
ZNF792-'2C6	3	NaN	3	NaN	NaN		6.61	1.94	6.275
ZNF8-'1B7	3	NaN	3	NaN	NaN		3.67	2.995	1.94
ZNF804A-'1H8	3	NaN	3	NaN	NaN		NaN	NaN	NaN
ZNF830-'1C5	3	NaN	3	NaN	NaN		7.1	7.475	3.255
ZNF846-'1F9	3	NaN	3	NaN	NaN		4.45	4.01	2.875
ZNFX1-'1D3	3	NaN	3	NaN	NaN		1.945	8.765	1.955
ZSCAN12-'1A9	3	NaN	3	NaN	NaN		10.095	0.445	1.635
ZSCAN21-'1B2	3	NaN	3	NaN	NaN		7.015	5.44	4.69
ZSCAN22-'1A12	3	NaN	3	NaN	NaN		3.25	2.71	2.165
ZSCAN23-'3G2	3	NaN	3	NaN	NaN		0.225	0	0.19
ZSCAN26-'1F12	3	NaN	3	NaN	NaN		NaN	NaN	NaN
ZSCAN5A-'1G7	3	NaN	3	NaN	NaN		4.565	5.785	6.475
ZSCAN5A-'2B5	3	NaN	3	NaN	NaN		4.565	5.785	6.475
ZUFSP-'1A2	3	NaN	3	NaN	NaN		23.085	11.82	7.17
ZUFSP-'1C12	3	NaN	3	NaN	NaN		23.085	11.82	7.17

## Sheet: Venkataraman Comparison
				Total Clones Tested	45	Passing threshold in at least 1 assay	3	0.0666667
						'1' or '2' in at least 1 assay	13	0.288889
					1: passing threshold, 2: inconclusive, 3: no evidence
	Purchase Status	Venkataraman et al Results	Venkataraman et al Cell line	Lai et al Results	ChIP-exo:RATING	ChIP-seq:RATING	MOTIFENRICH:RATING	PBM:RATING	WESTERN: RATING
ARID3A-'2E9	Not Available	ChIP-seq Validated	HepG2		NaN	NaN	NaN	NaN	NaN
ATF2-'1B4	Available	ChIP-seq Validated	HepG2		2	NaN	3	NaN	NaN
BATF-'1E10	Available	ChIP-seq Validated	GM12878		2	NaN	3	NaN	NaN
BATF3-'1H3	Available	ChIP-seq Validated	GM12878		2	NaN	3	NaN	NaN
DPF1-'1A9	Available	ChIP-seq Validated	K562, MCF7		NaN	3	3	NaN	NaN
DRAP1-'1A8	Available	ChIP-seq Validated	GM12878		NaN	NaN	NaN	NaN	NaN
ETV6-'1A7	Available	ChIP-seq Validated	GM12878		2	NaN	3	NaN	NaN
ETV6-'1A9	Available	ChIP-seq Validated	GM12878		3	NaN	3	NaN	NaN
EZH2-'1B3	Available	ChIP-seq Validated	K562		3	3	3	NaN	NaN
FOXO3-'1B7	Available	ChIP-seq Validated	HepG2		3	NaN	3	NaN	NaN
HES1-'1B11	Available	ChIP-seq Validated	HepG2		3	NaN	3	NaN	NaN
HMG20A-'2H9	Not Available	ChIP-seq Validated	GM12878		NaN	NaN	NaN	NaN	NaN
KLF10-'1D3	Available	ChIP-seq Validated	HepG2, MCF7		NaN	NaN	NaN	NaN	NaN
L3MBTL4-'1C8	Not Available	ChIP-seq Validated	HepG2		NaN	NaN	NaN	NaN	NaN
MED1-'1A11	Available	ChIP-seq Validated	K562		2	3	3	NaN	NaN
NFATC3-'2A12	Available	ChIP-seq Validated	HepG2		3	NaN	3	NaN	NaN
NFIA-'2C6	Available	ChIP-seq Validated	K562, HepG2		1	NaN	1	NaN	NaN
NFIL3-'2B5	Available	ChIP-seq Validated	HepG2		3	NaN	3	NaN	NaN
NRF1-'3D4	Available	ChIP-seq Validated	MCF7, K562		3	1	1	1	1
NRF1-'3H1	Available	ChIP-seq Validated	MCF7, K562		1	1	1	1	1
NRF1-'3H3	Not Available	ChIP-seq Validated	HepG2, K562		NaN	3	3	NaN	NaN
RUVBL1-'1A1	Available	ChIP-seq Validated	HepG2		3	NaN	3	NaN	NaN
SMAD4-'1A5	Not Available	ChIP-seq Validated	HepG2		NaN	NaN	NaN	NaN	NaN
SMAD4-'1D12	Available	ChIP-seq Validated	HepG2		3	3	3	NaN	NaN
SMAD4-'1G12	Not Available	ChIP-seq Validated	HepG2		3	3	3	NaN	NaN
STAT2-'2H10	Not Available	ChIP-seq Validated	GM12878		NaN	NaN	NaN	NaN	NaN
TP73-'1A8	Available	ChIP-seq Validated	GM12878		2	NaN	3	NaN	NaN
TSC22D4-'2A2	Not Available	ChIP-seq Validated	HepG2		NaN	NaN	NaN	NaN	NaN
TSC22D4-'3E10	Available	ChIP-seq Validated	GM12878		3	NaN	3	NaN	NaN
USF2-'1A7	Available	ChIP-seq Validated	HepG2, GM12878		NaN	NaN	NaN	NaN	NaN
WDHD1-'1A5	Not Available	ChIP-seq Validated	MCF7		NaN	NaN	NaN	NaN	NaN
WDHD1-'1B10	Not Available	ChIP-seq Validated	MCF7		2	NaN	3	NaN	NaN
ZBTB2-'46F2	Available	ChIP-seq Validated	HepG2, GM12878		2	NaN	3	NaN	NaN
ZMYM3-'2B9	Available	ChIP-seq Validated	HepG2		2	NaN	3	NaN	NaN
ZMYM3-'2C3	Available	ChIP-seq Validated	HepG2, MCF7		NaN	NaN	NaN	NaN	NaN
ZMYM3-'2F10	Not Available	ChIP-seq Validated	GM12878, K562, HepG2		NaN	NaN	NaN	NaN	NaN
ZNF18-'2D2	Not Available	ChIP-seq Validated	GM12878, K562		NaN	NaN	NaN	NaN	NaN
ZNF410-'2C9	Available	ChIP-seq Validated	K562		NaN	NaN	NaN	NaN	NaN
ZNF597-'1C12	Available	ChIP-seq Validated	ZNF597		NaN	NaN	NaN	NaN	NaN
ZNF639-'1E7	Available	ChIP-seq Validated	K562		3	NaN	3	NaN	NaN
ZNF639-'2B2	Available	ChIP-seq Validated	K562		NaN	NaN	NaN	NaN	NaN
ZNF701-'1C5	Available	ChIP-seq Validated	MCF7		3	NaN	3	NaN	NaN
ZNF75A-'1B6	Available	ChIP-seq Validated	MCF7, K562		NaN	NaN	NaN	NaN	NaN
ZSCAN2-'1F8	Available	ChIP-seq Validated	HepG2, MCF7		NaN	NaN	NaN	NaN	NaN
ZXDC-'2B5	Available	ChIP-seq Validated	MCF7		2	NaN	3	NaN	NaN
