# Supplementary material for: A ChIP-exo screen of 887 Protein Capture Reagents Program transcription factor antibodies in human cells
Source: HighWire-hosted journal article supplement (doi:10.1101/gr.275472.121), 2021-08-23
Supplement: Supplemental_Table_S2.xlsx [file Supplemental_Table_S2.xlsx]

## Sheet: ProjectStats
Supplementary Table 2: ChIP-exo QC
	Project phase	Samples processed		Cellline/Tissue	Samples processed		Sequencing Stats	Read depth	Unique mappability (%)	Duplicate rate (%)	ChExMix Peaks
	PCRP_Phase0	84		K562	1009		Avg	1.26263e+07	77.2302	52.3657	1184.47
	PCRP_PhaseI	611		MCF7	134		Median	11231422	81.7599	53.2493	27.5
	PCRP_PhaseII	428		HepG2	98		Std Dev	1.01017e+07	12.2892	24.5498	3948.29
	PCRP_PhaseIII	138		liver	8		Min	100200	20.5813	12.7086	0
	Total	1261		kidney	4		Max	82746444	90.5737	96.4096	51911
				placenta	4
				Breast	4		chromHMM	Promoter	Transcription	Enhancer	Insulator	Repressed	Heterochromatin
				Total	1261		Avg	-0.494841	-0.436344	-0.570602	-0.331971	-0.299974	0.334755
							Median	-0.715961	-0.191198	-0.666512	-0.225491	-0.0560755	0.396369
		Samples processed					Std Dev	1.07754	0.511509	0.584725	0.65999	0.766674	0.385451
	Unique Targets	681					Min	-2.78497	-3.15687	-2.27327	-3.30923	-4.96554	-2.08422
	Unique Clones	887					Max	3.94184	0.477324	2.47537	3.74117	1.64873	1.31428
	Total Samples	1261					2 StdDev above Avg	1.66024	0.586674	0.598849	0.988008	1.23337	1.10566
		QC Metrics	% Pass Threshold				segway	Promoter	Promoter Active	Inactive Promoter	Transcription	Enhancer	Open chromatin	Insulator	Heterochromatin	Polycomb
	Samples >=1	464	0.376929				Avg	-0.503323	0.461253	-0.0440351	-0.289459	-0.398371	-0.0597235	-0.398521	-0.0966949	-0.0735978
	Samples >=2	110	0.0893582				Median	-0.485143	0.383754	-0.0551853	-0.277359	-0.24201	-0.0303665	-0.353052	-0.0526176	0.0481189
	Samples >=3	69	0.056052				Std Dev	1.24206	1.41561	0.998453	0.318298	0.677858	0.264566	0.996278	0.695285	0.763466
	Avg	0.576767					Min	-3.0585	-4.14648	-4.04451	-3.07833	-3.17013	-1.71901	-3.06453	-3.122	-5.4739
	Median	0					Max	3.83262	2.35378	3.2666	0.899231	1.43787	0.42034	3.22777	1.71505	1.44464
	Std Dev	1.02309					2 StdDev above Avg	1.9808	3.29247	1.95287	0.347136	0.957345	0.469409	1.59403	1.29388	1.45333
	Min	0
	Max	8						deNovo Motif		feature pileup	Promoter pileup	Insulator pileup
							Experiments with Motif	423		Avg	0.270988	0.0884745
							Fraction of Experiments	0.335448		Median	0.140332	0.073365
		Samples Replicated	% Replication							Std Dev	0.639439	0.277567
	Clones Replicated	245	0.276212							Min	-0.438023	-1.69143
	Enrichment Replicated	36	0.146939							Max	1.28109	0.837418
	Failure Replicated	102	0.416327							2 StdDev above Avg	1.54986	0.643608
	No Replication	107	0.436735
	Total Replication	138	0.563265
		QC == 0	QC == 1	QC >= 2
	Avg FPKM	28.7317	24.4023	31.8106
	Median FPKM	8.215	10.7625	20.54
	Std Dev	69.0371	45.4089	80.7853
	Min	0	0	0.01
	Max	645.295	404.485	645.295

## Sheet: SampleStats
ProjectPhase	SampleID	Target	AntibodyID	Cellline/Tissue	substrate FPKM		Read depth	Unique mappability (%)	Duplicate rate (%)	ChExMix Peaks		QC Metrics		Feature enrichment	Promoter Enrichment	Insulator Enrichment		chromHMM	Promoter	Transcription	Enhancer	Insulator	Repressed	Heterochromatin		segway	Active_Promoter	Proximal_Active	Inactive_Promoter	Transcription	Enhancer	Open_Chromatin	Insulator	Heterochromatin	Polycomb		Motif detected
PCRP_Phase0	17385	HMGB1	'4F10	MCF7	645.295		17322629	60.6441	59.996	13260		8			1.75034	1.12587			3.04562	-0.568708	1.09588	3.09755	0.0081146	-0.697874			2.90061	-0.812012	2.05644	-0.62895	0.64769	-0.505679	2.78917	-0.981027	-0.217996		No
PCRP_PhaseIII	28412	YY1	'1B2	liver	unknown		21803540	76.8299	32.5788	10336		8			1.55878	1.07495			2.44768	-1.50832	1.43922	3.24773	-1.94535	-2.08422			2.55092	-1.6301	-1.02089	-1.7615	0.581986	-1.71901	2.19305	-2.1911	-1.64474		Yes
PCRP_Phase0	17378	USF1	'1B8	MCF7	20.76		8141735	73.9552	64.3599	13190		7			2.61462	0.854208			2.7226	-0.602861	1.042	1.80822	-0.0706704	-0.315164			2.64607	-0.382319	1.21032	-0.662364	0.652793	-0.344738	1.47039	-0.722841	-0.146143		Yes
PCRP_Phase0	17377	NRF1	'3H1	MCF7	9.825		6029043	71.9187	57.9379	4931		6			3.22249	0.598115			3.94184	-0.699626	0.920067	1.02198	-0.330677	-0.842193			3.83262	-0.812912	1.7814	-0.827032	0.572838	-0.841836	1.25533	-1.21147	-0.589986		Yes
PCRP_Phase0	17379	YY1	'1B2	MCF7	58.11		37052953	77.7221	48.696	11845		6			1.9611	0.595405			3.1302	-0.593498	0.605718	1.55665	-0.252385	-0.347468			3.06279	-0.42037	0.942773	-0.625829	0.336	-0.428751	1.38952	-0.342768	-0.25502		Yes
PCRP_PhaseI	18745	GATA4	'1A7	HepG2	12.105		27360025	77.8878	45.6969	5226		6			1.00121	0.0239991			2.50421	-1.43265	2.44633	0.0725397	-1.49227	-1.98343			3.01755	-2.41467	2.76616	-1.38216	1.43787	NaN	1.44275	-2.08937	-1.51519		Yes
PCRP_PhaseIII	26326	ZNF81	'2C7	K562	3.795		21155756	85.9717	20.6675	1167		5			0.758274	0.692749			0.898046	-0.36833	0.176694	2.03121	-2.811	-0.0278484			1.32198	-2.76133	NaN	0.412252	-0.147803	NaN	1.84693	-1.87602	-2.62579		Yes
PCRP_PhaseI	18742	PPARA	'2B9	HepG2	10.665		34418610	75.8658	40.8811	7513		5			1.31911	0.31361			2.96018	-0.605498	1.5204	-0.365184	-0.857464	-1.9708			3.20826	-2.31337	3.2666	-0.379301	0.343679	NaN	1.1673	-1.9351	-1.38865		Yes
PCRP_PhaseI	18755	HNF4A	'2A8	HepG2	58.565		12786805	66.3702	66.7998	4612		5			0.64334	0.145447			1.66922	-1.06303	2.47537	-0.475596	-1.26476	-1.19966			2.99922	-1.31193	1.70488	-1.03111	1.3685	NaN	0.994806	-1.08313	-1.07988		Yes
PCRP_PhaseI	18752	RFX3	'1D11	HepG2	3.05		23442371	74.6755	53.4645	2509		5			0.977705	0.281922			2.46451	0.00565986	1.24167	-0.859352	-1.02489	-1.32112			2.47029	-1.82597	2.94755	0.375912	0.205977	NaN	1.35922	-1.32509	-1.17189		No
PCRP_PhaseIII	26316	PRDM16	'1B9	K562	NaN		21543399	85.6384	19.3549	5971		5			1.80384	0.140106			1.99242	-0.272511	0.163531	-1.36804	-3.65027	-0.65168			2.26351	-3.37479	NaN	0.547626	-0.657564	NaN	-0.836523	-2.55249	-3.1136		Yes
PCRP_PhaseIII	26468	USF1	'1B8	K562	32.875		4784223	89.1863	37.1837	9001		5			3.69657	1.04437			1.65439	-1.84366	1.13265	1.21206	-0.0842924	-1.07232			0.830219	-0.388668	NaN	-2.51501	0.473568	NaN	0.487952	-1.89932	-0.236683		Yes
PCRP_PhaseIII	26446	USF1	'1B8	K562	32.875		5474605	90.5737	45.2898	4459		5			2.45036	0.575056			1.76927	-1.8807	1.12132	1.04889	-0.423193	-1.06412			0.902136	-0.458223	NaN	-2.48229	0.51529	NaN	0.395523	-1.78675	-0.636934		Yes
PCRP_Phase0	17365	YY1	'1B2	K562	27.435		13375752	80.4511	38.8389	6342		5			2.53443	1.00343			2.61286	-2.33527	0.297392	-0.421089	-3.21683	-0.906975			2.48381	-2.68575	NaN	-1.61161	-0.176195	NaN	0.178535	-1.67538	-2.81334		Yes
PCRP_PhaseIII	28418	YY1	'1B2	liver	unknown		22311599	60.1934	44.6767	7118		5			1.45814	0.604573			2.64155	-1.3551	1.35647	1.62648	-1.04543	-1.46448			2.7751	-1.47006	0.103659	-1.49469	0.416564	-1.02657	1.02337	-1.60238	-1.21034		Yes
PCRP_Phase0	18114	YY1	'1B2	MCF7	58.11		47555701	84.8818	60.9891	12711		5			1.44133	0.550932			2.89375	-0.387379	0.653177	1.25448	0.0244301	-0.344369			2.80743	-0.41901	1.3882	-0.478506	0.320538	-0.277103	1.22351	0.0178502	-0.240185		Yes
PCRP_Phase0	18121	USF1	'1B8	MCF7	20.76		11591616	71.8307	73.6709	7383		4			1.48214	0.235356			2.20437	-0.330914	0.715539	0.736804	0.0572155	-0.181591			2.12592	-0.176351	1.67777	-0.41789	0.411698	-0.240151	0.699942	-0.218303	-0.151796		Yes
PCRP_PhaseIII	26289	SIX5	'2H4	K562	2.705		21514362	87.3662	21.1864	701		4			0.312122	0.919194			0.294752	-1.21633	-0.331895	3.74117	-2.27906	0.251846			0.0580408	-2.13404	NaN	-0.578797	0.0265298	NaN	3.22777	-1.47864	-1.63893		Yes
PCRP_PhaseIII	26152	NAB2	'2G1	K562	17.38		17143907	77.8169	24.5906	10302		4			2.69786	0.369999			2.71454	-1.45503	0.14826	-1.71695	-3.39786	-1.31107			2.83005	-3.57162	NaN	-0.599164	-0.885201	NaN	-1.34219	-2.54143	-3.39971		Yes
PCRP_PhaseII	22212-22799	NAB2	'2G1	K562	17.38		28658802	85.4887	19.2057	22479		4			2.83101	0.233826			2.87123	-2.1209	0.199883	-2.88581	-3.53056	-1.63142			2.91281	-3.18443	NaN	-1.16076	-0.854417	NaN	-1.82283	-2.54687	-3.46365		Yes
PCRP_PhaseII	24056	GTF2H2C	'2C9	K562	42.265		16749041	71.1614	35.0555	2012		4			1.64123	0.417913			2.10864	-0.969868	0.00314583	-1.40619	-2.52434	-0.318182			2.23663	-1.58951	NaN	-0.123498	-0.422908	NaN	-0.175494	-1.22094	-2.26458		Yes
PCRP_PhaseI	18391	BATF2	'2B9	K562	5		23316468	73.4478	52.6304	9147		4			2.09287	0.526647			2.42967	-1.27766	-0.0096297	-1.26618	-2.55935	-0.628999			2.47636	-1.42661	NaN	-0.629746	-0.514151	NaN	-0.409617	-1.51673	-2.05767		Yes
PCRP_PhaseIII	26303	ZNF438	'1H5	K562	0.405		20965917	81.9441	23.2838	27851		4			3.34868	0.537448			2.64814	-1.10352	0.48234	-2.05511	-3.64327	-1.83314			2.77126	-3.41002	NaN	-0.369341	-0.839375	NaN	-1.62963	-2.73777	-3.68734		Yes
PCRP_PhaseI	18749	PLAG1	'1F5	HepG2	4.825		25814885	72.7731	55.0594	1989		4			0.570383	0.217607			1.69916	-0.210737	0.787803	0.00140521	-0.186506	-0.42801			1.65671	-0.772937	2.0267	0.0377712	0.121411	NaN	1.48884	-0.198883	-0.380074		Yes
PCRP_PhaseIII	26320	ELK1	'1D9	K562	17.195		21385418	77.6686	28.8845	4794		4			1.59857	0.35867			2.25848	-2.0989	0.452103	-1.63677	-2.58733	-0.460842			1.9998	-1.84463	NaN	-1.30414	0.184478	NaN	-0.0444968	-1.51715	-2.50091		Yes
PCRP_PhaseI	18390	NMI	'1C1	K562	9.505		15918564	74.4166	57.5741	3051		4			1.88728	0.736831			1.99785	-0.893258	0.0786752	-0.397301	-0.959057	-0.41236			1.9599	-0.189107	NaN	-0.560341	-0.344714	NaN	-0.346247	-0.99647	-0.709666		Yes
PCRP_PhaseII	22628	PRDM16	'1B9	K562	NaN		29291105	86.0481	25.3545	6993		4			1.77687	0.100893			2.07968	-0.402261	0.182702	-1.82156	-3.40763	-0.679217			2.33127	-3.26662	NaN	0.391011	-0.639847	NaN	-0.882482	-2.01661	-3.22311		No
PCRP_Phase0	17364	USF1	'1B8	K562	32.875		1364096	74.2159	62.36	1160		4			3.01122	1.12766			1.47486	-1.13048	0.80955	0.822632	-0.305988	-0.580569			0.54923	0.700746	NaN	-1.442	0.202096	NaN	0.0158365	-0.682833	-0.290012		Yes
PCRP_Phase0	18113	USF1	'1B8	MCF7	20.76		4112059	83.8597	74.6191	582		4			1.75416	0.854451			1.73389	-0.471269	0.32541	0.738217	-0.0924553	0.00753072			1.67247	0.0754132	0.108286	-0.46987	0.0503474	-0.191158	0.616433	-0.145831	-0.125592		Yes
PCRP_PhaseIII	26328-28262	USF1	'1B8	K562	32.875		23172083	90.3006	45.1916	22640		4			2.76009	0.614909			1.19676	-1.44235	0.907838	1.14487	0.205268	-0.526483			0.513931	0.220851	NaN	-1.79655	0.292306	NaN	0.392181	-1.21286	0.202483		Yes
PCRP_PhaseII	23813-24138	USF1	'1B8	K562	32.875		11765966	89.2128	35.8375	12577		4			2.39396	0.455241			1.13921	-1.24241	0.835314	1.07787	0.203615	-0.472533			0.395762	0.375177	NaN	-1.64361	0.270983	NaN	0.281056	-1.24707	0.229874		Yes
PCRP_PhaseIII	28409	USF1	'1B8	K562	32.875		4493511	78.0903	47.989	2496		4			1.87874	0.147921			2.03067	-2.36882	1.31292	0.685918	-1.08529	-1.63927			1.10001	-1.464	NaN	-3.07833	0.66527	NaN	0.0639587	-1.96211	-1.66301		Yes
PCRP_PhaseIII	28417	USF1	'1B8	liver	unknown		18407078	84.9861	35.3689	875		4			0.742369	0.0456269			2.13815	-0.846535	1.1607	-0.145072	-0.359697	-0.676282			2.28844	-0.895981	0.114511	-0.929696	0.465663	-0.442254	0.177732	-0.542546	-0.65675		Yes
PCRP_PhaseI	18766	USF1	'1B8	HepG2	20.32		19835848	69.2131	57.8868	1875		4			0.318667	-0.058363			1.82993	-0.208516	0.910747	0.100861	-0.130916	-0.554263			2.53743	-0.766196	1.60393	-0.12514	0.240582	NaN	1.31149	-0.592722	-0.393279		Yes
PCRP_PhaseIII	28424	YY1	'1B2	kidney	unknown		20732705	68.9501	36.2214	5079		4			1.27557	0.36648			2.33807	-1.7136	1.19285	-0.466766	-1.35727	-1.97711			2.29366	-1.66684	-0.542054	-2.06221	0.261951	-1.3659	-0.398426	-2.24902	-1.53143		Yes
PCRP_PhaseIII	26304	SMAD2	'1B10	K562	27.32		22780046	82.4899	21.5365	27411		4			3.13761	0.477504			2.53354	-0.309564	0.274813	-1.4244	-4.96554	-2.01005			2.66682	-4.14648	NaN	0.401504	-1.16242	NaN	-1.76138	-3.122	-5.4739		No
PCRP_PhaseII	23561	SMAD2	'1B10	K562	27.32		22512716	87.4938	19.2523	8733		4			2.14691	0.193137			2.42779	-0.741691	0.150087	-2.00439	-3.93359	-0.985395			2.60745	-3.72706	NaN	0.103236	-0.8405	NaN	-1.07691	-2.28184	-3.64741		Yes
PCRP_PhaseIII	26302	ZNF543	'1A8	K562	1.325		16418020	86.2822	28.0423	5292		4			2.33232	0.255235			2.89473	-2.36747	-0.513809	-2.34563	-2.57724	-1.01073			2.87649	-2.17759	NaN	-1.71949	-0.800872	NaN	-0.986644	-2.16175	-2.23361		Yes
PCRP_PhaseII	23830	ZNF543	'1A8	K562	1.325		21034792	85.7725	29.0276	2340		4			1.59616	0.094771			2.58701	-2.54921	-1.03781	-2.13137	-2.60002	-0.158769			2.58736	-2.66953	NaN	-1.18299	-0.461143	NaN	-0.121795	-1.21094	-2.13246		Yes
PCRP_PhaseII	22944	DRAP1	'1A12	K562	22.36		27374536	87.79	16.7409	222		4			-0.142009	0.690053			-0.240438	-1.67072	-0.941936	2.92119	-1.83634	0.692233			-0.350431	-2.36464	NaN	-0.501247	0.281031	NaN	2.72071	-0.856702	-1.64748		Yes
PCRP_PhaseI	17439-22047	ZBTB2	'46F2	MCF7	16.46		1880250	83.733	54.087	3		3			0.605871	1.56672			0.742719	-0.466641	0.37284	2.44888	-0.084683	-0.021388			0.670986	0.0630986	0.848879	-0.469328	0.0878847	-0.118052	2.04553	-0.390976	-0.0632876		No
PCRP_Phase0	17363	NRF1	'3H1	K562	17.895		655925	67.7149	83.1339	78		3			3.0248	1.02463			1.16198	-0.379922	-0.775816	-0.00827265	0.0036474	0.0981969			0.155506	1.64203	NaN	-0.653056	-0.737855	NaN	-1.28746	0.280771	0.355954		Yes
PCRP_Phase0	18095	NRF1	'3H1	K562	17.895		2126056	72.8616	79.7997	22		3			1.76719	0.656866			-0.239392	-0.209363	-0.910304	-0.0546999	0.286865	0.353317			-0.956397	1.93094	NaN	-0.518413	-1.13997	NaN	-1.50583	0.526292	0.569461		Yes
PCRP_PhaseIII	26301	MEF2D	'3A4	K562	2.115		23108659	84.8077	19.9203	5004		3			2.0514	0.402931			2.59432	-2.71698	-0.114122	-1.72991	-2.88489	-0.479419			1.69136	-2.80092	NaN	-1.70679	0.474785	NaN	-0.18857	-1.98461	-2.70543		Yes
PCRP_PhaseII	22195	MEF2D	'3A4	K562	2.115		20230328	82.8481	20.6114	3604		3			1.69698	0.256629			2.07575	-1.4346	-0.00765961	-0.764414	-1.3125	-0.209239			1.15667	-1.45883	NaN	-0.895774	0.422954	NaN	-0.0784165	-1.42036	-1.1421		Yes
PCRP_PhaseII	24062	SIX5	'2H4	K562	2.705		19700797	87.4511	18.0503	58		3			0.707583	0.611038			0.739146	-1.13876	-0.311919	1.51613	-1.18122	0.425364			0.857584	-1.90765	NaN	-0.332793	0.234095	NaN	1.61947	-1.03097	-1.20053		Yes
PCRP_PhaseIII	26154-28309	GABPA	'2G3	K562	19.04		3990247	65.6434	80.3251	1674		3			3.43468	0.724021			-0.351046	-0.211842	-1.06831	-0.305673	0.180121	0.417955			-0.917494	2.00277	NaN	-0.513338	-1.28595	NaN	-1.99601	0.60789	0.526427		Yes
PCRP_PhaseIII	28421	GABPA	'2G3	liver	unknown		15974746	80.1124	36.5257	64		3			0.134538	-0.199746			1.83738	-0.662922	-0.605997	-1.60546	-0.271861	-0.291042			2.03138	-0.49124	0.364619	-0.666877	0.0588583	-0.514075	-0.261232	-0.0460827	-0.661007		Yes
PCRP_PhaseII	23860	ATAD2	'2E5	K562	33.66		24260675	85.7791	16.1395	1144		3			1.2763	0.150427			1.8162	-1.27782	-0.122421	-1.80532	-3.08132	0.105763			2.13812	-3.07162	NaN	-0.117709	-0.174157	NaN	-0.115533	-1.62303	-2.8902		Yes
PCRP_PhaseIII	26153	GTF2H2C	'2C9	K562	42.265		10900111	53.4519	50.4925	1200		3			1.31378	0.256326			1.7569	-1.37631	-0.326801	-1.47914	-1.50033	0.173784			1.98684	0.411296	NaN	-0.656052	-0.527091	NaN	-0.434254	-0.235009	-1.42181		Yes
PCRP_PhaseI	18741	NR2C1	'2C3	HepG2	37.885		22801390	66.4938	57.5335	1681		3			0.442136	0.0536734			1.60727	-0.142779	0.821469	0.0296168	-0.325404	-0.419321			1.59049	-0.745372	2.15792	0.0974602	0.172393	NaN	1.28033	-0.1812	-0.493296		Yes
PCRP_PhaseII	23549	ZNF438	'1H5	K562	0.405		21793759	88.9016	22.3956	6635		3			2.00678	0.120734			2.55089	-1.83754	0.246316	-2.30504	-3.19585	-0.814916			2.77359	-3.36494	NaN	-0.836005	-0.707988	NaN	-0.995376	-2.01487	-3.19013		No
PCRP_PhaseI	18764	ZNF556	'1G1	HepG2	2.985		15764014	67.3821	59.2298	3361		3			0.772428	0.142995			1.59612	-0.451615	1.22139	-0.31178	-0.617048	-0.360746			1.92669	-0.494969	2.04941	-0.307447	0.425636	NaN	0.622759	-0.145268	-0.507461		Yes
PCRP_PhaseI	18366	DCP2	'1D6	K562	19.385		13530181	70.7582	61.709	1120		3			1.63627	0.537984			1.69584	-0.754593	-0.0824868	-0.52042	-0.518642	-0.172672			1.60475	0.245802	NaN	-0.543291	-0.297224	NaN	-0.204848	-0.712458	-0.322395		Yes
PCRP_PhaseII	24066-24404	USF1	'1B8	K562	32.875		9909896	80.6152	67.5561	13919		3			3.1349	0.827209			0.731435	-0.656478	0.393134	0.739119	0.373114	-0.174503			0.0885449	1.12998	NaN	-0.969026	-0.184903	NaN	-0.260444	-0.317479	0.495295		Yes
PCRP_Phase0	18097	USF1	'1B8	K562	32.875		1754514	79.06	77.8371	216		3			2.0201	0.704933			-0.0365489	-0.233823	-0.559968	0.179963	0.312139	0.249232			-0.807791	1.79205	NaN	-0.508483	-0.9076	NaN	-1.23032	0.367315	0.591194		Yes
PCRP_PhaseII	22961-23075	USF1	'1B8	K562	32.875		5410918	86.319	61.3217	9073		3			2.92139	0.674696			0.579264	-0.699988	0.504494	0.748798	0.329405	-0.161775			-0.184444	1.17986	NaN	-1.10246	-0.105857	NaN	-0.264036	-0.359964	0.467011		Yes
PCRP_PhaseII	23540-23911	USF1	'1B8	K562	32.875		10415601	87.4041	35.0876	10478		3			2.76136	0.541989			1.08582	-0.953595	0.774397	0.861607	0.254795	-0.493695			0.428167	0.519066	NaN	-1.26501	0.176973	NaN	0.118012	-1.2613	0.26943		Yes
PCRP_PhaseII	23590-23939	USF1	'1B8	K562	32.875		11682453	84.9946	44.5931	12132		3			2.4561	0.427833			1.19466	-1.04208	0.838584	0.933082	0.118609	-0.557142			0.464713	0.385677	NaN	-1.44255	0.264391	NaN	0.158892	-1.19865	0.0938014		Yes
PCRP_PhaseII	22985-23088	USF1	'1B8	K562	32.875		15400767	87.657	35.0412	11100		3			1.82683	0.179191			0.94299	-0.897637	0.727285	0.606113	0.0991447	-0.333383			0.287964	0.557793	NaN	-1.13677	0.211209	NaN	-0.0163466	-1.22268	0.151095		Yes
PCRP_Phase0	17371	USF1	'1B8	HepG2	20.32		1098452	56.3593	71.47	634		3			1.6599	0.0441817			1.32302	-0.784203	0.344008	0.113798	-0.118859	0.04252			2.12327	-0.0287647	0.71565	-0.899801	-0.128878	NaN	-0.360241	-0.131877	0.0772143		Yes
PCRP_PhaseI	18763	SFMBT2	'1B7	HepG2	0.01		21963635	63.8341	58.3104	1527		3			0.493063	0.121084			1.73846	-0.201706	0.808081	-0.291275	-0.25694	-0.441702			1.76821	-0.749866	2.07786	-0.0288011	0.260452	NaN	1.0253	-0.122272	-0.442607		No
PCRP_Phase0	18098	YY1	'1B2	K562	27.435		32417246	84.0926	68.5071	15403		3			1.71838	0.716378			1.3018	-0.30915	0.190454	0.378602	-0.290151	-0.347615			1.21347	0.471927	NaN	-0.334457	-0.331158	NaN	-0.0164816	-0.330617	-0.104673		Yes
PCRP_PhaseII	22179-22777	ZZZ3	'1B11	K562	19.625		20651854	86.4185	25.5232	3097		3			1.57931	0.142184			1.88722	-0.555194	0.0653538	-0.78471	-0.701876	-0.489272			1.94695	-0.311918	NaN	-0.204543	-0.429005	NaN	-0.767678	-1.43241	-0.520527		Yes
PCRP_Phase0	18110	PAX2	'1A7	MCF7	0.025		749798	83.3364	73.2985	1		3			0.848486	1.68999			0.333198	-0.479561	-0.292192	1.22572	-0.168189	0.154255			0.239625	0.286098	-0.315127	-0.421961	-0.371476	-0.0903622	0.710296	0.0475116	-0.129808		Yes
PCRP_PhaseIII	26147	FOS	'1A7	K562	2.825		16883208	74.1201	28.2123	3218		3			1.81046	0.263643			1.8094	-0.416241	0.15838	-1.44969	-2.39227	-0.3861			2.14636	-1.37802	NaN	0.335544	-0.568993	NaN	-0.583236	-1.56397	-2.31477		No
PCRP_Phase0	17380	GRHL2	'1A6	MCF7	46.375		32180471	74.9066	52.2783	25199		3			1.10032	0.365922			1.73147	-0.289248	0.932125	0.678873	0.133161	-0.152213			1.64573	-0.243803	0.590378	-0.327747	0.553975	-0.160014	0.602656	-0.42995	0.0199289		Yes
PCRP_PhaseI	17423-22033	YY1	'1A5	MCF7	58.11		3957925	87.544	51.2533	49		3			1.68548	0.478191			1.94525	-0.30205	0.37208	0.612356	0.107021	-0.0874042			1.90983	-0.0727415	0.159338	-0.316845	0.117647	0.116831	0.347605	-0.510792	-0.000815183		Yes
PCRP_PhaseIII	26287	DRAP1	'1A12	K562	22.36		24109563	86.7812	15.9368	38		3			0.0405985	0.58689			-0.525374	-1.4156	-1.10798	1.99176	-1.89631	0.799192			-0.0149656	-2.48112	NaN	-0.27729	0.356871	NaN	2.18506	-1.09223	-1.70078		Yes
PCRP_Phase0	18117	GRHL2	'1A6	MCF7	46.375		27949927	81.3531	65.7085	30454		2			0.933812	0.256607			1.53867	-0.26827	0.943943	0.594305	0.158344	-0.135236			1.40314	-0.17284	0.76249	-0.352536	0.556688	-0.16748	0.529595	-0.317812	-0.0297719		Yes
PCRP_Phase0	18118	NRF1	'3H1	MCF7	9.825		8060670	78.3281	74.0734	3688		2			1.35183	0.170905			1.91225	-0.332027	0.175482	0.242388	-0.032735	-0.0362166			1.80225	0.0374588	0.633487	-0.380222	0.011607	-0.0430748	0.277771	-0.0132754	-0.157381		Yes
PCRP_PhaseIII	26157-28312	NRF1	'3H1	K562	17.895		4402681	63.2549	76.215	1057		2			1.95596	0.27415			0.543138	-0.263748	-0.808077	-0.328719	0.0756251	0.253115			-0.320054	1.78878	NaN	-0.521496	-0.910048	NaN	-1.70441	0.394183	0.441979		Yes
PCRP_PhaseI	18400	EHMT2	'3D9	K562	24.33		13198317	81.7631	57.7004	367		2			1.57361	0.586156			1.27118	-0.413542	-0.0504357	0.0694257	-0.158948	-0.151679			1.25002	0.626293	NaN	-0.371407	-0.395144	NaN	-0.182418	-0.611364	0.0607187		Yes
PCRP_PhaseIII	26452	ZNF189	'3C5	K562	3.275		18958269	84.4448	20.2899	567		2			0.472601	0.239338			0.0536067	0.172649	-0.0804589	-0.236813	-1.95266	0.110254			0.4822	-1.98443	NaN	0.899231	-0.0390324	NaN	0.342845	-1.42939	-1.74476		Yes
PCRP_PhaseI	18435	ING4	'3B3	MCF7	34.7		6174047	60.3576	64.6274	34		2			0.182432	-0.139263			0.382972	-0.182611	0.636701	0.08521	0.0814653	-0.0207838			0.353825	0.0273098	0.412719	-0.224631	0.417042	-0.378113	-0.00874463	-0.188879	-0.0744731		Yes
PCRP_PhaseII	22213-22800	GABPA	'2G3	K562	19.04		10074904	86.4648	52.7612	1355		2			2.19894	0.132149			0.621071	-0.191907	-0.820643	-0.141594	0.107154	0.192446			0.16623	1.67734	NaN	-0.395631	-0.852452	NaN	-1.43881	-0.0398848	0.432316		Yes
PCRP_PhaseIII	26459	THAP5	'2D4	K562	9.285		16745036	85.4668	23.1214	1425		2			1.28007	0.380856			1.80152	-1.47506	-0.0885646	-0.750917	-1.59587	0.0816893			1.11168	-1.44721	NaN	-0.676754	0.394143	NaN	0.138788	-1.09292	-1.51197		Yes
PCRP_PhaseII	23837-24493	ZFAT	'2D2	K562	1.085		3220659	81.076	73.5637	145		2			1.93739	0.0837007			-1.08093	-0.104791	-0.84423	0.0184558	0.360867	0.366247			-1.46752	1.97245	NaN	-0.431859	-1.21702	NaN	-1.47427	0.482127	0.63759		Yes
PCRP_PhaseII	22605-23050	ZNF81	'2C7	K562	3.795		23775002	81.8606	31.604	346		2			0.371231	0.443654			0.31399	-0.187681	0.00904972	1.46067	-0.864331	0.0819628			0.741854	-0.343427	NaN	0.22924	-0.0840117	NaN	1.18254	-1.5666	-0.547351		Yes
PCRP_PhaseIII	26430	ZMYM3	'2B9	K562	13.675		22680338	88.4443	25.1073	2174		2			0.15803	0.186258			0.278325	-0.506737	0.760055	0.463078	-1.21862	-0.0850031			0.502774	-1.15224	NaN	-0.300119	0.36375	NaN	0.36154	-1.02569	-0.751177		Yes
PCRP_PhaseI	18365	MLLT3	'2B6	K562	0.17		29698580	71.8583	49.1925	2183		2			1.38947	0.475644			1.67445	-1.08246	-0.159777	-0.709067	-1.17771	0.0639764			1.75016	-0.876989	NaN	-0.467082	-0.102203	NaN	0.242149	-0.761571	-1.00021		Yes
PCRP_PhaseI	18310	PLAG1	'1F5	HepG2	4.825		45438472	72.4782	64.4487	9879		2			0.429	0.0949877			1.25141	0.437342	0.58323	-0.0360982	0.174172	-0.788884			1.32543	-0.873237	1.41498	0.568312	0.112073	NaN	1.13171	-0.543868	-0.363607		Yes
PCRP_PhaseI	18417	SRRT	'1F5	MCF7	73.99		10961759	75.4094	58.2566	24		2			-0.152403	-0.117964			0.0378191	-0.0298553	0.709848	0.0801529	0.0385092	-0.0750164			0.249577	-0.110634	0.175715	-0.120361	0.478932	-0.00939614	-0.0531034	-0.335798	0.0379155		Yes
PCRP_PhaseI	19061	HOXB2	'1F2	K562	9.94		24303039	85.5436	60.0855	1406		2			-0.22476	0.341343			-0.657208	-0.628137	-0.221676	1.06605	0.718115	0.270603			-1.65456	0.550379	NaN	-1.09874	0.0219522	NaN	0.687552	0.623742	0.554627		Yes
PCRP_PhaseI	19144	HOXB9	'1E6	K562	NaN		14929326	82.6051	41.1942	1452		2			0.618631	0.279178			0.782597	-0.168824	-0.0130731	1.16255	0.394894	-0.268722			0.265146	1.08976	NaN	-0.645004	-0.342534	NaN	0.558751	-0.588549	0.502675		Yes
PCRP_PhaseI	18370	NFKB2	'1E1	K562	5.42		7579977	71.8234	62.8744	151		2			1.57232	0.526181			0.839558	-0.303806	-0.319236	0.0332699	0.0890804	0.0433015			0.760785	1.1872	NaN	-0.331414	-0.603415	NaN	-0.560116	-0.326948	0.343751		Yes
PCRP_PhaseII	23571	ELK1	'1D9	K562	17.195		20574616	81.7864	20.1527	859		2			1.07012	0.246289			1.6855	-1.35546	0.287644	-0.566559	-1.42752	-0.0535541			1.47399	-1.56073	NaN	-0.755639	0.255056	NaN	0.383173	-1.16316	-1.36518		Yes
PCRP_PhaseI	18740	BCL6	'1D3	HepG2	37.06		18809630	62.7046	61.1843	2396		2			0.405326	0.0784936			1.46428	-0.35688	1.27528	0.438211	-0.278024	-0.446883			1.78243	-0.78176	1.65613	-0.272792	0.607444	NaN	1.31695	-0.261364	-0.33086		Yes
PCRP_PhaseIII	26323	HDAC7	'1C4	K562	20		20343585	83.9403	24.1465	2091		2			1.28155	0.167438			1.22461	0.219299	0.195503	-0.917872	-2.24902	-0.470803			1.63292	-1.94116	NaN	0.799213	-0.415093	NaN	-0.468461	-1.87521	-1.92971		Yes
PCRP_PhaseII	23581	HDAC7	'1C4	K562	20		19936122	80.6823	22.4948	891		2			1.15161	0.100806			1.31289	-0.274993	0.124807	-0.732951	-1.90316	-0.126781			1.68024	-1.87583	NaN	0.405935	-0.212733	NaN	-0.19401	-1.49263	-1.55375		Yes
PCRP_PhaseI	19022	USF1	'1B8	K562	32.875		2210155	60.4785	92.1238	990		2			1.45753	0.655066			-1.06001	-0.20845	-0.871517	-0.0433244	0.323588	0.422598			-1.67752	2.01061	NaN	-0.530602	-1.27833	NaN	-1.58825	0.670438	0.616141		Yes
PCRP_PhaseII	23566-23925	USF1	'1B8	K562	32.875		4193283	84.6936	64.0924	3164		2			2.56644	0.575474			0.0235301	-0.370579	0.0536833	0.370335	0.34239	0.0905207			-0.677868	1.59378	NaN	-0.711455	-0.483576	NaN	-0.806329	0.00123031	0.530139		Yes
PCRP_PhaseII	22635-23062	USF1	'1B8	K562	32.875		13314997	82.1876	53.4765	20506		2			2.4617	0.498177			0.6749	-0.551167	0.481934	0.692837	0.332527	-0.249339			0.0257439	0.979153	NaN	-0.849168	-0.0585918	NaN	-0.105362	-0.662376	0.40917		Yes
PCRP_PhaseII	22202-22792	USF1	'1B8	K562	32.875		7793073	81.471	51.2935	4665		2			1.97827	0.436314			0.239992	-0.368267	0.219812	0.523077	0.356501	-0.0451824			-0.400884	1.32497	NaN	-0.628547	-0.295912	NaN	-0.431576	-0.356979	0.523354		Yes
PCRP_PhaseII	22226-22812	USF1	'1B8	K562	32.875		6962017	86.8829	50.6664	3950		2			2.01048	0.356151			0.347799	-0.384454	0.205395	0.385969	0.330246	-0.045521			-0.242468	1.38934	NaN	-0.704627	-0.331633	NaN	-0.622027	-0.351971	0.511967		Yes
PCRP_PhaseII	22885-23334	USF1	'1B8	K562	32.875		9532888	89.3529	59.5689	4245		2			1.67269	0.214888			0.284649	-0.440683	0.0690586	0.159496	0.316671	0.071926			-0.352366	1.45936	NaN	-0.692021	-0.42036	NaN	-0.825595	-0.0133282	0.508517		Yes
PCRP_PhaseIII	28423-28675	USF1	'1B8	kidney	unknown		25629779	80.5509	37.9642	6018		2			0.638574	0.0758444			0.988831	-0.0590942	0.817561	-0.042432	-0.398851	-0.36154			0.948745	0.251949	-2.30714	-0.358736	0.117095	-0.122711	-0.867436	-1.32421	-0.0554306		Yes
PCRP_PhaseI	18324	SFMBT2	'1B7	HepG2	0.01		38797954	68.5184	69.0994	7757		2			0.255242	-0.0408565			1.0838	0.384144	0.33817	-0.183264	0.145916	-0.574187			1.14598	-0.682111	1.07225	0.493267	0.0684472	NaN	1.01266	-0.30547	-0.277013		Yes
PCRP_PhaseI	18951	SHARPIN	'1A8	K562	15.26		310616	80.0441	23.554	3		2			0.363531	0.12652			-1.68955	-0.505631	-1.16635	1.12475	-0.566287	0.672732			0.272202	0.433081	NaN	-0.267656	-0.741291	NaN	1.83329	0.500037	0.551552		No
PCRP_PhaseI	18966	FOS	'1A7	K562	2.825		354630	86.11	17.6858	3		2			1.90072	0.636168			1.73788	-0.563636	-0.101501	-0.0327885	-2.72383	-0.128665			1.50924	-0.11124	NaN	0.0124515	-0.0376844	NaN	-1.38911	-2.72236	-1.2558		No
PCRP_PhaseI	19069	FOS	'1A7	K562	2.825		8045455	86.096	72.7341	377		2			1.80101	0.556206			0.840843	0.0160029	-0.302091	0.0887297	-0.120658	-0.113048			0.747	1.219	NaN	-0.0130143	-0.821985	NaN	-0.811923	0.142862	0.118364		Yes
PCRP_PhaseI	18437	ETV6	'1A7	MCF7	2.68		5520051	53.4344	63.204	8		2			-0.00186667	-0.117467			0.278501	-0.0491387	0.715441	0.296871	0.128804	-0.0833767			0.508187	-0.0370393	0.205155	-0.174079	0.462235	0.0539909	-0.116773	-0.644681	0.032652		Yes
PCRP_Phase0	17366	GRHL2	'1A6	K562	0		17344241	82.884	41.1961	1491		2			1.52337	0.694658			1.83629	-1.16061	0.356466	0.190252	-1.70342	-0.272554			1.76533	-1.40723	NaN	-0.630709	0.0625514	NaN	0.45912	-1.21628	-1.4867		No
PCRP_Phase0	18109	GRHL2	'1A6	MCF7	46.375		10053531	87.9618	72.4297	23006		2			0.952568	0.241927			1.17962	-0.340659	0.779359	0.350142	0.104217	-0.0357301			1.07365	-0.0017272	0.673463	-0.41978	0.424872	-0.0626634	0.16397	-0.167201	-0.0780277		Yes
PCRP_PhaseII	23503-23874	HDAC6	'1A4	K562	67.73		22524787	83.1894	18.8099	1349		2			0.942325	0.138669			0.885208	0.0765112	-0.107092	-1.5617	-2.66778	0.00063533			1.33093	-2.35694	NaN	0.825388	-0.22785	NaN	-0.00873981	-1.57614	-2.34368		Yes
PCRP_PhaseI	17413	ESR1	'1A12	MCF7	53.62		33160097	86.4227	33.3314	11975		2			0.557886	0.147223			0.82676	-0.264398	0.903918	0.251972	0.0102363	-0.0470213			0.724447	-0.167529	0.705748	-0.342873	0.631093	-0.178915	0.295493	-0.408849	0.0809963		Yes
PCRP_PhaseIII	26325-28259	USF2	'1A11	K562	40.44		16826314	87.8001	42.3325	8715		2			1.70852	0.312309			0.599812	-0.345512	0.294339	0.591595	0.0211039	-0.129487			0.0731546	1.09966	NaN	-0.542273	-0.158771	NaN	-0.114824	-0.618948	0.219378		Yes
PCRP_PhaseII	22624	MEIS2	'1A11	K562	11.235		17565159	87.3339	44.7145	2503		2			0.0742553	0.09386			0.180117	-0.728023	1.06022	0.331985	-0.829321	-0.263933			-0.357205	-0.199025	NaN	-0.797228	0.486756	NaN	0.303716	-0.74844	-0.690039		Yes
PCRP_PhaseIII	26150-28307	ZNF143	'1A10	K562	34.97		24953519	66.2107	41.4152	7229		2			2.66105	0.512762			1.51357	-0.939256	-0.0094865	0.0478215	-0.833575	0.00915411			0.919743	-0.0805239	NaN	-0.677535	0.213435	NaN	0.202271	-1.05683	-0.609871		Yes
PCRP_PhaseI	18932	CTBP1	'1A1	K562	43.21		100200	78.7681	24.677	3		2			0.110173	0.0228786			NaN	NaN	NaN	NaN	NaN	1.31428			3.5576	NaN	NaN	NaN	NaN	NaN	NaN	NaN	NaN		No
PCRP_Phase0	15396	GRHL2	'1A6	MCF7	46.375		46539814	84.2976	33.7764	20578		1			0.421649	-0.0647872			0.921436	-0.332491	0.386766	-0.0772259	-0.119256	0.0553295			0.837271	0.0279179	-0.195114	-0.307637	0.154283	-0.0303665	-0.183351	-0.135273	0.0381475		Yes
PCRP_Phase0	18105	USF1	'1B8	K562	32.875		332248	69.5653	80.0727	0		1			1.821	0.58512			-0.683674	-0.142124	-0.924993	-0.00892737	0.292499	0.376322			-1.30476	1.95415	NaN	-0.427039	-1.23506	NaN	-1.44539	0.576073	0.600315		No
PCRP_Phase0	18100	FOXM1	'2E6	K562	7.59		462959	84.0294	77.3036	-		1			0.776725	0.674719			NaN	NaN	NaN	NaN	NaN	NaN			nan	nan	NaN	nan	nan	NaN	nan	nan	nan		No
PCRP_Phase0	18116	FOXM1	'2E6	MCF7	35.995		14261723	81.9356	71.7309	3596		1			0.571285	0.155488			0.995985	-0.127686	0.182478	0.285349	0.0999546	-0.030934			0.780508	-0.0167994	1.14835	-0.209742	0.0882901	-0.0367599	0.296502	-0.0234125	0.00344972		Yes
PCRP_Phase0	18106	YY1	'1C2	K562	27.435		745830	82.2378	76.7547	0		1			1.05138	1.26738			-1.32384	-0.107216	-0.923114	0.395736	0.320247	0.395783			-1.82094	1.96536	NaN	-0.381908	-1.2852	NaN	-1.08552	0.601607	0.639566		No
PCRP_Phase0	16663	GRHL2	'1A6	MCF7	46.375		10416867	77.9836	65.4338	3962		1			0.0522633	-0.105717			0.286866	-0.210668	0.178012	-0.213241	-0.0968768	0.0716673			0.133684	0.139308	0.320102	-0.17377	-0.00537366	0.0183928	-0.386974	-0.0634525	-0.0684025		Yes
PCRP_Phase0	16655	GRHL2	'1A6	MCF7	46.375		17509479	71.4562	54.1512	2669		1			-0.453793	-0.392077			-0.152319	-0.0555661	0.201035	-0.543447	-0.0901278	0.0292385			-0.098075	0.0515268	-0.571033	0.00547785	0.0272385	0.01393	-0.59528	-0.220595	0.00779977		Yes
PCRP_Phase0	16658	USF1	'1B8	MCF7	20.76		4148078	54.9891	68.1841	28		1			0.0691548	-0.400998			1.35593	-0.118192	0.589635	-0.0461654	-0.130464	-0.0804844			1.37947	0.0790887	-1.13788	-0.207348	0.309577	-0.0859538	-0.381807	-0.447609	-0.225143		Yes
PCRP_Phase0	15413	USF1	'1B8	K562	32.875		2279559	64.4109	73.8981	190		1			0.596337	-0.514507			0.110528	-0.706346	-0.414997	-0.172342	0.045085	0.415294			-0.820022	1.99247	NaN	-1.05373	-0.902677	NaN	-1.4916	0.625814	0.345839		Yes
PCRP_Phase0	15401	ATF2	'1B4	K562	68.935		2905252	70.3721	72.9082	57		1			0.358396	-0.523452			-0.510363	-0.406723	-1.17951	-0.767726	-0.0689948	0.563283			-1.46559	2.14916	NaN	-0.708887	-1.38747	NaN	-2.29383	0.874493	0.33132		Yes
PCRP_Phase0	15409	Smad4	'1H2	K562	38.35		9853960	77.7959	29.6167	2		1			-0.149055	-0.956936			-0.766713	-0.612546	-0.991981	1.04758	0.0727523	0.562206			-0.334787	1.01513	NaN	-0.389218	-0.484342	NaN	0.489333	0.963437	0.0820662		No
PCRP_Phase0	15408	NFE2L2	'1D12	K562	65.3		6556712	79.8524	34.6169	0		1			-0.356574	-1.13689			-1.60241	-0.675656	-1.14961	-1.59547	0.520846	0.630582			-1.04366	1.19384	NaN	-0.583519	-0.62906	NaN	-1.35704	1.30971	0.513223		No
PCRP_PhaseII	22879	DAXX	'6E9	K562	17.085		20047909	80.0267	26.8375	86		1			0.348115	0.0509376			-0.142859	-0.903977	-0.951549	-0.927598	-0.763586	0.689962			0.111348	-0.485634	NaN	-0.213411	0.237927	NaN	0.602892	-0.288848	-0.54116		Yes
PCRP_PhaseI	18629	RXRG	'5G6	K562	0		22643465	82.5499	69.5969	434		1			0.842943	0.318245			0.65618	-0.238155	-0.215252	0.208942	0.0378546	0.0397187			0.297287	0.934408	NaN	-0.318097	-0.339558	NaN	-0.0412376	0.107709	0.202013		Yes
PCRP_PhaseIII	28261	RXRG	'5G6	K562	0		50536939	86.0168	18.9432	20		1			-0.00832458	0.100536			-1.02924	-0.922288	-1.18182	-1.16741	-1.36541	0.828683			-0.401646	-2.28044	NaN	0.106425	0.421826	NaN	0.791638	-0.724776	-1.10307		Yes
PCRP_PhaseII	22874	RXRG	'5C9	K562	0		25262535	83.9912	19.1402	15		1			-0.0982661	-0.00538972			-1.05871	-1.27498	-1.85149	-1.99037	-1.27769	0.942581			-0.570099	-1.36926	NaN	-0.105871	0.410255	NaN	1.08601	-0.518342	-0.997342		Yes
PCRP_PhaseII	22972-23080	STAT1	'4H11	K562	14.985		32516926	87.7923	19.8998	2		1			-0.2821	-0.132223			-1.05332	-0.370275	-0.863555	-0.589523	-0.393037	0.583259			-0.509123	-0.25714	NaN	0.140209	0.196608	NaN	0.310537	-0.987416	-0.170452		Yes
PCRP_PhaseII	24022-24384	HMX3	'4E5	K562	1.23		29896290	89.0567	25.186	17		1			0.498269	0.378056			0.466654	-0.498546	-0.00858058	0.367916	-0.384833	0.195184			0.563371	-0.294286	NaN	-0.162489	0.119525	NaN	0.559814	-1.03546	-0.252437		Yes
PCRP_PhaseII	23528-23899	ZNF230	'4B6	K562	1.885		21499224	85.5737	16.9794	2		1			0.16294	0.0651813			-0.636804	-1.16322	-0.79923	-0.623602	-1.33667	0.791675			0.172354	-1.84152	NaN	-0.0652205	0.381745	NaN	0.886819	-1.02521	-0.9737		Yes
PCRP_PhaseII	23496-23867	MAT2B	'4B6	K562	NaN		22588246	86.744	15.9857	2		1			0.166782	0.0536494			-0.517645	-1.14623	-0.69982	-1.13733	-1.10255	0.758094			0.0631855	-1.45996	NaN	-0.15013	0.403358	NaN	0.830061	-0.910613	-0.980494		Yes
PCRP_PhaseII	23856	THAP7	'3H4	K562	52.575		20551404	77.6823	25.7079	89		1			0.325153	0.0157797			0.027451	-0.931449	-0.55489	-0.823212	-0.796395	0.61106			0.396377	-0.978173	NaN	-0.13977	0.262492	NaN	0.625465	-0.674491	-0.628472		Yes
PCRP_PhaseIII	28425-28676	NRF1	'3H1	kidney	unknown		15234315	61.371	45.4489	3784		1			0.72758	0.0430698			1.29767	-0.151288	0.575729	-0.533796	-0.355356	-0.47224			1.25849	0.0480745	-1.22411	-0.389171	-0.0188535	-0.388087	-0.81701	-1.61923	-0.0376985		Yes
PCRP_PhaseII	22856	NRF1	'3H1	K562	17.895		16018593	83.3623	26.9702	334		1			0.599674	-0.0124652			1.61531	-1.51292	-0.838778	-1.28464	-1.43652	0.392624			1.00377	-1.05471	NaN	-0.653818	0.331313	NaN	0.304854	-0.804273	-1.07296		Yes
PCRP_PhaseII	22958	JUNB	'3G11	K562	NaN		19981399	79.5881	26.2928	94		1			0.683005	0.320922			0.736215	-1.01301	0.214305	0.441635	-1.12082	0.269664			0.883242	-1.15475	NaN	-0.435636	0.277232	NaN	0.754349	-0.908822	-0.877485		Yes
PCRP_PhaseII	23511-23882	RCOR2	'3F4	K562	1.835		16971082	85.8701	25.0948	14		1			0.197034	0.0306759			-0.0767897	-0.348186	-0.190192	0.0594368	-0.201987	0.290439			0.00493152	0.343202	NaN	-0.0447319	0.040485	NaN	0.182353	-0.986201	-0.00417809		Yes
PCRP_PhaseI	19005	NKX2-5	'3F2	K562	0		9611502	54.7612	85.0243	1214		1			0.454388	0.212487			-1.32266	-0.210949	-1.03178	0.019972	0.200827	0.485822			-1.79391	2.0478	NaN	-0.479402	-1.36712	NaN	-1.26365	0.756768	0.508637		Yes
PCRP_PhaseI	17421-22032	SOX4	'3F12	MCF7	28.355		10433016	82.0433	46.7437	3		1			0.408719	0.168677			0.503251	-0.0612589	0.280588	0.304686	0.168882	-0.0356718			0.49554	-0.0567712	0.0735667	-0.0622523	0.154047	0.0885949	0.126034	-0.406561	0.0876638		Yes
PCRP_PhaseIII	26156-28311	STAT5B	'3E9	K562	100.71		13403704	51.6377	56.2543	431		1			0.54488	0.0743045			0.25512	-0.507565	0.0226098	-0.281079	-0.357861	0.248585			0.0361772	0.721215	NaN	-0.322532	0.0290492	NaN	-0.307789	-0.613732	-0.0660959		Yes
PCRP_PhaseII	22208	STAT5B	'3E9	K562	100.71		18273710	83.7975	21.8742	66		1			0.38662	0.0201243			0.610091	-1.32016	-0.454445	-1.14409	-1.34036	0.602103			0.473581	-0.809287	NaN	-0.337512	0.3319	NaN	0.53751	-0.588739	-1.01885		Yes
PCRP_PhaseII	23779-24104	ZNF134	'3E11	K562	3.76		19024682	84.5218	20.1315	46		1			0.336336	0.163174			-0.0120081	-0.687103	-0.565802	-0.0271753	-0.384637	0.511808			0.249885	-0.547858	NaN	-0.100461	0.186492	NaN	0.6792	-0.845313	-0.269675		Yes
PCRP_PhaseII	23577-23931	POLE3	'3D3	K562	85.28		22362819	75.9538	27.0085	163		1			0.52364	0.162872			0.654837	-1.01578	-0.493003	-0.640782	-1.17982	0.528461			0.661573	-0.762868	NaN	-0.2498	0.260014	NaN	0.644811	-0.828073	-0.937714		Yes
PCRP_PhaseI	17438-22046	RFX6	'3D3	MCF7	0.025		5744086	73.4907	55.8158	9		1			0.288627	0.137737			0.373643	-0.106931	0.365834	0.151665	0.150133	-0.0154613			0.451042	0.0118788	0.0187265	-0.116211	0.211531	-0.0195435	-0.212599	-0.477152	0.0477312		Yes
PCRP_PhaseII	24044	SCAND1	'3D11	K562	4.1		19311097	83.5765	22.0698	12		1			0.616522	0.273827			0.655859	-1.07711	-0.302447	-0.726836	-1.27739	0.504533			0.810304	-1.40758	NaN	-0.33008	0.290617	NaN	0.778667	-0.754584	-1.03307		Yes
PCRP_PhaseI	18284	CEBPB	'3D10	HepG2	21.59		2707546	57.9574	81.6702	1760		1			-0.336108	-0.126007			-1.05347	-0.203099	-0.658855	-0.667874	-0.302225	0.276068			-1.18339	0.411239	-1.18166	-0.249146	-0.335944	NaN	-1.25546	0.445254	-0.0492683		Yes
PCRP_PhaseI	18723	CEBPB	'3D10	HepG2	21.59		1880119	73.1314	68.1696	429		1			-0.278634	-0.142763			-1.23055	-0.148096	-0.548383	-0.826634	-0.522692	0.274074			-0.932131	0.37228	-1.03815	-0.177343	-0.289077	NaN	-1.32013	0.428766	-0.073596		Yes
PCRP_PhaseII	22198	ZXDC	'3D1	K562	5.08		20279242	83.0553	21.9289	149		1			0.577293	0.108889			0.423762	-0.800271	-0.289323	-0.47308	-0.963497	0.462333			0.820573	-1.09667	NaN	-0.0848343	0.187594	NaN	0.407468	-0.793871	-0.740801		Yes
PCRP_PhaseI	19075	PBX1	'3C8	K562	0.155		82746444	78.3217	47.0967	3432		1			0.899833	0.296932			1.43996	-1.028	0.0492963	-0.206776	-1.11678	0.0858736			1.41709	-1.26681	NaN	-0.454221	0.0608814	NaN	0.545527	-0.251038	-1.11397		Yes
PCRP_PhaseIII	26148	PBX1	'3C8	K562	0.155		12476481	52.6921	51.5252	1123		1			0.204269	0.111712			-1.03134	-0.988522	-1.1507	-1.25518	-0.505648	0.789224			-0.250761	1.51009	NaN	-0.600924	-0.425717	NaN	-0.45521	0.653377	-0.358434		Yes
PCRP_PhaseII	23506-23877	PKNOX2	'3C6	K562	0		21254167	83.9605	19.1483	38		1			0.0632419	0.0239716			-0.834429	-1.12772	-0.955092	-1.7709	-1.08557	0.817565			0.000364912	-1.21513	NaN	-0.115578	0.362641	NaN	0.821513	-0.798767	-0.818549		Yes
PCRP_PhaseI	19162	ZNF189	'3C5	K562	3.275		27870339	82.8325	33.078	3468		1			0.705909	0.0304009			0.926125	-0.260075	-0.255005	0.255712	0.289565	-0.0872579			0.641053	0.797452	NaN	-0.47958	-0.33982	NaN	0.0301153	-0.374154	0.47269		Yes
PCRP_PhaseII	23501-23872	TADA2A	'3C4	K562	NaN		22121998	82.4903	21.0295	65		1			0.373021	0.131042			0.158268	-1.04419	-0.553238	-1.08832	-1.05237	0.634665			0.448467	-1.00313	NaN	-0.188579	0.289742	NaN	0.654348	-0.721607	-0.783851		Yes
PCRP_PhaseI	19089	ZBTB48	'3C4	K562	NaN		18766762	82.4504	46.7266	55		1			-0.210988	-0.192134			-0.513736	-0.331326	-0.853358	-0.890579	-0.433227	0.531869			-0.679521	0.855493	NaN	-0.182002	-0.0677255	NaN	0.1875	0.210681	-0.283821		Yes
PCRP_PhaseII	22854	ZNF704	'3C10	K562	NaN		17279364	79.6452	28.3016	69		1			0.107111	-0.0188621			-0.599306	-1.12434	-1.11627	-1.60944	-1.19894	0.824118			-0.190218	-0.562448	NaN	-0.149896	0.313806	NaN	0.751739	-0.269044	-0.988643		Yes
PCRP_PhaseII	23844	ZNF341	'3B10	K562	0.83		24638727	85.6795	16.4287	34		1			0.151268	0.0706823			-0.531976	-1.60717	-1.30556	-1.10637	-1.52178	0.913408			0.153334	-2.27423	NaN	-0.154233	0.444282	NaN	0.946711	-0.727083	-1.50495		Yes
PCRP_PhaseI	18701	TFCP2	'3B1	K562	18.275		58338001	86.3194	72.4404	8911		1			0.647404	0.340318			0.524774	-0.30609	-0.0570739	0.135844	-0.123301	0.0842643			0.409404	0.337025	NaN	-0.318221	-0.231099	NaN	0.137892	0.823751	-0.167113		Yes
PCRP_PhaseIII	26312	TFCP2	'3B1	K562	18.275		16379717	81.7112	29.311	41		1			-0.0370931	0.0254557			-0.916956	-1.01124	-1.11388	-1.13828	-1.02197	0.814601			-0.371235	-0.471848	NaN	-0.0485967	0.306782	NaN	0.822865	-0.713014	-0.772531		Yes
PCRP_PhaseII	24024	THAP10	'3A9	K562	0.015		25752234	81.7941	21.547	964		1			1.18081	0.561466			1.61903	-1.57717	-0.0736323	-0.141711	-2.52182	0.233006			1.71061	-1.87479	NaN	-0.528641	0.119935	NaN	0.672743	-1.14762	-2.16886		Yes
PCRP_PhaseI	18989	PLXNB1	'3A7	K562	7.055		12816739	77.3872	81.3686	151		1			0.808476	0.570685			-0.309596	-0.161116	-0.642262	0.110424	0.233348	0.293328			-0.683971	1.68696	NaN	-0.348244	-0.899479	NaN	-0.712772	0.477861	0.491359		Yes
PCRP_PhaseI	19160-19549	ESRRG	'3A6	K562	NaN		20315090	81.8572	49.4063	1895		1			0.0781816	-0.169312			-0.956837	0.0379856	-0.637102	0.292754	0.384968	0.228666			-1.24168	1.77133	NaN	-0.267617	-0.945817	NaN	-0.879817	0.252748	0.621664		Yes
PCRP_PhaseII	22877	PRKRA	'3A4	K562	41.265		24283071	80.7086	23.3504	357		1			0.905594	0.146381			1.3258	-1.41835	-0.437942	-1.51607	-2.09163	0.446431			1.46818	-1.35861	NaN	-0.322384	0.111778	NaN	0.363522	-0.733376	-1.54145		Yes
PCRP_PhaseI	18416	BRD1	'2H2	MCF7	5.225		11136759	70.3088	59.6666	40		1			0.0906175	-0.169593			0.417868	-0.0186523	0.712935	-0.129661	0.0176273	-0.0936237			0.643637	-0.109601	0.164681	-0.0734477	0.417493	0.0982143	-0.0792444	-0.285286	-0.0171408		No
PCRP_PhaseII	24038	ZC3H7A	'2G9	K562	19.03		21434581	86.7093	17.9234	2		1			0.582928	0.229494			0.404196	-1.37826	-0.557126	-0.965184	-1.85599	0.688751			0.788513	-2.31518	NaN	-0.233145	0.354456	NaN	0.879026	-0.981636	-1.42904		Yes
PCRP_PhaseII	23525-23896	TGIF1	'2G6	K562	34.33		18993533	76.6609	27.5468	16		1			0.103161	-0.0136355			-0.407201	-0.551145	-0.501349	-0.473663	-0.405711	0.518331			-0.0615388	-0.144586	NaN	-0.14266	0.178429	NaN	0.527891	-0.822299	-0.108417		Yes
PCRP_PhaseIII	28415-28672	GABPA	'2G3	liver	unknown		15216599	83.4065	46.0809	13051		1			1.03529	0.0542179			0.39297	-0.0709194	-0.124357	-0.929699	-0.526414	0.069746			0.508712	0.400433	-4.04451	0.0198676	-0.562568	0.128457	-1.60325	-0.603803	-0.0421231		Yes
PCRP_PhaseIII	28427-28678	GABPA	'2G3	kidney	unknown		26252666	81.4205	39.7752	8257		1			0.573601	0.0119481			0.697266	0.101657	0.197002	-0.321289	-0.191717	-0.174956			0.64713	0.494709	-1.69052	-0.164815	-0.286801	-0.0767054	-1.05132	-1.20106	0.132539		Yes
PCRP_PhaseII	22627	BACH1	'2G3	K562	22.88		29215717	83.6214	29.4164	12		1			-0.0956239	-0.0256147			-0.822964	-1.18732	-1.09779	-0.939403	-1.33582	0.849273			-0.146385	-1.29329	NaN	-0.0941911	0.33617	NaN	0.914272	-0.384213	-0.804451		Yes
PCRP_PhaseII	22982	MEF2B	'2F9	K562	0.125		21088515	81.8811	21.0953	41		1			0.412169	0.096127			-0.118572	-1.38212	-0.835513	-1.00953	-1.60942	0.796771			0.367236	-1.74182	NaN	-0.185919	0.377372	NaN	0.737566	-0.580656	-1.19086		Yes
PCRP_PhaseII	22188	BBX	'2F6	K562	6.885		19107674	84.2165	19.2019	7		1			0.171915	0.0968121			-0.487732	-0.788367	-0.53858	-0.64306	-0.789779	0.631958			0.00652936	-1.30953	NaN	0.00386122	0.311	NaN	0.761009	-0.874629	-0.572352		Yes
PCRP_PhaseII	22613	TEAD4	'2F4	K562	11.815		26472231	84.3226	32.4578	184		1			0.216878	0.209379			0.626673	-1.25038	-0.279317	-0.00528499	-1.30991	0.529859			0.551868	-1.3015	NaN	-0.413497	0.322609	NaN	0.922769	-0.317372	-1.09593		Yes
PCRP_PhaseI	18756	SMAD9	'2F4	HepG2	4.15		8337853	43.5936	77.165	789		1			-0.152732	-0.111004			-0.271491	-0.107583	-0.243433	-0.364002	-0.210394	0.139892			-0.239169	0.104016	-0.355416	-0.145228	0.00794105	NaN	0.309361	0.291446	-0.0567846		Yes
PCRP_PhaseIII	26160-28315	STAT3	'2F12	K562	64.78		8970354	56.2351	63.4777	1105		1			1.40925	0.2378			0.479721	-0.212254	-0.439019	-0.0115074	0.045354	0.153689			0.0125051	1.55203	NaN	-0.36991	-0.67084	NaN	-0.938309	-0.0182724	0.38102		Yes
PCRP_PhaseII	22217-22804	STAT3	'2F12	K562	64.78		25169916	85.0296	25.7538	838		1			0.362823	-0.0488776			0.988618	-0.819791	-0.518435	-1.15578	-0.510993	0.349698			0.59252	-0.103916	NaN	-0.33017	0.1864	NaN	0.180009	-1.16074	-0.330779		Yes
PCRP_PhaseII	24059	HMGN5	'2E6	K562	5.225		19805810	70.2689	32.7908	366		1			0.637662	0.299795			0.349617	-1.03296	-0.42883	-0.532757	-0.951622	0.563868			0.695877	-0.109297	NaN	-0.3591	0.132207	NaN	0.484254	-0.295344	-0.786116		Yes
PCRP_PhaseIII	26317-28258	KLF16	'2E5	K562	2.635		22251761	86.9312	42.9073	8195		1			0.331404	0.46031			-0.0559696	-0.016522	-0.332378	0.940283	-0.113234	0.125352			-0.505755	1.25402	NaN	-0.175747	-0.372407	NaN	0.291545	-0.184749	0.188146		Yes
PCRP_PhaseIII	26319	ATAD2	'2E5	K562	33.66		20533355	85.0988	22.3454	1290		1			1.3611	0.198615			1.70081	-0.780499	0.40219	-1.19138	-2.03693	-0.280935			1.97022	-1.75891	NaN	-0.0571251	-0.15709	NaN	-0.277786	-1.61104	-1.8431		No
PCRP_PhaseI	18928	KLF16	'2E5	K562	2.635		286074	81.1667	22.2129	3		1			0.659981	0.123848			-0.613597	-0.429682	-0.675366	1.2007	-0.490338	0.497142			0.631605	1.60806	NaN	-1.23018	-0.440782	NaN	0.870762	-0.462488	-0.410974		No
PCRP_PhaseIII	26455	MYCL1	'2E1	K562	NaN		18869570	80.0433	23.7825	90		1			0.791212	0.384676			0.783941	-0.844624	-0.121611	-0.166272	-1.31946	0.359991			1.13089	-1.33662	NaN	-0.0790287	0.152354	NaN	0.570325	-1.04213	-1.16697		Yes
PCRP_PhaseI	19153	MYCL1	'2E1	K562	NaN		33270427	80.7134	29.8034	5702		1			0.746168	0.0134756			0.765557	-0.12434	-0.408396	-0.00151408	0.464152	-0.0853294			0.63591	0.917182	NaN	-0.251267	-0.482148	NaN	-0.295095	-0.583627	0.556619		Yes
PCRP_PhaseII	22969	MYCL1	'2D5	K562	NaN		21842375	84.3446	17.8463	7		1			0.320725	0.0776092			-0.298923	-1.19538	-0.984618	-1.55411	-1.40561	0.802959			0.110718	-2.02761	NaN	-0.0272485	0.379217	NaN	0.915074	-0.606878	-1.25843		Yes
PCRP_PhaseII	23827	THAP5	'2D4	K562	9.285		15321158	86.5164	38.8361	439		1			0.586684	0.0529474			1.46915	-0.997783	-0.487582	-0.443531	-0.970184	0.233788			0.333231	-0.656133	NaN	-0.492029	0.336289	NaN	0.375207	-0.310104	-0.711992		Yes
PCRP_PhaseII	23768-24093	E4F1	'2D1	K562	16.215		19317749	85.956	17.9404	100		1			0.0677617	0.073365			-0.553891	-0.695021	-0.497746	-0.662424	-0.118247	0.544718			-0.242261	-0.586756	NaN	-0.205727	0.282313	NaN	0.553905	-1.02989	0.0049469		Yes
PCRP_PhaseII	23802-24127	PRMT6	'2C9	K562	11.525		25053295	86.2592	15.8872	7		1			0.31729	0.0762666			-0.343626	-1.73023	-1.28212	-1.17657	-1.61523	0.912716			0.314457	-2.12788	NaN	-0.150439	0.4005	NaN	1.03166	-0.651531	-1.58439		Yes
PCRP_PhaseII	23526-23897	ID3	'2C8	K562	26.845		24961369	86.177	16.5786	17		1			0.487669	0.111505			0.132913	-1.36822	-0.799463	-1.01086	-1.68695	0.762088			0.686828	-1.81915	NaN	-0.178767	0.330335	NaN	0.843821	-0.81977	-1.35322		Yes
PCRP_PhaseIII	26151-28308	NFIA	'2C6	K562	6.57		26979994	70.9731	33.7108	1327		1			0.150414	0.100927			-0.148648	-0.478703	0.0435515	0.338785	-0.705434	0.323322			-0.0523982	-0.559346	NaN	-0.140545	0.315703	NaN	0.646056	-1.09684	-0.519787		Yes
PCRP_PhaseIII	26442-28231	ZKSCAN2	'2C6	K562	2.1		19018868	89.3468	34.4439	55		1			-0.150057	0.0492081			-0.764697	0.00388238	-0.229031	0.0600033	0.00550489	0.19405			-0.57994	0.938083	NaN	0.0170044	-0.155278	NaN	-0.104984	-0.693735	0.160835		Yes
PCRP_PhaseII	22589-23037	ERG	'2C6	K562	0.005		16540313	88.4435	43.9294	220		1			-0.444365	-0.114008			-1.20926	0.0367303	-0.429356	-0.123702	0.327032	0.220644			-1.34685	1.60315	NaN	-0.100832	-0.663351	NaN	-1.04383	-0.149652	0.566373		Yes
PCRP_PhaseII	23524-23895	KLF1	'2C4	K562	32.07		21526442	78.635	23.1167	81		1			0.377006	0.122212			0.139427	-0.969739	-0.603416	-0.56385	-1.28965	0.638827			0.558686	-1.55764	NaN	-0.119541	0.31492	NaN	0.680743	-0.853555	-0.994044		Yes
PCRP_PhaseI	19154-19547	RGCC	'2C4	K562	NaN		15261556	83.9693	52.8479	2572		1			0.157024	-0.150472			-0.992741	-0.00954286	-0.65871	0.211977	0.432525	0.254873			-1.28467	1.82403	NaN	-0.294838	-1.04738	NaN	-1.14985	0.350362	0.653623		Yes
PCRP_PhaseII	24040	ZNF623	'2C3	K562	6.9		21555861	77.1675	26.8563	1321		1			1.20826	0.36918			1.62654	-1.17698	0.261434	-0.692741	-2.11895	-0.00686703			1.95998	-1.57676	NaN	-0.234339	-0.131939	NaN	0.179208	-1.26833	-1.98926		Yes
PCRP_PhaseI	18302	NR2C1	'2C3	HepG2	37.885		11128878	50.4186	81.523	4172		1			0.31562	0.0854528			0.488083	-0.0634079	-0.471386	-0.235758	-0.151428	0.0561955			0.586008	0.00515309	0.347312	-0.0188296	-0.233744	NaN	0.0528179	0.313026	-0.0904996		Yes
PCRP_PhaseIII	26431	TFAP2A	'2C2	K562	0.095		28024437	89.8272	15.1857	30		1			0.178202	0.126583			-0.214518	-1.4316	-0.911155	-1.366	-1.74719	0.830824			0.386324	-2.55548	NaN	-0.198997	0.440078	NaN	0.935151	-1.06929	-1.37811		Yes
PCRP_PhaseII	23533-23904	TFAP2A	'2C2	K562	0.095		23360271	86.6876	14.8448	3		1			0.130374	0.0525511			-0.543885	-1.84719	-1.56153	-1.25315	-1.58162	0.96256			0.14407	-1.86498	NaN	-0.227844	0.440917	NaN	0.904464	-0.739126	-1.29584		Yes
PCRP_PhaseIII	26426	ZNF800	'2C12	K562	17.41		34652290	88.1831	15.8579	1		1			0.132064	0.215221			-0.639272	-1.07193	-1.0147	-0.889405	-1.37399	0.809134			-0.0893869	-2.50218	NaN	0.0196581	0.417912	NaN	0.882371	-0.768715	-1.1473		Yes
PCRP_PhaseII	23538-23909	ZNF335	'2C1	K562	4.43		22280957	85.026	16.2485	79		1			0.281511	0.0860259			-0.0528006	-1.23606	-1.02358	-0.575537	-1.20162	0.771093			0.353605	-1.91478	NaN	-0.152179	0.379317	NaN	0.925538	-0.761049	-1.23367		Yes
PCRP_PhaseII	22884-23333	ZMYM3	'2B9	K562	13.675		30461252	86.0712	24.1804	2165		1			0.127635	0.0242998			0.0567885	-0.224616	0.577519	0.360125	-0.368983	-0.142299			0.11716	-0.367286	NaN	-0.209564	0.26079	NaN	0.0626179	-1.09572	-0.120582		Yes
PCRP_PhaseII	22853	PRDM1	'2B9	K562	0.115		18580204	85.3908	21.7279	4		1			0.305161	0.0157516			-0.150892	-0.985355	-0.890733	-0.782393	-0.930534	0.708246			0.225888	-1.10002	NaN	-0.0809732	0.267545	NaN	0.786973	-0.480087	-0.721677		Yes
PCRP_PhaseII	23842-24496	ZFP28	'2B8	K562	0.005		6064985	85.3286	70.3385	6		1			-0.246486	0.0306081			-1.45845	-0.0170544	-0.792443	-0.0465225	0.381016	0.337522			-1.72415	1.7638	NaN	-0.281127	-0.96248	NaN	-1.20358	0.460884	0.671017		Yes
PCRP_PhaseI	19127	SYAP1	'2B8	K562	NaN		30089749	83.1332	28.6751	5434		1			0.0940542	-0.24174			-0.602193	0.0975487	-0.389215	0.0531155	0.669929	0.0210263			-0.877659	1.32152	NaN	-0.20879	-0.521682	NaN	-0.709807	-0.530409	0.854672		Yes
PCRP_PhaseI	19122-19622	PHF19	'2B8	K562	244.985		5895917	77.0311	60.6767	2		1			-0.434079	-0.260244			-1.8381	-0.0093443	-1.11537	-0.363881	-0.0255464	0.478444			-2.30721	2.08407	NaN	-0.370424	-1.24341	NaN	-1.38033	0.794218	0.182034		Yes
PCRP_PhaseII	22626	IRF9	'2B7	K562	10.05		32819923	80.1152	27.5632	62		1			0.191582	0.139936			-0.394168	-0.94682	-0.703429	-0.81253	-1.06093	0.7055			0.0532525	-1.13361	NaN	-0.0452393	0.328801	NaN	0.604463	-0.539614	-0.878246		Yes
PCRP_PhaseIII	26458	MXD4	'2B6	K562	7.27		13646197	67.3568	37.6426	678		1			0.845042	0.266896			0.793366	-1.28338	-0.726891	-1.26933	-1.47098	0.613838			1.26327	0.410947	NaN	-0.403795	-0.164387	NaN	0.00909314	-0.0171023	-1.16573		Yes
PCRP_PhaseII	23587	MXD4	'2B6	K562	7.27		17640682	75.9762	26.3094	317		1			0.504113	0.0915398			0.353282	-0.983731	-0.666052	-0.847883	-1.22698	0.619272			0.767822	-0.31745	NaN	-0.165744	0.131985	NaN	0.454438	-0.427555	-1.04066		Yes
PCRP_PhaseI	19143	RXRB	'2B6	K562	NaN		25909047	82.2027	33.2801	2702		1			0.626781	-0.0320994			0.857981	-0.32419	-0.154989	0.0126199	0.405349	-0.0852186			0.512536	0.876543	NaN	-0.630612	-0.270667	NaN	-0.25439	-0.410958	0.52358		Yes
PCRP_PhaseII	22981	RELA	'2B6	K562	14.835		20666965	85.4246	17.676	6		1			-0.0453193	-0.0687568			-0.930327	-0.718232	-0.753412	-0.929433	-0.719251	0.686104			-0.320063	-1.26581	NaN	0.0923505	0.320043	NaN	0.640753	-0.704085	-0.573344		Yes
PCRP_PhaseII	23507-23878	SMARCD1	'2B5	K562	36.595		25080878	83.1554	18.4064	20		1			0.341257	0.151179			-0.506954	-1.32474	-1.19757	-2.15209	-1.48238	0.870033			0.142795	-1.88542	NaN	-0.156994	0.440351	NaN	0.809749	-0.885099	-1.28502		Yes
PCRP_PhaseI	18735	ZXDC	'2B5	HepG2	12.035		7519245	79.2646	64.9465	466		1			-0.148246	-0.116518			-0.238956	-0.102583	-0.170393	-0.429785	-0.0183144	0.103123			-0.110676	0.0798718	-0.165522	-0.111127	-0.00905992	NaN	-0.225111	0.208299	-0.020052		Yes
PCRP_PhaseI	18981	MYO1B	'2B4	K562	NaN		11619525	69.0298	81.6439	775		1			0.957543	0.603631			-0.273035	-0.210462	-0.702189	0.341423	0.265261	0.311512			-0.682949	1.74	NaN	-0.406951	-0.984409	NaN	-0.581872	0.476286	0.54785		Yes
PCRP_PhaseI	18948	MEIS2	'2B4	K562	11.235		273288	80.3412	23.025	3		1			0.647465	0.285853			-0.211498	-0.834938	-0.688305	1.6028	NaN	0.676848			1.02155	0.860502	NaN	-0.840235	-0.635798	NaN	1.26071	0.512421	-0.0210273		No
PCRP_PhaseIII	26467-28240	MXD3	'2B4	K562	NaN		22333780	82.1109	27.9775	639		1			0.636931	0.141014			0.829769	-0.551145	-0.0611356	-0.448102	-0.586601	0.17636			0.78707	-0.37398	NaN	-0.166787	0.134274	NaN	0.204651	-1.27647	-0.362616		Yes
PCRP_PhaseII	22204-22794	MXD3	'2B4	K562	NaN		22257903	79.615	30.5898	905		1			0.457401	-0.0457239			0.961642	-0.716789	-0.567934	-0.742492	-0.548396	0.338491			0.706601	-0.0709223	NaN	-0.289107	0.113922	NaN	0.21939	-0.82547	-0.37154		Yes
PCRP_PhaseII	23791-24116	THAP9	'2B3	K562	3.93		23174715	86.7762	15.6638	7		1			0.102876	0.116637			-0.787683	-1.48657	-1.33029	-1.268	-1.54965	0.92152			0.0121229	-2.14893	NaN	-0.185629	0.445072	NaN	1.05282	-0.8437	-1.17645		Yes
PCRP_PhaseI	18439	SMARCD1	'2B3	MCF7	49.685		4410076	57.5657	64.9532	19		1			0.0524714	-0.0827562			0.150615	-0.234275	0.873513	0.263578	0.0447474	-0.0271681			0.488261	0.00754791	-0.859166	-0.389012	0.519444	0.0552587	0.00653338	-0.346431	-0.0029286		No
PCRP_PhaseII	23573	ZBTB7C	'2B11	K562	0		19442162	85.7221	17.324	5		1			-0.0981257	-0.0614855			-1.03634	-1.03	-0.95596	-1.375	-0.751721	0.791963			-0.294081	-1.16607	NaN	-0.16451	0.385194	NaN	0.65721	-0.646293	-0.551277		Yes
PCRP_PhaseI	18650	HAND1	'2A9	K562	0		53446686	83.1573	60.9378	664		1			0.434515	0.227281			0.511381	-0.733868	-0.134312	-0.0513367	-0.467869	0.329587			0.50932	-0.307461	NaN	-0.290861	0.0670449	NaN	0.566174	0.256511	-0.529537		Yes
PCRP_PhaseII	24035	ZNF574	'2A9	K562	6.24		22393964	89.877	16.905	34		1			0.605002	0.21118			0.54909	-1.37285	-0.471781	-0.678703	-1.69881	0.637043			0.839268	-2.59904	NaN	-0.244407	0.341219	NaN	0.842358	-0.895282	-1.30674		Yes
PCRP_PhaseII	23849-24498	ZNF783	'2A8	K562	5.83		6231733	80.9298	57.2842	27		1			-0.00440846	0.013661			-1.27372	-0.0532707	-0.754908	-0.19639	0.357042	0.343918			-1.55282	1.78806	NaN	-0.311646	-0.870034	NaN	-1.2167	0.180689	0.650633		Yes
PCRP_PhaseI	18398	CBX5	'2A7	K562	56.365		20662503	62.2233	61.2172	341		1			0.849369	0.292021			0.501709	-0.356973	-0.175466	0.0363715	-0.401687	0.19872			0.428082	0.665004	NaN	-0.211193	-0.152142	NaN	0.205082	-0.215902	-0.161834		Yes
PCRP_PhaseI	19135-19534	ZBTB32	'2A7	K562	NaN		16093104	84.5411	50.0924	428		1			0.647372	-0.06639			-0.25037	-0.0441286	-0.465621	0.0704997	0.256078	0.17906			-0.576171	1.7061	NaN	-0.306852	-0.84811	NaN	-1.15344	0.185514	0.514622		Yes
PCRP_PhaseII	24047-24394	ZNF549	'2A2	K562	0.23		7288285	84.9109	66.7258	32		1			1.00864	0.391269			0.0784912	-0.0879613	-0.369633	0.233244	0.302444	0.102792			-0.143659	1.45483	NaN	-0.295952	-0.682857	NaN	-0.645488	0.0877406	0.51001		Yes
PCRP_PhaseI	17492	ZIC2	'2A2	K562	1.23		1850523	83.1405	82.1288	3		1			0.0272303	0.0667712			-1.74426	-0.256449	-1.16235	0.0027113	0.334464	0.521732			-2.33489	2.09834	NaN	-0.53456	-1.50324	NaN	-1.53231	0.712154	0.684623		Yes
PCRP_PhaseII	22849-23319	TBX19	'2A12	K562	1.99		33509721	86.7076	19.4926	1		1			-0.396604	-0.11986			-1.34856	-0.522348	-1.07096	-0.69932	-0.249878	0.663241			-1.00729	-0.624756	NaN	0.0456275	0.283087	NaN	0.454	-0.851695	-0.0156574		Yes
PCRP_PhaseII	22192-22784	WHSC1	'2A11	K562	33.05		24650460	85.6719	19.7018	21		1			0.0883007	0.0268943			-0.237931	-1.22284	-0.884662	-0.475721	-1.15619	0.767728			8.20649e-05	-1.32463	NaN	-0.141563	0.382049	NaN	0.831155	-0.871618	-0.811171		Yes
PCRP_PhaseIII	26290-28249	ZEB2	'2A11	K562	48.61		17443139	84.4992	47.7466	99		1			-0.0926989	0.0169707			-1.04254	0.0394884	-0.479076	0.10421	0.183139	0.240994			-1.25123	1.66343	NaN	-0.169739	-0.675031	NaN	-0.915304	-0.0746352	0.478838		Yes
PCRP_PhaseIII	26310	MAFG	'1H7	K562	16.75		14600092	64.4191	45.1282	677		1			0.276352	0.0470986			-0.489383	-0.847901	-0.948672	-1.25251	-0.763644	0.715679			0.0862181	1.05151	NaN	-0.169032	-0.230979	NaN	-0.199716	0.318936	-0.636063		Yes
PCRP_PhaseIII	26461-28236	MEN1	'1H6	K562	16.725		8112780	87.139	53.0715	202		1			0.301447	0.0965875			-0.750007	-0.0070722	-0.0684533	-0.144487	0.125257	0.127017			-0.851853	1.59142	NaN	-0.215843	-0.592041	NaN	-1.22806	0.0106786	0.390673		Yes
PCRP_PhaseII	22196-22787	MEN1	'1H6	K562	16.725		17808541	86.8048	27.0652	496		1			0.31812	-5.69719e-05			0.146965	-0.24719	0.402819	-0.59972	-0.288779	-0.0237932			0.299918	0.41877	NaN	-0.0900449	0.048583	NaN	-0.500063	-1.18562	-0.0850631		Yes
PCRP_PhaseII	23519-23890	ZNF264	'1H4	K562	0.96		20100329	74.0713	28.167	13		1			0.570119	0.116086			0.477694	-0.734458	-0.450662	-0.297971	-0.635374	0.443605			0.630161	-0.780984	NaN	-0.104751	0.181758	NaN	0.455724	-0.858417	-0.477401		Yes
PCRP_PhaseIII	26463-28237	FOXM1	'1H4	K562	7.59		24204038	86.862	23.5859	22		1			0.114514	0.0830632			-0.344886	-0.587603	-0.366127	-0.431326	-0.800437	0.526001			0.25303	-0.40552	NaN	-0.0629436	0.204618	NaN	0.551081	-1.01295	-0.433187		Yes
PCRP_PhaseII	22860	FOXM1	'1H4	K562	7.59		16646571	81.9541	25.8668	22		1			0.323075	0.0364804			-0.0531039	-0.946902	-0.784448	-0.603987	-1.01123	0.675931			0.390553	-0.901126	NaN	-0.153618	0.27352	NaN	0.552306	-0.560176	-0.763918		Yes
PCRP_PhaseII	23767-24092	BATF3	'1H3	K562	0.885		19413257	86.5833	17.5501	10		1			-0.110181	0.04396			-0.873573	-0.653209	-0.519632	-0.424924	-0.526384	0.603321			-0.288277	-0.778191	NaN	0.0504167	0.259707	NaN	0.728776	-0.925142	-0.317654		Yes
PCRP_PhaseII	22977	SAMD4B	'1H3	K562	23.425		18659363	84.5396	19.3122	17		1			0.0768763	0.00252485			-0.64383	-0.831306	-0.647455	-0.77439	-1.1825	0.700095			-0.0574329	-1.2509	NaN	0.0418552	0.336276	NaN	0.677135	-0.805751	-0.826993		Yes
PCRP_PhaseII	24052	LCORL	'1H11	K562	10.675		21678370	84.4094	21.0034	55		1			0.844202	0.353815			0.964259	-1.66719	-0.327378	-0.580594	-1.52161	0.544457			1.18373	-1.94982	NaN	-0.423349	0.264171	NaN	0.813249	-0.708329	-1.59861		Yes
PCRP_PhaseIII	26321	LCORL	'1H11	K562	10.675		18330899	77.2534	32.3016	88		1			0.154512	0.117395			-0.743379	-1.06291	-1.15851	-1.64956	-1.23017	0.83062			0.147909	-0.254619	NaN	-0.203188	0.242955	NaN	0.73462	-0.297166	-1.0339		Yes
PCRP_PhaseII	23574	KLF15	'1H1	K562	1.095		17543237	63.3253	37.831	733		1			0.265565	0.164674			-0.688918	-0.92074	-1.13189	-0.297832	-0.560778	0.745657			-0.182433	0.562078	NaN	-0.26145	0.0289333	NaN	0.46885	0.021943	-0.397848		Yes
PCRP_PhaseII	22616	CREB5	'1G8	K562	0.215		45646071	85.1937	18.0877	320		1			0.0936923	0.191174			-0.757733	-0.773219	-1.093	-0.815974	-0.900989	0.744469			-0.401707	-2.07764	NaN	0.199297	0.351741	NaN	0.803321	-0.604223	-0.915278		Yes
PCRP_PhaseII	22939	MLX	'1G8	K562	30.735		17058738	82.8536	32.9568	35		1			-0.239277	-0.228612			-0.371687	-1.41834	-1.35417	-0.937532	-0.323717	0.812819			-1.04896	-0.453281	NaN	-1.00939	0.433594	NaN	0.783427	0.0143804	-0.130405		Yes
PCRP_PhaseII	23514-23885	ZSCAN2	'1G6	K562	5.48		20445777	82.7281	21.5031	13		1			0.0561798	0.00700664			-0.48497	-0.454629	-0.476838	-0.350792	-0.361712	0.484427			-0.189116	-0.221956	NaN	-0.00818892	0.18495	NaN	0.414249	-0.847868	-0.158924		Yes
PCRP_PhaseIII	26436	ZNF24	'1G5	K562	32.5		19655815	88.2388	27.0031	62		1			0.00461297	0.23549			-0.371839	-0.698297	-0.50978	-0.0545554	-0.711107	0.577488			0.0217593	-0.601365	NaN	-0.113664	0.245415	NaN	0.748067	-0.547985	-0.50524		Yes
PCRP_PhaseI	18455	NR2F2	'1G3	MCF7	NaN		5167238	79.0434	60.0313	10		1			-0.0149171	-0.164324			0.125397	-0.247383	0.703983	-0.126955	-0.194471	0.0298644			0.33776	0.121211	0.477072	-0.347156	0.347391	-0.282734	-0.314341	0.0237535	-0.166704		No
PCRP_PhaseII	23494-23865	SMARCAL1	'1G2	K562	17.695		22919907	86.872	14.6641	1		1			0.0781609	0.0705854			-0.559839	-1.12901	-0.995558	-1.02016	-1.16555	0.802054			0.00561434	-2.33163	NaN	-0.0209231	0.401357	NaN	0.897986	-0.763424	-1.04533		Yes
PCRP_PhaseI	18430	PPP1R10	'1G12	MCF7	23.66		25311657	74.1121	47.7892	872		1			0.857085	0.0190143			1.93508	-0.0340954	0.140673	-0.189613	-0.125019	-0.147126			1.85045	-0.205908	0.88283	0.00334668	0.0732285	-0.177654	-0.0177466	-0.300701	-0.00698781		No
PCRP_PhaseII	23838	ZNF654	'1G11	K562	2.185		25856516	82.0008	24.984	36		1			0.331451	0.120217			-0.203522	-1.43875	-1.30117	-1.45658	-1.84276	0.877259			0.419886	-1.41044	NaN	-0.184389	0.350514	NaN	0.799979	-0.463562	-1.44881		Yes
PCRP_PhaseI	18934	PRRX2	'1G11	K562	0.01		289297	82.7257	20.5402	3		1			0.203586	0.0403438			-1.10458	-0.406095	-1.16635	NaN	0.603638	0.520729			0.335212	0.5892	NaN	0.432783	-0.585172	NaN	NaN	NaN	1.0296		No
PCRP_PhaseI	18944	ZNF574	'1G10	K562	6.24		158231	78.7317	24.661	3		1			0.738842	0.403528			0.203539	-0.834938	-0.273268	NaN	1.64873	-0.0780394			1.16529	0.00423722	NaN	-1.95953	-0.170135	NaN	NaN	NaN	1.44464		No
PCRP_PhaseI	17450	ZKSCAN2	'1G10	K562	2.1		15043569	84.2314	76.2654	77		1			0.299908	0.183809			-0.425753	-0.190898	-0.81356	-0.120048	0.261031	0.357314			-0.867331	1.38487	NaN	-0.303111	-0.635355	NaN	-0.354663	0.662294	0.437191		Yes
PCRP_PhaseII	23572	TSC22D3	'1G10	K562	NaN		20837483	83.4099	18.0852	20		1			0.161442	0.0764133			-0.48842	-0.847324	-0.631803	-0.563091	-0.6167	0.648866			-0.0566851	-1.18715	NaN	-0.0989006	0.318995	NaN	0.767435	-0.763376	-0.441732		Yes
PCRP_PhaseII	23861	ZNF485	'1G1	K562	6.48		27188408	84.6642	16.8271	18		1			0.208476	0.0994923			-0.187311	-1.55673	-1.10331	-1.64603	-1.5528	0.861718			0.306547	-1.97566	NaN	-0.280365	0.428237	NaN	1.00539	-0.784714	-1.33238		Yes
PCRP_PhaseI	18325	ZNF556	'1G1	HepG2	2.985		12727848	67.9306	76.2017	12927		1			0.37306	0.0866242			0.180384	0.204474	-0.0400708	-0.339351	-0.123569	-0.109923			0.306016	0.011143	-0.0341723	0.2111	0.0271261	NaN	-0.117608	0.0435693	-0.192025		Yes
PCRP_PhaseII	23800-24125	ZBTB7B	'1F7	K562	11.77		21871694	85.0723	16.5169	4		1			0.170847	0.178447			-0.566389	-1.09918	-1.31909	-0.624919	-0.8631	0.813312			-0.271627	-2.25165	NaN	-0.0394603	0.405912	NaN	0.797846	-0.607693	-0.714743		Yes
PCRP_PhaseII	22609-23053	MEF2A	'1F7	K562	5.695		5981749	80.5108	60.3158	186		1			0.0729533	-0.0262651			-1.23723	-0.0207647	-0.718718	-0.0413912	0.267569	0.331464			-1.48354	1.88642	NaN	-0.164085	-1.11458	NaN	-1.64433	0.320917	0.567003		Yes
PCRP_PhaseII	23542	SRF	'1F7	K562	NaN		21351577	89.199	22.8453	41		1			-0.375415	-0.107632			-1.28795	-1.42596	-0.806577	-1.60294	-1.38708	0.879246			-0.542715	-1.51308	NaN	-0.191098	0.474818	NaN	0.895687	-0.609624	-1.08649		Yes
PCRP_PhaseII	23797-24122	ZNF408	'1F6	K562	3.76		22060854	83.9457	18.6887	238		1			0.36627	0.174461			0.396529	-1.22922	-0.679135	-0.909266	-1.22334	0.660982			0.290693	-1.48671	NaN	-0.249165	0.374186	NaN	0.870762	-0.725523	-0.949543		Yes
PCRP_PhaseII	23771-24096	PROX2	'1F5	K562	0		21065540	86.1138	17.2714	14		1			0.494596	0.201584			0.303193	-1.24683	-0.561231	-0.755048	-1.26676	0.6592			0.620856	-1.47879	NaN	-0.270732	0.339302	NaN	0.727542	-0.889768	-0.993306		Yes
PCRP_PhaseI	18434	WDR5	'1F5	MCF7	55.48		5671678	48.4065	68.3277	67		1			0.275799	-0.0816328			0.328631	-0.131733	0.742723	0.204982	0.0679417	-0.0514984			0.57617	-0.0396808	-1.4717	-0.261799	0.48697	0.179693	-0.26311	-0.35128	0.00325142		No
PCRP_PhaseI	18958	HOXB2	'1F2	K562	9.94		812341	85.4083	17.4746	3		1			-0.10485	0.417358			-0.588568	-0.717243	0.0601561	1.22573	0.629848	0.209581			-1.20793	0.557019	NaN	-0.847325	0.0966518	NaN	0.768192	-0.132099	0.486456		No
PCRP_PhaseI	18696	GTF2A1	'1F2	K562	14.01		20863055	80.9756	80.6471	34169		1			0.87307	0.401275			-0.604164	-0.0887144	-0.492701	0.112743	0.322868	0.242007			-0.884826	1.72935	NaN	-0.34457	-0.941189	NaN	-1.0385	0.417445	0.600737		Yes
PCRP_PhaseIII	26283	HOXB2	'1F2	K562	9.94		24553139	87.0723	17.0553	61		1			-0.330178	0.157129			-1.0128	-1.52076	-0.989285	-0.483905	-1.34205	0.889351			-0.719783	-1.78954	NaN	-0.380566	0.534584	NaN	1.13542	-0.693944	-1.07706		Yes
PCRP_PhaseI	17468	HDGF	'1F2	K562	163.33		31449694	85.8677	71.4922	64		1			0.193119	0.0983904			-0.382335	-0.16418	-0.542739	-0.680247	-0.238198	0.367806			-0.341983	0.579755	NaN	-0.00678104	-0.269867	NaN	0.194171	0.801476	-0.191835		Yes
PCRP_PhaseII	23589-23938	TCF25	'1F12	K562	63.935		20628210	86.3586	19.791	8		1			-0.318371	-0.117854			-1.0796	-0.319513	-0.72573	-0.375949	-0.0669885	0.505122			-0.790866	0.237857	NaN	0.0307116	0.0925474	NaN	0.239705	-0.873524	0.182729		Yes
PCRP_PhaseII	23804-24129	RPS6KA5	'1F10	K562	2.69		24261473	86.0374	15.9655	83		1			0.747948	0.230053			0.803386	-1.5542	-0.771144	-0.510541	-1.78654	0.664685			1.10224	-2.27075	NaN	-0.309326	0.278162	NaN	0.913609	-0.905069	-1.55205		Yes
PCRP_PhaseI	18759	ZKSCAN1	'1F10	HepG2	28.59		10458035	69.2397	66.4842	7368		1			0.0747013	0.0453741			-0.0572124	-0.188859	0.113475	-0.295469	0.0486303	0.074244			0.0366094	0.0866298	-0.0112065	-0.301613	0.125129	NaN	-0.199743	-0.051854	0.0636514		Yes
PCRP_PhaseI	18320	ZKSCAN1	'1F10	HepG2	28.59		6931769	47.155	86.2132	20526		1			-0.160907	-0.0782304			-0.748561	-0.0954451	-0.484866	-0.326666	-0.147496	0.183962			-0.783609	0.262873	-0.850334	-0.145333	-0.239838	NaN	-0.657036	0.411104	-0.0343484		Yes
PCRP_PhaseI	18976	ZNF384	'1E8	K562	NaN		4280799	75.6964	86.1017	74		1			1.2009	0.78278			-0.878619	-0.140339	-0.785091	0.165836	0.328442	0.357157			-1.3492	1.90639	NaN	-0.390309	-1.20193	NaN	-1.32874	0.552761	0.654452		No
PCRP_PhaseI	17455	MZF1	'1E8	K562	13.13		16094557	86.2446	75.492	20		1			-0.402294	-0.0539591			-1.12151	-0.201285	-1.23575	-0.869456	0.217582	0.509134			-1.49292	1.37981	NaN	-0.27243	-0.692876	NaN	-0.13394	1.01862	0.320204		Yes
PCRP_PhaseI	18677	MZF1	'1E8	K562	13.13		26649778	86.9939	83.071	24831		1			-0.885856	-0.20018			-1.9679	-0.111251	-1.06507	-0.299454	0.311343	0.469118			-2.47133	1.88717	NaN	-0.388159	-1.17117	NaN	-1.2683	0.869476	0.581919		Yes
PCRP_PhaseI	19071	RARB	'1E7	K562	0.385		7052066	82.9481	70.248	26		1			0.5449	0.289047			-0.83311	0.19195	-0.678562	0.242126	0.111356	0.189848			-1.08553	1.63628	NaN	0.168165	-1.00082	NaN	-0.87385	0.282285	0.400839		Yes
PCRP_PhaseII	24063-24403	DDX43	'1E7	K562	0.025		22194133	83.9524	35.5431	670		1			0.568405	0.284066			0.365753	-0.0705304	0.21029	0.857247	-0.445867	-0.104719			0.274682	-0.0059151	NaN	-0.089874	0.106675	NaN	0.442547	-0.803241	-0.279762		Yes
PCRP_PhaseIII	26318	HOXB9	'1E6	K562	NaN		19594008	70.8812	35.6908	734		1			0.802513	0.542237			1.00233	-1.06508	0.0467497	0.435887	-1.05856	0.260874			1.08802	-0.444029	NaN	-0.376066	0.121888	NaN	0.715548	-0.812857	-1.01397		Yes
PCRP_PhaseI	19050	GLI1	'1E6	K562	0.465		42580719	81.9787	59.8615	3131		1			0.963449	0.378307			1.3122	-0.782412	0.400848	0.424906	-0.88387	-0.153302			1.21598	-0.27489	NaN	-0.576914	-0.0195125	NaN	0.46431	0.088393	-0.79789		Yes
PCRP_PhaseIII	26456	ZNFX1	'1E6	K562	1.945		15434350	63.18	40.1713	689		1			0.772094	0.308312			0.430458	-1.23984	-0.747014	-1.28696	-1.05035	0.662029			0.779395	0.636777	NaN	-0.490575	-0.0691276	NaN	0.18389	0.0677722	-0.868904		Yes
PCRP_PhaseIII	26149	GLI1	'1E6	K562	0.465		16524444	71.3696	32.7642	234		1			0.127855	0.123478			-0.899867	-0.896675	-1.10749	-0.786008	-0.989782	0.786494			-0.171968	0.135187	NaN	-0.211768	0.175572	NaN	0.533727	-0.0492762	-0.70151		Yes
PCRP_PhaseII	22859	ZNFX1	'1E6	K562	1.945		20902710	65.2229	38.5004	1161		1			0.593423	0.0884659			-0.0333091	-1.08232	-1.03644	-1.20023	-1.03501	0.741862			0.234667	0.782569	NaN	-0.293468	-0.069566	NaN	0.329368	0.166817	-0.817189		Yes
PCRP_PhaseI	18280	ID1	'1E5	HepG2	175.51		1080446	54.3655	83.2815	508		1			-0.307186	0.00413661			-1.14373	-0.210569	-0.597806	-0.894989	-0.372623	0.285769			-1.07481	0.364335	-1.19475	-0.184491	-0.37889	NaN	-1.02372	0.429051	-0.0273089		Yes
PCRP_PhaseI	18441	ZMAT2	'1E5	MCF7	81		9214151	50.777	60.3631	24		1			0.225606	-0.0688402			0.57604	-0.0339697	0.801799	0.0967062	0.13691	-0.119928			0.747192	-0.166884	0.899195	-0.137794	0.530518	0.0965536	-0.0848631	-0.622836	0.0799191		No
PCRP_PhaseI	19161-19550	NKX3-1	'1E5	K562	0.025		15236636	76.4971	55.5285	2021		1			-0.145181	-0.399431			-1.39016	0.0340208	-0.80073	0.123836	0.347614	0.311373			-1.68668	1.94536	NaN	-0.322788	-1.12929	NaN	-1.29985	0.45513	0.541374		Yes
PCRP_PhaseI	19056	ATRX	'1E4	K562	11.255		21739122	82.2879	64.3812	337		1			0.828205	0.412154			0.688754	-0.371603	-0.231617	0.14411	-0.124271	0.129931			0.553322	0.212481	NaN	-0.246896	-0.178293	NaN	0.269754	0.483912	-0.154001		Yes
PCRP_PhaseII	24060-24401	CREB3L4	'1E4	K562	13.03		18517551	72.4441	46.1198	778		1			0.527881	0.208306			0.147747	-0.0630745	0.00734819	0.258783	-0.0337071	0.0019497			0.203535	0.722807	NaN	0.0813387	-0.24201	NaN	-0.310882	-0.6284	0.15632		Yes
PCRP_PhaseIII	26296	ATRX	'1E4	K562	11.255		18670625	78.7049	29.2117	49		1			0.000466333	0.0859837			-0.885373	-0.728332	-0.866599	-0.530506	-1.08577	0.720947			-0.264835	-0.425885	NaN	-0.0275674	0.283047	NaN	0.671759	-0.772522	-0.646046		Yes
PCRP_PhaseII	24023	KLF12	'1E3	K562	0.06		20552529	88.435	21.3465	5		1			0.617834	0.271145			0.703021	-0.953854	-0.147898	-0.2644	-1.10087	0.405912			0.917281	-1.38127	NaN	-0.236442	0.24269	NaN	0.572966	-0.769245	-0.974487		Yes
PCRP_PhaseI	18628	RELA	'1E3	K562	14.835		23887362	83.3146	67.8379	670		1			0.472633	0.224501			0.12066	-0.257506	-0.189238	0.260756	0.041833	0.172587			-0.0277026	0.942103	NaN	-0.296442	-0.297199	NaN	0.00775446	0.163889	0.245209		Yes
PCRP_PhaseI	18300	DNMT3A	'1E2	HepG2	9.47		4514334	39.9539	87.2257	4208		1			-0.028412	0.108227			-0.656213	-0.117996	-0.578657	-0.608642	-0.279753	0.214023			-0.58319	0.27589	-0.768823	-0.109258	-0.316089	NaN	-1.0438	0.486957	-0.0715378		Yes
PCRP_PhaseII	22937	BRPF1	'1E2	K562	9.03		21458996	86.0468	19.6631	7		1			-0.258676	-0.0689361			-1.05392	-1.26355	-1.35714	-1.729	-1.25012	0.901469			-0.355918	-2.05009	NaN	-0.0923363	0.479888	NaN	0.85511	-0.861144	-1.15283		Yes
PCRP_PhaseII	22845	BRWD1	'1E12	K562	20.57		22644700	86.5706	17.1921	9		1			0.00688493	-0.0149054			-0.897881	-1.06843	-1.1777	-1.17105	-1.08679	0.833942			-0.143693	-1.86026	NaN	-0.0450599	0.398731	NaN	0.817479	-0.708416	-0.874293		Yes
PCRP_PhaseII	24053-24397	ZNF548	'1E11	K562	4.545		32413200	87.3273	23.9997	15		1			0.770369	0.294446			0.89018	-0.601331	0.09823	-0.0373527	-0.576779	0.101918			0.975478	-0.494275	NaN	-0.263757	0.115008	NaN	0.365841	-1.15903	-0.436518		Yes
PCRP_PhaseI	18394	BATF	'1E10	K562	0.115		4412610	36.0985	82.1823	163		1			0.681161	0.322859			-0.602472	-0.144716	-0.889801	-0.0361012	0.17975	0.382933			-0.960207	1.87284	NaN	-0.325607	-1.08949	NaN	-0.849154	0.510086	0.416372		Yes
PCRP_PhaseI	19013	PROX2	'1E1	K562	0		5938436	76.9374	82.7692	207		1			1.12665	1.01967			-0.537904	-0.157583	-0.783737	0.54996	0.288475	0.326732			-1.12197	1.84346	NaN	-0.401874	-1.13754	NaN	-0.308656	0.537242	0.57817		No
PCRP_PhaseIII	26284	PROX2	'1E1	K562	0		23346025	86.1335	19.4626	34		1			0.274081	0.283715			-0.220836	-1.42775	-1.05172	-1.15548	-1.99407	0.853683			0.391441	-1.79998	NaN	-0.236193	0.439724	NaN	0.898945	-1.01149	-1.66624		Yes
PCRP_PhaseII	24043	ZNF746	'1D7	K562	6.025		22486553	85.6979	20.9677	128		1			0.915337	0.319732			1.21613	-1.35953	-0.295361	-0.796262	-1.63931	0.416503			1.34563	-1.95971	NaN	-0.416847	0.207939	NaN	0.67166	-0.788826	-1.46182		Yes
PCRP_PhaseII	24054	RHOXF2	'1D7	K562	127.315		18854369	80.7159	25.0368	186		1			0.847556	0.247287			0.968375	-1.32825	-0.391074	-1.05815	-1.28601	0.49887			1.21081	-1.04593	NaN	-0.390091	0.150387	NaN	0.539705	-0.564874	-1.08429		Yes
PCRP_PhaseIII	26429	ZNF410	'1D7	K562	22.75		27270966	89.0597	18.1419	24		1			0.173176	0.149074			-0.628607	-1.46617	-0.976815	-1.25725	-1.7259	0.877292			0.177633	-1.8752	NaN	-0.184336	0.43676	NaN	0.907631	-0.806836	-1.41243		Yes
PCRP_PhaseII	23843	ZNF354A	'1D7	K562	1.595		22467646	84.2476	17.5642	17		1			0.0338302	0.0643253			-0.658491	-1.27888	-1.3175	-1.20327	-1.33041	0.875992			-0.1479	-1.90218	NaN	-0.085496	0.437789	NaN	0.874864	-0.720224	-1.19048		Yes
PCRP_PhaseII	22182	ZNF410	'1D7	K562	22.75		16930508	84.5533	23.5574	116		1			0.118192	0.0422617			-0.384721	-1.10172	-0.483877	-1.07069	-1.21524	0.706393			-0.0610051	-0.953858	NaN	-0.155129	0.375785	NaN	0.776838	-0.599739	-1.07289		Yes
PCRP_PhaseI	18758	SMAD7	'1D7	HepG2	9.695		11917129	56.2827	70.5174	1141		1			-0.125044	-0.0607505			0.0227192	-0.295184	-0.18782	-1.02654	-0.252277	0.193707			-0.0885935	-0.0757912	0.411949	-0.155822	-0.00340752	NaN	0.276412	0.519734	-0.0792565		Yes
PCRP_PhaseIII	26300	Dcp2	'1D6	K562	19.385		20288953	77.8142	28.0483	93		1			0.579825	0.231755			0.608657	-0.781855	-0.32363	-0.707026	-1.12084	0.440191			0.668085	-0.741054	NaN	-0.156204	0.22933	NaN	0.429565	-0.824734	-0.810694		Yes
PCRP_PhaseIII	26445	ZNF296	'1D6	K562	0.13		18202713	90.316	29.7826	78		1			-0.0422468	0.0726609			-0.704122	-0.716647	-0.639468	-0.847595	-0.991147	0.667269			-0.135681	-0.511412	NaN	-0.0859455	0.262845	NaN	0.579262	-0.343127	-0.645249		Yes
PCRP_PhaseII	23582-23934	CASP8AP2	'1D6	K562	12.17		5998633	83.644	60.1578	6		1			-0.0395478	-0.00367522			-1.29526	-0.0536334	-0.751479	-0.301995	0.289899	0.359303			-1.48105	1.85584	NaN	-0.264329	-0.968001	NaN	-1.51787	0.320248	0.533543		Yes
PCRP_PhaseI	18401	NPM3	'1D5	K562	57.16		2686989	48.824	79.3141	103		1			1.08429	0.416679			-0.997308	-0.194225	-0.823828	0.0133209	0.322281	0.402411			-1.43935	1.99024	NaN	-0.463576	-1.22267	NaN	-1.53313	0.49342	0.620654		Yes
PCRP_PhaseI	19002	ZNF264	'1D5	K562	0.96		16422679	70.053	82.891	226		1			0.528382	0.393024			-0.809116	-0.118275	-0.812076	0.00588826	0.216271	0.369956			-1.27502	1.82383	NaN	-0.383879	-1.04688	NaN	-0.7464	0.687985	0.469471		Yes
PCRP_PhaseII	23578	HAND1	'1D5	K562	0		24483431	82.2095	22.3988	17		1			0.0466367	0.0217647			-0.669932	-1.34996	-1.3644	-1.93458	-1.59	0.904409			-0.15785	-1.26232	NaN	-0.116598	0.416694	NaN	0.921267	-0.756248	-1.25932		Yes
PCRP_PhaseII	23841	ZNF232	'1D5	K562	4.56		20761510	85.8902	18.906	19		1			0.0392871	0.015663			-0.467363	-0.914082	-0.679773	-0.759037	-0.709596	0.678938			-0.0633451	-1.03771	NaN	-0.030522	0.312842	NaN	0.775572	-0.768666	-0.650554		Yes
PCRP_PhaseI	18757	PCGF3	'1D5	HepG2	51.705		10482523	52.0665	71.8105	1458		1			-0.13762	-0.111581			-0.256895	-0.1116	-0.157185	-0.360668	-0.168272	0.125094			-0.256455	0.0844722	-0.228246	-0.116657	-0.0696761	NaN	-0.0919143	0.174995	0.0219699		Yes
PCRP_PhaseI	19132	NR2F1	'1D5	K562	NaN		17187894	82.0261	40.7217	2540		1			-0.0392108	-0.295729			-0.858395	0.220592	-0.402234	-0.102129	0.73133	-0.0449261			-1.22446	1.55868	NaN	-0.208267	-0.678984	NaN	-0.947166	-0.352767	0.811051		Yes
PCRP_PhaseI	18930	TAX1BP1	'1D4	K562	71.57		140940	78.4328	24.8329	3		1			0.470867	-0.0524222			NaN	-0.419901	-1.85823	NaN	-0.673202	0.828851			1.16529	1.32617	NaN	-0.374572	-3.17013	NaN	0.726372	1.71505	-0.140326		No
PCRP_PhaseI	19164	RNF2	'1D4	K562	NaN		13145624	83.408	45.7585	1205		1			-0.313318	-0.482947			-1.3611	0.228216	-0.266591	-0.0371251	0.777363	-0.0658878			-1.55424	1.64915	NaN	-0.357131	-0.713755	NaN	-1.52517	-0.0455025	0.83331		Yes
PCRP_PhaseI	18969	HOXC8	'1D3	K562	0.35		121490	75.3756	28.2521	3		1			0.350226	-0.104483			NaN	NaN	0.0746557	NaN	0.259684	0.854846			2.4201	0.937123	NaN	-1.02665	NaN	NaN	NaN	0.326008	0.79256		No
PCRP_PhaseI	19158	ZBTB17	'1D3	K562	NaN		20864548	82.8671	33.2393	2814		1			0.628465	-0.231174			0.883536	-0.158553	-0.192733	-0.138667	0.287751	-0.141032			0.701734	1.06038	NaN	-0.442959	-0.440919	NaN	-0.482724	-0.460037	0.400063		Yes
PCRP_PhaseII	22184	ESRP2	'1D2	K562	0.035		18413460	83.5812	19.41	14		1			0.50591	0.158362			0.208047	-0.919345	-0.461878	-0.250673	-1.09372	0.574696			0.64375	-1.51907	NaN	-0.102422	0.270574	NaN	0.651466	-0.84133	-0.833119		Yes
PCRP_PhaseII	23517-23888	SCML2	'1D12	K562	NaN		24116687	80.2511	21.6811	161		1			0.751351	0.275838			0.818526	-1.44284	-0.586347	-1.01546	-1.65206	0.613959			1.10962	-0.790718	NaN	-0.477464	0.213214	NaN	0.718688	-0.809135	-1.28215		Yes
PCRP_PhaseII	23504-23875	ZBTB25	'1D12	K562	2.925		19255097	84.5822	18.4324	27		1			0.186384	0.0951597			-0.330436	-0.790973	-0.512015	-0.312409	-0.484374	0.582426			0.195034	-0.835527	NaN	-0.120659	0.261241	NaN	0.590533	-0.852635	-0.356335		Yes
PCRP_PhaseII	24058-24400	ZNF280D	'1D11	K562	13.575		18904134	86.3843	43.8076	44		1			0.271397	0.124125			-0.289509	0.0224606	-0.176864	0.278502	0.0656423	0.0867448			-0.386666	1.0346	NaN	-0.0628972	-0.264406	NaN	-0.187666	-0.353579	0.244105		Yes
PCRP_PhaseIII	28408	HSF1	'1D11	K562	27.005		21078065	82.8009	22.908	100		1			0.395246	0.0632741			-0.104954	-1.48072	-0.292693	-2.05523	-1.45081	0.715333			0.243713	-1.62783	NaN	-0.376038	0.473077	NaN	0.643048	-0.817958	-1.22365		Yes
PCRP_PhaseIII	28400	HSF1	'1D11	K562	27.005		24308496	82.8149	22.7549	176		1			0.255551	0.00920391			0.030718	-1.60281	-0.212965	-1.413	-1.86118	0.709			0.153041	-1.29258	NaN	-0.526995	0.509815	NaN	0.573948	-0.664353	-1.41561		Yes
PCRP_PhaseIII	28404	HSF1	'1D11	K562	27.005		26167440	84.6231	20.2822	109		1			0.125251	0.000882777			-0.343559	-1.43855	-0.540152	-2.4308	-1.7068	0.792747			-0.015632	-1.42822	NaN	-0.299342	0.493505	NaN	0.701573	-0.80438	-1.45053		Yes
PCRP_PhaseII	24034	KIAA1967	'1D10	K562	103.005		21027178	89.038	17.7641	8		1			0.461143	0.221464			0.187743	-1.76872	-0.689441	-1.09348	-1.83699	0.793907			0.632277	-2.28864	NaN	-0.359695	0.380304	NaN	1.05017	-0.719181	-1.28698		Yes
PCRP_PhaseI	17470	DDIT3	'1D10	K562	68.57		23029854	81.4075	78.2208	812		1			0.22817	0.177332			-0.340415	-0.29295	-0.743303	-0.222258	0.125046	0.400128			-0.754196	1.06228	NaN	-0.317188	-0.429703	NaN	-0.0110664	1.00656	0.0702787		Yes
PCRP_PhaseII	24028	HDGF	'1D1	K562	163.33		24525862	86.1206	17.2567	64		1			0.773761	0.385698			0.595026	-1.55794	-0.477867	-0.807907	-1.83381	0.662597			1.04659	-2.60866	NaN	-0.278931	0.297689	NaN	0.89035	-0.863081	-1.53335		Yes
PCRP_PhaseII	24036	BHLHA9	'1D1	K562	0		19935277	84.9108	20.8449	564		1			0.7965	0.350446			1.14878	-0.991637	-0.0959372	-0.549666	-1.33381	0.281494			1.18429	-1.58046	NaN	-0.229104	0.181187	NaN	0.460208	-0.78932	-1.07913		Yes
PCRP_PhaseII	24049	SKIL	'1D1	K562	3.79		17956378	76.9532	25.1978	42		1			0.825214	0.34333			0.861117	-1.18373	-0.138457	-0.343778	-1.31861	0.428065			1.08712	-1.26902	NaN	-0.434048	0.231391	NaN	0.638983	-0.7814	-0.989555		Yes
PCRP_PhaseII	22222-22809	FOXP4	'1D1	K562	1.275		31168598	86.4337	16.9753	2		1			-0.523361	-0.147747			-1.48309	-0.823601	-1.31904	-1.46021	-0.857336	0.822292			-1.00804	-1.17465	NaN	0.00464274	0.406073	NaN	0.806802	-0.865935	-0.548118		Yes
PCRP_PhaseII	23498-23869	HOXB2	'1C9	K562	9.94		22321336	87.5623	15.8438	130		1			-0.324773	-0.00436078			-0.876444	-1.26074	-0.58337	0.095396	-0.725704	0.747018			-0.744403	-1.17214	NaN	-0.191913	0.408643	NaN	0.852751	-0.670602	-0.419123		Yes
PCRP_PhaseII	22871	UBE2B	'1C7	K562	45.05		21789682	81.3311	24.6518	53		1			0.123861	-0.0446112			-0.571616	-1.19506	-1.12829	-1.50906	-1.21075	0.83459			-0.0322149	-1.16846	NaN	-0.075964	0.327019	NaN	0.939732	-0.545521	-0.895939		Yes
PCRP_PhaseII	23801-24126	ANKZF1	'1C6	K562	41.345		20410131	85.9003	16.4055	14		1			0.366745	0.170276			-0.109949	-0.737138	-0.526465	-0.113024	-0.492731	0.542724			0.176055	-1.32182	NaN	-0.0811399	0.272129	NaN	0.709204	-0.888694	-0.268445		Yes
PCRP_PhaseI	19137-19536	HAND2	'1C6	K562	NaN		13167263	81.4156	55.3145	172		1			-0.0599219	-0.247458			-1.333	-0.00388855	-0.829747	0.0261024	0.334335	0.337699			-1.72039	1.97839	NaN	-0.362001	-1.17281	NaN	-1.29466	0.460942	0.555362		Yes
PCRP_PhaseI	18309	HLF	'1C5	HepG2	211.32		6028746	29.9872	88.6532	14189		1			-0.182141	0.0342313			-0.747843	-0.135913	-0.615875	-0.770005	-0.227144	0.225343			-0.833662	0.266852	-0.840145	-0.232565	-0.376632	NaN	-0.691148	0.875772	-0.147577		Yes
PCRP_PhaseII	24065	ZKSCAN7	'1C4	K562	NaN		18960476	87.7881	20.0137	2		1			0.666989	0.310859			0.501381	-1.11993	-0.317412	-0.593347	-0.956061	0.528868			0.780067	-1.7063	NaN	-0.23084	0.273132	NaN	0.786352	-0.761023	-0.885216		Yes
PCRP_PhaseII	22615	TCEAL8	'1C4	K562	39.105		42566263	83.8084	19.7032	954		1			0.73428	0.239187			0.858776	-1.1408	0.0787403	-0.529482	-1.64028	0.369771			1.05837	-2.35902	NaN	-0.13855	0.272203	NaN	0.42349	-0.857504	-1.3881		Yes
PCRP_PhaseIII	26324	TCEAL8	'1C4	K562	39.105		20633280	82.641	25.3802	384		1			0.622012	0.15807			0.513467	-1.18494	0.230826	-1.19841	-2.01498	0.434203			0.930211	-1.64023	NaN	-0.294146	0.379608	NaN	0.224863	-1.13587	-1.69733		Yes
PCRP_PhaseII	23781-24106	ZNF280A	'1C4	K562	13.595		21811705	87.3506	16.4268	37		1			0.285726	0.111784			-0.148745	-1.02566	-0.687113	-0.453618	-1.14466	0.692938			0.380572	-1.65084	NaN	-0.0770067	0.347714	NaN	0.749365	-1.03699	-0.947408		Yes
PCRP_PhaseI	19073	HMGA1	'1C3	K562	203.84		37657607	84.3572	57.7258	37		1			-0.214332	-0.167674			-0.77068	-0.333556	-0.899869	-1.15224	-0.40271	0.56291			-0.840199	0.727035	NaN	-0.194778	-0.121351	NaN	0.295123	0.734987	-0.330236		Yes
PCRP_PhaseI	19147-19543	RBBP5	'1C3	K562	NaN		12615410	77.6573	57.5725	339		1			0.224769	-0.22004			-0.981296	-0.026018	-0.701045	0.21016	0.446189	0.269078			-1.25811	1.82427	NaN	-0.371368	-1.06024	NaN	-1.10949	0.437341	0.678075		Yes
PCRP_PhaseII	23806-24131	CC2D1A	'1C2	K562	11.075		27852599	87.833	14.5281	5		1			0.14024	0.0987058			-0.726071	-1.33418	-1.34079	-1.02725	-1.24436	0.885613			-0.145577	-2.04624	NaN	-0.0691086	0.43852	NaN	0.913338	-0.894155	-1.08247		Yes
PCRP_PhaseII	22945	YBX2	'1C2	K562	0		25102249	84.6872	21.3797	19		1			-0.161635	0.0132699			-1.35876	-1.46894	-1.59456	-2.0039	-1.54113	0.973298			-0.278838	-1.83519	NaN	-0.0865074	0.457691	NaN	0.855238	-0.612314	-1.36376		Yes
PCRP_PhaseII	22842	ISL1	'1C2	K562	0		19616237	86.2392	20.0754	8		1			0.110645	-0.0238718			-0.614038	-0.834056	-0.736971	-0.805194	-0.701424	0.683891			-0.0593577	-1.16109	NaN	-0.0910691	0.317939	NaN	0.666498	-0.63532	-0.476002		Yes
PCRP_PhaseI	18311	ING1	'1C2	HepG2	9.02		3774569	38.5362	86.8806	2694		1			-0.181166	-0.0415588			-0.888675	-0.174648	-0.597041	-0.634534	-0.265473	0.248989			-1.04935	0.318758	-1.04323	-0.194376	-0.291486	NaN	-1.16232	0.423172	-0.0118469		Yes
PCRP_PhaseI	18750	ING1	'1C2	HepG2	9.02		10789244	57.1174	71.3394	1716		1			-0.0784877	-0.0576665			-0.173549	-0.34486	-0.532503	-0.988752	-0.439697	0.280481			-0.487112	0.112187	0.00366294	-0.315648	-0.110467	NaN	-0.532364	0.636577	-0.0369603		Yes
PCRP_PhaseII	23780-24105	SNW1	'1C12	K562	32.09		22171187	87.4694	15.7888	8		1			0.0979203	0.0712905			-0.708877	-1.17858	-0.91047	-0.854581	-1.12777	0.807349			-0.0651528	-1.61186	NaN	-0.100208	0.380073	NaN	0.889437	-0.771175	-0.775156		Yes
PCRP_PhaseI	18431	ARNTL	'1C12	MCF7	7.14		4855461	55.1628	71.7433	59		1			-0.0205969	-0.167188			0.268271	-0.18267	0.642495	0.0497725	-0.121701	-0.00373191			0.461872	0.0567472	-0.246302	-0.251529	0.426348	-0.331878	-0.0942991	-0.0760369	-0.168893		No
PCRP_PhaseIII	26462	KLF7	'1C11	K562	0.25		17377423	80.9557	25.6939	263		1			0.58566	0.24577			0.543784	-1.17321	0.252609	-0.60054	-1.44549	0.384972			0.793651	-1.09543	NaN	-0.369304	0.334328	NaN	0.463443	-0.910259	-1.18181		Yes
PCRP_PhaseII	22625	KLF7	'1C11	K562	0.25		31885241	80.788	29.0194	271		1			0.380173	0.158373			0.149614	-0.968346	-0.031414	-0.644282	-0.926151	0.481899			0.326867	-1.29985	NaN	-0.219991	0.355179	NaN	0.543595	-0.626394	-0.839102		Yes
PCRP_PhaseII	23798-24123	ZNF483	'1C11	K562	0.21		22108587	85.4664	17.0694	11		1			0.155082	0.113635			-0.64081	-1.17936	-0.727383	-0.411474	-1.24002	0.77721			0.103886	-1.72274	NaN	-0.172938	0.41633	NaN	0.773678	-0.899059	-0.917934		Yes
PCRP_PhaseII	23818	GMEB1	'1C1	K562	4.61		16150637	88.1123	34.0673	13		1			0.341637	0.245767			0.689435	-1.26034	-0.344455	-1.00582	-1.00881	0.530085			0.946118	-0.76372	NaN	-0.631808	0.178653	NaN	0.745608	-0.271458	-0.638396		Yes
PCRP_PhaseII	24064	ZNF48	'1B9	K562	2.735		22672165	86.6782	15.8484	1393		1			0.962039	0.449498			1.27992	-1.07316	0.244231	0.448223	-1.18179	0.0765652			1.29763	-1.98139	NaN	-0.493783	0.236555	NaN	0.640157	-1.14977	-0.983107		Yes
PCRP_PhaseIII	26314	ZNF48	'1B9	K562	2.735		23977595	85.094	20.0253	448		1			0.135916	0.109285			0.0197513	-1.09688	-0.178707	-0.463631	-1.02081	0.573777			0.309507	-1.46244	NaN	-0.308472	0.407878	NaN	0.808214	-0.997105	-0.924034		Yes
PCRP_PhaseII	23569	RUNX2	'1B9	K562	0.185		18165664	83.5622	20.4941	56		1			0.0590718	0.00956373			-0.764193	-1.01459	-0.936521	-1.37813	-0.862013	0.776151			-0.132988	-0.400952	NaN	-0.151419	0.283932	NaN	0.744125	-0.527396	-0.725384		Yes
PCRP_PhaseII	22611-23055	USF1	'1B8	K562	32.875		380547	75.5273	86.4118	46		1			1.90409	0.544781			-0.031397	-0.26041	-0.598512	-0.449759	0.277241	0.290063			-0.755829	1.85811	NaN	-0.596369	-0.940887	NaN	-1.77971	0.488308	0.510713		No
PCRP_PhaseI	18409	USF1	'1B8	K562	32.875		7383986	60.6698	65.438	1926		1			1.51883	0.42498			1.01905	-0.82002	0.335245	0.00654641	-0.00416889	-0.0714086			0.294434	1.00682	NaN	-0.934927	-0.0557004	NaN	-0.142855	-0.330942	0.0938764		Yes
PCRP_PhaseI	19077	USF1	'1B8	K562	32.875		10028916	85.2313	74.6775	814		1			1.1861	0.383267			-0.0494146	-0.188071	-0.408946	0.216057	0.256708	0.200191			-0.695434	1.6391	NaN	-0.429627	-0.768313	NaN	-0.700346	0.36792	0.527684		Yes
PCRP_PhaseI	18974	USF1	'1B8	K562	32.875		484212	85.0094	19.24	6		1			1.30956	0.313537			2.51663	-1.97354	0.17309	0.376732	-0.729345	-0.964257			1.5576	-0.740949	NaN	-1.91117	0.233071	NaN	0.774735	-1.08903	-0.885512		No
PCRP_Phase0	17357	USF1	'1B8	K562	32.875		695174	72.5642	55.3068	9		1			1.11233	0.296034			0.667099	-0.567776	-0.264339	-0.451966	-0.123106	0.239334			-0.288058	1.70758	NaN	-0.769813	-0.594135	NaN	-1.21636	0.241806	0.303968		Yes
PCRP_PhaseIII	26435	LEUTX	'1B8	K562	0		22073972	82.5613	29.4454	138		1			0.343861	0.203186			0.0321464	-1.22432	0.0576605	-1.18127	-1.74161	0.574386			0.470141	-1.37945	NaN	-0.331014	0.410732	NaN	0.557054	-0.7582	-1.268		Yes
PCRP_PhaseII	23839-24494	USF1	'1B8	K562	32.875		3525553	89.69	65.8917	839		1			1.51494	0.198594			-0.312544	-0.275097	-0.328989	0.143563	0.27373	0.25714			-1.1362	1.81358	NaN	-0.596673	-0.766269	NaN	-1.20212	0.304304	0.524841		Yes
PCRP_PhaseI	17415-22026	ID4	'1B8	MCF7	3.18		9742915	82.6332	53.6515	4		1			0.52474	0.174219			0.735874	-0.0742056	0.347387	0.36212	0.180659	-0.0538476			0.580219	-0.100823	0.595697	-0.0825702	0.224552	0.162198	0.135692	-0.413522	0.106337		Yes
PCRP_PhaseII	22950-23069	NFIA	'1B8	K562	6.57		5965092	86.1768	59.5182	78		1			0.272755	0.148799			-0.460687	-0.0653765	-0.0194622	0.267197	0.175887	0.0835441			-0.843777	1.45605	NaN	-0.311227	-0.46738	NaN	-0.549976	0.00567866	0.419572		Yes
PCRP_PhaseII	23863-24503	USF1	'1B8	K562	32.875		20071311	86.7377	38.5694	5824		1			1.20661	0.0818141			0.489497	-0.387797	0.254827	0.396399	0.1962	-0.0792003			-0.134386	0.846525	NaN	-0.517415	-0.0150527	NaN	-0.110714	-0.751982	0.292731		Yes
PCRP_PhaseIII	28411-28669	USF1	'1B8	liver	unknown		23469357	85.8619	43.4629	10539		1			0.852018	0.0582576			0.919946	-0.162239	0.525858	-0.126914	-0.5673	-0.0924948			1.06774	0.208205	-2.30227	-0.135068	-0.191967	0.00226013	-0.744087	-0.749782	-0.121076		Yes
PCRP_PhaseI	19118-19618	IKZF1	'1B8	K562	NaN		8868971	79.412	55.2864	15		1			-0.1181	0.0298948			-1.03018	-0.0505118	-0.274968	-0.167746	-0.175089	0.294032			-1.3752	1.90159	NaN	-0.418322	-0.797618	NaN	-1.01748	0.538405	0.0376368		Yes
PCRP_PhaseI	18327	USF1	'1B8	HepG2	20.32		4609209	53.1769	82.519	3925		1			0.606691	0.0108929			0.0781541	-0.201134	-0.30882	-0.413548	-0.262341	0.162088			0.614838	0.211746	-0.497724	-0.167325	-0.268076	NaN	-0.752484	0.253869	-0.0340443		Yes
PCRP_PhaseIII	28429-28679	USF1	'1B8	placenta	unknown		18082103	87.1211	45.5895	20907		1			-0.0848783	-0.0127661			-0.623752	-0.0103293	-0.247709	-0.224764	-0.106949	0.0814404			-0.675977	0.188107	-1.40437	-0.0243987	-0.20335	0.349273	-0.494704	0.0644968	-0.0838917		Yes
PCRP_PhaseI	18457	USF1	'1B8	MCF7	20.76		1809310	79.4537	63.1777	9		1			0.914621	-0.0720601			1.23285	-0.600655	0.047555	0.495256	-0.43276	0.148761			1.24252	0.286091	-1.51584	-0.504251	-0.113916	0.398582	0.182129	-0.0962174	-0.300596		Yes
PCRP_PhaseI	19125-19625	USF1	'1B8	K562	32.875		3534104	83.7332	78.9676	82		1			0.182498	-0.208394			-1.06445	-0.154595	-0.863888	-0.239693	0.12549	0.435595			-1.80959	2.03406	NaN	-0.523008	-1.21461	NaN	-1.56021	0.819329	0.368882		Yes
PCRP_PhaseI	19173-19559	USF1	'1B8	K562	32.875		16631669	84.1973	53.8228	11348		1			0.706517	-0.239245			-0.217019	-0.14331	-0.381136	0.425805	0.320193	0.178061			-0.953893	1.76711	NaN	-0.502455	-0.788346	NaN	-0.708243	0.269931	0.505027		Yes
PCRP_PhaseI	19007	ZNF746	'1B7	K562	6.025		1368894	54.7174	94.3807	289		1			0.709457	0.653921			-1.20404	-0.173445	-0.993924	0.0111301	0.378225	0.427734			-1.75498	1.99412	NaN	-0.45546	-1.35322	NaN	-1.39197	0.643519	0.6909		No
PCRP_PhaseI	17441-22049	RUNX2	'1B7	MCF7	3.325		5645221	85.8035	48.3053	940		1			0.574607	0.220286			0.540582	-0.194502	0.240656	0.27855	0.0743787	0.030415			0.525256	0.0833277	-0.328523	-0.209377	0.0581439	-0.017209	0.0561404	-0.400752	0.0344759		Yes
PCRP_PhaseII	22968	DMTF1	'1B7	K562	126.885		21698488	86.2301	15.2838	5		1			0.222341	0.0920095			-0.545971	-1.28852	-1.10684	-1.6116	-1.26311	0.847116			-0.0215785	-2.40259	NaN	-0.101564	0.458658	NaN	0.71105	-0.69518	-1.22863		Yes
PCRP_PhaseIII	26444	GRHL1	'1B6	K562	3.875		26008784	89.3792	18.988	8		1			0.0367673	0.0866468			-0.773377	-1.40083	-1.09338	-1.64358	-2.09758	0.904402			0.269418	-2.10531	NaN	-0.177331	0.413389	NaN	0.969709	-0.796841	-1.29399		Yes
PCRP_PhaseII	22966	MBD2	'1B6	K562	NaN		19350894	69.3172	32.2578	426		1			0.135578	0.0390056			-0.740427	-0.89452	-0.982105	-0.936112	-0.678136	0.741699			-0.186948	0.246747	NaN	-0.192521	0.123971	NaN	0.508366	-0.147558	-0.444305		Yes
PCRP_PhaseI	18648	LEUTX	'1B6	K562	0		18137167	83.9127	74.7682	38		1			-0.14221	0.0376583			-1.13285	-0.067438	-0.63316	-0.00635806	0.25316	0.33027			-1.4669	1.74784	NaN	-0.289733	-0.867553	NaN	-0.915473	0.480189	0.490752		Yes
PCRP_PhaseII	22864	DPF1	'1B6	K562	2.065		21475652	86.3379	18.723	7		1			0.12178	-0.0401942			-0.727153	-1.16156	-1.26787	-1.23478	-1.27047	0.856197			-0.264398	-2.0205	NaN	-0.111182	0.440456	NaN	0.932681	-0.579418	-1.09106		Yes
PCRP_PhaseII	24025	HOMEZ	'1B5	K562	19.12		25937135	85.3007	18.2604	335		1			0.810904	0.348398			0.816304	-1.23758	-0.141094	-0.710731	-2.15384	0.491837			1.18812	-2.34105	NaN	-0.138723	0.242003	NaN	0.752528	-1.01059	-1.90066		Yes
PCRP_PhaseII	22861	BRD1	'1B5	K562	1.52		22399016	78.4935	24.6552	100		1			0.481366	0.0851784			0.130257	-1.00396	-0.704903	-0.898719	-1.57919	0.681153			0.558399	-0.958879	NaN	0.00648538	0.217671	NaN	0.620862	-0.553815	-1.13082		Yes
PCRP_PhaseII	23520-23891	IRX5	'1B4	K562	0.485		20664048	80.596	21.6014	7		1			0.271536	0.0830785			-0.441578	-1.19449	-0.855781	-1.24354	-1.13811	0.784978			0.200145	-1.43186	NaN	-0.179315	0.355471	NaN	1.0357	-0.882513	-0.882528		Yes
PCRP_PhaseII	23775-24100	ZNF550	'1B4	K562	7.56		7854506	89.4982	41.8179	3033		1			-0.0944796	0.0201524			-0.526065	-0.191499	-0.0187254	0.270785	0.436405	0.103551			-0.909236	1.46123	NaN	-0.482693	-0.425113	NaN	-0.668087	0.0233247	0.51232		Yes
PCRP_PhaseII	23835	DDX41	'1B4	K562	87.885		31183909	85.28	17.3768	13		1			-0.0434104	-0.00336928			-1.02233	-1.1406	-1.36888	-1.10925	-1.25113	0.8789			-0.339499	-1.66623	NaN	-0.0758966	0.408534	NaN	0.91993	-0.582197	-0.921822		Yes
PCRP_PhaseI	18396	TRIM27	'1B3	K562	135.095		14179572	57.3021	67.3529	342		1			0.921222	0.411643			0.602372	-0.446206	-0.419688	-0.102704	-0.161475	0.253839			0.495221	0.87179	NaN	-0.336604	-0.241332	NaN	-0.0263609	-0.16928	-0.00653397		Yes
PCRP_PhaseIII	26448	GTF2F2	'1B3	K562	13.735		19934265	85.3431	18.502	154		1			0.803428	0.337705			0.869258	-0.970362	-0.126352	-0.178516	-1.20748	0.363681			1.01355	-1.70516	NaN	-0.289263	0.282021	NaN	0.609932	-1.1357	-1.07713		Yes
PCRP_PhaseII	23509-23880	GTF2F2	'1B3	K562	13.735		21504960	84.707	17.2837	215		1			0.771278	0.171241			0.879817	-1.49995	-0.663921	-0.998651	-1.41839	0.611641			1.00666	-1.93321	NaN	-0.35932	0.319228	NaN	0.582926	-0.847466	-1.32461		Yes
PCRP_PhaseII	23500-23871	DMRTB1	'1B3	K562	0.01		18905657	88.5719	18.6582	1		1			-0.0969015	0.0160454			-0.61223	-0.428871	-0.385907	-0.402469	-0.081732	0.435489			-0.280298	-0.175335	NaN	-0.068953	0.187372	NaN	0.298563	-1.15115	0.109936		Yes
PCRP_PhaseI	18967	ZBTB18	'1B2	K562	1.59		325652	71.0263	31.8913	3		1			0.629568	0.374715			0.466574	-3.15687	-0.0102332	2.28087	0.91176	0.272458			0.894639	0.73359	NaN	-2.81514	0.061718	NaN	-0.129238	-0.462488	0.325992		No
PCRP_PhaseII	24045-24393	RBMS2	'1B2	K562	0.85		29541131	78.0409	29.6477	78		1			0.651122	0.274183			0.671644	-0.813024	-0.145668	-0.129267	-0.675043	0.339555			0.802651	-0.590488	NaN	-0.234396	0.141893	NaN	0.537367	-0.821029	-0.473393		Yes
PCRP_PhaseII	22974-23082	YY1	'1B2	K562	27.435		43300432	85.6911	18.3199	35		1			0.559082	0.227997			0.637213	-0.917916	-0.361454	-0.31112	-1.01144	0.464738			0.762349	-1.82557	NaN	-0.105609	0.275683	NaN	0.597671	-0.869103	-0.935983		Yes
PCRP_PhaseIII	28430	YY1	'1B2	placenta	unknown		18595934	69.5115	37.0236	977		1			0.296186	0.217002			1.3487	-0.206287	0.224296	0.473816	0.24381	-0.262071			1.34508	-0.661579	2.05878	-0.255168	0.471253	0.024831	1.22406	0.495842	-0.342944		No
PCRP_PhaseII	22623	CEBPE	'1B2	K562	0.04		29557414	82.4582	30.5589	28		1			0.130773	0.0847026			-0.486482	-1.02922	-0.729087	-0.757672	-1.14027	0.737691			0.000425946	-1.15253	NaN	-0.0922741	0.32683	NaN	0.811859	-0.530523	-0.800936		Yes
PCRP_PhaseII	23586-23937	USP16	'1B2	K562	25.485		10526405	69.4335	50.2857	150		1			0.124657	-0.028513			-0.936985	-0.14284	-0.52136	-0.201255	0.115757	0.351883			-0.931949	1.55695	NaN	-0.186784	-0.568826	NaN	-0.70764	-0.0533811	0.383064		Yes
PCRP_PhaseII	22207	ZBTB14	'1B12	K562	NaN		19296886	85.1618	18.3107	191		1			0.246162	-0.00938997			0.597199	-0.946883	-0.876748	-0.936426	-1.15616	0.597495			0.525689	-1.29147	NaN	-0.156163	0.304409	NaN	0.561313	-0.842327	-0.795191		Yes
PCRP_PhaseIII	26315-28257	ZZZ3	'1B11	K562	19.625		8160372	83.8507	62.5395	428		1			1.48765	0.186669			-0.164408	-0.108772	-0.665456	-0.154995	0.123776	0.278438			-0.300756	1.84322	NaN	-0.324693	-1.09182	NaN	-1.53913	0.339474	0.41221		Yes
PCRP_PhaseII	23510-23881	PUM2	'1B11	K562	NaN		22306579	82.9604	19.2451	9		1			0.418284	0.158569			0.231525	-1.24267	-0.509972	-0.558579	-1.20015	0.654412			0.545366	-1.39237	NaN	-0.188664	0.303055	NaN	0.84726	-0.755177	-0.964233		Yes
PCRP_PhaseII	24042-24392	WDHD1	'1B10	K562	19.84		20282312	87.4587	38.975	18		1			0.536941	0.281289			0.177147	-0.121869	0.0525764	0.244587	0.131138	-0.0215767			0.117058	0.773377	NaN	-0.191901	-0.175056	NaN	-0.106497	-0.621006	0.307451		Yes
PCRP_PhaseI	17432-22040	FOSL2	'1B1	MCF7	24.845		6943933	77.5163	51.0108	13		1			0.450099	0.186095			0.643779	-0.114444	0.365737	0.361449	0.164166	-0.0293469			0.711593	-0.00265671	0.2353	-0.159327	0.150063	0.095276	0.0492549	-0.472134	0.0676265		Yes
PCRP_PhaseI	18651	EBF1	'1B1	K562	0.04		17849324	68.3245	71.0538	57		1			0.15739	0.126128			-0.590423	-0.116208	-0.385507	0.0206742	0.219108	0.247807			-0.703521	1.42092	NaN	-0.228732	-0.57654	NaN	-0.391795	0.185729	0.452972		Yes
PCRP_PhaseII	23794-24119	LCOR	'1B1	K562	9.24		22815786	87.9914	16.8203	16		1			0.113268	0.0161017			-0.530165	-0.899688	-0.825525	-0.578814	-0.884422	0.714188			-0.0516535	-1.38691	NaN	-0.109671	0.356372	NaN	0.701222	-0.718369	-0.57454		Yes
PCRP_PhaseII	23580-23933	BCL6	'1B1	K562	3.785		25443595	77.2439	29.5228	135		1			0.201686	0.00341826			-0.264903	-0.870531	-0.505304	-1.19656	-0.731094	0.622946			0.179702	-0.100263	NaN	-0.237623	0.21116	NaN	0.62531	-0.728698	-0.50855		Yes
PCRP_PhaseI	19142-19540	FOXC2	'1B1	K562	NaN		23929054	81.092	46.07	10135		1			-0.000284245	-0.268264			-0.778406	0.0619754	-0.46368	0.352977	0.494032	0.125306			-1.06763	1.61434	NaN	-0.220136	-0.722	NaN	-0.834444	-0.117688	0.669056		Yes
PCRP_PhaseI	19129	RFXANK	'1A9	K562	NaN		26855926	83.9316	29.0907	5218		1			0.405769	-0.23501			0.0448835	0.11534	-0.333226	-0.188753	0.662298	-0.115788			-0.282036	1.34826	NaN	-0.243613	-0.576617	NaN	-1.01459	-0.499065	0.769833		Yes
PCRP_PhaseI	18945	SIRT2	'1A8	K562	19.445		113045	75.8728	27.7274	3		1			0.245689	0.698723			1.48038	NaN	-1.16635	NaN	NaN	0.783763			1.85716	1.69611	NaN	NaN	-0.156329	NaN	NaN	NaN	NaN		No
PCRP_Phase0	18096	TP73	'1A8	K562	0.55		3119865	75.8565	79.2277	109		1			1.4262	0.640835			-0.958751	-0.148684	-0.779244	-0.16107	0.243609	0.388948			-1.27388	1.96557	NaN	-0.45472	-1.24899	NaN	-1.58412	0.628602	0.578933		Yes
PCRP_PhaseIII	26466-28239	ZNF354B	'1A8	K562	10.66		8602431	80.4075	58.1536	641		1			0.697409	0.415123			-0.60154	-0.0989634	-0.360342	0.368257	0.324183	0.202823			-0.866419	1.70135	NaN	-0.312743	-0.809106	NaN	-0.917796	0.0708821	0.603141		Yes
PCRP_PhaseI	17437-22045	YY2	'1A8	MCF7	1.73		3148198	71.3855	56.8155	20		1			1.27688	0.287019			1.32759	-0.227884	0.236431	0.424113	-0.133791	-0.00256347			1.28591	0.10738	-0.97059	-0.268885	0.0363964	0.0481709	0.114986	-0.356318	-0.11382		Yes
PCRP_PhaseI	18702	YBX1	'1A8	K562	375.895		30287775	86.1368	79.5057	39155		1			0.348814	0.272719			-0.761124	-0.0702805	-0.464963	0.219167	0.362333	0.231466			-1.07919	1.55441	NaN	-0.282096	-0.775529	NaN	-0.807129	0.525539	0.583981		Yes
PCRP_PhaseII	23787-24112	ZNF354B	'1A8	K562	10.66		15838584	88.6737	20.9764	844		1			0.18927	0.100969			-0.236492	-0.420262	-0.038658	0.574375	0.117457	0.229309			-0.157955	0.0667266	NaN	-0.274956	0.157987	NaN	0.264999	-1.26782	0.290855		Yes
PCRP_PhaseI	18305	ID2	'1A8	HepG2	404.485		4888722	44.3371	83.8046	3822		1			-0.13843	-0.0100636			-0.704724	-0.0932319	-0.54721	-0.235303	-0.231548	0.194867			-0.588622	0.277859	-0.903557	-0.108001	-0.219925	NaN	-0.899015	0.374153	-0.061417		Yes
PCRP_PhaseIII	28406-28667	HSF1	'1A8	K562	27.005		25229250	88.0781	40.7745	4365		1			-0.143683	-0.138633			-1.06373	-0.0554783	-0.499202	-0.117068	0.064657	0.322381			-1.09993	1.37031	NaN	-0.135341	-0.406692	NaN	-0.368634	-0.0797176	0.330662		Yes
PCRP_PhaseIII	28402-28665	HSF1	'1A8	K562	27.005		34186603	89.8714	35.7746	635		1			-0.273583	-0.181286			-1.00068	0.0754843	-0.418351	-0.119157	0.0615462	0.227751			-1.06484	1.22139	NaN	-0.0166157	-0.317331	NaN	-0.598411	-0.30386	0.342991		Yes
PCRP_PhaseIII	28398-28663	HSF1	'1A8	K562	27.005		29232559	89.5138	38.4312	225		1			-0.522188	-0.224137			-1.37265	0.0453835	-0.554004	-0.04816	0.0353351	0.309383			-1.4132	1.35066	NaN	-0.0575787	-0.374555	NaN	-0.411201	-0.107021	0.290403		Yes
PCRP_PhaseI	18383	DIS3	'1A7	K562	22.035		25685410	72.809	51.2119	208		1			0.864866	0.429393			0.845864	-0.915945	-0.584824	-0.166792	-0.691321	0.435112			0.863109	-0.530653	NaN	-0.324767	0.109905	NaN	0.58092	-0.441514	-0.526116		Yes
PCRP_PhaseIII	26453-28234	THAP4	'1A7	K562	18.17		5597618	70.0869	67.3535	147		1			0.629902	0.134961			-0.977074	-0.0487953	-0.712322	0.0815146	0.341087	0.307427			-1.21942	1.80614	NaN	-0.267037	-0.973979	NaN	-1.2874	0.261498	0.613497		Yes
PCRP_PhaseI	18306	GATA4	'1A7	HepG2	12.105		12107595	48.1269	81.8996	14272		1			0.00174199	0.0111813			-0.280767	0.027025	-0.0288541	-0.220177	-0.305041	0.0586431			-0.0440382	0.283236	-0.587416	-0.0472693	0.0490099	NaN	-0.273294	0.244142	-0.2434		Yes
PCRP_PhaseII	23829-24491	THAP4	'1A7	K562	18.17		4269035	87.557	66.4883	65		1			0.0922232	-0.0688678			-1.66299	-0.0487837	-1.01237	-0.188782	0.317762	0.417224			-2.06006	2.01032	NaN	-0.347691	-1.27817	NaN	-1.84585	0.512275	0.638028		Yes
PCRP_Phase0	18093	GRHL2	'1A6	K562	0		5524444	82.6784	74.0051	42		1			1.3412	0.578186			-0.25126	-0.179213	-0.553699	-0.169897	0.326086	0.261954			-0.62391	1.74677	NaN	-0.388698	-0.952328	NaN	-1.25397	0.268921	0.641724		Yes
PCRP_PhaseI	18406	ZSCAN25	'1A6	K562	NaN		18225861	62.2067	61.8473	300		1			1.03542	0.374024			0.926066	-0.61591	-0.297527	-0.238413	-0.471247	0.229165			0.877829	0.401865	NaN	-0.30436	-0.149192	NaN	0.221343	-0.345907	-0.200409		Yes
PCRP_PhaseII	24048	ZNF358	'1A6	K562	3.945		23443632	82.3797	19.4188	13		1			0.584464	0.335124			0.120772	-1.51353	-0.970144	-0.801895	-1.49294	0.797572			0.572604	-1.94378	NaN	-0.31826	0.372838	NaN	1.00631	-0.683972	-1.30533		Yes
PCRP_PhaseIII	26432	GRAMD4	'1A6	K562	20.61		29220970	88.3315	18.3473	17		1			0.120902	0.162509			-0.708201	-1.41025	-0.889552	-1.23786	-1.9289	0.870837			0.124207	-2.09722	NaN	-0.101629	0.432169	NaN	0.873496	-0.810511	-1.38422		Yes
PCRP_PhaseII	24030	ZMAT4	'1A6	K562	0		21333809	88.6862	16.7076	2		1			0.356718	0.15753			0.0269669	-1.34811	-0.892002	-1.5059	-1.89209	0.795583			0.488393	-2.18391	NaN	-0.162264	0.381169	NaN	0.896181	-0.786758	-1.37054		Yes
PCRP_PhaseII	23845	GRAMD4	'1A6	K562	20.61		27507880	85.9943	15.8975	9		1			0.130387	0.0520998			-0.657298	-1.55	-1.19334	-1.17742	-1.61066	0.908775			0.0340421	-2.43056	NaN	-0.164779	0.448842	NaN	1.05389	-0.760491	-1.30147		Yes
PCRP_PhaseI	18307	PROX1	'1A6	HepG2	6.795		14446401	52.6505	77.2948	10299		1			0.0422555	-0.0318265			0.0406411	0.0482234	-0.227009	-0.6163	-0.0464636	0.016499			0.00793718	0.0156938	-0.0619636	0.0627249	-0.0796493	NaN	-0.221088	0.0795243	-0.0253906		Yes
PCRP_PhaseII	24020	SHARPIN	'1A5	K562	15.26		23617651	80.304	24.0934	133		1			0.871151	0.37311			1.05309	-1.95262	-0.570378	-1.19589	-1.95106	0.628135			1.25502	-1.31897	NaN	-0.616247	0.257814	NaN	0.959895	-0.856503	-1.81298		Yes
PCRP_PhaseII	24021	ZNF155	'1A5	K562	0.09		23841732	87.3233	15.5225	1		1			0.216244	0.194069			-0.621634	-1.76311	-1.2907	-1.29115	-1.77274	0.943888			0.149388	-2.56966	NaN	-0.366475	0.480509	NaN	1.22414	-0.659536	-1.58646		Yes
PCRP_PhaseII	24057-24399	ZFP3	'1A5	K562	0		22271549	89.1034	36.8006	46		1			0.500717	0.147679			0.419007	-0.19616	0.0329895	-0.156574	-0.377986	0.0674295			0.519408	0.303674	NaN	-0.0518727	-0.0663485	NaN	-0.00279723	-0.663111	-0.0917325		Yes
PCRP_PhaseIII	26158-28313	YY1	'1A5	K562	27.435		15837847	52.9916	51.1785	164		1			0.158827	0.033255			-0.353956	-0.382942	-0.698897	-0.0893443	-0.326666	0.482687			-0.190417	0.185437	NaN	-0.118168	0.113572	NaN	0.36449	-1.01277	0.0703173		Yes
PCRP_PhaseII	23783-24108	IRF4	'1A5	K562	0.01		21165734	84.9385	19.3462	40		1			-0.145979	-0.00527536			-1.00534	-1.10444	-1.21714	-1.20896	-0.754327	0.83215			-0.347478	-1.02465	NaN	-0.105516	0.366417	NaN	0.886246	-0.740297	-0.686005		Yes
PCRP_PhaseI	18323	T	'1A5	HepG2	0		2479592	41.7201	88.943	70		1			-0.179192	-0.187914			-0.975863	-0.171418	-0.593504	-0.264953	-0.432362	0.263998			-0.913644	0.377327	-1.04036	-0.172231	-0.322733	NaN	-1.07103	0.462248	-0.0883121		Yes
PCRP_PhaseI	18697	NFX1	'1A4	K562	23.15		7691309	83.5716	82.8711	60		1			0.145666	0.220759			-1.69635	-0.159013	-0.997707	-0.106058	0.372201	0.453298			-2.18287	2.01088	NaN	-0.427814	-1.33506	NaN	-1.74622	0.619131	0.704349		Yes
PCRP_PhaseII	24041-24391	ZNF689	'1A4	K562	5.44		31215222	82.93	25.5064	49		1			0.374995	0.182437			0.179958	-0.700098	-0.239794	-0.227115	-0.604823	0.43401			0.334216	-0.466627	NaN	-0.191542	0.229985	NaN	0.572044	-1.00312	-0.385549		Yes
PCRP_PhaseII	22840-23317	PRMT7	'1A4	K562	44.36		10567979	87.4007	59.1183	68		1			-0.102078	-0.0507184			-1.21102	-0.0505992	-0.526097	-0.154789	0.319567	0.293978			-1.67479	1.77074	NaN	-0.255802	-0.851467	NaN	-1.29667	0.255961	0.593479		Yes
PCRP_PhaseI	18738	ZNF784	'1A4	HepG2	2.795		13146302	56.9598	68.224	1815		1			-0.119166	-0.135908			-0.232429	-0.393242	-0.483687	-1.42326	-0.534354	0.306686			-0.267075	0.138626	-0.0385667	-0.267416	-0.191854	NaN	0.179378	0.722486	-0.1296		Yes
PCRP_PhaseII	24051-24396	ZNF212	'1A3	K562	6.375		20345638	76.3561	44.4748	7344		1			0.357122	0.198275			-0.298886	-0.189716	-0.126208	0.160109	0.307334	0.143092			-0.397344	1.23176	NaN	-0.35224	-0.339412	NaN	-0.531849	0.0311781	0.359042		Yes
PCRP_PhaseII	23810-24135	SMARCC2	'1A3	K562	34.09		25537458	86.0904	16.5316	71		1			0.464575	0.147987			0.1322	-1.39481	-0.611635	-1.35562	-1.77817	0.742364			0.633453	-1.88855	NaN	-0.188131	0.345922	NaN	0.982677	-0.853948	-1.45593		Yes
PCRP_PhaseII	22865	ZNF200	'1A3	K562	3.465		19423071	83.3027	24.0059	28		1			0.354074	0.0750039			-0.0163352	-0.866617	-0.609915	-0.500828	-0.574484	0.591771			0.350573	-1.13864	NaN	-0.0563115	0.241447	NaN	0.685946	-0.546219	-0.631123		Yes
PCRP_PhaseII	23815	CSTF2T	'1A3	K562	9.04		21291187	86.7705	27.368	125		1			-0.129814	0.0053129			-0.60296	-0.994526	-0.575092	-1.00367	-1.57924	0.737551			0.0957898	-1.67669	NaN	0.0288131	0.340221	NaN	0.875515	-0.503538	-1.25422		Yes
PCRP_PhaseII	22193-22785	ARNT2	'1A3	K562	0.005		20308765	87.192	20.5296	3		1			-0.194131	-0.0711446			-0.98553	-0.330544	-0.616281	-0.713966	-0.111092	0.491829			-0.631777	-0.235714	NaN	0.0737022	0.217442	NaN	0.206663	-0.927279	-0.0711205		Yes
PCRP_PhaseII	22216-22803	ELF1	'1A3	K562	22.205		13406400	71.901	44.6295	237		1			0.30316	-0.136569			-0.537423	-0.300469	-0.693236	-0.200172	-0.15815	0.4545			-0.294442	1.29855	NaN	-0.224116	-0.373524	NaN	-0.353085	-0.0955199	0.160757		Yes
PCRP_PhaseII	22219-22806	NR3C2	'1A3	K562	0.13		24433691	85.5693	19.8074	554		1			-0.130859	-0.181609			-0.710995	-0.663971	-1.01312	-1.30698	-0.623896	0.690734			0.0297716	0.14061	NaN	-0.0447058	0.0350097	NaN	0.291297	0.38689	-0.81046		Yes
PCRP_PhaseI	18367	CIZ1	'1A2	K562	77.42		41381771	66.5502	41.826	4799		1			1.23173	0.52654			1.49904	-1.09975	-0.199009	-0.448472	-1.38116	0.191328			1.56128	-0.982053	NaN	-0.372011	0.00216427	NaN	0.372027	-0.70034	-1.15862		Yes
PCRP_PhaseIII	26454	T	'1A2	K562	0		19191831	86.9655	17.4732	217		1			0.537222	0.25824			0.413462	-0.975252	0.41861	-0.691319	-1.41553	0.296017			0.706192	-2.04667	NaN	-0.199561	0.391476	NaN	0.53259	-1.34745	-1.22882		Yes
PCRP_PhaseII	24046	NFYB	'1A2	K562	20.86		16866937	80.1381	24.6781	28		1			0.708775	0.24764			0.601697	-1.29248	-0.496176	-0.979068	-1.35977	0.607067			0.754677	-1.66086	NaN	-0.372526	0.309224	NaN	0.793688	-0.631305	-0.911467		Yes
PCRP_PhaseIII	26465-28238	SIRT2	'1A2	K562	19.445		4645181	60.1699	79.4856	885		1			0.172937	0.211932			-1.46708	-0.0651543	-0.883009	-0.166879	0.293023	0.396669			-1.89069	1.98658	NaN	-0.4259	-1.27115	NaN	-1.57003	0.804566	0.504961		Yes
PCRP_PhaseI	18946	SMAD3	'1A2	K562	11.535		271802	79.7632	23.9987	3		1			0.560347	0.180133			NaN	-0.728023	-2.16635	NaN	0.603638	0.783763			1.17909	1.28108	NaN	-1.26766	-1.47826	NaN	NaN	1.66996	0.136514		No
PCRP_PhaseII	23588	TAF10	'1A2	K562	NaN		19363720	79.0196	22.6677	35		1			0.199073	0.147028			-0.419831	-0.841474	-0.709654	-0.486294	-0.697864	0.659537			0.100706	-1.23788	NaN	-0.0065057	0.278465	NaN	0.810754	-0.712535	-0.591541		Yes
PCRP_PhaseIII	26311	CIZ1	'1A2	K562	77.42		19415446	83.5366	26.7795	31		1			0.116526	0.135853			-0.450184	-0.679118	-0.627256	-0.422482	-0.918174	0.623646			0.116351	-0.635115	NaN	-0.0753247	0.260512	NaN	0.581784	-0.705662	-0.584474		Yes
PCRP_PhaseII	22630	PPP1R10	'1A2	K562	14.635		37037346	77.3107	26.886	787		1			0.479433	0.122828			0.645122	-1.02987	-0.269009	-1.09871	-1.84633	0.51834			0.991373	-1.9815	NaN	0.0254177	0.222334	NaN	0.538996	-0.794254	-1.58785		Yes
PCRP_PhaseII	23531-23902	T	'1A2	K562	0		22464416	85.6939	17.6422	80		1			0.49656	0.111863			0.312716	-1.06402	-0.0568441	-0.599167	-1.20817	0.500236			0.645635	-1.68268	NaN	-0.24543	0.376542	NaN	0.464422	-1.0932	-1.03707		Yes
PCRP_PhaseII	23527-23898	SIRT2	'1A2	K562	19.445		6660169	84.7703	52.6154	721		1			-0.0792861	-0.11403			-1.39136	0.0271744	-0.799046	-0.00693034	0.337363	0.319848			-1.55099	1.72897	NaN	-0.390777	-0.916071	NaN	-1.09424	0.973632	0.329738		Yes
PCRP_PhaseII	23855-24501	ZNF581	'1A12	K562	12.82		9224992	84.5811	52.1846	263		1			0.274654	0.126128			-0.509546	-0.043653	-0.289997	0.469053	0.247128	0.152835			-0.808029	1.50267	NaN	-0.303245	-0.522519	NaN	-0.607285	-0.0691926	0.475032		Yes
PCRP_PhaseII	24027	NFYC	'1A11	K562	34.865		28386383	87.7263	15.8673	52		1			0.542866	0.294572			0.389389	-1.26857	-0.461789	-1.03823	-1.68258	0.650353			0.754549	-2.4679	NaN	-0.239615	0.377584	NaN	0.698763	-0.907698	-1.37581		Yes
PCRP_PhaseII	22622	RFX2	'1A11	K562	5.735		32660114	80.7359	25.66	50		1			0.333789	0.129845			-0.0110014	-0.925761	-0.573434	-0.996404	-0.91095	0.628058			0.251172	-1.28439	NaN	-0.0786773	0.327027	NaN	0.68336	-0.687454	-0.916377		Yes
PCRP_PhaseII	23850	USF2	'1A11	K562	40.44		18611191	78.2569	27.0176	2732		1			0.997571	0.126065			1.54523	-1.73474	0.523285	0.461026	-1.19899	-0.0640711			0.82178	-1.68829	NaN	-1.11107	0.52998	NaN	0.598146	-1.44308	-1.20523		Yes
PCRP_PhaseII	23847	ZNF98	'1A11	K562	0.005		17054587	86.5321	22.7421	2450		1			-0.0237332	-0.0404955			-1.39224	-0.0983884	-1.20132	-1.02916	-0.754412	0.588353			-1.09142	0.88768	NaN	-0.277359	-0.251892	NaN	-0.01835	1.1493	-0.349308		Yes
PCRP_PhaseII	22200-22790	STAT5A	'1A11	K562	99.875		7622272	84.3993	49.2704	931		1			0.160667	-0.0441832			-0.858979	-0.112135	0.178733	-0.250881	0.208673	0.0817769			-1.39363	1.51761	NaN	-0.365422	-0.380356	NaN	-1.23694	-0.199392	0.489385		Yes
PCRP_PhaseII	23537-23908	KDM1A	'1A10	K562	149.18		24132744	83.9571	18.044	164		1			0.584911	0.247818			0.400824	-1.06946	-0.395508	-0.39311	-2.1563	0.606217			1.07018	-2.16616	NaN	0.0546453	0.220936	NaN	0.66919	-1.10658	-1.84861		Yes
PCRP_PhaseIII	26434	MLXIP	'1A10	K562	10.85		27480966	85.8131	20.0887	28		1			-0.0997569	0.0860604			-1.0943	-1.34779	-1.16349	-1.02935	-1.51228	0.902485			-0.178417	-1.88347	NaN	-0.0862508	0.450797	NaN	0.985149	-0.862675	-1.31999		Yes
PCRP_PhaseII	23522-23893	MLXIP	'1A10	K562	10.85		21859502	79.2861	21.991	21		1			0.0330897	0.00209825			-0.872401	-1.14252	-1.16017	-1.45403	-1.11687	0.846021			-0.293299	-1.15304	NaN	-0.139655	0.388627	NaN	0.898553	-0.676252	-0.81434		Yes
PCRP_PhaseI	17488	ZNF143	'1A10	K562	34.97		4712116	79.6936	81.3818	107		1			0.364148	-0.00355692			-0.367551	-0.252203	-1.02343	-0.438176	0.383433	0.396369			-1.37438	1.872	NaN	-0.500464	-1.1039	NaN	-1.39825	0.608533	0.676944		Yes
PCRP_PhaseIII	28401	HSF1	'1A10	K562	27.005		19262392	81.7429	27.954	1236		1			0.156965	-0.0451024			-0.55377	-0.718555	-0.528579	-0.28237	-0.14489	0.554935			-0.335276	0.467785	NaN	-0.297675	0.0639621	NaN	0.408673	-0.316894	0.0166554		Yes
PCRP_PhaseIII	28405	HSF1	'1A10	K562	27.005		15957926	83.909	29.331	1746		1			0.0495549	-0.0596649			-0.719801	-0.629276	-0.266997	0.123643	0.00306671	0.458721			-0.485143	1.00369	NaN	-0.431346	-0.145892	NaN	0.241165	0.0267008	0.147581		Yes
PCRP_PhaseII	23562-23921	MEIS3	'1A10	K562	0.32		26112715	85.817	29.4724	35		1			-0.0644719	-0.0729369			-0.538864	-0.37931	-0.423133	-0.305935	-0.390639	0.454312			-0.173158	0.266815	NaN	-0.0142334	0.0817568	NaN	0.228729	-0.658265	-0.163317		Yes
PCRP_PhaseIII	28397	HSF1	'1A10	K562	27.005		19850739	84.5662	27.1907	374		1			-0.237497	-0.107238			-1.20526	-0.600089	-0.92933	-0.284043	-0.429921	0.668928			-0.726813	0.109392	NaN	-0.0928915	0.163875	NaN	0.446405	-0.429373	-0.0798232		Yes
PCRP_PhaseII	22858	DDIT3	'1A10	K562	68.57		20486676	83.7664	20.3706	9		1			-0.232017	-0.143776			-1.25138	-0.708631	-1.05642	-0.693424	-0.786205	0.74727			-0.454234	-0.596847	NaN	-0.0508618	0.313278	NaN	0.708723	-0.799811	-0.482197		Yes
PCRP_PhaseI	18999	HSF5	'1A1	K562	0		9449034	67.3043	92.8952	31380		1			0.881924	0.60722			-1.08106	-0.124382	-0.890412	0.00916417	0.339887	0.387559			-1.56758	1.93597	NaN	-0.396999	-1.27111	NaN	-1.41613	0.661141	0.646231		Yes
PCRP_PhaseIII	26451	NACC1	'1A1	K562	23.535		19944220	84.2376	19.2343	148		1			0.807897	0.365053			0.837276	-0.972085	0.103784	-0.185711	-1.17631	0.293541			1.17487	-1.81467	NaN	-0.214497	0.206163	NaN	0.595932	-1.28937	-0.959233		Yes
PCRP_PhaseII	24032-24387	ZNF385B	'1A1	K562	0.03		27465918	86.9278	28.4045	51911		1			0.12483	0.0856961			-0.623157	0.477324	-0.125951	-0.139543	0.243774	-0.273242			-1.12783	1.57939	NaN	-0.000615785	-0.426721	NaN	-1.11664	-0.505104	0.0540422		Yes
PCRP_PhaseII	22183	GLI1	'1A1	K562	0.465		20539918	80.8497	21.5956	179		1			0.190994	0.0713292			-0.397595	-0.831006	-0.286455	-0.568438	-0.678463	0.570169			0.090161	-0.399511	NaN	-0.134636	0.22645	NaN	0.434324	-0.533705	-0.420481		Yes
PCRP_PhaseII	22619	ONECUT2	'1A1	K562	0.525		13902880	81.3234	52.1651	102		1			-0.169547	-0.0243187			-0.203892	-0.539435	-0.631396	-0.0944654	-0.26949	0.496718			-0.308178	0.802852	NaN	-0.30709	-0.133115	NaN	0.463587	0.2792	-0.106495		Yes
PCRP_PhaseII	22841	ETV7	'1A1	K562	0.02		18777131	86.6251	21.0913	12		1			0.00178436	-0.0398469			-0.934954	-0.921593	-1.00555	-1.57132	-1.00938	0.788407			-0.178986	-0.963066	NaN	-0.0474668	0.291516	NaN	0.719969	-0.686447	-0.392429		Yes
PCRP_PhaseII	22857	HOPX	'1A1	K562	0		18190185	84.3506	21.2122	8		1			0.187869	-0.0531862			-0.568305	-0.971326	-1.11826	-1.55447	-0.876281	0.77759			0.0650852	-1.11753	NaN	-0.0878339	0.31534	NaN	0.664194	-0.627951	-0.642779		Yes
PCRP_PhaseI	19139-19538	DGCR8	'1A1	K562	73.555		17220460	84.1342	51.4091	649		1			-0.164033	-0.31943			-1.33855	0.0223164	-0.768489	0.0741864	0.346927	0.309054			-1.66143	1.89387	NaN	-0.289663	-1.06692	NaN	-1.20432	0.348793	0.601718		Yes
PCRP_Phase0	18101	GRHL2	'1A6	K562	0		570757	82.3952	76.3865	-		0			1.10081	0.216069			NaN	NaN	NaN	NaN	NaN	NaN			nan	nan	NaN	nan	nan	NaN	nan	nan	nan		No
PCRP_Phase0	18104	TP73	'1A8	K562	0.55		680348	77.3652	79.4994	1		0			1.36542	0.537269			-1.04381	-0.161987	-0.813226	-0.188291	0.361091	0.387461			-1.41446	1.90816	NaN	-0.447198	-1.27268	NaN	-1.50545	0.879071	0.561961		No
PCRP_Phase0	18120	TP73	'1A8	MCF7	1.345		16991496	78.4401	71.3218	4460		0			0.752368	0.19675			1.2084	-0.162331	0.245929	0.311971	0.13509	-0.0416852			1.04952	-0.032743	0.668529	-0.235391	0.0852479	0.058532	0.352314	0.071703	-0.027938		No
PCRP_Phase0	18102	NRF1	'3H1	K562	17.895		548851	84.1948	77.2209	-		0			1.46418	0.587711			NaN	NaN	NaN	NaN	NaN	NaN			nan	nan	NaN	nan	nan	NaN	nan	nan	nan		No
PCRP_Phase0	18103	PAX2	'1A7	K562	0		495741	76.7951	80.9542	1		0			0.881057	0.503566			-1.35444	-0.121613	-1.0074	-0.161081	0.386574	0.41932			-1.81354	2.02363	NaN	-0.362923	-1.35934	NaN	-1.5231	0.596818	0.598702		No
PCRP_Phase0	18119	PAX2	'1A7	MCF7	0.025		13042627	74.3555	73.4397	2970		0			0.468658	0.0457582			0.851359	-0.116961	0.293058	0.225027	-0.0461336	-0.0270788			0.726415	0.0041783	0.798892	-0.19377	0.156785	0.00282266	0.142738	0.0394024	-0.0717547		No
PCRP_Phase0	18122	YY1	'1C2	MCF7	58.11		17334055	81.0838	70.3459	6509		0			0.633046	0.102065			1.19661	-0.136179	0.0640137	0.397223	0.136047	-0.0355978			1.02556	-0.00360025	1.23853	-0.183331	-0.0241949	0.155185	0.303401	0.0703092	-0.0526816		No
PCRP_Phase0	15404	HSF2	'2C1	K562	43.27		3590698	68.1589	44.7281	0		0			-0.839464	-0.74176			-1.86685	-0.197508	-0.928619	-0.37448	0.0219433	0.523997			-1.77738	2.1257	NaN	-0.554278	-1.14597	NaN	-0.675726	0.312951	0.340218		No
PCRP_Phase0	16666	USF1	'1B8	MCF7	20.76		3608593	65.5037	72.5988	23		0			0.630917	-0.0390323			0.609425	-0.411652	-0.22868	-0.226521	-0.384683	0.16956			0.509776	0.313606	-0.198398	-0.36002	-0.363476	-0.00764216	-0.423464	0.00682748	-0.169709		No
PCRP_Phase0	15414	TP73	'1A8	K562	0.55		1936838	60.1603	77.7018	35		0			-0.434552	-0.530606			-2.08619	-0.270396	-1.60315	-0.727084	0.0156972	0.644382			-2.56084	2.24114	NaN	-0.643353	-1.83737	NaN	-2.11906	1.11178	0.360836		No
PCRP_Phase0	15407	NFATC1	'1F4	K562	1.325		7097986	79.0308	32.3005	1		0			-0.17607	-0.983894			-0.623312	-0.465392	-1.77819	0.190986	-0.252126	0.657352			-0.539258	1.12977	NaN	-0.407739	-0.521042	NaN	0.0218279	1.16251	-0.0147953		No
PCRP_Phase0	16628	ELK1	'1D9	MCF7	9.425		4148214	70.1341	68.5682	1		0			0.269496	-0.155328			0.234329	-0.252843	0.11794	-0.347652	0.082379	0.0888111			0.122432	0.219943	0.311604	-0.301727	-0.0480581	0.319138	-0.498425	-0.279497	-0.0481628		No
PCRP_Phase0	16660	ELK1	'1D9	MCF7	9.425		2669966	68.5139	64.7461	0		0			-0.388	-0.42446			-0.484271	-0.354726	-0.0552136	-0.635524	-0.251796	0.179868			-0.6541	0.330541	-0.400076	-0.33687	-0.272212	0.13102	-0.922303	0.0482678	-0.151386		No
PCRP_Phase0	15402	ELK1	'1D9	K562	17.195		3285558	68.3425	72.0233	12		0			-0.397736	-0.690687			-2.2132	-0.29111	-1.35121	-0.931778	-0.076744	0.643265			-2.60085	2.25027	NaN	-0.575356	-1.6848	NaN	-2.49583	0.910655	0.364692		No
PCRP_Phase0	16627	ATF2	'1B4	MCF7	18.37		7915258	66.6764	66.9679	21		0			0.301443	-0.174048			0.547481	-0.172748	0.00322843	-0.291954	-0.0910045	0.0621176			0.508007	0.145725	0.0988647	-0.135337	-0.12981	0.0924592	-0.351961	-0.0728285	-0.0892412		No
PCRP_Phase0	16659	ATF2	'1B4	MCF7	18.37		3993882	64.593	66.2038	0		0			-0.330755	-0.479111			-0.257601	-0.293912	-0.136527	-0.63382	-0.547898	0.173102			-0.299624	0.336531	-1.26087	-0.245302	-0.243151	0.195126	-0.962644	0.010988	-0.24709		No
PCRP_Phase0	15411	STAT5A	'1A11	K562	99.875		12377863	79.3955	26.5561	4		0			-0.262604	-1.04638			-0.89243	-0.827814	-1.42368	-1.24806	-1.13174	0.815938			-0.490149	0.506343	NaN	-0.730447	-0.0502767	NaN	-0.629503	1.16653	-0.103884		No
PCRP_Phase0	15410	SMARCC1	'1F1	K562	39.685		10587724	80.9386	28.3886	0		0			-0.165446	-1.02489			-1.79646	-1.83494	-1.85823	-0.567125	0.201267	0.921961			-0.228992	0.375493	NaN	-0.353813	-0.131454	NaN	-0.404873	0.84684	0.143467		No
PCRP_Phase0	16630	FOXM1	'2E6	MCF7	35.995		2090878	57.9593	75.0703	4		0			-0.434945	-0.180373			-0.569051	-0.420379	-0.688423	-0.657634	-0.444272	0.245369			-0.768098	0.426127	-0.473716	-0.340341	-0.542832	0.0822545	-1.15821	0.13695	-0.258803		No
PCRP_Phase0	15400	FOXM1	'2E6	MCF7	35.995		25938209	85.5043	50.8358	0		0			-0.57832	-0.297482			-0.860551	0.00444145	-0.396336	-0.533297	-0.251331	0.0717714			-0.807818	0.0570878	-0.198313	0.110149	-0.250607	-0.0660835	-0.502539	0.134803	-0.0229962		No
PCRP_Phase0	16662	FOXM1	'2E6	MCF7	35.995		1244844	63.7698	69.5556	1		0			-1.20361	-0.594343			-0.796148	-0.426059	-0.195573	-1.09871	-0.681816	0.239068			-0.456942	0.456967	NaN	-0.494508	-0.505369	-0.396297	-1.15872	0.197713	-0.261973		No
PCRP_Phase0	15406	KLF1	'1C6	K562	32.07		8954980	80.0632	30.6728	1		0			-0.17324	-1.03935			-1.09995	-0.916037	-1.10283	-0.285653	0.296326	0.677363			-0.534318	1.16523	NaN	-0.480802	-0.445242	NaN	-0.899232	1.03055	0.160069		No
PCRP_Phase0	16629	HMGB1	'1E4	MCF7	645.295		2826711	65.3837	72.3325	1		0			0.0261154	-0.148966			-0.269572	-0.386719	-0.376987	-0.26728	-0.268254	0.200492			-0.345603	0.351068	-1.24483	-0.308618	-0.435107	0.155026	-0.597127	-0.0145778	-0.14471		No
PCRP_Phase0	16661	HMGB1	'1E4	MCF7	645.295		1884985	63.0266	68.3008	0		0			-0.716448	-0.33044			-0.723164	-0.447821	-0.467129	-0.564146	-0.40309	0.241885			-0.683591	0.391904	-1.45423	-0.435489	-0.449144	0.076867	-0.991885	0.0542054	-0.128506		No
PCRP_Phase0	15403	HMGB1	'1E4	K562	238.37		2705753	65.3175	76.2542	13		0			-1.01942	-0.553739			-2.71812	-0.334643	-1.60119	-0.528976	0.0291983	0.67676			-3.0585	2.2749	NaN	-0.621282	-1.82859	NaN	-2.24743	0.972509	0.423616		No
PCRP_Phase0	15412	TGIF1	'2G6	K562	34.33		2010466	67.6155	71.4754	3		0			-1.25224	-0.866946			-2.56886	-0.336167	-1.509	-0.865597	0.0616019	0.665549			-2.90443	2.32214	NaN	-0.798688	-1.81054	NaN	-2.63285	0.894637	0.472629		No
PCRP_Phase0	16665	NRF1	'3H1	MCF7	9.825		4908666	58.3114	74.39	359		0			0.561319	-0.238801			0.828864	-0.250114	0.0391066	-0.341909	-0.126272	0.0740992			0.860575	0.168691	-0.173098	-0.180743	-0.0447683	-0.183712	-0.61184	-0.157863	-0.147126		No
PCRP_Phase0	16657	NRF1	'3H1	MCF7	9.825		8507534	61.8243	63.1449	23		0			0.172442	-0.401804			0.505356	-0.0158562	0.298932	-0.570092	-0.132135	-0.0191961			0.569176	0.0903689	-0.547638	-0.043981	0.135757	0.0448586	-0.73571	-0.371938	-0.109999		No
PCRP_Phase0	15399	NRF1	'3H1	K562	17.895		1871798	59.1701	76.294	9		0			0.208652	-0.663135			-1.21004	-0.389944	-1.55338	-0.581093	-0.0217574	0.643795			-1.98101	2.29012	NaN	-0.743729	-1.71739	NaN	-2.82931	0.865343	0.383474		No
PCRP_Phase0	15397	PAX2	'1A7	K562	0		836832	53.3498	78.2593	2		0			-1.10585	-0.736368			-2.4055	-0.312545	-1.49358	-0.351532	-0.00982299	0.655129			-2.93723	2.23945	NaN	-0.643202	-1.73745	NaN	-2.40081	0.99292	0.451938		No
PCRP_Phase0	16664	YY1	'1C2	MCF7	58.11		58792862	74.971	41.6195	3174		0			0.030361	-0.15685			0.399751	-0.336214	-0.218319	-0.499579	0.134002	0.124191			0.310342	0.0494024	0.880605	-0.398328	-0.212759	0.0446431	-0.162788	0.14568	0.201953		No
PCRP_Phase0	16656	YY1	'1C2	MCF7	58.11		37863254	61.0254	44.5313	786		0			-0.564481	-0.453242			-0.805978	-0.265324	-0.592214	-1.15363	-0.269127	0.188303			-0.864161	0.179258	0.393695	-0.235496	-0.440402	-0.051284	-0.856084	0.166818	0.115478		No
PCRP_Phase0	15398	YY1	'1C2	K562	27.435		5417403	67.849	66.0618	10		0			-1.00358	-0.556615			-2.36497	-0.356976	-1.40121	-0.451139	0.0170202	0.657229			-2.41147	2.16122	NaN	-0.60894	-1.42497	NaN	-1.33582	0.829185	0.394421		No
PCRP_Phase0	15405	IRF3	'6C8	K562	37.375		12474851	75.9409	30.2179	7657		0			-0.300974	-0.945433			-1.25242	0.253933	-0.683932	-0.148614	0.874176	0.00726684			-1.70972	1.81313	NaN	-0.135474	-1.14103	NaN	-1.90352	-0.246828	0.99059		No
PCRP_PhaseI	19066	ELF3	'8F6	K562	0.415		460101	72.5418	79.2544	0		0			0.974313	0.370956			-0.954664	-0.0380328	-1.1039	0.231603	0.49476	0.337182			-1.3975	1.92363	NaN	-0.344631	-1.29271	NaN	-1.39363	0.55323	0.689876		No
PCRP_PhaseIII	28260-28317	ELF3	'8F6	K562	0.415		5580972	76.8245	70.0935	25		0			0.306559	0.106914			-1.1271	0.014187	-0.70541	-0.115566	0.261492	0.305693			-1.43278	1.85715	NaN	-0.264641	-0.989815	NaN	-1.46329	0.415604	0.489188		No
PCRP_PhaseI	18949	DAXX	'8B5	K562	17.085		499504	83.4836	19.7569	3		0			0.565877	0.321951			-0.463037	-0.501515	-0.109769	NaN	-0.602813	0.451782			0.721103	0.560053	NaN	-0.62611	-0.0641215	NaN	-1.52517	-0.273454	0.193098		No
PCRP_PhaseI	19052	DAXX	'8B5	K562	17.085		13246615	83.6928	65.3937	18		0			0.358981	0.238645			-0.439588	-0.175503	-0.516154	0.283563	0.214639	0.285809			-0.641047	1.25784	NaN	-0.196218	-0.480125	NaN	-0.282901	0.284715	0.389559		No
PCRP_PhaseII	22876-23328	NFKB2	'7H5	K562	5.42		3736311	58.9542	83.6332	59		0			0.177512	-0.0435413			-1.53145	-0.0117695	-0.882406	-0.210085	0.392979	0.357216			-1.94091	1.9059	NaN	-0.304675	-1.13596	NaN	-1.50772	0.507463	0.642205		No
PCRP_PhaseI	17422	SMARCC2	'7B6	MCF7	63.88		17796646	79.3994	42.0412	3		0			0.538416	0.168036			0.844225	-0.00597831	0.0438264	0.317971	-0.067194	-0.0453329			0.740174	-0.120676	0.569245	0.0630744	-0.0274804	0.137493	0.279025	-0.328486	0.106041		No
PCRP_Phase0	15415	NFATC1	'7A6	K562	1.325		2859434	60.6814	71.5731	6		0			-1.37107	-1.00554			-2.78497	-0.406824	-1.64071	-0.481629	0.0250398	0.703265			-2.9581	2.31099	NaN	-0.769336	-1.77721	NaN	-2.05306	0.99766	0.33506		No
PCRP_PhaseI	17426-22036	ZNF217	'5H9	MCF7	97.365		10295360	85.4939	46.7032	1		0			0.90086	0.236941			1.22761	-0.0847387	0.367637	0.529114	0.18793	-0.0946529			1.14985	-0.118907	0.413472	-0.118782	0.238199	0.00596863	0.360731	-0.566638	0.0846429		No
PCRP_PhaseII	23564-23923	BSX	'5H1	K562	0		1481925	82.6325	78.9642	1		0			-0.104638	-0.0315211			-1.46951	-0.0749084	-0.990559	-0.160134	0.353444	0.40858			-1.97594	1.98732	NaN	-0.393148	-1.26131	NaN	-1.86596	0.459902	0.732569		No
PCRP_PhaseI	19166	ZNF140	'5C1	K562	4.37		3362884	79.4849	30.0665	15		0			-0.054614	-0.288126			-0.536172	-0.000413219	-0.574094	-0.0438015	0.106461	0.252639			-0.628809	1.66504	NaN	-0.344824	-0.692928	NaN	-0.603777	0.326008	0.229965		No
PCRP_PhaseII	23547-23917	ELF2	'5A5	K562	31.605		3145126	88.7516	69.3152	3		0			-0.390506	-0.0441454			-1.65217	-0.00421406	-0.898234	-0.342985	0.333777	0.376399			-2.12419	1.97153	NaN	-0.280949	-1.19954	NaN	-1.42273	0.492452	0.574145		No
PCRP_PhaseI	18987	FLI1	'4H6	K562	NaN		1250934	61.4062	87.5324	6		0			0.547785	0.544418			-1.3995	-0.169673	-1.03957	-0.15246	0.20834	0.477258			-1.82638	2.08582	NaN	-0.528909	-1.39718	NaN	-1.32872	0.718723	0.524837		No
PCRP_PhaseII	22602-23048	PIKFYVE	'4G10	K562	13.485		17512210	86.943	44.342	37		0			-0.213056	-0.126392			-1.11328	0.0654096	-0.586032	-0.0430647	0.274156	0.245953			-1.23684	1.59446	NaN	-0.0435944	-0.674612	NaN	-0.943295	-0.20211	0.524259		No
PCRP_PhaseII	22223-22810	PRRX2	'4F12	K562	0.01		23128137	88.8868	21.1575	3		0			-0.617751	-0.288698			-1.88086	-0.6388	-1.13527	-1.3036	-0.56359	0.756064			-0.894092	-0.09821	NaN	0.0459093	0.248126	NaN	0.486421	-0.90823	-0.281543		No
PCRP_PhaseI	17402	HMGB1	'4F10	MCF7	645.295		28580124	83.5942	31.3195	170		0			0.674946	0.289717			1.01053	-0.0587899	0.0555543	0.364004	-0.159987	-0.0325601			0.849497	-0.09729	0.756931	0.0274701	-0.0769693	-0.235536	0.292984	-0.22632	0.098747		No
PCRP_PhaseII	23831	L3MBTL4	'4D1	K562	0		22081707	83.4267	28.1501	23		0			0.0914847	0.0739798			-0.369473	-1.16867	-0.962906	-1.28698	-1.35911	0.798948			0.00717363	-1.60377	NaN	-0.0705883	0.342751	NaN	0.916729	-0.380897	-0.974217		No
PCRP_PhaseII	22960	PGBD1	'4C8	K562	4.705		15607548	86.4723	28.8325	16		0			-0.0861548	-0.0521311			-0.499496	-1.12294	-0.858946	-0.245912	-0.973478	0.759399			0.0718957	-1.113	NaN	-0.163483	0.296254	NaN	0.803782	-0.321151	-0.651385		No
PCRP_PhaseI	19085	KBTBD10	'4B8	K562	NaN		14351159	76.2631	54.5226	26		0			-0.262596	-0.180968			-0.701824	-0.18776	-0.889124	-1.20945	-0.698859	0.529246			-0.979991	1.54817	NaN	-0.374572	-0.439419	NaN	-0.108204	0.66707	-0.420314		No
PCRP_PhaseII	24026	NACC2	'4B7	K562	3.44		24623929	88.0943	16.8995	73		0			0.604662	0.259913			0.639307	-1.50267	-0.437649	-1.24935	-2.2299	0.653744			1.0293	-2.4893	NaN	-0.270549	0.338104	NaN	0.706004	-0.872612	-1.91601		No
PCRP_PhaseII	22180-22778	MED21	'4B5	K562	NaN		3683488	84.4474	73.1089	9		0			-0.0138986	0.00122435			-1.59397	-0.0530324	-0.939148	-0.167595	0.396544	0.388801			-2.01027	1.9697	NaN	-0.346594	-1.24698	NaN	-1.67284	0.474568	0.70347		No
PCRP_PhaseII	22591-23038	ZNF18	'4B5	K562	3.285		5090018	87.8101	59.1415	1		0			-0.452121	-0.165427			-1.85631	-0.0758132	-1.00421	-0.282666	0.308158	0.440253			-2.2151	2.00366	NaN	-0.350858	-1.23393	NaN	-1.82879	0.426558	0.67744		No
PCRP_PhaseII	23576-23930	TSC22D4	'4A4	K562	10.175		14870058	87.1092	27.9852	0		0			-0.383216	-0.244486			-1.35436	-0.0803249	-0.636692	-0.197175	-0.100815	0.410585			-1.00859	1.16691	NaN	-0.0538282	-0.217786	NaN	-0.125577	-0.546959	0.211679		No
PCRP_PhaseI	18415	ANAPC2	'3H7	MCF7	30.94		11572632	65.263	61.4789	65		0			-0.119976	-0.182617			0.140222	-0.0104812	0.540657	0.0704789	0.216303	-0.0818765			0.335872	-0.0723925	-0.252563	-0.0978334	0.393482	-0.0552046	-0.144503	-0.296096	0.0269579		No
PCRP_PhaseIII	26427	THAP7	'3H4	K562	52.575		28776369	85.4647	22.2741	188		0			0.594992	0.208682			0.297487	-1.55684	-0.574179	-1.453	-1.98753	0.741527			0.804186	-1.75306	NaN	-0.259881	0.332854	NaN	0.754219	-0.812877	-1.42261		No
PCRP_PhaseII	22629-23058	ANAPC2	'3H3	K562	12.28		11231422	79.764	56.2866	26		0			0.19042	0.115004			-0.914739	-0.0486734	-0.612961	-0.0233641	0.342821	0.282181			-1.12297	1.67121	NaN	-0.199889	-0.769188	NaN	-1.03993	-0.0119489	0.607341		No
PCRP_PhaseI	18630	SATB1	'3H2	K562	0.945		1238493	82.4225	76.8181	0		0			-0.181812	0.190172			-1.83729	-0.170692	-1.03142	-0.195261	0.405044	0.465312			-2.22181	2.06354	NaN	-0.433411	-1.40058	NaN	-2.0917	0.48265	0.755947		No
PCRP_Phase0	18111	NRF1	'3H1	MCF7	9.825		565256	82.5743	76.3537	1		0			1.43903	0.554376			0.857556	-0.480221	-0.392957	0.230245	-0.0348895	0.15496			0.691178	0.274911	0.794194	-0.450767	-0.3848	0.234687	0.0678759	0.139577	-0.156497		No
PCRP_PhaseIII	28413-28670	NRF1	'3H1	liver	unknown		13963523	78.5484	51.4777	3885		0			0.140332	0.0548463			-0.970276	0.0113748	-0.0866204	-0.821985	-0.151185	0.167403			-0.85474	0.452697	-3.61744	0.0518898	-0.548481	0.42034	-1.67214	-0.461188	0.195467		No
PCRP_Phase0	17356	NRF1	'3H1	K562	17.895		264214	75.343	74.5781	0		0			1.27586	0.0409649			-0.818916	-0.336047	-1.3128	0.286431	0.354384	0.504135			-1.51406	2.06786	NaN	-0.439569	-1.54908	NaN	-1.53793	0.617102	0.678108		No
PCRP_PhaseI	17496	NRF1	'3H1	K562	17.895		812289	80.3421	82.7663	2		0			0.519533	0.0390809			-1.4962	-0.129443	-1.20649	0.010317	0.285906	0.473887			-2.03527	2.01422	NaN	-0.459649	-1.34709	NaN	-1.86275	0.79248	0.599025		No
PCRP_PhaseIII	28419	NRF1	'3H1	liver	unknown		14547948	80.435	40.594	117		0			0.279429	-0.00452675			1.37827	-0.34858	0.23882	-1.05657	-0.819362	-0.183879			1.30974	-0.35312	1.15054	-0.34461	0.362629	-0.313114	0.157909	-0.216105	-0.351112		No
PCRP_PhaseIII	28431-28680	NRF1	'3H1	placenta	unknown		17188914	80.6433	48.7598	8848		0			0.202886	-0.0613093			-0.169769	-0.0133367	-0.0364103	-0.185728	-0.211429	0.0407628			-0.210589	0.130357	-1.02842	-0.0347969	-0.105378	0.311095	-0.471265	0.0935534	-0.108527		No
PCRP_PhaseIII	28437-28686	NRF1	'3H1	Breast	unknown		2134987	52.5979	69.5004	0		0			-0.134592	-0.140953			nan	nan	nan	nan	nan	nan			nan	nan	nan	nan	nan	nan	nan	nan	nan		No
PCRP_Phase0	17370	NRF1	'3H1	HepG2	6.285		685247	62.2363	73.2183	0		0			0.149757	-0.424255			-0.985856	-0.0577637	-0.728803	-0.681478	-0.362585	0.226945			-0.793525	0.35919	-1.19233	-0.112486	-0.247856	NaN	-1.40392	0.418807	-0.106218		No
PCRP_PhaseII	22862-23324	PLXNB1	'3G4	K562	7.055		3151283	80.8696	86.6428	155		0			0.0965169	0.162694			-1.56387	-0.0793819	-0.976105	-0.150867	0.408819	0.402895			-1.95507	1.96656	NaN	-0.380329	-1.29997	NaN	-1.75127	0.606053	0.709611		No
PCRP_PhaseI	18986	ZSCAN23	'3G2	K562	0.225		3429001	57.1351	87.1632	16		0			0.430957	0.369057			-1.59181	-0.188097	-1.0946	-0.0700889	0.248972	0.494686			-2.07661	2.09659	NaN	-0.498544	-1.49654	NaN	-1.48398	0.773834	0.575656		No
PCRP_PhaseI	19095-19604	SLC25A24	'3G2	K562	NaN		5424967	74.7349	61.5142	0		0			-0.581149	-0.151918			-2.03463	-0.0498881	-1.14332	-0.673043	0.0387273	0.503599			-2.59859	2.19295	NaN	-0.400378	-1.46456	NaN	-2.07673	0.781248	0.248422		No
PCRP_PhaseI	19081	JUNB	'3G2	K562	NaN		11630279	76.2429	53.0266	24		0			-0.388892	-0.198442			-1.29376	-0.224705	-0.973056	-0.379922	-0.768399	0.593159			-1.17678	1.57363	NaN	-0.290199	-0.481056	NaN	-0.383524	0.717628	-0.393587		No
PCRP_PhaseI	18369	ZNF202	'3G1	K562	7.555		2655458	40.1289	81.1616	59		0			0.445067	0.312948			-1.46262	-0.131865	-0.942514	0.0204716	0.308926	0.429574			-1.75549	1.99146	NaN	-0.372634	-1.30495	NaN	-1.42047	0.530361	0.654509		No
PCRP_PhaseI	18362	SP140	'3G1	K562	0.805		2731747	56.9716	73.7191	21		0			0.696681	0.312571			-1.13279	-0.120051	-0.82491	-0.0725777	0.296998	0.38705			-1.42473	1.90236	NaN	-0.312051	-1.12788	NaN	-1.28375	0.46687	0.571708		No
PCRP_PhaseI	19126	HMGXB4	'3F4	K562	15.42		15240110	82.3016	33.2235	2766		0			-0.439307	-0.560901			-1.54816	0.316188	-0.384632	-0.050714	0.651769	-0.0384333			-1.92314	1.71677	NaN	-0.169437	-0.788723	NaN	-1.32425	-0.281866	0.790271		No
PCRP_PhaseII	22883-23332	NKX2-5	'3F2	K562	0		12871221	89.0192	51.5777	16		0			-0.0664394	-0.0722908			-1.02907	-0.0322582	-0.563523	-0.250392	0.40133	0.265225			-1.13808	1.45626	NaN	-0.143571	-0.595843	NaN	-0.702521	-0.110539	0.650047		No
PCRP_PhaseII	23772-24097	PRDM7	'3F10	K562	0.005		12226389	83.9971	28.3129	14		0			-0.190235	-0.0485619			-0.798934	-0.365041	-0.365101	0.220948	-0.121363	0.417393			-0.45347	0.360563	NaN	-0.109904	0.10742	NaN	0.067538	-0.956028	0.133242		No
PCRP_PhaseI	17443-22051	DRGX	'3F1	MCF7	0.02		3165897	83.3036	48.1315	0		0			0.412782	0.106752			0.2819	-0.272657	0.0951203	0.196831	0.110152	0.0837892			0.228391	0.161709	0.0139668	-0.283588	-0.0461609	0.0658946	-0.102847	-0.166912	-0.018429		No
PCRP_PhaseII	23575-23929	POU3F2	'3E6	K562	NaN		13596059	78.7642	46.7343	71		0			-0.097533	-0.0306937			-0.89144	-0.0820965	-0.418306	-0.191032	0.0330393	0.307042			-0.732862	1.28787	NaN	-0.0957902	-0.365943	NaN	-0.39417	-0.181451	0.255147		No
PCRP_PhaseI	18994	TSC22D4	'3E10	K562	10.175		2083838	73.763	83.2406	6		0			0.981776	0.47187			-1.23065	-0.150291	-0.977732	-0.0774171	0.290437	0.434529			-1.75288	2.03049	NaN	-0.439638	-1.34604	NaN	-1.5177	0.631266	0.601823		No
PCRP_PhaseIII	26299	EHMT2	'3D9	K562	24.33		18862875	85.4651	23.1041	13		0			0.254959	0.121333			-0.0919988	-0.712118	-0.405544	-0.646934	-1.15286	0.564878			0.488542	-0.902063	NaN	-0.0721884	0.257508	NaN	0.556032	-0.916534	-0.789468		No
PCRP_PhaseI	19088-19599	DDX58	'3D8	K562	NaN		13397569	81.8742	50.2743	2		0			-0.616354	-0.261356			-1.91929	0.0276217	-0.962685	-0.59784	-0.0750117	0.451624			-2.07446	1.99339	NaN	-0.277637	-0.983481	NaN	-1.18348	0.51357	0.14374		No
PCRP_PhaseI	19114	RUNX1	'3D7	K562	NaN		2286957	60.8738	66.4323	1		0			-0.26516	-0.195182			-2.51393	-0.187415	-1.28025	-0.83714	-0.305787	0.630752			-2.60101	2.34254	NaN	-0.777459	-1.73186	NaN	-2.13303	1.19288	-0.145067		No
PCRP_PhaseI	18429	STAT1	'3D6	MCF7	47.375		24428355	72.7621	49.8106	136		0			0.143097	-0.0859669			0.248682	0.0319875	-0.0279568	-0.020017	-0.0380243	-0.0224138			0.223875	-0.0649592	-0.610539	0.046309	0.00674124	-0.176741	-0.057998	-0.226462	0.10613		No
PCRP_PhaseI	17445-22053	NRF1	'3D4	MCF7	9.825		3809698	84.9071	48.3996	1		0			0.666068	0.215393			0.733532	-0.260522	0.174235	0.387796	-0.0309213	0.0539889			0.701405	0.161971	0.131586	-0.259528	-0.0313523	0.198014	0.218001	-0.318009	-0.0732063		No
PCRP_PhaseI	17399	PRDM7	'3D3	MCF7	0.04		17433815	82.3863	39.0177	0		0			0.383574	0.180555			0.481075	0.0316851	0.0146952	0.219518	-0.151408	-0.0307259			0.386036	-0.0655908	0.311514	0.101973	-0.0448847	-0.27723	0.183065	-0.371672	0.0903015		No
PCRP_Phase0	17382	PRDM7	'3D3	MCF7	0.04		17249641	74.1956	59.3334	27		0			0.256112	0.0537083			0.206683	0.00446106	-0.13131	-0.0285829	-0.133799	0.00986397			0.0673166	0.0235273	-0.138995	0.0423087	-0.119518	0.153941	-0.145421	-0.0367258	-0.00768065		No
PCRP_PhaseI	18725	NFE2L2	'3D2	HepG2	106.735		1463058	47.3621	82.6743	24		0			-0.431205	-0.0147395			-0.899665	-0.146684	-0.482553	-0.425361	-0.178002	0.217125			-0.809929	0.295244	-0.931502	-0.136433	-0.171287	NaN	-1.05926	0.268699	-0.0268686		No
PCRP_PhaseI	18286	NFE2L2	'3D2	HepG2	106.735		610565	22.6076	92.7432	30		0			-0.41762	-0.208154			-1.15942	-0.113432	-0.669101	-0.444104	-0.483049	0.261379			-1.39282	0.36936	-0.909956	-0.210586	-0.351113	NaN	-0.865709	0.521478	-0.0686176		No
PCRP_PhaseI	18990	RNF113B	'3D10	K562	0		5136751	68.5496	83.6449	31		0			0.420023	0.330626			-1.35461	-0.191559	-1.02582	-0.0510264	0.214388	0.478486			-1.90151	2.03206	NaN	-0.501861	-1.33563	NaN	-1.18216	0.794599	0.513017		No
PCRP_PhaseI	18427	MED6	'3D10	MCF7	52.43		12265982	57.5626	60.9671	85		0			0.0719851	-0.109124			0.232662	0.0101689	0.527883	0.0534379	0.0725222	-0.0775796			0.244199	-0.096979	0.27583	-0.0561655	0.469748	-0.053671	-0.216023	-0.471039	0.028104		No
PCRP_PhaseIII	26457	ZXDC	'3D1	K562	5.08		18551109	83.43	21.7041	136		0			0.511677	0.220637			0.397357	-0.952799	-0.536526	-0.428349	-1.24492	0.576378			0.795619	-0.946631	NaN	-0.170622	0.237099	NaN	0.658147	-0.878266	-1.1082		No
PCRP_PhaseI	18418	PIKFYVE	'3C9	MCF7	7.46		19666364	73.3724	47.6606	63		0			0.115073	-0.151213			0.398429	-0.0342775	0.101864	-0.043537	-0.0606206	-0.00829222			0.355626	-0.0446301	0.790746	-0.0324946	0.0241925	-0.0573302	0.0167499	-0.165588	0.085639		No
PCRP_PhaseI	18972	PBX1	'3C8	K562	0.155		1991104	77.188	24.6232	5		0			1.02461	0.456938			0.595857	-1.1345	-0.688305	0.6028	-1.50328	0.594386			1.34348	0.123536	NaN	-0.617843	-0.0210884	NaN	1.06806	-0.750614	-1.60599		No
PCRP_PhaseII	24037-24389	CEBPZ	'3C7	K562	26.285		23822926	88.2229	31.1245	17		0			-0.00126131	0.0557494			-0.630905	-0.3346	-0.488465	-0.62792	-0.261176	0.453048			-0.284465	0.259302	NaN	-0.017683	0.0886058	NaN	0.193276	-0.713858	-0.059102		No
PCRP_PhaseIII	26440	CEBPZ	'3C7	K562	26.285		16031319	89.068	29.3137	8		0			-0.603464	-0.138785			-1.32811	-0.727684	-1.23376	-0.736202	-1.14431	0.796306			-0.657218	-0.496339	NaN	-0.0289945	0.294038	NaN	0.787354	-0.492947	-0.572884		No
PCRP_PhaseII	22599-23045	ID4	'3C6	K562	0		14930869	86.318	42.2327	1		0			-0.545473	-0.201654			-1.51105	0.0249418	-0.727148	-0.260956	0.282856	0.329267			-1.72248	1.60302	NaN	-0.108572	-0.651683	NaN	-0.967768	-0.139474	0.613734		No
PCRP_PhaseI	18382	PGBD1	'3C5	K562	4.705		3690525	37.7042	79.6563	78		0			0.791979	0.4208			-0.971765	-0.107255	-0.891515	0.111664	0.286377	0.37884			-1.36435	1.90738	NaN	-0.340174	-1.14404	NaN	-1.18311	0.405517	0.62432		No
PCRP_PhaseI	19168-19554	ZFYVE19	'3C5	K562	NaN		15107730	74.9798	54.4459	694		0			-0.130875	-0.386479			-1.27832	0.0289735	-0.729952	-0.179144	0.404272	0.287883			-1.68276	1.91047	NaN	-0.357954	-1.02471	NaN	-1.42902	0.395059	0.565313		No
PCRP_PhaseIII	26460-28235	TADA2A	'3C4	K562	NaN		23679896	83.2349	26.3044	53		0			0.443294	0.180388			0.115092	-0.895371	-0.279253	-0.607876	-0.908274	0.535817			0.533721	-0.757843	NaN	-0.18705	0.275035	NaN	0.550851	-1.17631	-0.684815		No
PCRP_PhaseI	19157	HDGFRP2	'3C4	K562	10.99		13418201	83.4727	45.7157	2125		0			-0.279197	-0.510403			-1.27546	0.275133	-0.332609	0.136083	0.737326	-0.0783949			-1.56855	1.69259	NaN	-0.309408	-0.752381	NaN	-1.35142	-0.260991	0.846312		No
PCRP_PhaseII	22949-23068	CBFB	'3B9	K562	27.785		2864934	86.2033	71.16	0		0			-0.113173	-0.116432			-1.64928	-0.0494855	-0.976145	-0.295885	0.403075	0.397387			-2.17745	1.97847	NaN	-0.356881	-1.22009	NaN	-1.94864	0.459481	0.705967		No
PCRP_PhaseI	18675	BACH2	'3B8	K562	1.955		2096984	72.2969	89.1591	24		0			-0.393518	0.051986			-2.05985	-0.15624	-1.12385	-0.167392	0.315246	0.496515			-2.42321	2.09833	NaN	-0.47729	-1.46942	NaN	-1.89218	0.691042	0.651401		No
PCRP_PhaseI	17453	BACH2	'3B8	K562	1.955		3823293	81.9731	80.4817	8		0			-0.0417366	0.0429728			-1.53758	-0.241675	-1.05484	-0.305012	0.403165	0.48536			-2.07102	2.00652	NaN	-0.490523	-1.35191	NaN	-1.75673	0.728104	0.694189		No
PCRP_PhaseII	22881-23331	SATB1	'3B6	K562	0.945		28807946	87.8396	25.4338	4		0			-0.218065	-0.155263			-1.0108	-0.318062	-0.73272	-0.408007	-0.184583	0.515853			-0.674091	0.175772	NaN	0.0407157	0.104399	NaN	0.271991	-0.839551	0.105364		No
PCRP_PhaseII	22873	SOX4	'3B5	K562	0.005		19052239	85.6564	21.4519	3		0			0.124396	-0.0414668			-0.576954	-1.01182	-0.80743	-1.23514	-0.813483	0.739369			-0.10453	-0.980177	NaN	-0.0816373	0.329556	NaN	0.353796	-0.621194	-0.479406		No
PCRP_PhaseI	19112	SSBP4	'3B5	K562	NaN		1695333	44.3394	72.6461	2		0			-0.572421	-0.318622			-2.19856	-0.192643	-1.61647	-1.6473	-0.53098	0.684769			-2.4327	2.35378	NaN	-0.627913	-1.94127	NaN	-1.94201	1.27318	-0.310454		No
PCRP_PhaseI	19068	NFIX	'3B4	K562	2.63		2053225	83.5062	75.1195	0		0			1.04703	0.620727			-0.854449	-0.135435	-0.897645	0.125859	0.344843	0.371767			-1.31978	1.93808	NaN	-0.378995	-1.24238	NaN	-1.24944	0.416272	0.6924		No
PCRP_PhaseI	17479	TFCP2	'3B1	K562	18.275		4918377	82.1516	80.6434	46		0			0.739353	0.380225			-0.698971	-0.129766	-0.854091	-0.115527	0.408838	0.339931			-1.23345	1.80498	NaN	-0.337503	-1.08182	NaN	-1.24722	0.418585	0.728612		No
PCRP_PhaseI	18978	LRRFIP1	'3A8	K562	13.75		1727099	53.3692	88.6903	20		0			0.682111	0.499703			-1.43488	-0.14509	-1.11705	-0.242543	0.315331	0.464691			-1.9892	2.07137	NaN	-0.45885	-1.42936	NaN	-1.58076	0.643865	0.632027		No
PCRP_PhaseI	17436-22044	HEY2	'3A7	MCF7	11.505		1499576	42.0007	77.7436	2		0			0.620406	0.26429			0.437497	-0.311206	0.227508	0.365104	-0.0847344	0.0877604			0.525164	0.165799	NaN	-0.307245	0.0631432	0.135689	0.13226	-0.25547	-0.098263		No
PCRP_PhaseI	18442	EIF4A3	'3A2	MCF7	124.705		1842150	79.9402	64.4621	0		0			-0.0260368	-0.143943			-0.324209	-0.474463	-0.244302	-0.423933	-0.630474	0.234499			-0.367126	0.412156	-0.824977	-0.431571	-0.322551	0.0154468	-0.824977	0.073517	-0.267644		No
PCRP_PhaseI	19146-19542	FOXA2	'3A2	K562	NaN		10484919	81.4956	62.9479	22		0			-0.166869	-0.301134			-1.58161	-0.0923823	-0.955055	-0.151541	0.303728	0.425251			-2.11295	2.02274	NaN	-0.437726	-1.3086	NaN	-1.65299	0.702067	0.586147		No
PCRP_PhaseII	22943	DPRX	'3A1	K562	0		23926009	87.3384	20.9415	0		0			-0.504277	-0.0569742			-1.70088	-1.44985	-2.14116	-1.58702	-1.20482	1.00185			-0.707099	-2.1636	NaN	-0.116488	0.490304	NaN	1.0533	-0.639205	-1.14311		No
PCRP_PhaseI	17412	ZNF467	'2H7	MCF7	2.9		25935710	88.027	37.8597	13		0			0.598879	0.204222			0.709988	0.0535558	-0.111874	0.0210079	-0.142558	-0.0395105			0.606886	-0.0853521	0.616352	0.172303	-0.118069	-0.0439175	-0.0903985	-0.204852	0.0358445		No
PCRP_PhaseI	19062	ID3	'2H2	K562	26.845		1051389	81.4873	73.5101	-		0			0.349786	0.154996			NaN	NaN	NaN	NaN	NaN	NaN			nan	nan	NaN	nan	nan	NaN	nan	nan	nan		No
PCRP_PhaseII	23513-23884	EEA1	'2H11	K562	2.97		20229391	83.2478	20.2621	5		0			-0.163976	-0.0684624			-1.06621	-0.514919	-0.814748	-0.531137	-0.335464	0.614572			-0.567575	-0.358575	NaN	-0.00303149	0.230859	NaN	0.452175	-0.729687	-0.103689		No
PCRP_PhaseII	23516-23887	ASCL4	'2G8	K562	0		21924094	83.9332	20.0654	17		0			0.0227107	0.0185785			-0.479973	-0.942388	-0.82623	-0.61854	-0.99592	0.725681			-0.0665749	-1.14901	NaN	-0.0697171	0.328608	NaN	0.664863	-0.682127	-0.574206		No
PCRP_PhaseII	22603	TRIM28	'2G8	K562	NaN		14767615	85.3915	36.2476	17		0			-0.406065	-0.145755			-1.20612	-0.316492	-0.600187	-0.654857	-0.439006	0.533743			-0.76167	0.662244	NaN	-0.160172	0.0346148	NaN	0.355809	-0.345173	-0.0567132		No
PCRP_PhaseII	22186-22780	LHX2	'2G5	K562	0.005		5958198	83.9827	59.3822	6		0			-0.361837	-0.0813509			-1.50916	-0.00314398	-0.778694	-0.2015	0.448613	0.320561			-1.76039	1.76187	NaN	-0.21587	-0.86224	NaN	-1.24281	0.17774	0.638825		No
PCRP_PhaseI	19079-19594	TRIM28	'2G5	K562	NaN		13436442	76.3186	51.2156	7		0			-0.391366	-0.229112			-1.48883	-0.0160237	-0.911034	-0.329673	-0.123744	0.445621			-1.8322	1.97245	NaN	-0.306025	-0.886279	NaN	-1.28169	0.477508	0.05417		No
PCRP_PhaseII	22843	PPP1R13L	'2G4	K562	2.67		20895684	84.7298	22.3195	22		0			0.233492	0.0489013			-0.297288	-1.48869	-1.14022	-1.17105	-1.58907	0.866362			0.150375	-1.76229	NaN	-0.17335	0.399916	NaN	0.937595	-0.595795	-1.22694		No
PCRP_PhaseIII	28439-28688	GABPA	'2G3	Breast	unknown		1638856	69.903	59.5827	9253		0			-0.131207	0.134264			0.293056	0.277258	0.409637	0.236015	0.180201	0.0952858			0.372778	0.127012	0.270986	0.286742	0.307966	0.1397	0.278891	-0.219358	0.266898		No
PCRP_PhaseIII	28433-28682	GABPA	'2G3	placenta	unknown		19569778	87.13	45.4405	20948		0			-0.134061	-0.0791326			-0.925803	0.0167152	-0.451366	-0.446125	-0.124493	0.104817			-0.990743	0.208785	-1.45701	-0.00213614	-0.319742	0.397493	-0.638976	0.210348	-0.0960153		No
PCRP_PhaseII	22206-22796	HMGB1	'2G1	K562	238.37		28276242	86.5494	15.4092	0		0			-0.249758	-0.00482208			-1.45657	-0.949424	-1.30356	-1.30524	-0.864246	0.843331			-0.695316	-1.84775	NaN	0.0652853	0.410914	NaN	0.912517	-0.932322	-0.684194		No
PCRP_PhaseI	18612	GBX1	'2F8	K562	0		9927341	82.4053	71.4114	7		0			-0.197963	0.0440745			-1.60252	-0.0877915	-0.819285	-0.116894	0.284823	0.403203			-1.8823	1.95202	NaN	-0.366014	-1.12374	NaN	-1.2143	0.461623	0.579642		No
PCRP_PhaseI	18393	ZNF239	'2F6	K562	12.11		8585472	61.8414	68.2654	156		0			1.29419	0.510835			0.556685	-0.297753	-0.392798	-0.0138204	0.0606747	0.158111			0.344804	1.37111	NaN	-0.397393	-0.602062	NaN	-0.602258	-0.0479828	0.356604		No
PCRP_PhaseI	18388	ZNF397	'2F6	K562	12.88		1160028	45.154	79.098	5		0			0.731978	0.356837			-1.50922	-0.261518	-1.03557	-0.413743	0.444681	0.482846			-1.66461	2.03572	NaN	-0.515733	-1.36331	NaN	-1.64949	0.611803	0.676001		No
PCRP_PhaseIII	26309-28256	ZNF239	'2F6	K562	12.11		22416427	80.3772	41.4517	287		0			0.670056	0.183057			0.392632	-0.18426	0.138316	0.144118	-0.251786	-0.00633841			0.435776	0.66026	NaN	-0.178892	-0.113491	NaN	-0.247987	-0.789345	0.054898		No
PCRP_PhaseI	18622	DPRX	'2F5	K562	0		3686644	84.5618	80.8653	7		0			-0.576555	-0.00186904			-2.02294	-0.1289	-1.11272	-0.324118	0.28882	0.489608			-2.59055	2.07332	NaN	-0.417861	-1.40151	NaN	-2.07128	0.708905	0.608008		No
PCRP_PhaseII	24031-24386	KLF17	'2F4	K562	0.04		3548921	81.5913	82.8264	20		0			0.706856	0.298822			-0.9539	-0.0382767	-0.64517	-0.0837005	0.36785	0.284168			-1.25029	1.8211	NaN	-0.301204	-1.04105	NaN	-1.52938	0.507654	0.581464		No
PCRP_PhaseII	22595-23042	RNF113B	'2F4	K562	0		483717	72.6124	86.7627	36		0			-0.4978	0.201332			-1.91843	-0.109631	-1.16917	-0.267635	0.31931	0.479467			-2.62048	2.00094	NaN	-0.443839	-1.45101	NaN	-1.85159	0.931312	0.668992		No
PCRP_PhaseI	18317	SMAD9	'2F4	HepG2	4.15		1070154	34.8926	90.292	865		0			-0.147022	0.0847584			-1.01056	-0.149276	-0.710635	-0.53626	-0.420584	0.267955			-1.23174	0.413297	-0.908071	-0.17955	-0.358639	NaN	-1.09624	0.469721	-0.103943		No
PCRP_PhaseII	23568-23927	ZNF165	'2F4	K562	0.67		24325860	85.4998	24.485	20		0			0.0622092	-0.00186904			-0.375206	-0.624595	-0.619318	-0.536982	-0.688047	0.58529			0.0498094	-0.0871659	NaN	-0.0732784	0.206858	NaN	0.369887	-1.03909	-0.401654		No
PCRP_PhaseII	22197-22788	ID1	'2F11	K562	59.34		4446902	79.4547	69.445	10		0			-0.0521411	-0.00301446			-1.57183	-0.0918719	-0.953578	0.046626	0.31275	0.418528			-1.96608	1.96201	NaN	-0.336649	-1.20168	NaN	-1.35457	0.398998	0.68195		No
PCRP_PhaseIII	26449-28232	QKI	'2F10	K562	NaN		30967864	87.4269	18.1079	181		0			0.700574	0.216843			0.708191	-0.822517	0.278356	-0.302226	-1.14459	0.217355			1.12388	-1.57899	NaN	-0.163689	0.221372	NaN	0.31145	-1.49753	-0.889385		No
PCRP_PhaseII	22189	QKI	'2F10	K562	NaN		17552033	85.961	19.6742	34		0			0.76307	0.0532847			0.801169	-1.22445	0.0413806	-1.45062	-1.56877	0.42332			1.23752	-1.72016	NaN	-0.33029	0.238111	NaN	0.308868	-0.998695	-1.18665		No
PCRP_PhaseI	18424	SMARCE1	'2E9	MCF7	60.3		8784174	71.9942	60.2738	17		0			-0.132222	-0.15382			0.107712	-0.12686	0.52658	0.063166	-0.0701357	-0.0040411			0.105828	0.0554724	-0.447503	-0.171485	0.315708	0.11462	-0.00861851	-0.159668	-0.0980854		No
PCRP_PhaseII	22941-23066	HES1	'2E8	K562	4.19		8227018	88.5107	47.6438	0		0			-0.249498	-0.104488			-1.39232	0.0700136	-0.541944	-0.120548	0.372209	0.235144			-1.47725	1.59851	NaN	-0.159853	-0.69578	NaN	-1.13488	0.0237262	0.649819		No
PCRP_Phase0	18092	FOXM1	'2E6	K562	7.59		1159811	74.9433	77.1273	1		0			1.19272	0.508016			-1.22068	-0.0393963	-0.903935	-0.450006	0.283452	0.379866			-1.72108	1.95623	NaN	-0.328585	-1.27223	NaN	-1.67095	0.578754	0.638938		No
PCRP_Phase0	18108	FOXM1	'2E6	MCF7	35.995		741491	82.9751	75.6449	0		0			0.43234	0.426498			0.0329512	-0.44613	-0.502606	0.0897355	-0.124773	0.201156			-0.0455386	0.323348	0.139112	-0.408222	-0.540963	-0.0313529	-0.314606	0.131654	-0.0625038		No
PCRP_PhaseI	19031	KLF16	'2E5	K562	2.635		7144843	81.8682	71.854	15		0			0.357827	0.361944			-0.739128	-0.145019	-0.731717	0.0709338	0.245464	0.35316			-1.24986	1.7587	NaN	-0.403435	-0.919854	NaN	-0.754494	0.562942	0.535769		No
PCRP_PhaseI	17467	STAT3	'2E3	K562	64.78		8147781	80.2918	80.1119	86		0			0.606056	0.382846			-0.398539	-0.209349	-0.726209	0.058804	0.415119	0.311355			-0.90309	1.60518	NaN	-0.368648	-0.868697	NaN	-0.718883	0.583553	0.620198		No
PCRP_PhaseI	18689	STAT3	'2E3	K562	64.78		2332431	86.3248	86.0593	16		0			0.322544	0.263293			-1.6459	-0.140818	-0.906675	0.0544026	0.35129	0.428701			-2.10765	1.96644	NaN	-0.387674	-1.30521	NaN	-1.65348	0.597517	0.739826		No
PCRP_PhaseIII	26441-28230	ZFYVE20	'2E3	K562	10.01		1040598	77.8422	84.5876	1		0			-0.153855	0.018699			-1.87995	0.00131708	-1.02258	-0.411715	0.162451	0.435064			-2.21096	2.0302	NaN	-0.363144	-1.43027	NaN	-1.76258	0.973488	0.414025		No
PCRP_PhaseII	22211-22798	ZFYVE20	'2E3	K562	10.01		26242117	86.7904	19.091	0		0			-0.382874	-0.192557			-1.60519	-0.856356	-1.2999	-1.725	-1.06353	0.844454			-0.826417	-0.564895	NaN	-0.00510448	0.349521	NaN	0.505968	-0.87223	-0.452071		No
PCRP_PhaseI	18432	KHDRBS1	'2E2	MCF7	55.645		25591664	73.4389	47.3856	74		0			-0.0617786	-0.168783			0.146071	0.0155245	-0.0508613	-0.172259	-0.0139657	-0.00649143			0.0638134	-0.0477175	0.559147	0.0442873	0.00342772	0.102734	-0.0322417	-0.193904	0.0770005		No
PCRP_PhaseI	19082-19596	DVL3	'2E12	K562	13.98		9134887	75.1682	57.5648	7		0			-0.401669	-0.193599			-1.99192	-0.0880415	-1.15946	-0.349572	-0.00528442	0.52165			-2.39055	2.17377	NaN	-0.452334	-1.4037	NaN	-1.62048	0.806246	0.21464		No
PCRP_PhaseI	19148-19544	HDAC1	'2E12	K562	NaN		15257180	83.7604	55.644	6067		0			0.186282	-0.194465			-0.588077	-0.0290972	-0.42479	0.0320324	0.312053	0.195041			-1.09229	1.78843	NaN	-0.357083	-0.885014	NaN	-1.14069	0.318617	0.53363		No
PCRP_PhaseI	19108-19616	BRPF1	'2E11	K562	9.03		4092107	83.4386	72.7701	5		0			-0.561162	-0.179995			-2.09948	-0.0677292	-1.15795	-0.34601	0.0845208	0.504383			-2.64886	2.14459	NaN	-0.414183	-1.427	NaN	-1.83417	0.845333	0.306503		No
PCRP_PhaseI	18372	CBX3	'2E1	K562	201.375		1120564	56.255	76.5775	5		0			0.480019	0.312558			-1.75102	-0.212008	-1.00065	-0.456094	0.0545006	0.532661			-2.01184	2.03762	NaN	-0.386113	-1.34726	NaN	-1.75332	0.671877	0.560556		No
PCRP_PhaseII	23555	TFAP2B	'2E1	K562	0		16230743	89.332	29.8491	7		0			-0.165814	-0.118101			-0.814059	-1.16705	-0.975895	-1.14024	-0.84777	0.808275			-0.334992	-0.537264	NaN	-0.162477	0.272596	NaN	0.720202	-0.107157	-0.600528		No
PCRP_PhaseI	18386	COPS3	'2D9	K562	103.79		5337033	50.2804	74.4708	86		0			0.990275	0.398085			-0.529258	0.0415614	-0.663298	0.110408	0.174256	0.234269			-0.608308	1.54486	NaN	0.0783423	-0.871052	NaN	-0.632185	0.115222	0.417593		No
PCRP_PhaseII	23833	PHF19	'2D9	K562	244.985		18157407	81.7599	32.8681	35		0			0.296815	0.10508			-0.0407901	-1.05463	-0.736583	-0.681545	-0.844847	0.678727			0.232204	-0.695076	NaN	-0.281246	0.252383	NaN	0.775802	-0.306191	-0.570704		No
PCRP_PhaseI	18288	ZBED3	'2D9	HepG2	4.765		437641	48.2097	85.4027	4		0			0.128303	0.0148714			-1.07216	-0.122914	-0.738064	-0.445852	-0.389994	0.258718			-1.25721	0.376464	-1.15791	-0.196496	-0.320883	NaN	-1.36335	0.423858	-0.0374806		No
PCRP_PhaseI	18727	ZBED3	'2D9	HepG2	4.765		3660328	71.8193	61.2741	272		0			-0.152487	-0.18163			-0.684993	-0.18748	-0.354769	-0.310719	-0.204716	0.211404			-0.773407	0.232974	-0.594131	-0.200706	-0.216079	NaN	-0.532414	0.145921	0.0774189		No
PCRP_PhaseI	18445	ATAD2	'2D9	MCF7	73.675		1325403	78.0841	67.8516	1		0			-0.216719	-0.305742			-0.115735	-0.531692	-0.479318	-0.175072	-0.188811	0.232489			-0.317575	0.362787	-0.697423	-0.553549	-0.400411	0.354505	-0.434388	0.022907	-0.0671395		No
PCRP_PhaseII	23854	ZNF207	'2D8	K562	183.85		16398297	75.9579	30.1283	0		0			-0.0598156	-0.0248403			-0.880695	-1.0891	-1.15397	-1.52583	-1.04694	0.834078			-0.182166	-1.18776	NaN	-0.120836	0.39103	NaN	0.815394	-0.62379	-0.976666		No
PCRP_PhaseII	23584-23936	CBX5	'2D8	K562	56.365		27674068	87.2063	21.2528	4		0			-0.159761	-0.0901781			-0.638414	-0.61871	-0.570391	-0.49154	-0.6166	0.593467			-0.21444	-0.102912	NaN	-0.117781	0.250637	NaN	0.503746	-1.10634	-0.334608		No
PCRP_PhaseI	19140	NANOGP1	'2D8	K562	0		13012972	83.8287	42.2794	152		0			0.256235	-0.1702			-0.118727	0.0187615	-0.184054	0.20016	0.442483	-0.0185178			-0.420078	1.25841	NaN	-0.507424	-0.459106	NaN	-0.147562	0.0265297	0.673441		No
PCRP_PhaseI	19065	ZSCAN2	'2D7	K562	5.48		762398	78.0603	76.6625	-		0			0.690065	0.31924			NaN	NaN	NaN	NaN	NaN	NaN			nan	nan	NaN	nan	nan	NaN	nan	nan	nan		No
PCRP_PhaseII	22971	MYCL1	'2D5	K562	NaN		17474688	84.5986	19.7697	3		0			0.0665861	-0.0418982			-0.765878	-0.983974	-1.12193	-1.17397	-0.845112	0.790847			-0.12319	-1.41121	NaN	-0.0530557	0.350253	NaN	0.860838	-0.675229	-0.72066		No
PCRP_PhaseI	18385	IGF2BP1	'2D4	K562	18.43		7736159	56.5088	71.1508	116		0			1.156	0.583584			0.0880149	-0.184256	-0.388792	0.233629	0.252421	0.167638			-0.0810645	1.47359	NaN	-0.318644	-0.684193	NaN	-0.493401	-0.0705767	0.526807		No
PCRP_PhaseII	23556	NFIX	'2D3	K562	2.63		22149370	89.8915	21.9053	2		0			-0.29422	-0.0909624			-1.08776	-1.18395	-1.17629	-1.77596	-1.21907	0.872998			-0.405546	-1.44529	NaN	-0.161133	0.414828	NaN	0.900079	-0.366744	-0.959086		No
PCRP_PhaseI	18443	ZNF165	'2D3	MCF7	1.865		4202785	80.2892	63.8813	79		0			-0.389275	-0.175802			0.0147058	-0.270037	0.476466	-0.169639	0.0183151	0.0601158			-0.0514322	0.143711	-0.261355	-0.325778	0.259824	-0.253822	-0.168246	0.0636326	-0.146002		No
PCRP_PhaseI	18988	METTL21A	'2D2	K562	NaN		2575049	63.8662	84.96	13		0			0.660737	0.504071			-1.48435	-0.154037	-1.06168	-0.0576043	0.31025	0.460302			-1.92223	2.03027	NaN	-0.438688	-1.42124	NaN	-1.57746	0.754208	0.617491		No
PCRP_PhaseIII	26288-28248	ZFAT	'2D2	K562	1.085		1854503	75.4924	90.6284	6668		0			1.22056	0.308173			-1.40063	-0.119106	-1.04429	-0.209219	0.29146	0.444475			-1.7413	2.03965	NaN	-0.402391	-1.43561	NaN	-1.99748	0.718577	0.599465		No
PCRP_PhaseI	18364	LHX2	'2D12	K562	0.005		4529849	75.7101	64.049	27		0			1.4342	0.409536			0.499407	-0.184745	-0.594424	-0.779052	0.126098	0.177639			0.357508	1.54196	NaN	-0.331213	-0.878189	NaN	-1.09848	-0.00386842	0.500486		No
PCRP_PhaseI	18995	YBX3	'2D12	K562	30.8		2033937	53.6756	88.1109	64		0			0.523523	0.385306			-1.39079	-0.18813	-1.14537	-0.406019	0.289453	0.490752			-2.09784	2.08268	NaN	-0.477574	-1.47657	NaN	-1.61648	0.773231	0.585842		No
PCRP_PhaseI	18706	SOHLH1	'2D12	K562	0.1		149116	79.184	90.8417	-		0			-0.496514	0.0908178			NaN	NaN	NaN	NaN	NaN	NaN			nan	nan	NaN	nan	nan	NaN	nan	nan	nan		No
PCRP_PhaseI	17484	SOHLH1	'2D12	K562	0.1		1217867	75.0882	84.1333	0		0			0.144539	0.0582411			-1.62573	-0.276988	-1.15699	-0.280917	0.27597	0.537936			-2.20964	2.11889	NaN	-0.53128	-1.50554	NaN	-1.66321	0.763874	0.588402		No
PCRP_PhaseIII	26307-28254	LHX2	'2D12	K562	0.005		11858166	88.4864	52.1572	11		0			0.663901	-0.000830384			-0.55253	-0.079801	-0.725878	-0.0189572	0.192217	0.313546			-0.662415	1.75621	NaN	-0.259742	-0.909663	NaN	-1.254	0.157408	0.512648		No
PCRP_PhaseII	23790-24115	CTBP2	'2D11	K562	0.975		20622008	86.0607	16.5213	0		0			0.168858	0.0853318			-0.372987	-0.697346	-0.475136	-0.372183	-0.56707	0.563883			0.0212025	-1.12643	NaN	0.00458044	0.277842	NaN	0.665249	-0.912485	-0.379619		No
PCRP_PhaseII	22218-22805	ARNT	'2D11	K562	NaN		4385397	84.9193	65.6697	4		0			0.0964283	-0.0402319			-1.64827	-0.0397796	-0.854429	-0.105273	0.349459	0.377928			-1.90653	1.93192	NaN	-0.350044	-1.13539	NaN	-1.41903	0.421372	0.66739		No
PCRP_PhaseI	19133	SCXA	'2D11	K562	NaN		14939475	81.8313	40.3407	1148		0			-0.424335	-0.479731			-1.20567	0.256984	-0.290897	-0.0601649	0.521814	-0.0141313			-1.56631	1.6989	NaN	-0.320967	-0.571173	NaN	-1.00523	-0.36028	0.56637		No
PCRP_PhaseI	18405	ZNF197	'2D1	K562	7.275		6254872	51.2979	74.5935	116		0			0.660784	0.285392			-0.513869	-0.277994	-0.815642	-0.640014	0.151339	0.430494			-0.688416	1.67907	NaN	-0.408042	-0.795421	NaN	-0.799379	0.356229	0.488809		No
PCRP_PhaseII	22980-23086	PRDM4	'2D1	K562	12.12		25805812	87.9067	19.4268	20		0			-0.295383	-0.179972			-1.01574	-0.872066	-0.936752	-1.21043	-0.763968	0.757626			-0.533481	-0.744716	NaN	-0.034811	0.344212	NaN	0.566631	-0.976338	-0.38753		No
PCRP_PhaseI	18674	HDAC8	'2C8	K562	13.475		2691801	68.9062	89.2332	30		0			-0.0765554	0.205863			-1.84802	-0.148978	-1.04812	-0.156906	0.321979	0.473241			-2.3153	2.05795	NaN	-0.421037	-1.40776	NaN	-1.87839	0.655067	0.657991		No
PCRP_PhaseI	17452	HDAC8	'2C8	K562	13.475		2549874	74.3984	82.2689	4		0			0.106197	0.154612			-1.46912	-0.196155	-1.16832	-0.273147	0.350128	0.488957			-2.03399	2.00543	NaN	-0.515906	-1.35325	NaN	-1.47291	0.703972	0.714073		No
PCRP_PhaseI	18975	CTBP2	'2C7	K562	0.975		2053519	64.4679	92.4879	87		0			0.446121	0.635825			-1.38006	-0.161006	-1.05841	0.047476	0.408144	0.437266			-1.86993	1.9996	NaN	-0.419176	-1.40604	NaN	-1.57344	0.629363	0.736848		No
PCRP_PhaseII	23570-23928	MYCN	'2C7	K562	0		12567643	80.3436	55.1001	47		0			0.0165929	-0.0191301			-0.859783	-0.0362025	-0.600501	-0.197975	0.14946	0.307266			-0.894898	1.48115	NaN	-0.171963	-0.527208	NaN	-0.621389	-0.0252937	0.388791		No
PCRP_PhaseII	22607	ZNF446	'2C7	K562	1.22		14349470	84.571	36.1384	1		0			-0.466378	-0.0882171			-1.17976	-0.627761	-1.03342	-0.560481	-0.411985	0.690972			-0.872849	0.411413	NaN	-0.0873478	0.042367	NaN	0.356615	-0.176244	0.0748797		No
PCRP_PhaseI	19067	NFIA	'2C6	K562	6.57		1217398	79.017	75.9615	1		0			1.17016	0.513511			-0.812949	-0.157379	-0.699276	-0.0752718	0.313416	0.35013			-1.15781	1.86041	NaN	-0.442757	-1.15149	NaN	-1.08522	0.486979	0.71839		No
PCRP_PhaseI	18684	CDC5L	'2C6	K562	16.085		5036863	85.4768	88.0867	229		0			0.102217	0.26811			-1.57351	-0.146478	-1.02303	-0.205859	0.372337	0.447957			-2.03095	1.97197	NaN	-0.408282	-1.32351	NaN	-1.74065	0.681782	0.703409		No
PCRP_PhaseI	18676	ZNF792	'2C6	K562	6.61		2320240	79.944	87.3414	25		0			-0.374054	0.217154			-1.94321	-0.195854	-1.18386	-0.277008	0.339184	0.514048			-2.5619	2.10833	NaN	-0.483665	-1.49133	NaN	-1.91181	0.747984	0.624337		No
PCRP_PhaseI	17454	ZNF792	'2C6	K562	6.61		2995028	80.1747	80.3339	5		0			0.0359003	0.216013			-1.50288	-0.20878	-1.16654	-0.0760954	0.389683	0.48491			-2.06701	1.99203	NaN	-0.468252	-1.33073	NaN	-1.47862	0.72729	0.672605		No
PCRP_PhaseII	22220-22807	ZKSCAN2	'2C6	K562	2.1		22461390	86.8698	29.3786	105		0			-0.158915	-0.0915216			-0.648686	-0.131341	-0.403054	-0.025886	0.0188168	0.301371			-0.576174	0.633122	NaN	0.000580971	-0.0392538	NaN	-0.0101729	-0.842656	0.244257		No
PCRP_PhaseI	18929	PRDM1	'2C5	K562	0.115		203933	81.1235	22.1769	3		0			0.54772	0.500353			-0.989106	-1.02758	-2.05088	NaN	-0.865847	0.899241			1.17909	1.69611	NaN	0.0542716	-1.89329	NaN	NaN	NaN	0.87348		No
PCRP_PhaseI	19032	PRDM1	'2C5	K562	0.115		5615819	82.1558	68.8073	5		0			0.532615	0.356967			-0.824529	-0.125253	-0.724279	-0.168379	0.320248	0.342533			-1.07551	1.77699	NaN	-0.318452	-0.988254	NaN	-1.09938	0.359083	0.636916		No
PCRP_PhaseIII	26292	PRDM1	'2C5	K562	0.115		21958003	81.8217	24.5037	39		0			0.292579	0.22093			-0.0717442	-1.04374	-0.728893	-0.603797	-1.56493	0.715088			0.41913	-1.51411	NaN	-0.0987498	0.320604	NaN	0.840812	-0.700095	-1.1065		No
PCRP_PhaseI	18449	ZNF222	'2C5	MCF7	3.74		1326130	86.8072	63.9616	0		0			-0.534893	-0.127254			-0.210563	-0.40971	-0.119919	0.113657	-0.0909357	0.167204			-0.00090485	0.231626	-0.0983532	-0.394429	-0.199891	-0.183929	-0.342279	0.211888	-0.0542811		No
PCRP_PhaseI	19020	DLX3	'2C4	K562	0		1684138	62.8464	89.1706	26		0			-0.0532523	0.281892			-1.85351	-0.201483	-1.15369	-0.171203	0.274671	0.517417			-2.32828	2.13329	NaN	-0.579604	-1.52608	NaN	-1.72006	0.79897	0.597404		No
PCRP_PhaseI	18292	SMARCB1	'2C4	HepG2	84.325		305098	50.1429	84.7568	-		0			-0.380799	0.0363943			NaN	NaN	NaN	NaN	NaN	NaN			nan	nan	nan	nan	nan	NaN	nan	nan	nan		No
PCRP_PhaseI	18731	SMARCB1	'2C4	HepG2	84.325		5422722	71.8539	65.0442	1144		0			-0.156485	-0.0636715			-0.315145	-0.0944861	-0.145894	-0.0153396	-0.000426859	0.0950474			-0.515199	0.164228	-0.199707	-0.108903	0.0152272	NaN	-0.361176	-0.0499152	0.00973041		No
PCRP_PhaseI	18631	RORA	'2C2	K562	0		4358853	80.0055	77.783	4		0			-0.0829016	0.126851			-1.93098	-0.154476	-1.05695	-0.238542	0.312204	0.483255			-2.4718	2.08794	NaN	-0.466548	-1.4364	NaN	-1.90455	0.655488	0.66691		No
PCRP_PhaseII	23859	ZNF800	'2C12	K562	17.41		20717143	86.0597	15.2663	0		0			0.0518135	0.139368			-0.603238	-0.652363	-0.886222	-0.416971	-0.351505	0.628562			-0.310407	-1.43035	NaN	0.00972758	0.311503	NaN	0.718928	-0.812143	-0.234731		No
PCRP_PhaseII	23530-23901	PRDM13	'2C12	K562	0		18879018	85.8229	22.3396	49		0			-0.0161446	-0.0399515			-0.707588	-0.411799	-0.405558	-0.359375	-0.138642	0.450008			-0.329655	0.38227	NaN	-0.0866205	0.0606725	NaN	0.323718	-0.725079	0.0316702		No
PCRP_PhaseI	18411	BRWD1	'2C12	MCF7	31.815		8218025	65.367	62.3619	44		0			-0.13807	-0.191203			0.00105863	-0.0864593	0.222628	0.155908	-0.112073	0.0192487			0.0775854	0.0830577	0.178363	-0.12438	0.0890687	0.230291	0.0352382	-0.106895	-0.0728077		No
PCRP_PhaseI	19130	GTF2E1	'2C12	K562	NaN		18005222	80.225	39.8636	2807		0			-0.259068	-0.505548			-1.25558	0.20652	-0.439917	-0.163097	0.628597	0.0494335			-1.53233	1.61706	NaN	-0.256493	-0.6726	NaN	-1.15844	-0.0465546	0.714862		No
PCRP_PhaseII	22970	PDX1	'2C11	K562	NaN		21448002	82.759	19.0395	77		0			0.77601	0.120431			0.669857	-1.43598	-0.557234	-1.36949	-1.68928	0.644972			1.00866	-2.11322	NaN	-0.256813	0.308597	NaN	0.659541	-0.909639	-1.49528		No
PCRP_PhaseII	22614	SPIC	'2C11	K562	0		18767885	87.0805	42.1254	3		0			-0.255932	-0.0820787			-0.916361	-0.352303	-0.557798	-0.5171	-0.16632	0.4865			-0.604536	0.517179	NaN	-0.101205	0.0188719	NaN	0.101135	-0.213643	0.0396652		No
PCRP_PhaseI	18384	ATF7	'2C10	K562	13.5		4288049	52.7476	73.8064	84		0			1.13768	0.581116			-0.20113	-0.13951	-0.552205	0.0173172	0.194773	0.255883			-0.508226	1.68446	NaN	-0.333894	-0.784058	NaN	-0.862748	0.109442	0.467547		No
PCRP_PhaseI	18614	PPARD	'2C10	K562	8.185		10818557	84.2636	75.7662	8		0			-0.291988	0.00669883			-1.538	-0.0918714	-0.786916	0.0314122	0.283356	0.39267			-1.92634	1.90859	NaN	-0.374055	-1.06944	NaN	-1.27311	0.541414	0.576503		No
PCRP_PhaseII	22617-23057	PPARD	'2C10	K562	8.185		12817487	85.9332	54.0411	7		0			-0.0439813	-0.0130071			-1.09939	-0.01159	-0.607631	-0.0841806	0.305437	0.286243			-1.33835	1.64155	NaN	-0.174308	-0.7327	NaN	-1.16337	0.0602016	0.60459		No
PCRP_PhaseII	24050-24395	ZBTB46	'2C1	K562	0.86		3234031	85.3812	84.1423	28		0			0.777435	0.422465			-0.83139	-0.0480829	-0.711182	0.214481	0.439642	0.270216			-1.23725	1.77401	NaN	-0.328887	-1.05446	NaN	-1.30758	0.468853	0.724036		No
PCRP_PhaseIII	26464	ZNF335	'2C1	K562	4.43		17454098	85.3221	19.5799	112		0			0.314785	0.144369			0.0544834	-1.14672	-0.771996	-0.412504	-1.30768	0.711325			0.527447	-1.58565	NaN	-0.120577	0.334605	NaN	0.772329	-1.10019	-1.01111		No
PCRP_PhaseII	23796-24121	SFMBT1	'2C1	K562	2.31		23546926	87.4416	15.3818	1		0			0.00868978	0.0355794			-0.808177	-1.5077	-1.48234	-1.27681	-1.4318	0.934132			-0.0524011	-1.95229	NaN	-0.149423	0.433896	NaN	1.07292	-0.774908	-1.23436		No
PCRP_PhaseI	18624	FOXN1	'2C1	K562	0		9440712	86.2688	78.7158	4		0			-0.304606	-0.0521268			-1.69056	-0.0731724	-0.932804	-0.283175	0.25309	0.42946			-2.22298	1.93683	NaN	-0.329717	-1.19636	NaN	-1.3103	0.680386	0.571659		No
PCRP_PhaseIII	26286	BATF2	'2B9	K562	5		25121428	85.9833	17.0544	6		0			0.267303	0.16792			-0.351441	-1.33347	-1.1451	-1.10193	-1.85437	0.859285			0.306577	-2.27262	NaN	-0.128584	0.416131	NaN	0.966578	-1.02289	-1.32096		No
PCRP_PhaseI	18681	VENTX	'2B9	K562	0.07		2111754	82.5816	87.4556	74		0			-0.407041	0.0660834			-2.06789	-0.174855	-1.176	-0.318027	0.306605	0.515354			-2.65394	2.10171	NaN	-0.501077	-1.48359	NaN	-2.17247	0.736268	0.674977		No
PCRP_PhaseI	18303	GRHL2	'2B9	HepG2	0		1696470	55.6543	82.5038	869		0			-0.0151694	0.0434344			-0.835626	-0.0850491	-0.421466	-0.301315	-0.202797	0.183896			-0.923147	0.276878	-0.808068	-0.127287	-0.221188	NaN	-1.08649	0.244158	0.00847382		No
PCRP_PhaseII	23862	ZFP92	'2B9	K562	0.685		17072099	86.5328	23.4502	12		0			0.110186	0.00975776			0.333808	-1.26617	-0.820755	-0.712242	-1.22574	0.698165			0.225408	-1.26495	NaN	-0.340862	0.382057	NaN	0.705762	-0.362725	-0.985257		No
PCRP_PhaseI	17459	VENTX	'2B9	K562	0.07		528879	68.8217	82.7947	-		0			-0.361416	-0.0102996			NaN	NaN	NaN	NaN	NaN	NaN			nan	nan	NaN	nan	nan	NaN	nan	nan	nan		No
PCRP_PhaseI	18615	STAT2	'2B9	K562	35.685		12342241	80.8158	76.8471	19		0			-0.211274	-0.0162464			-1.45209	-0.0621301	-0.739341	-0.00961535	0.27908	0.366549			-1.79973	1.85141	NaN	-0.287913	-1.02445	NaN	-1.04822	0.440588	0.591687		No
PCRP_PhaseI	19110	NFKB1	'2B9	K562	NaN		1084688	51.3718	71.2328	4		0			-0.554511	-0.338526			-2.22056	-0.163281	-1.28233	-0.493727	-0.429879	0.622285			-2.26333	2.33678	NaN	-0.831753	-1.63093	NaN	-1.46778	1.19897	-0.334473		No
PCRP_PhaseIII	26443	SYAP1	'2B8	K562	NaN		25241517	89.0546	23.643	2		0			0.0891436	0.153028			-0.670733	-1.39235	-0.876093	-1.33883	-2.07294	0.86854			0.241505	-2.19192	NaN	-0.217903	0.44641	NaN	0.956919	-0.831414	-1.43334		No
PCRP_PhaseII	22634-23061	FOXN1	'2B8	K562	0		8593127	78.8048	52.8197	12		0			0.246107	0.128662			-1.01966	-0.0597014	-0.52163	0.140217	0.288767	0.28138			-1.1541	1.75714	NaN	-0.291433	-0.826556	NaN	-1.06308	0.00745121	0.618486		No
PCRP_PhaseI	18671	HHEX	'2B6	K562	44.98		972064	83.5831	90.1796	35		0			-0.249949	0.153994			-1.91881	-0.122047	-1.04249	0.00914622	0.361175	0.453838			-2.40072	2.02985	NaN	-0.419344	-1.40304	NaN	-1.85576	0.849973	0.579888		No
PCRP_PhaseI	17449	HHEX	'2B6	K562	44.98		7761989	85.3414	77.8913	19		0			-0.0544399	0.0497979			-1.13613	-0.257065	-1.05088	-0.621813	0.233023	0.500565			-1.76045	1.57524	NaN	-0.416236	-0.870859	NaN	-0.487058	1.09518	0.449328		No
PCRP_PhaseIII	26313	MLLT3	'2B6	K562	0.17		18431173	83.5859	33.5222	40		0			0.0317501	0.0473427			-0.351434	-0.610852	-0.591598	-0.737898	-0.830678	0.586887			0.0942543	-0.120176	NaN	0.0342339	0.161681	NaN	0.316356	-0.690294	-0.542564		No
PCRP_PhaseI	18654	NR2E3	'2B6	K562	0		245273	86.6809	82.1921	-		0			-0.364068	0.0394373			NaN	NaN	NaN	NaN	NaN	NaN			nan	nan	NaN	nan	nan	NaN	nan	nan	nan		No
PCRP_PhaseI	18729	NFIL3	'2B5	HepG2	32.61		6986988	80.6497	58.6081	1082		0			0.0116711	0.0333269			0.0241349	-0.0843752	0.127238	-0.355483	0.00521371	0.023318			0.0430308	-0.0960001	0.053813	0.0287256	0.0507146	NaN	-0.0988852	-0.0169473	0.027129		No
PCRP_PhaseII	22839	ZSCAN5A	'2B5	K562	4.565		21998314	86.7936	16.0036	0		0			-0.194632	0.011858			-1.01021	-0.949295	-1.55363	-1.39126	-0.720534	0.83551			-0.756429	-2.22174	NaN	0.0853474	0.411696	NaN	0.839785	-0.718339	-0.645735		No
PCRP_PhaseI	18296	ZXDC	'2B5	HepG2	12.035		1222937	49.5775	84.8501	417		0			-0.3963	-0.00869645			-0.981902	-0.176926	-0.632353	-0.663718	-0.390149	0.269357			-1.42366	0.418862	-1.07085	-0.26824	-0.317416	NaN	-1.07386	0.446188	-0.0544297		No
PCRP_PhaseI	18454	EIF4A2	'2B5	MCF7	498.415		4241117	71.3594	65.4456	299		0			-0.1223	-0.147273			-0.0376059	-0.272178	0.267962	-0.240032	-0.288099	0.100284			-0.0591676	0.253312	-1.4229	-0.312088	0.0495573	-0.205909	-0.242324	0.0329111	-0.199354		No
PCRP_PhaseI	18290	NFIL3	'2B5	HepG2	32.61		315601	48.9367	84.7799	-		0			-0.339831	-0.244648			NaN	NaN	NaN	NaN	NaN	NaN			nan	nan	nan	nan	nan	NaN	nan	nan	nan		No
PCRP_PhaseI	19051	MEIS2	'2B4	K562	11.235		6592022	81.1924	70.3572	6		0			0.386481	0.250181			-0.90847	-0.148859	-0.777594	-0.131008	0.294386	0.375078			-1.22422	1.76422	NaN	-0.344483	-0.95233	NaN	-0.879453	0.483814	0.577473		No
PCRP_PhaseI	18646	FOXL1	'2B4	K562	0		10908767	84.4453	78.4508	10		0			-0.243205	-0.0178194			-1.54605	-0.0936417	-0.901299	-0.203926	0.314963	0.413939			-2.03376	1.95233	NaN	-0.376046	-1.15079	NaN	-1.4219	0.573002	0.584359		No
PCRP_PhaseIII	26293	MEIS2	'2B4	K562	11.235		16618210	86.3809	25.958	19		0			-0.0772318	-0.0636571			-0.757164	-0.913697	-0.808665	-0.984686	-0.868371	0.735856			-0.0288543	-0.395434	NaN	-0.144723	0.288889	NaN	0.608026	-0.831265	-0.610732		No
PCRP_PhaseII	22979-23085	NEDD4L	'2B4	K562	9.57		8409200	84.0821	43.6429	6		0			-0.284806	-0.124683			-1.40261	0.106021	-0.701368	-0.261506	0.321817	0.266054			-1.47316	1.59129	NaN	-0.0690197	-0.65254	NaN	-0.949875	-0.190415	0.567819		No
PCRP_PhaseI	18627	ZNF524	'2B4	K562	2.035		3789568	84.2798	80.82	2		0			-0.676151	-0.168209			-2.06016	-0.133878	-1.1494	-0.256435	0.252006	0.502862			-2.52307	2.12307	NaN	-0.454659	-1.46953	NaN	-1.88423	0.724021	0.553529		No
PCRP_PhaseI	17427-22037	PRDM4	'2B3	MCF7	31.53		13243804	85.1526	43.3499	9		0			0.634877	0.215739			0.873842	0.0387684	0.330667	0.170963	0.105358	-0.102646			0.787615	-0.143024	0.56572	0.0679604	0.206057	0.0106587	0.028063	-0.572397	0.0804217		No
PCRP_PhaseIII	26433	THAP9	'2B3	K562	3.93		28147484	87.8166	19.0912	17		0			0.00947914	0.112145			-0.839122	-1.18745	-0.910013	-1.39608	-1.67994	0.844017			0.0117132	-1.95024	NaN	-0.0795364	0.435247	NaN	0.93177	-0.991496	-1.26825		No
PCRP_PhaseIII	26439-28229	GBX1	'2B3	K562	0		15798896	89.0543	36.0199	18		0			-0.215076	0.00173656			-0.973898	-0.0134379	-0.429628	0.02826	0.0958309	0.26767			-0.953091	1.19436	NaN	-0.025716	-0.294981	NaN	-0.353052	-0.429688	0.321187		No
PCRP_PhaseII	22185	GBX1	'2B3	K562	0		17049696	86.3149	21.552	22		0			-0.110559	-0.0225031			-0.787626	-0.992565	-0.964873	-0.936802	-0.916347	0.77725			-0.305845	-0.909739	NaN	-0.0723394	0.344362	NaN	0.77742	-0.754812	-0.624226		No
PCRP_PhaseI	19018	FOXB2	'2B2	K562	0		2180846	79.9155	84.1022	6		0			0.762022	0.548341			-1.06958	-0.156567	-0.974006	0.000991897	0.289229	0.424039			-1.53978	1.97609	NaN	-0.431687	-1.34304	NaN	-1.51397	0.734927	0.609441		No
PCRP_PhaseI	19099-19608	PRDM16	'2B2	K562	NaN		2464828	72.6225	78.9155	12		0			-0.303068	-0.123894			-1.93919	-0.0545174	-1.16121	-0.23401	0.129302	0.484993			-2.4905	2.11689	NaN	-0.374572	-1.50331	NaN	-1.65733	0.842307	0.413343		No
PCRP_PhaseI	19097-19606	ZBTB3	'2B2	K562	NaN		10928198	82.4118	52.7899	8		0			-0.309971	-0.134808			-1.72876	-0.0189252	-0.922978	-0.355032	0.0312523	0.44044			-1.93519	1.98706	NaN	-0.313531	-1.01674	NaN	-0.9485	0.421118	0.291341		No
PCRP_PhaseII	22868-23327	NR2C1	'2B12	K562	27.56		8233463	88.6977	65.1061	3		0			-0.248796	-0.14928			-1.4333	-0.0306718	-0.817788	-0.184314	0.37677	0.351368			-1.89975	1.80687	NaN	-0.258395	-0.973237	NaN	-1.27967	0.425295	0.631287		No
PCRP_PhaseI	18428	POLE3	'2B11	MCF7	180.07		12848349	64.9342	60.5856	71		0			-0.0573463	-0.172947			0.0964308	-0.025248	0.33127	0.0277561	0.143329	-0.0427324			0.196865	-0.00989023	-0.517678	-0.0747207	0.254508	-0.224742	-0.139166	-0.212386	-0.000274421		No
PCRP_PhaseI	19169-19555	NINJ2	'2B10	K562	NaN		25080009	79.6227	52.9443	11518		0			0.0974436	-0.265307			-0.744272	0.0247247	-0.523795	0.121777	0.389611	0.190975			-1.1235	1.73448	NaN	-0.281085	-0.841153	NaN	-0.865506	0.157845	0.577586		No
PCRP_PhaseI	19150-19545	CBX2	'2B10	K562	NaN		16990160	78.0809	62.7101	2228		0			-0.234176	-0.272421			-1.40492	-0.017625	-0.800991	-0.0382932	0.364933	0.339173			-1.76925	1.93462	NaN	-0.341901	-1.14521	NaN	-1.37515	0.453416	0.623873		No
PCRP_PhaseI	18315	FOXA3	'2A9	HepG2	33.145		954985	34.7034	90.7821	25		0			0.1161	0.19963			-0.790876	-0.188213	-0.551039	-0.747644	-0.287039	0.248505			-0.873415	0.339968	-0.914999	-0.188058	-0.312095	NaN	-1.02368	0.391385	-0.0308411		No
PCRP_PhaseI	18754	FOXA3	'2A9	HepG2	33.145		5870648	48.729	77.7069	1435		0			-0.0864331	0.0198924			-0.540784	-0.143613	-0.333522	-0.125375	-0.391444	0.200241			-0.425819	0.123788	-0.567817	-0.140808	-0.19646	NaN	-0.212368	0.421912	0.00788727		No
PCRP_PhaseII	23557	VENTX	'2A9	K562	0.07		28253285	88.6173	15.1421	0		0			-0.118029	-0.0344814			-1.16526	-1.50474	-1.55718	-2.03279	-1.29756	0.957471			-0.332713	-2.1779	NaN	-0.191141	0.476916	NaN	1.09641	-0.846897	-1.04331		No
PCRP_PhaseI	17416-22027	RXRA	'2A8	MCF7	20.67		9850006	83.667	50.5085	1		0			0.639169	0.236769			0.737756	-0.0829861	0.310394	0.45904	0.202586	-0.0505921			0.660642	-0.0612491	0.33866	-0.113873	0.183814	-0.0781214	0.296115	-0.499896	0.109342		No
PCRP_PhaseI	18316	HNF4A	'2A8	HepG2	58.565		2871464	72.0459	80.6402	2225		0			0.391961	0.176215			-0.525319	-0.0716032	-0.35979	-0.417939	-0.355267	0.171257			-0.555192	0.279009	-0.572849	-0.0756219	-0.213766	NaN	-0.821472	0.227846	-0.0545218		No
PCRP_PhaseI	19010	NEUROG3	'2A6	K562	0		1279849	65.1473	84.9142	10		0			0.547007	0.392407			-1.38213	0.0795773	-0.965344	-0.0278754	0.232876	0.342283			-1.92732	1.93866	NaN	-0.177993	-1.24194	NaN	-1.46378	0.55815	0.529307		No
PCRP_PhaseI	18404	ESRRB	'2A6	K562	14.855		7867576	60.7175	71.3415	144		0			0.524851	0.296233			-0.589565	-0.185797	-0.665863	-0.398313	0.174424	0.364098			-0.672439	1.6219	NaN	-0.296677	-0.756973	NaN	-0.604503	0.348718	0.40251		No
PCRP_PhaseI	18397	CASP8AP2	'2A5	K562	12.17		6655835	64.1118	72.0461	79		0			1.09521	0.481541			-0.180225	-0.126664	-0.565481	0.20547	0.136653	0.255081			-0.274296	1.66204	NaN	-0.301732	-0.860393	NaN	-0.784245	0.154823	0.470773		No
PCRP_PhaseI	19011	ZNF23	'2A5	K562	7.515		2546167	72.282	86.2585	16		0			0.148916	0.298538			-1.687	-0.147139	-1.08789	-0.180827	0.278295	0.479092			-2.11767	2.08691	NaN	-0.480316	-1.41595	NaN	-1.69824	0.722545	0.563032		No
PCRP_PhaseII	22954-23071	SP5	'2A5	K562	0.11		3914480	86.6072	67.817	0		0			0.15639	-0.00911148			-1.48666	-0.0254483	-0.766784	-0.207006	0.405864	0.336772			-1.82761	1.88867	NaN	-0.291295	-1.0972	NaN	-1.5701	0.354983	0.698143		No
PCRP_PhaseI	19113	MYOD1	'2A5	K562	NaN		4899872	68.0949	60.0347	1		0			-0.155769	-0.0558571			-1.25445	-0.274549	-1.03177	-0.555629	-0.287311	0.577312			-1.06477	2.0708	NaN	-0.48433	-1.03501	NaN	-0.44228	0.799378	-0.554091		No
PCRP_PhaseII	23793-24118	ZNF526	'2A4	K562	3.895		3668861	82.1425	65.7918	4		0			0.219077	0.134334			-1.27398	-0.0268508	-0.770762	0.161332	0.41507	0.314522			-1.52929	1.85477	NaN	-0.323932	-1.07321	NaN	-1.45198	0.335876	0.72408		No
PCRP_PhaseI	18616	TFAP2B	'2A4	K562	0		5973769	81.5942	79.0924	7		0			-0.209369	0.088906			-1.62836	-0.137981	-0.892653	-0.174174	0.293614	0.439079			-2.12219	2.01942	NaN	-0.443448	-1.25598	NaN	-1.646	0.568817	0.635557		No
PCRP_PhaseI	18613	ZKSCAN3	'2A4	K562	7.245		8552578	77.7489	76.3068	11		0			-0.326609	-0.0137793			-1.75437	-0.100758	-0.904653	0.0367059	0.323689	0.421384			-2.19115	2.00212	NaN	-0.392657	-1.2316	NaN	-1.28411	0.494612	0.638484		No
PCRP_PhaseII	23536-23907	PRDM2	'2A4	K562	9.7		15979308	85.2854	24.0722	8		0			-0.128578	-0.102704			-0.723049	-0.326497	-0.578815	-0.612549	-0.0953174	0.457851			-0.330055	0.53824	NaN	-0.0318316	0.0227503	NaN	0.160147	-1.11214	0.0963488		No
PCRP_PhaseII	22850-23320	HDAC8	'2A3	K562	13.475		6508203	86.689	71.9676	6		0			-0.0215123	0.0570095			-1.41172	-0.0428242	-0.856476	-0.130028	0.408598	0.355935			-1.78921	1.87742	NaN	-0.293602	-1.10549	NaN	-1.57497	0.428215	0.686899		No
PCRP_PhaseI	18436	HELLS	'2A3	MCF7	57.755		17009885	72.8075	45.9603	21		0			0.273682	-0.0629578			0.754491	0.0105736	0.216707	-0.0268852	0.067063	-0.0693938			0.680218	-0.132305	0.396787	0.0392164	0.175667	-0.089327	9.08184e-05	-0.303792	0.0651379		No
PCRP_PhaseI	18714	ZIC2	'2A2	K562	1.23		262495	75.2479	89.0454	5		0			0.0658413	0.518364			-1.70557	-0.176367	-0.948259	0.0879656	0.307992	0.460049			-2.13556	2.04541	NaN	-0.503993	-1.39706	NaN	-1.67208	0.622274	0.734735		No
PCRP_PhaseI	18649	STAT4	'2A2	K562	0.015		7825287	86.2296	79.4674	21		0			-0.404569	-0.0827897			-1.57515	-0.113264	-0.947522	-0.113407	0.268741	0.438036			-2.08358	1.93288	NaN	-0.387274	-1.19553	NaN	-1.39474	0.753504	0.566298		No
PCRP_PhaseII	23546-23916	ZNF23	'2A2	K562	7.515		28775912	90.5113	26.2761	2		0			-0.611647	-0.239668			-1.49239	-0.162314	-0.612331	-0.289817	-0.168878	0.459091			-1.03773	0.627097	NaN	-0.0105458	0.0175694	NaN	0.116992	-0.716085	0.17941		No
PCRP_PhaseI	18691	NFATC3	'2A12	K562	51.555		616171	85.5962	84.6719	5		0			0.15722	0.42939			-1.91327	-0.152279	-1.05718	-0.178197	0.413777	0.462819			-2.35001	2.0483	NaN	-0.469405	-1.43636	NaN	-2.01616	0.651651	0.756919		No
PCRP_PhaseI	17469	NFATC3	'2A12	K562	51.555		2534542	80.578	81.7038	8		0			0.103086	0.185907			-1.58031	-0.172301	-1.16003	-0.311547	0.358066	0.483287			-2.16111	2.05218	NaN	-0.46132	-1.38962	NaN	-1.81014	0.677868	0.651188		No
PCRP_PhaseII	22610-23054	CEBPB	'2A12	K562	5.745		10642601	80.3947	49.0568	266		0			-0.319243	-0.101193			-1.46808	-0.0565383	-0.772547	0.0199209	0.312393	0.364724			-1.58696	1.80717	NaN	-0.225039	-0.890569	NaN	-0.936788	0.0707715	0.594989		No
PCRP_PhaseI	17482	ZEB2	'2A11	K562	48.61		2373168	76.7972	83.1385	12		0			-0.0669813	0.0780295			-1.69224	-0.199729	-1.22159	-0.282698	0.3531	0.507953			-2.22328	2.04193	NaN	-0.468113	-1.4449	NaN	-1.75183	0.762656	0.677267		No
PCRP_PhaseI	18638	MEF2B	'2A11	K562	0.125		3645143	87.3859	79.1692	0		0			-0.262482	0.0225942			-1.94777	-0.173618	-1.04198	-0.0723602	0.323672	0.484368			-2.3831	2.07511	NaN	-0.492076	-1.43533	NaN	-1.72096	0.715065	0.658035		No
PCRP_PhaseI	18704	ZEB2	'2A11	K562	48.61		175124	79.373	90.6645	-		0			-0.490738	-0.139484			NaN	NaN	NaN	NaN	NaN	NaN			nan	nan	NaN	nan	nan	NaN	nan	nan	nan		No
PCRP_PhaseI	18760	PHF10	'2A10	HepG2	52.275		8461150	72.7257	64.466	1746		0			0.47539	0.223742			0.80851	-0.0982635	0.397614	0.223198	-0.181305	-0.116959			0.536857	-0.120329	1.0557	-0.0858842	0.182023	NaN	0.507137	-0.107938	-0.136435		No
PCRP_PhaseI	18321	PHF10	'2A10	HepG2	52.275		21496266	63.9994	75.2885	9717		0			0.279622	0.111133			0.786173	0.213074	0.104698	-0.201605	0.200251	-0.30205			0.775982	-0.323658	0.678184	0.261505	-0.0445482	NaN	0.80694	-0.186329	-0.103954		No
PCRP_PhaseII	23529-23900	ZNF239	'2A10	K562	12.11		5823047	76.2594	60.3875	32		0			0.248778	0.0637531			-0.873082	-0.0442622	-0.508383	-0.015715	0.363635	0.246374			-0.837663	1.59928	NaN	-0.245917	-0.727625	NaN	-0.878171	0.127964	0.560657		No
PCRP_PhaseI	17425-22035	WHSC1	'2A1	MCF7	48.44		11622896	85.4076	45.7124	1		0			0.522973	0.164757			0.738612	0.0364243	0.417421	0.3435	0.196835	-0.114665			0.659415	-0.15027	0.836746	0.053567	0.268243	0.0537333	0.177783	-0.641958	0.0908455		No
PCRP_PhaseI	18426	SNW1	'2A1	MCF7	52.455		24142931	71.8781	46.1571	28		0			-0.0485513	-0.149047			0.0178835	0.083956	0.0612654	-0.297813	-0.0478603	-0.0378184			0.0267967	-0.0797418	0.802518	0.112794	0.0685208	-0.131054	-0.274297	-0.244175	0.0754991		No
PCRP_PhaseI	18421	PRDM2	'2A1	MCF7	13.1		16360578	70.2848	54.6679	36		0			0.0307154	-0.159041			0.137159	0.0297768	0.118361	-0.108149	0.0727275	-0.034457			0.171552	-0.0332348	0.136069	0.0385388	0.0562263	-0.0838075	-0.0179142	-0.199193	0.0394283		No
PCRP_PhaseII	22601-23047	OVOL2	'2A1	K562	0		7219394	84.0479	61.8968	3		0			-0.520379	-0.253315			-1.91771	-0.0224913	-0.938819	-0.203695	0.344004	0.399896			-2.24348	1.93276	NaN	-0.323619	-1.10135	NaN	-1.43967	0.424842	0.641908		No
PCRP_PhaseII	22942-23067	PPP5C	'1H9	K562	NaN		681612	86.2025	80.1959	1		0			-0.0547654	-0.0190724			-1.75861	-0.0651884	-1.13756	-0.285344	0.289986	0.454479			-2.46353	2.03918	NaN	-0.418426	-1.36896	NaN	-1.90244	0.786673	0.580568		No
PCRP_PhaseI	19120-19620	ZNF804A	'1H8	K562	NaN		12224582	84.7305	49.1891	8		0			0.194476	-0.0396838			-0.941981	-0.0147955	-0.728192	0.0719663	-0.107254	0.364326			-1.00278	1.81159	NaN	-0.118767	-0.834034	NaN	-0.651148	0.290879	0.0170752		No
PCRP_PhaseI	18440	BRD9	'1H8	MCF7	19.94		7611788	51.2828	62.4505	40		0			0.158359	-0.0690186			0.550279	-0.0339034	0.501869	0.152519	0.123727	-0.0757096			0.584835	-0.0954815	0.959874	-0.0596538	0.373638	-0.115054	0.0395631	-0.406639	0.0242052		No
PCRP_PhaseI	18374	MAFG	'1H7	K562	16.75		9213761	77.1623	58.5655	92		0			1.13721	0.393511			0.201995	-0.132341	-0.0921589	0.0826023	-0.0103848	0.0715338			0.0960744	1.23179	NaN	-0.165942	-0.454827	NaN	-0.446561	-0.37307	0.322633		No
PCRP_PhaseII	22976-23083	HEY2	'1H7	K562	0.03		25575283	87.8578	19.8262	4		0			-0.545101	-0.244124			-1.81423	-0.55054	-1.40856	-1.15521	-0.524318	0.756581			-0.99562	-0.273483	NaN	0.137576	0.207773	NaN	0.549346	-0.697395	-0.171034		No
PCRP_PhaseII	23776-24101	PHF17	'1H6	K562	9.535		5980771	88.2105	49.3759	3		0			0.10234	0.125241			-1.13958	-0.0210035	-0.510357	0.264997	0.486495	0.223764			-1.22177	1.51823	NaN	-0.0477963	-0.712079	NaN	-0.884897	-0.101688	0.674967		No
PCRP_PhaseI	19106	PRDM5	'1H5	K562	NaN		15994389	81.7984	47.3597	5		0			-0.180168	-0.167227			-0.547888	-0.246207	-0.894538	-0.524362	-0.573855	0.519722			-0.738063	1.17649	NaN	-0.197998	-0.240274	NaN	0.33942	0.370867	-0.39326		No
PCRP_PhaseII	22867-23326	KCMF1	'1H4	K562	44.645		5743843	88.8206	74.4354	1		0			-0.0404769	-0.0180995			-1.41328	-0.0785229	-0.889372	-0.150095	0.410091	0.378943			-1.70043	1.86639	NaN	-0.332778	-1.10932	NaN	-1.36682	0.465233	0.700819		No
PCRP_PhaseII	23834	ZNF333	'1H4	K562	6.67		14092273	87.9026	36.8537	0		0			-0.163723	-0.075842			-0.597401	-0.767123	-1.01281	-0.847233	-0.675776	0.705983			-0.298285	-0.0232355	NaN	-0.138015	0.159726	NaN	0.577436	0.000516496	-0.487489		No
PCRP_PhaseI	18653	TGIF2LX	'1H4	K562	0		244193	83.8021	82.3675	-		0			-0.562076	-0.389935			NaN	NaN	NaN	NaN	NaN	NaN			nan	nan	NaN	nan	nan	NaN	nan	nan	nan		No
PCRP_PhaseI	18371	ASF1A	'1H3	K562	19.62		838486	57.1555	74.7857	0		0			0.454091	0.326845			-1.73885	-0.151521	-1.08982	-0.0545079	0.254452	0.484932			-2.25457	2.09052	NaN	-0.422292	-1.4394	NaN	-1.66374	0.630283	0.609739		No
PCRP_PhaseII	22604-23049	HHEX	'1H3	K562	44.98		781995	64.043	88.1524	128		0			0.25403	0.0862904			-1.76219	-0.0494847	-1.00692	-0.136657	0.379659	0.409149			-2.22972	1.973	NaN	-0.376391	-1.37507	NaN	-1.5801	0.797622	0.656741		No
PCRP_PhaseI	18642	KLF15	'1H3	K562	1.095		3214181	86.0791	79.6714	0		0			-0.315756	-0.00423017			-1.806	-0.151771	-1.0951	-0.286852	0.297697	0.485934			-2.28617	2.11155	NaN	-0.460495	-1.45065	NaN	-1.78589	0.66135	0.587776		No
PCRP_PhaseII	22947	GTF2B	'1H2	K562	NaN		20444358	83.8774	26.49	31		0			-0.193431	-0.078147			-0.962976	-0.878597	-0.910977	-0.668545	-0.862085	0.753594			-0.360795	-0.857893	NaN	-0.0210829	0.319507	NaN	0.681697	-0.498879	-0.65707		No
PCRP_PhaseI	19104-19613	TDRKH	'1H2	K562	11.745		12168785	82.8957	52.1309	6		0			-0.229127	-0.153049			-1.50913	0.00901709	-0.860284	-0.404933	-0.131421	0.428549			-1.79438	1.98614	NaN	-0.30832	-1.00095	NaN	-1.14019	0.559407	0.13965		No
PCRP_PhaseI	17424-22034	OVOL2	'1H12	MCF7	4.24		6706170	84.8918	50.3863	0		0			0.387357	0.135449			0.541029	-0.083803	0.285624	0.412878	0.144155	-0.027953			0.457085	0.0119097	-1.00077	-0.117749	0.146486	0.125709	0.0387625	-0.454084	0.0498491		No
PCRP_PhaseI	19000	PBX4	'1H1	K562	1.78		6899167	70.6902	87.2382	124		0			0.572831	0.528502			-1.2771	-0.143017	-1.0248	0.0364077	0.310425	0.436013			-1.81798	2.00598	NaN	-0.436465	-1.32456	NaN	-1.43433	0.681745	0.603812		No
PCRP_PhaseI	18991	BMI1	'1H1	K562	41.99		910732	73.1093	84.0361	-		0			0.634966	0.431585			NaN	NaN	NaN	NaN	NaN	NaN			nan	nan	NaN	nan	nan	NaN	nan	nan	nan		No
PCRP_PhaseII	23789-24114	PARP11	'1H1	K562	0.16		17657264	87.1221	18.5871	0		0			-0.0157394	0.0350513			-0.796178	-0.586207	-0.630475	-0.584764	-0.284849	0.579573			-0.167102	-0.613554	NaN	-0.0553322	0.23998	NaN	0.657018	-0.946685	-0.146355		No
PCRP_PhaseI	18623	KLF14	'1H1	K562	0.015		6043717	86.7223	79.4857	3		0			-0.455884	-0.14721			-1.78465	-0.113054	-0.983702	-0.121694	0.322048	0.444782			-2.28628	2.01042	NaN	-0.444886	-1.23232	NaN	-1.57319	0.616158	0.614116		No
PCRP_PhaseII	22964-23078	BMI1	'1G9	K562	41.99		24254351	87.2172	24.1366	35		0			-0.232711	-0.169893			-1.03029	-0.629478	-0.808116	-0.876238	-0.214761	0.634687			-0.757811	-0.0985662	NaN	-0.0752766	0.255097	NaN	0.158606	-0.86496	-0.0440582		No
PCRP_PhaseI	19151	HEYL	'1G9	K562	0.235		21458326	82.1826	35.3572	1436		0			0.00208276	-0.210276			-0.682521	-0.110142	-0.208895	0.00566841	0.447079	0.154796			-0.597879	1.10083	NaN	-0.334494	-0.273667	NaN	0.131214	-0.364308	0.523708		No
PCRP_PhaseI	18287	FOXP4	'1G7	HepG2	8.605		571088	34.0313	89.8338	8		0			-0.461005	0.310768			-1.19402	-0.184827	-0.567726	-0.460075	-0.251129	0.260373			-0.906433	0.360909	-1.33279	-0.255703	-0.404777	NaN	-1.43677	0.552056	-0.0198786		No
PCRP_PhaseII	22631-23059	SMARCE1	'1G7	K562	35.495		15058141	83.4118	53.2493	14		0			0.232996	0.130332			-0.719206	0.00205637	-0.368408	0.0889087	0.312342	0.175162			-0.866286	1.50639	NaN	-0.182428	-0.598316	NaN	-0.824134	-0.082482	0.539403		No
PCRP_PhaseI	18282	TEAD4	'1G7	HepG2	40.87		1791907	44.3819	86.4482	877		0			-0.259739	-0.0697015			-1.01223	-0.152552	-0.584663	-0.646633	-0.445591	0.262227			-1.02327	0.382728	-1.31231	-0.168203	-0.321415	NaN	-1.33048	0.410923	-0.0560412		No
PCRP_PhaseII	22621	IRF3	'1G7	K562	37.375		23579949	85.7717	34.1387	7		0			-0.248173	-0.0827336			-1.08789	-1.30814	-1.30617	-1.01506	-1.38417	0.90587			-0.427032	-0.846233	NaN	-0.112567	0.332184	NaN	0.875902	-0.257411	-0.816546		No
PCRP_PhaseI	18726	FOXP4	'1G7	HepG2	8.605		12337087	75.5112	59.3274	1016		0			-0.201066	-0.123031			0.0147177	-0.00601208	-0.326561	-0.936285	-0.204481	0.0818977			0.129749	0.0126463	-0.198663	-0.068312	0.0557885	NaN	0.519356	-0.0502361	-0.00133741		No
PCRP_PhaseI	18721	TEAD4	'1G7	HepG2	40.87		2159853	64.5228	71.1882	223		0			-0.1675	-0.146715			-0.550136	-0.221505	-0.282892	-0.134726	-0.364084	0.223551			-0.615606	0.300858	-0.595133	-0.238653	-0.174289	NaN	-0.521455	0.325316	-0.0366837		No
PCRP_PhaseI	19078-19593	ZSCAN5A	'1G7	K562	4.565		13210189	77.9302	49.8938	0		0			-0.672081	-0.319963			-1.76747	0.138882	-1.06812	-0.576104	-0.147234	0.415482			-2.03372	1.98765	NaN	-0.305089	-0.92235	NaN	-1.13621	0.533425	0.0481189		No
PCRP_PhaseI	19134-19533	MAT2B	'1G7	K562	NaN		9256974	86.0663	65.3529	8		0			-0.303769	-0.326342			-1.66374	-0.0919234	-1.00372	-0.164946	0.273166	0.442432			-2.20771	2.0274	NaN	-0.431207	-1.32204	NaN	-1.79458	0.722166	0.587861		No
PCRP_PhaseII	23824	E2F8	'1G6	K562	8.165		14801350	88.9274	36.5764	4		0			-0.514984	-0.21719			-1.18198	-0.527209	-1.35564	-1.43377	-0.749766	0.735972			-0.922753	0.108842	NaN	0.0875854	0.13741	NaN	0.737868	-0.180345	-0.533221		No
PCRP_PhaseII	23769-24094	ZNF24	'1G5	K562	32.5		16174268	86.5812	18.5799	180		0			-0.108145	0.121437			-0.940434	-0.552433	-0.656579	-0.0988282	-0.169281	0.565516			-0.328276	-0.182541	NaN	-0.120777	0.18928	NaN	0.630359	-0.93116	0.028161		No
PCRP_PhaseI	18695	TERF2	'1G5	K562	18.32		2481155	78.2348	87.4055	24		0			-0.335952	0.0979912			-1.9119	-0.145248	-1.06055	-0.28025	0.316154	0.479334			-2.4989	2.08934	NaN	-0.453161	-1.43484	NaN	-1.89575	0.676418	0.638531		No
PCRP_PhaseI	17473	TERF2	'1G5	K562	18.32		1165709	80.1126	83.3582	6		0			-0.190285	-0.138812			-1.89944	-0.222835	-1.2289	-0.670104	0.219936	0.553036			-2.5973	2.09963	NaN	-0.467773	-1.5439	NaN	-2.16397	0.848555	0.617456		No
PCRP_PhaseI	19165-19551	FOXO3	'1G5	K562	NaN		19762893	81.6383	50.0546	5992		0			-0.449272	-0.511818			-1.51038	0.0710396	-0.786621	-0.12066	0.379559	0.295679			-1.8906	1.91265	NaN	-0.283858	-1.10378	NaN	-1.41532	0.454899	0.588245		No
PCRP_PhaseII	23792-24117	ZHX3	'1G3	K562	3.275		24214559	86.3877	15.4383	13		0			0.0754523	0.124513			-0.944559	-1.66893	-1.402	-1.63927	-1.57132	0.959943			-0.0937058	-1.83454	NaN	-0.242071	0.458258	NaN	0.955769	-0.69941	-1.13456		No
PCRP_PhaseII	23852	PHF21B	'1G3	K562	0		21688493	79.9376	21.5914	10		0			0.0189396	0.00448963			-0.953668	-1.27914	-1.19121	-1.54876	-1.35716	0.885769			-0.219288	-1.86576	NaN	-0.123821	0.418046	NaN	0.993874	-0.569073	-1.01033		No
PCRP_PhaseI	18693	SNAI3	'1G2	K562	1.225		409264	82.4733	85.5287	2		0			0.0104996	0.202068			-1.68467	-0.182942	-1.10512	-0.227209	0.457145	0.465482			-2.35728	2.0803	NaN	-0.506801	-1.44009	NaN	-1.94622	0.628738	0.728577		No
PCRP_PhaseII	23808-24133	ZNF217	'1G2	K562	7.47		18864022	88.6407	16.1117	0		0			0.253633	0.13726			-0.240965	-0.672562	-0.539087	-0.111165	-0.380741	0.533654			0.0273609	-0.748479	NaN	-0.0657232	0.242262	NaN	0.498414	-0.775942	-0.222854		No
PCRP_PhaseI	17471	SNAI3	'1G2	K562	1.225		7659980	80.978	81.1623	26		0			-0.00490562	0.129536			-1.30602	-0.198986	-0.942483	-0.268488	0.373455	0.44281			-1.732	1.77323	NaN	-0.412036	-1.07124	NaN	-0.868971	0.85171	0.608379		No
PCRP_PhaseI	18971	SMAD4	'1G12	K562	38.35		294221	76.6748	26.9186	3		0			0.572959	0.336816			NaN	-0.156866	-1.5952	NaN	0.589832	0.577312			0.428321	1.07463	NaN	-0.374572	-1.09975	NaN	-0.0105936	0.656156	0.930063		No
PCRP_PhaseI	19074	SMAD4	'1G12	K562	38.35		6635007	77.7785	75.6599	17		0			0.427986	0.201669			-0.843477	-0.128216	-0.821223	-0.0270177	0.223544	0.378716			-1.29424	1.87178	NaN	-0.336324	-1.09223	NaN	-0.968972	0.55901	0.501014		No
PCRP_PhaseI	18412	MORF4L1	'1G12	MCF7	295.285		17030912	75.6739	53.9437	42		0			-0.071825	-0.150719			0.134022	0.0303609	0.085634	0.0595298	-0.0575343	-0.0261617			0.120701	-0.0532607	0.446981	0.026449	0.0500807	0.069225	0.0212176	-0.0575623	0.0333385		No
PCRP_PhaseII	22210-22797	SP140	'1G12	K562	0.805		29880633	87.3747	19.8311	0		0			-0.484749	-0.247183			-1.58547	-0.517751	-1.01719	-0.87809	-0.669657	0.703888			-0.977467	-0.0364515	NaN	0.0322547	0.241932	NaN	0.36754	-0.733452	-0.2669		No
PCRP_PhaseI	19037	PRRX2	'1G11	K562	0.01		7928699	83.4097	68.1197	4		0			0.0216056	0.0939973			-0.968321	-0.110956	-0.739885	0.0386221	0.360978	0.339414			-1.30671	1.65377	NaN	-0.268302	-0.875051	NaN	-0.775999	0.534607	0.585712		No
PCRP_PhaseIII	26294-28251	PRRX2	'1G11	K562	0.01		7093990	84.624	68.289	5		0			-0.189138	-0.00499766			-1.63009	-0.0927563	-0.950163	-0.215128	0.245517	0.438112			-2.04691	2.01836	NaN	-0.362591	-1.26171	NaN	-1.76576	0.562033	0.575351		No
PCRP_PhaseII	22190-22782	SNAPC4	'1G11	K562	1.91		6521373	85.9922	58.1027	6		0			0.0580221	-0.0426022			-1.04263	-0.00721095	-0.575564	-0.288784	0.401933	0.256854			-1.37382	1.66933	NaN	-0.166849	-0.791479	NaN	-1.34537	-0.0237881	0.694827		No
PCRP_PhaseI	18389	ZBTB37	'1G10	K562	4.64		1177283	38.0738	81.8915	29		0			0.678609	0.420855			-1.10574	-0.261573	-0.851604	-0.0690478	0.200742	0.464432			-1.25726	1.97324	NaN	-0.439959	-1.22606	NaN	-1.36455	0.566307	0.546359		No
PCRP_PhaseI	18672	ZKSCAN2	'1G10	K562	2.1		7626662	87.2996	85.5219	159		0			0.312662	0.299252			-1.34088	-0.131782	-0.853882	-0.155278	0.351367	0.403263			-1.80634	1.92328	NaN	-0.395957	-1.23217	NaN	-1.4837	0.666768	0.669204		No
PCRP_PhaseI	19047	ZNF574	'1G10	K562	6.24		3863694	79.358	71.259	3		0			0.388425	0.264317			-1.32552	-0.1123	-0.957347	-0.112536	0.301908	0.419573			-1.74157	1.97215	NaN	-0.385107	-1.23288	NaN	-1.62031	0.554396	0.625861		No
PCRP_PhaseI	17442-22050	HMGN1	'1G10	MCF7	623.325		2474713	88.6341	49.4348	0		0			0.235821	0.0941525			0.315678	-0.206976	0.246992	0.0318422	0.0780943	0.0497322			0.396077	0.124789	-2.12127	-0.178163	0.0112428	-0.0693467	0.0450839	-0.152235	-0.0613638		No
PCRP_PhaseIII	26291-28250	ZNF574	'1G10	K562	6.24		26174217	85.3825	27.7535	28		0			-0.221129	-0.0930356			-0.763057	-0.223527	-0.398333	-0.234983	-0.291171	0.39827			-0.309719	0.482003	NaN	0.0393909	0.0302424	NaN	0.0918575	-1.03841	-0.00199804		No
PCRP_PhaseI	18641	BCL11A	'1G10	K562	0		1232863	89.25	78.8861	0		0			-0.416435	-0.123193			-1.97794	-0.123705	-1.15024	-0.283938	0.196689	0.504953			-2.66277	2.14484	NaN	-0.42346	-1.49238	NaN	-1.89224	0.66966	0.544353		No
PCRP_PhaseI	18984	NEUROD2	'1G1	K562	NaN		2464555	67.4495	89.8118	41		0			0.608563	0.450948			-1.40207	-0.174069	-1.12206	-0.0597563	0.360496	0.464191			-1.97961	2.04205	NaN	-0.466865	-1.44762	NaN	-1.54977	0.710145	0.676537		No
PCRP_PhaseII	23826	FOSL1	'1G1	K562	4.44		16475286	87.446	35.9538	16		0			-0.164727	-0.0945469			-0.784141	-0.748961	-1.00941	-0.851198	-0.640418	0.713391			-0.275649	-0.144058	NaN	-0.0579806	0.134841	NaN	0.566762	-0.111317	-0.294268		No
PCRP_PhaseI	18448	PAX9	'1G1	MCF7	5		2182096	81.1375	66.0459	0		0			-0.143272	-0.160653			-0.394675	-0.411667	-0.292763	-0.161184	-0.452523	0.211335			-0.413923	0.39707	-1.17228	-0.351972	-0.388956	-0.0150014	-0.709939	0.0927928	-0.268808		No
PCRP_PhaseI	17411	GRHL1	'1F9	MCF7	16.67		23218099	85.8793	34.2657	22		0			0.551764	0.176667			0.443498	0.106569	-0.00943085	-0.160851	-0.17122	-0.0506308			0.298152	-0.0891462	0.774569	0.212583	-0.0507241	-0.106389	-0.211756	-0.475658	0.0821212		No
PCRP_PhaseII	23773-24098	ZNF846	'1F9	K562	4.45		21841865	87.9898	15.8575	13		0			-0.402921	-0.1665			-1.22581	-0.923835	-1.11889	-1.25281	-1.21896	0.826793			-0.698953	-0.588273	NaN	-0.0325265	0.362563	NaN	0.50808	-0.796788	-0.591398		No
PCRP_PhaseI	17430-22038	FOXI1	'1F8	MCF7	0.66		11915534	85.769	44.5214	0		0			0.316585	0.136161			0.297901	0.055386	0.355189	0.29154	0.0434196	-0.0778285			0.361402	-0.158763	0.433879	0.0781151	0.236314	0.0263752	0.14714	-0.646962	0.138745		No
PCRP_PhaseI	18453	EEA1	'1F8	MCF7	6.55		4931852	63.4492	69.1809	44		0			-0.1544	-0.171352			0.0181608	-0.212877	0.364127	-0.580141	-0.22047	0.0727883			0.202043	0.216312	-0.0551853	-0.325865	0.145396	-0.347212	-0.459576	0.0501245	-0.223341		No
PCRP_PhaseI	18285	CEBPE	'1F8	HepG2	0.055		1092911	32.8279	89.6846	265		0			-0.0837075	-0.203805			-0.783279	-0.217782	-0.723704	-0.807226	-0.451622	0.289069			-1.12622	0.333218	-0.828094	-0.198795	-0.286812	NaN	-1.30272	0.449616	-0.0380705		No
PCRP_PhaseI	18724	CEBPE	'1F8	HepG2	0.055		5098371	58.7191	71.6229	254		0			-0.284612	-0.204373			-0.599465	-0.0813386	-0.231507	-0.580841	-0.276898	0.1593			-0.643541	0.174113	-0.419412	-0.114505	-0.00955618	NaN	0.0355725	0.188446	-0.047		No
PCRP_PhaseI	19170-19556	FOXR1	'1F8	K562	0		15133809	87.4275	55.2458	137		0			-0.226277	-0.338598			-1.49334	-0.0270056	-0.910205	-0.129486	0.299254	0.383208			-1.98752	1.98494	NaN	-0.351488	-1.21402	NaN	-1.4175	0.567613	0.557727		No
PCRP_PhaseI	17403	TP53	'1F7	MCF7	80.895		18462370	84.2375	41.4163	6		0			0.469246	0.177134			0.805211	0.0359356	-0.00315599	0.113606	-0.102593	-0.0505421			0.701482	-0.103122	0.638561	0.076195	-0.0215415	-0.214354	0.146708	-0.178976	0.0668986		No
PCRP_PhaseI	18632	OTX2	'1F7	K562	0.005		4122404	76.2433	77.8702	4		0			-0.142259	0.123351			-1.89862	-0.158936	-1.09692	-0.182001	0.3128	0.488494			-2.46676	2.0955	NaN	-0.464356	-1.4473	NaN	-1.82356	0.650966	0.655855		No
PCRP_PhaseI	18298	ZBTB22	'1F7	HepG2	7.53		1231594	39.962	88.3111	221		0			-0.383786	0.0754504			-0.908086	-0.1651	-0.521259	-0.12621	-0.473658	0.254387			-0.583391	0.357526	-1.20726	-0.207932	-0.191285	NaN	-0.373763	0.529466	-0.153915		No
PCRP_PhaseI	18737	ZBTB22	'1F7	HepG2	7.53		4075294	58.1147	74.5531	290		0			-0.19283	-0.0491322			-0.488689	-0.183845	-0.697788	-0.27742	-0.449916	0.253353			-0.76596	0.170682	-0.655289	-0.0590421	-0.182391	NaN	-1.00438	0.385381	-0.0198425		No
PCRP_PhaseI	19111	PPP5C	'1F7	K562	NaN		2044445	52.7129	67.7321	0		0			-0.31898	-0.264525			-2.30259	-0.209043	-1.21056	-0.350792	-0.161413	0.603675			-2.13921	2.30803	NaN	-0.721506	-1.68531	NaN	-1.93176	1.1273	-0.0857441		No
PCRP_PhaseII	22606-23051	E2F6	'1F6	K562	17.01		12099702	82.0294	45.936	3		0			-0.0209355	-0.036066			-1.13674	0.00634043	-0.579288	0.0168276	0.324461	0.267073			-1.0442	1.59379	NaN	-0.138773	-0.67918	NaN	-0.88194	-0.317463	0.630183		No
PCRP_PhaseI	18425	SIRT1	'1F6	MCF7	14.17		11817570	63.9925	62.5423	83		0			-0.0765442	-0.0947557			0.203013	0.00716744	0.569774	0.0987141	0.0832941	-0.086376			0.247825	-0.0786487	-0.276795	-0.0689804	0.452254	0.0161409	0.0515308	-0.342597	-0.0286473		No
PCRP_PhaseI	19083-19597	SOX8	'1F4	K562	NaN		15367073	76.2758	49.6742	24		0			-0.445159	-0.240408			-1.51091	0.0841791	-0.879558	-0.481249	-0.0481674	0.385047			-1.71425	1.94556	NaN	-0.254716	-0.884623	NaN	-1.07843	0.388719	0.0984222		No
PCRP_PhaseII	22205-22795	TADA3	'1F3	K562	NaN		6526345	79.9391	57.1574	4		0			0.123901	-0.0448043			-1.2657	-0.0099603	-0.686336	-0.0493881	0.406414	0.294629			-1.34297	1.72334	NaN	-0.184177	-0.909448	NaN	-1.10381	0.071277	0.713894		No
PCRP_PhaseI	18690	HDGF	'1F2	K562	163.33		8177000	90.397	86.6012	205		0			0.144209	0.295832			-1.19251	0.166227	-0.523933	-0.391153	-0.124228	0.252857			-1.59755	1.67915	NaN	-0.0958268	-0.938646	NaN	-1.08035	0.915526	0.199111		No
PCRP_PhaseI	17474	GTF2A1	'1F2	K562	14.01		1241061	76.6687	84.7062	1		0			0.705154	0.180966			-1.49608	-0.154397	-1.04504	-0.116505	0.333916	0.455684			-1.95587	2.01416	NaN	-0.379041	-1.39805	NaN	-1.78906	0.652289	0.671314		No
PCRP_PhaseI	18375	ZSCAN26	'1F12	K562	NaN		2689329	71.2679	66.5129	1		0			0.730947	0.429501			-0.992736	-0.151873	-0.867533	0.00410685	0.268026	0.401659			-1.36074	1.98541	NaN	-0.392909	-1.21434	NaN	-1.41436	0.425172	0.58047		No
PCRP_PhaseI	19155-19548	VDR	'1F11	K562	NaN		12107055	79.6513	59.4409	170		0			-0.256855	-0.340411			-1.65894	-0.0364606	-0.881386	-0.176887	0.301999	0.391807			-1.95869	1.99614	NaN	-0.396908	-1.21555	NaN	-1.43674	0.539619	0.590406		No
PCRP_PhaseI	19006	ZNF192	'1F10	K562	19.415		7967498	68.9781	81.9508	42		0			0.641432	0.468739			-1.06647	-0.128904	-0.896132	0.0393738	0.246351	0.405237			-1.51206	1.952	NaN	-0.393283	-1.20838	NaN	-1.17527	0.62084	0.534526		No
PCRP_PhaseI	18657	THRA	'1F10	K562	5.39		137025	79.3989	83.4209	-		0			-0.239406	0.357066			NaN	NaN	NaN	NaN	NaN	NaN			nan	nan	NaN	nan	nan	NaN	nan	nan	nan		No
PCRP_PhaseI	18985	SRF	'1F1	K562	NaN		1966144	58.3816	87.1463	8		0			0.400384	0.391787			-1.48144	-0.189031	-1.11636	-0.021888	0.256427	0.490416			-1.84568	2.08221	NaN	-0.499191	-1.45259	NaN	-1.46391	0.711563	0.58474		No
PCRP_PhaseI	17485	ELF2	'1F1	K562	31.605		1585863	77.2279	83.3679	11		0			0.569923	0.202868			-1.56686	-0.178019	-1.27499	-0.14719	0.483698	0.474417			-2.16637	2.02947	NaN	-0.386119	-1.48937	NaN	-1.63277	0.640362	0.751378		No
PCRP_PhaseI	18707	ELF2	'1F1	K562	31.605		553880	84.2892	87.7874	11		0			0.0486674	0.108708			-1.7997	-0.113511	-0.924052	-0.321002	0.383543	0.428611			-2.12648	1.95252	NaN	-0.390463	-1.27003	NaN	-2.00834	0.740561	0.658294		No
PCRP_PhaseI	18645	NR1D1	'1F1	K562	0.205		3621544	81.4974	78.8398	19		0			-0.302582	0.0922309			-1.84078	-0.146036	-1.06156	-0.0855135	0.279502	0.479451			-2.36633	2.07719	NaN	-0.400048	-1.41232	NaN	-1.90376	0.613042	0.633227		No
PCRP_PhaseII	22880-23330	ETS1	'1F1	K562	0.045		18348273	88.5962	41.125	6		0			-0.174136	-0.129888			-1.15716	0.0107921	-0.597389	-0.0677532	0.331025	0.271307			-1.16218	1.36432	NaN	-0.0943586	-0.468217	NaN	-0.47524	-0.325378	0.568546		No
PCRP_PhaseI	19102-19611	OLIG2	'1E9	K562	NaN		8971704	82.4044	54.0918	6		0			-0.0306396	-0.0252088			-1.19925	-0.0564662	-0.645788	-0.0647331	-0.0877784	0.387125			-1.57298	2.01637	NaN	-0.400807	-1.05163	NaN	-1.13816	0.631151	0.129441		No
PCRP_PhaseII	22194-22786	KLF16	'1E9	K562	2.635		18890366	86.2947	24.8109	136		0			-0.432465	-0.122635			-0.823392	-0.128632	-0.624715	-0.0628259	0.12703	0.354179			-1.11871	0.752087	NaN	0.0136617	-0.0869201	NaN	0.0224195	-0.872592	0.431623		No
PCRP_PhaseI	18751	ARID3A	'1E9	HepG2	54.485		2914014	68.6087	71.4278	622		0			-0.327046	-0.126752			-0.80657	-0.133041	-0.383375	-0.823925	-0.282061	0.211785			-0.867387	0.307084	-0.957073	-0.1922	-0.154407	NaN	-1.2987	0.341164	-0.0296709		No
PCRP_PhaseI	18419	ZBTB24	'1E9	MCF7	5.42		9036502	63.4245	60.7797	39		0			-0.0500783	-0.16078			0.230569	-0.0952164	0.563904	0.0365308	0.119689	-0.0389967			0.292241	0.0594986	-0.0551853	-0.203048	0.325186	-0.160126	0.0379241	-0.3025	-0.056796		No
PCRP_PhaseI	18312	ARID3A	'1E9	HepG2	54.485		704169	39.9196	89.0988	11		0			-0.199702	-0.212486			-0.989896	-0.175992	-0.722116	-0.800322	-0.250755	0.263995			-1.27435	0.380418	-1.2076	-0.1566	-0.421962	NaN	-1.14983	0.561349	-0.0855605		No
PCRP_PhaseI	18381	SETD6	'1E8	K562	16.205		4991589	47.7816	76.2252	103		0			0.770932	0.385296			-0.562241	-0.169638	-0.739103	-0.0606814	0.256841	0.348466			-0.809232	1.7326	NaN	-0.368671	-0.9352	NaN	-0.677398	0.350731	0.588855		No
PCRP_PhaseI	18708	NCOA1	'1E8	K562	14.68		497593	81.6826	88.1521	25		0			-0.438892	0.0481104			-1.96692	-0.0932956	-0.951127	-0.0553227	0.333702	0.435069			-2.30782	1.99711	NaN	-0.427497	-1.30696	NaN	-1.70609	0.667249	0.685644		No
PCRP_PhaseII	23819-24486	TRDMT1	'1E8	K562	5.925		2675543	87.4829	74.7019	-		0			-0.0664317	0.0249478			NaN	NaN	NaN	NaN	NaN	NaN			nan	nan	NaN	nan	nan	NaN	nan	nan	nan		No
PCRP_PhaseII	22181-22779	ZKSCAN3	'1E8	K562	7.245		6860819	84.0844	55.1813	31		0			-0.131274	-0.0618889			-1.27633	0.0184598	-0.607222	0.0890251	0.416223	0.257113			-1.47355	1.72206	NaN	-0.175381	-0.871506	NaN	-1.18072	0.0488718	0.696745		No
PCRP_PhaseI	18968	RARB	'1E7	K562	0.385		282457	82.5242	20.9117	3		0			0.67293	0.164307			0.136425	-0.0275834	-0.603416	NaN	-0.740316	0.314278			0.619005	0.872993	NaN	-0.0907787	-0.131454	NaN	NaN	0.261877	-1.27157		No
PCRP_PhaseI	18709	MAX	'1E7	K562	32.925		763686	81.7144	88.9587	79		0			-0.0080021	0.121314			-1.76393	-0.135101	-1.08415	-0.221889	0.441914	0.448992			-2.25668	1.97399	NaN	-0.419635	-1.3796	NaN	-1.58689	0.742215	0.73815		No
PCRP_PhaseI	17487	MAX	'1E7	K562	32.925		1650194	73.6593	83.4658	3		0			0.0840237	0.0959633			-1.92001	-0.186051	-1.23679	-0.255655	0.365584	0.511416			-2.39943	2.06616	NaN	-0.523203	-1.48604	NaN	-2.11486	0.711616	0.769559		No
PCRP_PhaseIII	26295-28252	DDX43	'1E7	K562	0.025		15485691	82.7259	49.027	75		0			-0.181803	-0.0174898			-1.12189	0.0693493	-0.530152	0.208307	0.113013	0.253461			-1.3252	1.6717	NaN	-0.147479	-0.662702	NaN	-0.672623	-0.00587278	0.366411		No
PCRP_PhaseII	22215-22802	ZNF639	'1E7	K562	20.51		21896088	84.2878	25.7066	21		0			0.0823107	-0.107632			-0.500439	-0.537596	-0.182782	-0.639346	-0.613512	0.469244			-0.201882	-0.0813615	NaN	-0.102535	0.261587	NaN	0.152274	-1.18098	-0.285991		No
PCRP_PhaseIII	26159-28314	MAX	'1E7	K562	32.925		2974844	51.4336	84.0649	45		0			-0.0903462	-0.110437			-1.84736	-0.0794193	-1.09844	-0.243521	0.228882	0.468179			-2.30203	2.06007	NaN	-0.393442	-1.4148	NaN	-1.8842	0.702419	0.601103		No
PCRP_PhaseI	18947	GLI1	'1E6	K562	0.465		1327978	81.3924	21.1779	3		0			1.14092	0.484964			1.05154	-1.15687	-0.162236	-1.04106	-1.7321	0.402226			1.38768	-0.925373	NaN	-1.05907	0.0878816	NaN	0.796761	-0.00597418	-0.78043		No
PCRP_PhaseI	18950	CXXC1	'1E5	K562	25.995		216885	77.4749	25.6376	3		0			0.571228	0.272944			0.480379	-0.143061	-2.16635	NaN	NaN	0.613838			0.857164	1.01804	NaN	0.0542716	-0.893294	NaN	0.41825	0.0849995	0.136514		No
PCRP_PhaseI	19058	ZNF583	'1E5	K562	1.35		5478456	80.8721	71.981	17		0			0.378077	0.266156			-0.811983	-0.106388	-0.821285	0.0684579	0.3859	0.334111			-1.33222	1.75361	NaN	-0.339667	-0.941589	NaN	-0.873499	0.554411	0.556044		No
PCRP_PhaseI	18955	ZNF583	'1E5	K562	1.35		226417	81.1289	22.4987	4		0			0.610325	0.25979			NaN	-0.834938	-0.273268	NaN	0.91176	0.506923			1.48721	0.00423722	NaN	-0.959534	-0.585172	NaN	NaN	-0.606878	1.1816		No
PCRP_PhaseI	17435-22043	TERF1	'1E5	MCF7	18.325		2174979	54.2423	66.3818	83		0			0.513398	0.182088			0.420316	-0.33718	0.0313888	0.331015	-0.0922759	0.110235			0.359516	0.173245	-0.68835	-0.299534	-0.0819018	-0.0809038	0.0582013	-0.212582	-0.0156409		No
PCRP_PhaseI	19053	CXXC1	'1E5	K562	25.995		5577944	78.2129	69.9204	18		0			0.153504	0.133158			-0.947942	-0.0571133	-0.784712	-0.189497	0.260988	0.34475			-1.21395	1.71496	NaN	-0.251308	-0.927176	NaN	-1.02151	0.404855	0.612143		No
PCRP_PhaseII	23518-23889	ZNF75A	'1E5	K562	10.585		4560406	72.3094	65.4283	5		0			0.226365	0.111505			-0.970109	-0.0758338	-0.689959	0.0903501	0.377937	0.30789			-1.11465	1.6926	NaN	-0.228309	-0.8892	NaN	-0.930281	0.195901	0.662453		No
PCRP_PhaseII	22632-23060	STAT2	'1E5	K562	35.685		9010920	82.4738	54.7706	6		0			0.158468	0.0892006			-1.2145	-0.0220181	-0.733028	-0.00638453	0.348773	0.317491			-1.47471	1.83507	NaN	-0.243388	-1.01306	NaN	-1.23119	0.223484	0.65134		No
PCRP_PhaseII	23811-24136	RFX5	'1E5	K562	24.275		26237185	89.1058	12.7086	0		0			0.0457757	0.0113817			-0.864384	-1.50124	-1.55864	-0.866374	-1.63803	0.946729			-0.174598	-1.70048	NaN	-0.125389	0.420285	NaN	1.06192	-0.580088	-1.26919		No
PCRP_PhaseII	23545-23915	SOX9	'1E5	K562	0		9861698	89.5605	49.872	4		0			-0.389303	-0.128175			-1.44423	0.00372255	-0.656999	-0.245399	0.229371	0.330606			-1.68905	1.7882	NaN	-0.232376	-0.846089	NaN	-1.07351	0.224213	0.526489		No
PCRP_PhaseI	18719	ID1	'1E5	HepG2	175.51		2858829	78.2939	62.2774	208		0			-0.406275	-0.321388			-0.938215	-0.14545	-0.343148	-0.463912	-0.273063	0.21523			-0.93276	0.355749	-0.98547	-0.160925	-0.131838	NaN	-0.575574	0.273623	-0.0898183		No
PCRP_PhaseI	18953	ATRX	'1E4	K562	11.255		769061	82.5339	20.5282	3		0			0.974195	0.580634			0.34563	-0.415314	-0.402981	0.700497	0.0683508	0.238826			0.627993	0.56648	NaN	-0.567217	-0.180882	NaN	0.256193	-0.366564	0.356328		No
PCRP_PhaseII	23857	ZNF683	'1E4	K562	0.01		22920235	85.2878	17.1406	5		0			0.129328	0.0378605			-1.30221	-1.72096	-1.44541	-1.67554	-1.89265	0.995297			-0.0663047	-2.35484	NaN	-0.220125	0.458975	NaN	1.12913	-0.63154	-1.30872		No
PCRP_PhaseII	23502-23873	BACH2	'1E4	K562	1.955		22456810	87.432	14.6864	0		0			-0.120451	-0.0202233			-0.973424	-1.16824	-1.11536	-0.481054	-1.18187	0.846157			-0.313734	-1.70034	NaN	-0.14345	0.439424	NaN	0.806779	-0.748864	-0.806578		No
PCRP_PhaseII	23565-23924	DBX2	'1E4	K562	0		2347901	72.8188	76.7711	24		0			-0.336835	-0.0293018			-1.54946	-0.0762217	-0.896573	-0.107969	0.394359	0.388995			-2.10081	1.99061	NaN	-0.366248	-1.25003	NaN	-1.68947	0.483091	0.684027		No
PCRP_PhaseI	18722	SOX12	'1E4	HepG2	6.245		1562532	58.2593	75.4234	274		0			-0.393158	-0.0862503			-0.692987	-0.289522	-0.501617	-0.113986	-0.33323	0.274717			-0.644959	0.374628	-1.01588	-0.237276	-0.331478	NaN	-0.863965	0.378474	-0.0350741		No
PCRP_PhaseI	18283	SOX12	'1E4	HepG2	6.245		1559755	40.0174	86.8643	964		0			-0.304626	-0.141801			-0.998899	-0.195039	-0.74912	-0.427161	-0.398079	0.284732			-1.08471	0.405977	-1.03668	-0.249374	-0.376177	NaN	-1.25673	0.45545	-0.0442948		No
PCRP_PhaseI	17401	ZIC1	'1E3	MCF7	24.57		16992596	85.1507	41.5281	1		0			0.634195	0.244721			0.924109	0.0363636	0.0553055	0.319183	-0.0806472	-0.0699976			0.791601	-0.138432	0.779485	0.100048	-0.000124944	-0.0430563	0.259175	-0.325311	0.087372		No
PCRP_Phase0	17384	ZIC1	'1E3	MCF7	24.57		16699101	80.9484	60.8013	35		0			0.352825	0.142581			0.553694	0.0227801	-0.110075	0.126764	0.00922575	-0.0321507			0.403707	-0.0535454	1.3135	0.0369965	-0.0834967	-0.0160041	0.159514	0.0820385	0.00300681		No
PCRP_PhaseI	18314	DNMT3L	'1E3	HepG2	0.64		855196	50.4887	85.0641	0		0			-0.169946	-0.097182			-0.879374	-0.146793	-0.610279	-0.64874	-0.364163	0.248651			-1.02666	0.352859	-1.07645	-0.204758	-0.254785	NaN	-1.32245	0.496712	-0.0736545		No
PCRP_PhaseI	18753	DNMT3L	'1E3	HepG2	0.64		3181820	59.3668	75.1227	174		0			-0.219146	-0.266657			-0.708481	-0.103009	-0.47993	-0.755009	-0.269573	0.20181			-0.803593	0.363406	-0.554696	-0.168683	-0.182044	NaN	-1.08141	0.303194	-0.0987987		No
PCRP_PhaseI	18739	DNMT3A	'1E2	HepG2	9.47		6095143	60.5063	72.493	407		0			-0.0303663	0.302524			-0.371098	-0.100899	-0.12041	0.164606	-0.193582	0.120659			-0.44586	0.0803286	-0.132463	-0.158762	-0.0997853	NaN	0.48602	0.50139	-0.0802628		No
PCRP_PhaseI	17404	EIF2S1	'1E2	MCF7	233.055		26447885	84.526	36.6492	65		0			0.61277	0.219601			0.851997	0.0298523	-0.14594	0.0612887	-0.113938	-0.0379839			0.688702	-0.11683	0.642278	0.121344	-0.138269	0.0712754	0.231813	-0.234089	0.10045		No
PCRP_PhaseI	17456	LIN28A	'1E2	K562	1.615		8616139	80.7788	80.2708	24		0			-0.0440189	0.0814372			-1.27563	-0.172445	-1.09771	-0.0184586	0.427379	0.439471			-1.82859	1.85146	NaN	-0.412634	-1.12418	NaN	-0.96518	0.706943	0.648284		No
PCRP_PhaseI	18678	LIN28A	'1E2	K562	1.615		7712309	82.8331	87.6431	118		0			-0.507475	0.0674355			-1.9992	-0.163654	-1.07234	-0.204631	0.298603	0.493438			-2.55641	2.04987	NaN	-0.456778	-1.40812	NaN	-1.86021	0.788113	0.632742		No
PCRP_PhaseI	19086-19598	SIRT6	'1E2	K562	NaN		4930480	79.245	62.5873	3		0			-0.650174	-0.2809			-2.15788	-0.0430152	-1.08174	-0.639034	-0.0346173	0.50552			-2.59775	2.15278	NaN	-0.45807	-1.35998	NaN	-1.80925	0.872447	0.203972		No
PCRP_PhaseII	23521-23892	SIRT1	'1E11	K562	9.36		5325071	79.5208	61.5364	4		0			0.379893	0.122298			-0.876399	-0.0600577	-0.562301	0.0533765	0.409131	0.25706			-1.12563	1.67895	NaN	-0.293071	-0.775127	NaN	-1.06787	0.0797978	0.652727		No
PCRP_PhaseI	18308	ZNF444	'1E11	HepG2	18.715		8176265	50.3612	81.2557	13708		0			-0.0817056	-0.0323862			-0.515338	-0.053761	-0.417521	-0.304069	-0.159955	0.146223			-0.605181	0.228482	-0.602884	-0.0664909	-0.221862	NaN	-0.648534	0.22252	-0.0131309		No
PCRP_PhaseI	18747	ZNF444	'1E11	HepG2	18.715		5626732	57.3273	72.201	355		0			-0.0595168	-0.0473503			-0.412171	-0.0950224	-0.232284	-0.948923	-0.0115198	0.124215			-0.339682	0.11629	-0.293798	-0.0667997	-0.0499885	NaN	-0.735857	0.227046	-0.0209218		No
PCRP_PhaseI	18407	ZNF584	'1E10	K562	15.485		5817290	39.4266	79.6564	206		0			0.528331	0.150812			-0.88942	-0.285054	-1.02919	-0.586083	0.0827732	0.511812			-1.11538	1.79918	NaN	-0.336502	-0.983577	NaN	-0.792703	0.658682	0.371266		No
PCRP_PhaseII	22956-23073	ZNF277	'1E10	K562	16.555		22614910	88.2694	33.5087	0		0			-0.0992884	-0.105989			-0.795514	-0.0767217	-0.428115	-0.228433	-0.0297628	0.308447			-0.587457	0.641097	NaN	0.0127749	-0.0415224	NaN	-0.0746264	-0.758926	0.215455		No
PCRP_PhaseII	22978-23084	OTX2	'1E10	K562	0.005		11702189	90.1802	40.9297	0		0			-0.251796	-0.171551			-1.10826	-0.0417186	-0.653064	0.37612	0.15178	0.32767			-1.15657	1.33989	NaN	-0.0999938	-0.383578	NaN	-0.437115	-0.309635	0.419519		No
PCRP_PhaseI	19003	ZNF230	'1E1	K562	1.885		4270620	60.7991	86.6117	30		0			0.621405	0.484062			-1.44887	-0.157923	-1.07128	-0.0948024	0.310594	0.462111			-1.955	2.05357	NaN	-0.448297	-1.41336	NaN	-1.61887	0.682173	0.621509		No
PCRP_PhaseII	23788-24113	ZBED1	'1E1	K562	4.855		19455514	84.7598	17.0465	0		0			0.126447	0.141391			-0.680602	-0.622506	-0.729482	0.0341608	-0.457314	0.604479			-0.324756	-1.44192	NaN	0.0669449	0.305652	NaN	0.793169	-0.832958	-0.341115		No
PCRP_PhaseIII	26306	NFKB2	'1E1	K562	5.42		17852480	83.9387	27.447	97		0			0.224189	0.038562			-0.143012	-0.784486	-0.622809	-0.904743	-1.06527	0.630355			0.264955	-0.472938	NaN	-0.0455489	0.219189	NaN	0.518694	-0.556906	-0.792901		No
PCRP_PhaseI	17477	HDAC6	'1D9	K562	67.73		319944	76.9455	84.4428	1		0			0.320719	0.328642			-1.77943	-0.0972875	-1.29746	-0.47102	0.323367	0.487951			-2.38638	2.08315	NaN	-0.434381	-1.50263	NaN	-2.16233	0.720021	0.671416		No
PCRP_PhaseI	18699	HDAC6	'1D9	K562	67.73		9773144	83.0773	83.33	117		0			0.228774	0.273325			-1.58892	-0.120959	-0.914682	-0.12557	0.329003	0.426456			-2.00684	1.99715	NaN	-0.373044	-1.31332	NaN	-1.65457	0.555583	0.683338		No
PCRP_PhaseII	23786-24111	SP110	'1D9	K562	1.37		2876483	81.1498	70.9977	8		0			0.0771803	0.131551			-1.28832	-0.0476803	-0.722375	-0.17175	0.390683	0.328533			-1.64466	1.85299	NaN	-0.282134	-1.05444	NaN	-1.56452	0.33889	0.692679		No
PCRP_PhaseII	23515-23886	TP53	'1D9	K562	5.405		4222190	83.4334	68.4588	3		0			0.188432	0.0497665			-1.06043	-0.050652	-0.611754	-0.0128442	0.366983	0.29026			-1.1996	1.68184	NaN	-0.251052	-0.898717	NaN	-0.854653	0.16288	0.74337		No
PCRP_PhaseI	18281	POU5F1	'1D9	HepG2	2.62		808008	32.4607	90.0391	21		0			-0.238846	-0.0281764			-1.0382	-0.235124	-0.484694	-0.626628	-0.340608	0.275762			-0.997201	0.323553	-1.00324	-0.307239	-0.347963	NaN	-0.950355	0.637905	-0.0337864		No
PCRP_PhaseI	18655	MITF	'1D9	K562	6.4		462225	85.9668	80.5543	0		0			-0.394131	-0.0434658			-1.78176	-0.152155	-1.06147	-0.294276	0.296948	0.480421			-2.24137	2.09549	NaN	-0.545898	-1.45982	NaN	-1.49742	0.812268	0.571489		No
PCRP_PhaseI	18720	POU5F1	'1D9	HepG2	2.62		2768539	74.9949	67.6559	316		0			-0.353337	-0.0520578			-0.736363	-0.175772	-0.52341	-0.394697	-0.280858	0.234781			-1.19558	0.30149	-0.605401	-0.218907	-0.214864	NaN	-0.870104	0.276075	0.0164625		No
PCRP_PhaseII	23770-24095	SCAND3	'1D9	K562	29.04		20696613	88.3325	14.036	0		0			-0.422234	-0.0584694			-1.49439	-0.714663	-1.08886	-0.551931	-0.301865	0.724796			-0.767526	-1.1245	NaN	-0.00791991	0.334246	NaN	0.742278	-0.867356	-0.158028		No
PCRP_PhaseII	23816	RPRD1A	'1D9	K562	76.155		16958018	88.0768	29.5552	10		0			-0.33472	-0.117249			-0.932967	-0.818229	-1.10165	-0.765559	-1.10461	0.777857			-0.558562	-0.428477	NaN	-0.0398854	0.283885	NaN	0.602344	-0.269327	-0.67153		No
PCRP_PhaseII	23544-23914	ETS2	'1D9	K562	NaN		20077948	88.2797	29.9152	20		0			-0.40594	-0.168164			-1.11647	-0.00806977	-0.476127	-0.36884	0.0999011	0.296415			-1.00706	1.01687	NaN	0.0475842	-0.19215	NaN	-0.315821	-0.596695	0.285201		No
PCRP_PhaseI	19015	DBX2	'1D8	K562	0		1208773	62.6287	85.9401	3		0			1.0146	0.605023			-1.1877	-0.188205	-1.01179	-0.0929804	0.280392	0.454826			-1.6279	2.04291	NaN	-0.4503	-1.4022	NaN	-1.52279	0.572869	0.657777		No
PCRP_PhaseI	18378	SOX10	'1D8	K562	0		4324636	48.279	76.2732	78		0			1.01932	0.511078			-0.29969	-0.167367	-0.615064	-0.0238112	0.238607	0.291049			-0.498305	1.68606	NaN	-0.344824	-0.882787	NaN	-0.941611	0.265432	0.551815		No
PCRP_PhaseII	23809-24134	YBX3	'1D8	K562	30.8		18012843	87.7538	17.4391	30		0			0.359771	0.154203			0.106683	-0.656363	-0.451762	-0.133251	-0.540082	0.478008			0.31608	-0.921676	NaN	-0.00740152	0.208543	NaN	0.54234	-0.888344	-0.330259		No
PCRP_PhaseII	23807-24132	ZNF585B	'1D8	K562	3.305		6480165	83.1278	48.2465	16		0			-0.309845	-0.0133233			-1.29942	-0.023943	-0.615569	0.0743089	0.272385	0.311359			-1.39226	1.56861	NaN	-0.192914	-0.617372	NaN	-0.754936	-0.0881859	0.601516		No
PCRP_PhaseI	18423	YBX2	'1D8	MCF7	5.265		21932273	77.2589	47.9889	24		0			0.0893815	-0.0194079			0.370284	-0.00199354	-0.0207494	0.0141215	-0.0316551	-0.0158914			0.218485	-0.0860433	0.838637	0.0890758	0.0089864	-0.0985469	0.0332844	-0.156776	0.0708387		No
PCRP_PhaseI	19030	FOSB	'1D8	K562	0.16		19257867	78.7103	65.4725	12		0			-0.0751805	-0.0323574			-0.586363	-0.151534	-0.511515	-0.123537	0.0181386	0.33348			-0.870303	1.32214	NaN	-0.228383	-0.47321	NaN	-0.143604	0.543324	0.16278		No
PCRP_PhaseI	18927	FOSB	'1D8	K562	0.16		615554	76.9545	25.6567	3		0			0.0846286	-0.0436126			-0.0934426	-0.579379	-0.307215	-0.601072	0.408328	0.325419			0.235676	1.28108	NaN	-0.341657	-0.552258	NaN	-0.903678	-0.915001	0.753185		No
PCRP_PhaseIII	26297	DBX2	'1D8	K562	0		21030299	86.2905	20.7333	0		0			-0.142162	-0.051355			-1.16863	-1.01545	-1.34736	-1.82564	-1.27567	0.869348			-0.293743	-1.59106	NaN	-0.0781787	0.445494	NaN	0.87889	-0.8857	-1.13262		No
PCRP_PhaseII	22221-22808	TAX1BP1	'1D8	K562	71.57		12588980	80.5619	43.7079	56		0			-0.356658	-0.177025			-1.24322	-0.0558849	-0.627288	-0.0750209	0.203167	0.341625			-1.31416	1.43775	NaN	-0.102521	-0.481014	NaN	-0.687626	-0.288572	0.531769		No
PCRP_PhaseI	19107-19615	PRDM13	'1D8	K562	0		9352910	80.8775	57.5467	4		0			-0.512508	-0.188011			-1.9498	-0.0331071	-1.02332	-0.444322	-0.0585997	0.485622			-2.31626	2.1359	NaN	-0.416126	-1.28825	NaN	-1.59587	0.781375	0.15802		No
PCRP_PhaseI	19014	ZNF770	'1D7	K562	30.74		2086729	67.747	84.41	11		0			0.682043	0.5907			-1.46168	-0.154794	-1.06478	-0.0430922	0.258306	0.468221			-2.0125	2.0536	NaN	-0.422342	-1.42764	NaN	-1.52448	0.675305	0.620485		No
PCRP_PhaseI	18402	ZNF696	'1D7	K562	2.545		5764821	47.3123	77.9091	125		0			0.481987	0.221429			-0.774735	-0.133168	-0.762109	-0.330549	0.337954	0.348983			-1.07391	1.70582	NaN	-0.279344	-0.840131	NaN	-1.03638	0.328031	0.541521		No
PCRP_PhaseI	18319	SMAD7	'1D7	HepG2	9.695		4982638	47.4553	84.985	1181		0			0.164881	0.0945827			-0.411001	-0.0410439	-0.513073	-0.372797	-0.219287	0.150482			-0.531	0.162723	-0.53566	-0.020192	-0.262888	NaN	-0.638642	0.229002	0.016695		No
PCRP_PhaseII	23534-23905	DIS3	'1D7	K562	22.035		22977203	80.2653	22.7476	96		0			0.215385	0.0908828			-0.567082	-1.41815	-1.0894	-1.91378	-1.58492	0.878414			0.13282	-0.821071	NaN	-0.281802	0.364572	NaN	0.946293	-0.57706	-1.22683		No
PCRP_PhaseII	23505-23876	SRY	'1D7	K562	NaN		7211182	84.6681	49.8621	12		0			-0.0408292	-0.03769			-1.07422	0.0377618	-0.551023	-0.0215895	0.360879	0.231744			-1.18659	1.59079	NaN	-0.168756	-0.651228	NaN	-0.788352	-0.139865	0.576065		No
PCRP_PhaseI	18446	RNF20	'1D7	MCF7	26.49		25162527	87.0087	43.563	5		0			-0.441897	-0.307399			-0.355473	0.107617	-0.0361557	-0.469591	-0.0656343	-0.0266198			-0.433543	-0.0342181	0.533412	0.112962	0.044317	-0.0509698	-0.327964	-0.105564	0.0238856		No
PCRP_PhaseII	23585	SCML4	'1D6	K562	0		17530408	73.9269	27.2625	153		0			-0.0591549	0.0234432			-1.3271	-1.09567	-1.3665	-0.989239	-0.728107	0.858418			-0.587559	0.0680002	NaN	-0.180366	0.215556	NaN	0.686905	-0.199944	-0.517663		No
PCRP_PhaseII	22600-23046	KLF10	'1D6	K562	6.52		252411	83.3523	84.9553	27		0			0.083281	0.0159206			-1.7305	-0.0679725	-1.06645	-0.479142	0.387195	0.430096			-1.96265	1.99615	NaN	-0.335401	-1.39625	NaN	-3.06453	0.68968	0.690007		No
PCRP_PhaseII	23785-24110	ZNF428	'1D6	K562	9.47		6744907	87.6576	45.2778	4		0			-0.042517	-0.00978733			-0.881191	-0.0319672	-0.330639	-0.0475268	0.343228	0.196684			-0.867683	1.34095	NaN	-0.126976	-0.487304	NaN	-0.600781	-0.217824	0.573441		No
PCRP_PhaseII	23853-24500	ZNF296	'1D6	K562	0.13		26133053	82.3785	31.2062	97		0			-0.0040357	-0.0392823			-0.622224	-0.33401	-0.624949	-0.607767	-0.250444	0.479337			-0.323234	0.358118	NaN	-0.030064	0.0634523	NaN	0.214005	-0.704208	-0.0243088		No
PCRP_PhaseIII	26308-28255	NPM3	'1D5	K562	57.16		2186516	78.8572	88.0887	260		0			0.0269585	0.291377			-1.46543	-0.156245	-0.97016	-0.0235283	0.336461	0.440736			-1.89811	1.97949	NaN	-0.3987	-1.33138	NaN	-1.66488	0.624432	0.704425		No
PCRP_PhaseI	18715	MAZ	'1D5	K562	151.2		252729	73.4533	89.9713	12		0			0.788274	0.119723			-1.06497	-0.127349	-0.760784	0.272009	0.443819	0.336596			-1.50329	1.946	NaN	-0.414333	-1.23825	NaN	-1.44917	0.497133	0.70065		No
PCRP_PhaseI	17493	MAZ	'1D5	K562	151.2		1199514	81.0366	82.5215	1		0			0.231073	-0.00509158			-1.74468	-0.22528	-1.21943	0.147946	0.259225	0.526615			-2.17474	2.12474	NaN	-0.470377	-1.51829	NaN	-1.74954	0.587186	0.663212		No
PCRP_PhaseII	22959	PCGF3	'1D5	K562	27.355		15585701	85.808	30.978	0		0			-0.201428	-0.0644143			-1.184	-1.15537	-1.08965	-1.17706	-1.0002	0.85015			-0.282473	-1.08212	NaN	-0.257399	0.378151	NaN	0.824436	-0.438425	-0.609303		No
PCRP_PhaseI	18318	PCGF3	'1D5	HepG2	51.705		1027269	24.1246	92.8745	329		0			0.188411	-0.110421			-0.733006	-0.234183	-0.626296	-0.445116	-0.429299	0.279978			-0.762496	0.306474	-0.962393	-0.214464	-0.349736	NaN	-0.799589	0.52852	-0.0347103		No
PCRP_PhaseI	18377	MEF2C	'1D4	K562	21.795		4183009	71.9874	68.7109	13		0			0.828103	0.363115			-0.401272	-0.121323	-0.666972	0.0239846	0.216752	0.297341			-0.783269	1.65166	NaN	-0.279571	-0.850828	NaN	-0.758237	0.328052	0.552983		No
PCRP_PhaseI	19033	TAX1BP1	'1D4	K562	71.57		3827028	79.4106	73.1283	7		0			0.27575	0.00457887			-1.43566	-0.145088	-0.991932	-0.0655784	0.319375	0.441743			-1.86377	2.04569	NaN	-0.400301	-1.33491	NaN	-1.6772	0.530654	0.61349		No
PCRP_PhaseI	19152-19546	MESP2	'1D4	K562	0.07		12854292	81.7088	57.7889	982		0			0.0969531	-0.135938			-1.08507	-0.0472389	-0.764368	0.101785	0.349777	0.323975			-1.4731	1.89491	NaN	-0.387255	-1.09806	NaN	-1.20062	0.427559	0.646884		No
PCRP_PhaseII	22938-23064	MLLT10	'1D4	K562	53.12		25011512	87.6556	25.3146	0		0			-0.617047	-0.249358			-1.58727	-0.457393	-0.878519	-0.860432	-0.298807	0.63568			-1.04072	-0.0809145	NaN	0.0890068	0.222183	NaN	0.200188	-1.10707	0.00334074		No
PCRP_PhaseI	19149	SIRT5	'1D4	K562	8.8		15586636	83.5308	43.2421	913		0			-0.435704	-0.418552			-1.20391	0.152328	-0.319644	-0.264083	0.582843	0.0594065			-1.48679	1.54684	NaN	-0.28732	-0.612119	NaN	-0.627623	-0.0197673	0.694712		No
PCRP_PhaseII	23836-24492	KHDRBS3	'1D3	K562	1.465		1754537	74.2607	81.7912	11		0			0.390078	0.211957			-1.4752	-0.0551428	-0.913279	0.00978639	0.358275	0.382281			-1.72692	1.94551	NaN	-0.334618	-1.23565	NaN	-1.63096	0.545649	0.648549		No
PCRP_PhaseI	17406	FOXJ2	'1D3	MCF7	4.775		28976396	84.585	38.7308	146		0			0.355917	0.157521			0.741943	-0.0943067	-0.0967296	0.22606	-0.0540993	0.0094477			0.693655	-0.0503606	0.648446	-0.0647441	-0.141556	-0.174096	0.137484	-0.112743	0.125879		No
PCRP_PhaseI	19072	HOXC8	'1D3	K562	0.35		2734704	76.8705	75.078	4		0			0.262597	0.123852			-1.36405	-0.123406	-1.00119	-0.0158947	0.299985	0.432153			-1.8534	2.01325	NaN	-0.449109	-1.29723	NaN	-1.45654	0.558497	0.65939		No
PCRP_PhaseI	18301	BCL6	'1D3	HepG2	37.06		7325883	55.376	81.6634	2696		0			0.235978	0.0828901			0.374275	0.00631489	-0.197907	-0.219356	-0.117906	6.31247e-05			0.428204	0.0214658	0.144711	0.0174326	-0.184577	NaN	0.233766	0.232223	-0.0858454		No
PCRP_PhaseI	19159	EIF4E	'1D3	K562	87.385		15709907	77.2889	43.1595	711		0			0.167834	-0.213656			-0.366384	-0.0189703	-0.26752	0.0264507	0.418827	0.088041			-0.608267	1.40223	NaN	-0.405343	-0.494894	NaN	-0.428611	-0.0555925	0.59119		No
PCRP_PhaseI	19092-19602	ZNFX1	'1D3	K562	1.945		15233986	81.5449	48.5957	2		0			-0.598589	-0.274384			-1.71625	0.0885649	-0.939583	-0.318235	-0.209044	0.421917			-1.97364	1.98345	NaN	-0.241967	-0.93579	NaN	-1.12383	0.506212	0.0138842		No
PCRP_PhaseIII	26437	SCXA	'1D2	K562	NaN		21186284	89.0707	25.712	257		0			0.162908	0.15312			0.497406	-1.0352	-0.2105	-0.994682	-1.83487	0.534628			0.346274	-1.39142	NaN	-0.241632	0.401183	NaN	0.695123	-0.717561	-1.3065		No
PCRP_PhaseII	22955-23072	YEATS4	'1D2	K562	26.915		1731575	84.4901	76.0868	0		0			-0.0347396	0.0876007			-1.51092	-0.0181938	-0.877814	-0.318114	0.292284	0.379091			-1.80815	1.93817	NaN	-0.330178	-1.17532	NaN	-2.01548	0.484593	0.662496		No
PCRP_PhaseII	23550	SCXA	'1D2	K562	NaN		25220644	89.5749	18.4462	311		0			0.00312301	0.0495542			0.539198	-1.28355	-0.599023	-1.18566	-1.5262	0.646831			0.156241	-1.36017	NaN	-0.270235	0.392108	NaN	0.854477	-0.29945	-1.3448		No
PCRP_PhaseII	23832	NR1D1	'1D2	K562	0.205		27034106	85.0886	22.265	0		0			-0.0943396	-0.00281874			-0.892349	-1.4168	-1.40793	-1.36756	-1.5561	0.926974			-0.210446	-1.84815	NaN	-0.103126	0.405645	NaN	0.894261	-0.432294	-0.992709		No
PCRP_PhaseII	22209	POU5F1	'1D2	K562	0		19801936	87.1925	16.8539	0		0			-0.503388	-0.216353			-1.37111	-0.887836	-1.25164	-1.6386	-0.712973	0.815496			-0.847672	-0.720596	NaN	-0.0325732	0.345741	NaN	0.736015	-0.60473	-0.508821		No
PCRP_PhaseI	17481	ZNF174	'1D12	K562	8.575		4171734	83.0514	81.4246	19		0			-0.211637	0.0916315			-1.47833	-0.211891	-1.36294	-0.234562	0.327981	0.52308			-2.0539	1.97745	NaN	-0.470264	-1.37373	NaN	-1.35341	0.816953	0.674068		No
PCRP_PhaseII	22851-23321	NFE2L2	'1D12	K562	65.3		4479551	88.7161	79.3706	8		0			0.0544194	0.0457785			-1.64152	-0.0812548	-0.943881	-0.154936	0.406519	0.40286			-2.05315	1.96003	NaN	-0.332373	-1.26031	NaN	-1.7743	0.528455	0.704302		No
PCRP_PhaseI	19103-19612	UBR2	'1D12	K562	NaN		8632853	82.3926	56.5485	5		0			-0.377061	-0.148427			-1.76345	-0.0708623	-1.01366	-0.524333	-0.000659557	0.486618			-2.15593	2.09134	NaN	-0.409314	-1.25267	NaN	-1.51377	0.72408	0.275635		No
PCRP_PhaseII	23554	SMAD4	'1D12	K562	38.35		20751073	89.3254	23.0846	17		0			-0.479507	-0.217644			-1.41505	-0.702208	-1.18404	-0.600753	-0.784451	0.767478			-0.918916	-0.481064	NaN	0.0263189	0.268006	NaN	0.635149	-0.295432	-0.419176		No
PCRP_PhaseI	18313	RFX3	'1D11	HepG2	3.05		4966145	66.4515	79.9566	2736		0			0.509545	0.156257			-0.00644086	-0.0338095	-0.191515	-0.470737	-0.242906	0.0815534			-0.0833367	0.149831	-0.137358	0.0387017	-0.190224	NaN	-0.422919	0.130666	-0.0646987		No
PCRP_PhaseII	23495-23866	NR1H2	'1D11	K562	18.99		14177733	85.3087	26.393	18		0			-0.185578	-0.0598685			-1.14495	-0.243797	-0.621754	-0.0914611	-0.0697827	0.456518			-0.525039	0.602742	NaN	-0.0257708	-0.0499217	NaN	0.413414	-0.727192	0.176766		No
PCRP_PhaseII	22597	HSF1	'1D11	K562	27.005		13384782	84.9214	39.5624	17		0			-0.291738	-0.156129			-0.993055	-0.485044	-0.818936	-0.256759	-0.362837	0.600267			-0.612321	0.643417	NaN	-0.0529549	-0.0492803	NaN	0.306658	-0.356741	0.0820662		No
PCRP_PhaseI	19128-19532	MBNL3	'1D11	K562	0.12		23181181	78.7033	46.7111	8533		0			-0.175782	-0.398867			-1.18966	0.130862	-0.491034	-0.294111	0.533025	0.13775			-1.44908	1.68847	NaN	-0.185398	-0.775072	NaN	-0.935024	-0.0341348	0.640222		No
PCRP_PhaseI	18692	DDIT3	'1D10	K562	68.57		465672	82.811	87.8135	1		0			0.0405134	0.404214			-1.72722	-0.123365	-0.991478	-0.0322166	0.446669	0.423316			-2.23001	1.96036	NaN	-0.347016	-1.32745	NaN	-1.60753	0.717433	0.67213		No
PCRP_PhaseII	22952	ECD	'1D10	K562	43.725		18054468	84.9901	28.2191	39		0			-0.133031	-0.0471821			-0.968522	-0.91389	-1.03511	-1.38304	-0.924334	0.786696			-0.37966	-0.847371	NaN	-0.052323	0.334698	NaN	0.626836	-0.384486	-0.741611		No
PCRP_PhaseII	23795-24120	ZIM2	'1D10	K562	0		23265400	87.9491	16.3157	13		0			-0.199703	-0.0658873			-1.50007	-1.42478	-1.71384	-2.38621	-1.35478	0.976526			-0.34546	-1.20576	NaN	-0.150265	0.420564	NaN	0.718688	-0.771067	-0.770536		No
PCRP_PhaseI	19121-19621	SRY	'1D10	K562	NaN		6161427	82.4259	59.5778	0		0			0.0397834	-0.153981			-1.58791	-0.0373832	-0.869228	-0.438092	-0.0484744	0.44537			-1.87316	2.04277	NaN	-0.371455	-1.14732	NaN	-1.66392	0.68626	0.229857		No
PCRP_PhaseI	18634	ZBTB46	'1D1	K562	0.86		6716210	82.0224	75.9522	9		0			0.070908	0.196127			-1.41723	-0.105134	-0.830428	0.0320297	0.392205	0.380118			-1.82675	1.92263	NaN	-0.329715	-1.18807	NaN	-1.36666	0.425693	0.712402		No
PCRP_PhaseI	19101-19610	GTF2B	'1D1	K562	NaN		5464838	73.936	62.1816	19		0			0.376748	0.00834644			-1.50774	-0.190889	-0.9839	-0.36064	0.0642737	0.507929			-2.02193	2.14165	NaN	-0.488785	-1.39958	NaN	-1.88222	0.8128	0.313165		No
PCRP_PhaseII	23777-24102	ZC3H15	'1D1	K562	108.635		9748732	89.5375	32.1061	1		0			-0.204431	-0.0752845			-1.21949	-0.0269377	-0.491325	-0.150259	0.263983	0.284477			-1.02415	1.42689	NaN	-0.155399	-0.431273	NaN	-0.654972	-0.496109	0.505921		No
PCRP_PhaseII	23825-24490	MINA	'1D1	K562	16.715		14856768	89.6396	36.7323	0		0			-0.501406	-0.210921			-1.61435	-0.00158821	-0.754504	-0.160638	0.137148	0.376615			-1.55614	1.35427	NaN	0.00654175	-0.405443	NaN	-0.54502	-0.377435	0.447238		No
PCRP_PhaseI	18410	ELF1	'1C9	MCF7	53.935		26323544	79.1672	40.2782	469		0			0.328419	-0.0478208			0.604798	-0.036826	0.279656	-0.0654963	0.0996229	-0.0458578			0.531712	-0.154648	1.06423	0.00779661	0.208107	0.0961477	-0.0415648	-0.296075	0.114082		No
PCRP_PhaseII	22963-23077	FOSB	'1C9	K562	0.16		13839605	87.9936	37.4982	3		0			-0.15611	-0.117951			-1.12521	-0.00724297	-0.493411	-0.377748	0.0675852	0.306378			-1.05376	1.15443	NaN	-0.00501336	-0.285731	NaN	-0.224182	-0.508371	0.37267		No
PCRP_PhaseI	18451	DACH1	'1C9	MCF7	0.37		6674306	69.8059	64.4641	38		0			-0.158139	-0.17195			0.0978075	-0.152708	0.301413	-0.0292839	-0.169308	0.0388988			0.223443	0.140735	-0.931339	-0.205897	0.102638	-0.0330343	-0.113337	0.00499483	-0.148055		No
PCRP_PhaseI	19038	ETS1	'1C8	K562	0.045		125773	66.9394	75.6898	0		0			0.0570417	0.41723			-1.63527	-0.13438	-1.11208	0.120136	0.429096	0.442112			-1.92966	2.02477	NaN	-0.504285	-1.47749	NaN	-1.30146	0.660743	0.781799		No
PCRP_PhaseI	18633	RAX	'1C8	K562	0		2593438	78.4853	77.53	5		0			0.0813812	0.212786			-1.79957	-0.168363	-1.03467	-0.101428	0.320284	0.476335			-2.27171	2.08593	NaN	-0.471398	-1.42098	NaN	-1.94963	0.614739	0.670801		No
PCRP_PhaseI	18399	ZNF654	'1C7	K562	2.185		3507718	48.6609	75.999	55		0			0.66624	0.330516			-1.22583	-0.155141	-0.905213	-0.163269	0.223135	0.437208			-1.57502	1.96916	NaN	-0.341716	-1.24768	NaN	-1.47922	0.465732	0.631016		No
PCRP_PhaseI	18322	AKNA	'1C7	HepG2	2.395		6994403	41.8741	86.1635	11161		0			-0.0664924	0.0433819			-0.613221	-0.0983885	-0.539164	-0.39813	-0.218678	0.191352			-0.627499	0.274076	-0.784145	-0.118822	-0.256209	NaN	-0.643746	0.298394	-0.0240828		No
PCRP_PhaseI	18761	AKNA	'1C7	HepG2	2.395		4427617	59.6723	72.9611	308		0			-0.00665195	0.00824124			-0.618443	-0.137455	-0.221297	0.0801778	-0.297804	0.177962			-0.518216	0.265772	-0.561334	-0.203959	0.0140677	NaN	-0.499616	0.320891	-0.105335		No
PCRP_PhaseI	18433	DVL2	'1C7	MCF7	7.305		1968829	71.2078	67.3944	1		0			0.0565198	-0.0569193			-0.0956182	-0.391281	-0.284377	-0.0867836	-0.160874	0.182784			-0.0079509	0.343963	0.229585	-0.447765	-0.254569	-0.13839	-0.94034	-0.00614206	-0.138469		No
PCRP_PhaseII	22951-23070	CXXC1	'1C7	K562	25.995		5641048	89.0699	60.7697	0		0			-0.293488	-0.126659			-1.65403	0.0650356	-0.745118	-0.195216	0.320903	0.311443			-1.71679	1.76131	NaN	-0.169841	-0.923885	NaN	-0.95261	0.237068	0.620113		No
PCRP_PhaseI	19119-19619	UBQLN2	'1C7	K562	NaN		6144328	75.7248	59.2552	4		0			-0.192323	-0.21193			-1.5224	0.0324561	-0.880346	-0.54731	-0.0216037	0.409042			-2.05783	2.0812	NaN	-0.370245	-1.05635	NaN	-1.50562	0.490164	0.148918		No
PCRP_PhaseI	19087	G3BP2	'1C7	K562	71.015		10759323	77.0683	53.6369	12		0			-0.518655	-0.2477			-1.32526	-0.203958	-1.34856	-0.720416	-0.553474	0.622499			-1.38396	1.61623	NaN	-0.351911	-0.498381	NaN	-0.224972	0.794294	-0.439594		No
PCRP_PhaseII	24029-24385	GMEB2	'1C6	K562	4.745		2240129	74.7035	89.2542	93		0			0.74469	0.426913			-0.995799	-0.0574113	-0.826125	-0.200694	0.382173	0.334519			-1.36036	1.83427	NaN	-0.339281	-1.15381	NaN	-1.31196	0.604703	0.67332		No
PCRP_PhaseI	18979	STAT6	'1C6	K562	NaN		4359782	67.0086	84.6515	12		0			0.519182	0.40014			-1.38693	-0.177126	-1.09365	-0.0559527	0.289023	0.472625			-1.9034	2.06362	NaN	-0.462911	-1.42653	NaN	-1.53268	0.691693	0.602898		No
PCRP_PhaseI	18957	TFAP2A	'1C6	K562	0.095		180674	79.5298	24.1272	3		0			0.554157	0.394269			NaN	-0.275511	-0.128878	NaN	-0.528812	0.525782			1.30968	1.14863	NaN	-1.81514	-0.440782	NaN	NaN	-0.462488	0.589026		No
PCRP_PhaseI	19060	TFAP2A	'1C6	K562	0.095		4082621	79.8527	73.7672	10		0			0.33975	0.282973			-0.764362	-0.164699	-0.734578	-0.429533	0.37866	0.350634			-1.22255	1.7093	NaN	-0.29219	-0.921016	NaN	-1.25973	0.465918	0.637342		No
PCRP_PhaseII	23548-23918	ZEB2	'1C6	K562	48.61		1026128	84.5189	81.827	3		0			-0.200934	0.0937647			-1.76867	-0.0294276	-0.960584	-0.30614	0.235939	0.421018			-2.33589	1.98816	NaN	-0.398425	-1.26578	NaN	-1.78698	0.825265	0.523025		No
PCRP_PhaseII	23499-23870	HIF3A	'1C6	K562	0		9005278	82.5314	41.8918	18		0			0.0516377	0.0440902			-0.68069	-0.0711906	-0.552813	0.254775	0.269098	0.263234			-0.789364	1.37606	NaN	-0.184977	-0.475297	NaN	-0.60588	-0.315279	0.571099		No
PCRP_PhaseI	19145-19541	SET	'1C6	K562	251.89		19491307	82.0722	47.2721	1308		0			0.131445	-0.218344			-0.78851	0.0311993	-0.501002	0.180529	0.363958	0.189825			-1.00464	1.75035	NaN	-0.285951	-0.87589	NaN	-0.936593	0.138919	0.58839		No
PCRP_PhaseI	19004	ZFP90	'1C5	K562	0.88		7359241	59.5101	84.6649	117		0			0.535599	0.428994			-1.11658	-0.183104	-0.935345	-0.0900561	0.266712	0.437875			-1.58847	1.98627	NaN	-0.455821	-1.24151	NaN	-1.22871	0.668992	0.530492		No
PCRP_PhaseI	18380	CBFB	'1C5	K562	27.785		3656541	33.9205	82.5077	108		0			0.69543	0.424977			-1.06145	-0.161991	-0.836652	-0.0890892	0.243495	0.411857			-1.31287	1.93025	NaN	-0.383896	-1.12226	NaN	-1.46988	0.417204	0.588476		No
PCRP_PhaseII	24055-24398	ZNF830	'1C5	K562	7.1		4956482	86.3405	76.4739	21		0			0.729427	0.392792			-0.407882	-0.119989	-0.624891	0.138238	0.378612	0.254041			-0.791323	1.69813	NaN	-0.387044	-0.925205	NaN	-0.830421	0.426746	0.624153		No
PCRP_PhaseI	18376	LDB1	'1C5	K562	93.495		1920919	70.3851	69.7143	2		0			0.95907	0.388794			-1.21508	-0.17625	-0.922077	-0.243547	0.345983	0.428761			-1.5895	1.99574	NaN	-0.407898	-1.26835	NaN	-1.97438	0.492129	0.662983		No
PCRP_PhaseI	18943	ABTB1	'1C5	K562	0.895		376656	67.8677	34.8078	8		0			0.487482	0.2381			-2.44854	-0.612546	-0.510307	NaN	-1.32528	0.729316			-0.00718058	1.1537	NaN	-0.0165241	-0.605636	NaN	0.553905	0.220655	0.102244		No
PCRP_PhaseI	17431-22039	MYOG	'1C5	MCF7	0.045		7600490	78.8006	51.0943	0		0			0.636942	0.234038			0.918286	-0.0662598	0.287284	0.499444	0.184511	-0.0679161			0.866229	-0.114959	0.733021	-0.0929135	0.225007	-0.000711485	0.279303	-0.382165	0.0814629		No
PCRP_PhaseI	19046	ABTB1	'1C5	K562	0.895		9885173	69.4961	72.6211	82		0			0.312603	0.165629			-1.02976	-0.0802435	-0.77869	-0.0115274	0.249089	0.35946			-1.33784	1.8406	NaN	-0.279461	-1.00221	NaN	-0.988618	0.374935	0.526219		No
PCRP_PhaseI	17494	ZNF701	'1C5	K562	5.565		1408977	84.1228	82.4896	0		0			0.0498999	0.121598			-1.64543	-0.163822	-1.07592	-0.153062	0.415091	0.45798			-2.17113	2.0329	NaN	-0.464263	-1.40201	NaN	-1.68043	0.572784	0.772092		No
PCRP_PhaseII	23799-24124	ZNF648	'1C5	K562	0.005		23558874	85.9183	17.8866	56		0			0.341407	0.10779			-0.145356	-1.65751	-1.1085	-2.47402	-1.48323	0.870285			0.237185	-1.44492	NaN	-0.355575	0.413695	NaN	1.09279	-0.817244	-1.16725		No
PCRP_PhaseII	23822-24488	ZNF496	'1C5	K562	20.86		21155370	88.4177	41.7818	16		0			-0.20575	-0.0305981			-1.04519	0.063514	-0.516471	0.0692577	0.268035	0.222424			-1.1581	1.41222	NaN	-0.0852327	-0.504119	NaN	-0.728315	-0.212057	0.538154		No
PCRP_PhaseI	18748	HLF	'1C5	HepG2	211.32		8222374	43.3777	76.3184	504		0			-0.0632227	-0.11397			-0.13303	-0.0324253	-0.0645607	-0.138859	-0.0868963	0.052729			-0.41368	0.00918701	0.0976123	0.0399493	0.0224886	NaN	-0.0716009	0.0117461	-0.0221038		No
PCRP_PhaseI	18716	ZNF701	'1C5	K562	5.565		159727	81.8463	87.014	2		0			0.090958	-0.280717			-2.19089	-0.153604	-0.973803	0.179798	0.336755	0.466589			-2.67812	1.98254	NaN	-0.504285	-1.40001	NaN	-1.59097	0.800674	0.798673		No
PCRP_PhaseI	18373	ORC1	'1C4	K562	53.1		863907	55.5266	76.1219	2		0			0.416936	0.293636			-1.30059	-0.133769	-1.07657	-0.442343	0.310224	0.450464			-1.69556	2.03757	NaN	-0.431683	-1.37503	NaN	-1.65448	0.674517	0.575859		No
PCRP_PhaseI	17407	SOX13	'1C4	MCF7	17.985		19621544	86.6395	42.2755	1		0			0.315813	0.109203			0.581348	-0.0603769	-0.0940468	0.202334	0.0174231	0.00288445			0.47504	-0.015767	0.411787	0.0094019	-0.138701	-0.0952525	0.116331	-0.131513	0.0546615		No
PCRP_PhaseII	22618	ZNF202	'1C4	K562	7.555		14418917	87.4663	47.4221	5		0			-0.0588436	0.0251318			-0.45223	-0.448273	-0.410164	-0.534096	-0.09128	0.43452			-0.340361	0.533128	NaN	-0.0533259	-0.0687457	NaN	0.0523871	0.0209273	-0.000847415		No
PCRP_PhaseII	23784-24109	ZNF597	'1C4	K562	0.23		9367059	87.9579	37.2694	4		0			-0.186067	-0.0746287			-1.38636	0.00192986	-0.518703	-0.0188648	0.381042	0.261964			-1.06681	1.35054	NaN	-0.0399094	-0.519875	NaN	-0.616532	-0.317123	0.619131		No
PCRP_PhaseII	22592-23039	SOX12	'1C4	K562	1.57		10654508	87.8514	54.8245	2		0			-0.544176	-0.173693			-1.8604	-0.0582626	-1.01199	-0.218142	0.330695	0.428695			-2.33301	1.99505	NaN	-0.305112	-1.21021	NaN	-1.55852	0.427863	0.627105		No
PCRP_PhaseII	22984-23087	ZBTB5	'1C4	K562	27.615		11560081	84.8626	46.212	22		0			-0.287756	-0.175861			-1.00718	-0.0567776	-0.561993	-0.35335	0.148918	0.324397			-0.874112	1.41048	NaN	-0.215744	-0.438582	NaN	-0.417363	-0.11254	0.382695		No
PCRP_PhaseI	18304	PUM1	'1C3	HepG2	56.35		9738648	59.2705	79.654	3376		0			-0.156194	0.0265225			-0.698793	-0.0766235	-0.433653	-0.410939	-0.18203	0.172882			-0.779227	0.276912	-0.835441	-0.0911086	-0.215024	NaN	-0.883957	0.264766	-0.0291093		No
PCRP_PhaseII	23828	ZNF556	'1C3	K562	0		22375877	81.5579	27.9265	20		0			0.0863937	0.0203169			-0.65104	-1.25503	-1.23393	-1.62464	-1.27129	0.863972			-0.129321	-1.49682	NaN	-0.213196	0.400157	NaN	0.954186	-0.506257	-0.894365		No
PCRP_PhaseI	18743	PUM1	'1C3	HepG2	56.35		5445129	69.4164	69.0261	1661		0			0.029596	0.0121399			-0.257677	-0.0503658	-0.0865666	-0.0126193	-0.303693	0.0995133			-0.198319	0.191588	-0.29996	-0.114097	0.0375037	NaN	-0.550232	0.0811274	-0.0588361		No
PCRP_PhaseI	18970	HMGA1	'1C3	K562	203.84		1137099	83.7093	18.8991	3		0			0.0408039	-0.0415087			-0.689546	-0.312986	-0.751315	NaN	0.0186756	0.488307			1.4056	-0.340411	NaN	-0.567217	-0.399306	NaN	-0.203239	-0.536489	0.737418		No
PCRP_PhaseI	19094-19603	CELF4	'1C3	K562	NaN		2817269	77.0757	71.2379	2		0			-0.440068	-0.202604			-2.14371	-0.104702	-1.15378	-0.174297	0.104588	0.515001			-2.55128	2.17957	NaN	-0.481263	-1.51731	NaN	-1.85133	0.825094	0.378541		No
PCRP_PhaseI	19080-19595	ZFYVE20	'1C3	K562	10.01		9136734	74.9126	55.4789	4		0			-0.521832	-0.221928			-2.03312	-0.00573149	-1.15101	-0.404969	-0.101418	0.499693			-2.55207	2.14231	NaN	-0.370903	-1.33189	NaN	-1.64911	0.811227	0.148909		No
PCRP_PhaseI	18656	HOXB5	'1C3	K562	0.385		305275	85.0899	81.2049	-		0			-0.24691	-0.240557			NaN	NaN	NaN	NaN	NaN	NaN			nan	nan	NaN	nan	nan	NaN	nan	nan	nan		No
PCRP_PhaseI	19167-19553	SLC30A9	'1C3	K562	41.295		14894885	83.1963	55.4144	395		0			-0.145866	-0.350197			-1.48253	-0.026513	-0.73824	-0.0314506	0.309155	0.346051			-1.84683	1.9444	NaN	-0.362887	-1.08766	NaN	-1.29424	0.48908	0.531177		No
PCRP_PhaseI	19163	PAWR	'1C3	K562	0		11575577	73.6854	50.7118	677		0			-0.158963	-0.41883			-1.11935	0.177462	-0.321979	-0.0874574	0.643736	0.0135874			-1.39029	1.70069	NaN	-0.443793	-0.715996	NaN	-0.868732	-0.0957833	0.763529		No
PCRP_PhaseI	19136-19535	SCAND3	'1C2	K562	29.04		23275838	86.4829	42.4137	3339		0			-0.294551	-0.321732			-1.28334	0.0263066	-0.579768	0.223949	0.371717	0.2524			-1.52168	1.66329	NaN	-0.228386	-0.723058	NaN	-0.729555	-0.100492	0.668937		No
PCRP_PhaseI	19044	SMAD2	'1C12	K562	27.32		574785	70.8122	76.1526	1		0			0.634384	0.2568			-1.44966	-0.0388282	-1.00241	-0.335799	0.365478	0.393813			-1.68809	1.84803	NaN	-0.311657	-1.22528	NaN	-2.04454	0.681103	0.745384		No
PCRP_PhaseI	18685	SOX5	'1C12	K562	8.935		4821747	83.8513	88.5197	694		0			-0.226379	0.175553			-1.75414	-0.168792	-0.996074	-0.247798	0.177976	0.494238			-2.2384	2.01447	NaN	-0.460461	-1.34481	NaN	-1.63508	0.803578	0.600294		No
PCRP_PhaseII	24033-24388	ZNF7	'1C12	K562	19.35		13331981	88.1092	51.3343	29		0			0.344068	0.16528			-0.229817	-0.111666	-0.231105	-0.0682257	0.167829	0.162327			-0.254077	1.14213	NaN	-0.185576	-0.31648	NaN	-0.435745	-0.181618	0.274036		No
PCRP_PhaseI	17400	BRD3	'1C12	MCF7	11.555		19059336	83.6546	38.6353	0		0			0.565083	0.142825			1.02162	-0.0473094	-0.0188784	0.206256	-0.049607	-0.0334506			0.917653	-0.0631016	-0.122119	0.0230614	-0.108685	-0.105597	0.0809076	-0.19306	0.0689632		No
PCRP_PhaseI	18683	ZUFSP	'1C12	K562	23.085		5709522	80.3961	87.5846	241		0			-0.200942	0.132186			-1.82756	-0.152655	-1.04675	-0.162643	0.325282	0.473245			-2.34602	2.05771	NaN	-0.449066	-1.40899	NaN	-1.82386	0.69282	0.657068		No
PCRP_PhaseI	17461	ZUFSP	'1C12	K562	23.085		2671367	84.2715	79.7903	0		0			0.0124445	0.113617			-1.75151	-0.182087	-1.2646	-0.324768	0.31065	0.516919			-2.33794	2.10525	NaN	-0.501232	-1.50287	NaN	-1.68374	0.718074	0.64613		No
PCRP_Phase0	17383	BRD3	'1C12	MCF7	11.555		15495667	69.235	56.3715	11		0			0.596911	0.0907705			0.540747	0.0901604	-0.0833972	-0.0470849	-0.0608238	-0.0531319			0.48179	-0.0539517	0.430565	0.14284	-0.00112206	0.0915405	-0.162435	-0.352743	0.00875005		No
PCRP_PhaseII	22973-23081	KLF14	'1C12	K562	0.015		31153696	86.8628	18.7704	0		0			-0.137842	-0.052418			-0.753728	-0.630924	-0.682231	-0.812706	-0.540271	0.624358			-0.244034	-0.658467	NaN	0.0440633	0.255642	NaN	0.498763	-0.869045	-0.303249		No
PCRP_PhaseI	17417-22028	LHX4	'1C11	MCF7	0.98		10490314	82.5149	48.6887	0		0			0.588362	0.210998			0.803854	-0.0550373	0.287041	0.456545	0.127197	-0.0608593			0.705885	-0.0690099	0.450985	-0.0879276	0.174801	-0.0908195	0.28106	-0.445224	0.0859203		No
PCRP_PhaseI	17420-22031	IRX5	'1C11	MCF7	3.77		9260490	82.7353	48.7141	26		0			0.438989	0.195816			0.569696	-0.0545332	0.425231	0.396039	0.0844948	-0.0549403			0.529258	-0.0596913	0.248946	-0.069175	0.295306	0.0842984	0.196716	-0.547424	0.0494866		No
PCRP_PhaseI	17408	ZNF263	'1C11	MCF7	17.14		16311382	87.1957	43.9262	0		0			0.477669	0.167683			0.52075	0.110335	-0.0229683	-0.00545761	0.0491418	-0.0730584			0.41443	-0.10357	0.456762	0.142838	-0.0589032	0.0985015	-0.0426249	-0.241255	0.0795375		No
PCRP_PhaseII	22844-23318	PBX4	'1C11	K562	1.78		7727198	82.051	73.4996	31		0			-0.0962704	-0.030648			-1.48693	-0.0416983	-0.882069	-0.036812	0.363355	0.371153			-1.93723	1.8918	NaN	-0.314753	-1.13288	NaN	-1.42315	0.528684	0.658767		No
PCRP_PhaseII	22620	EIF2S1	'1C11	K562	139.635		37986219	86.2675	18.1617	0		0			-0.38144	-0.097104			-1.56178	-1.40653	-1.83733	-2.22429	-1.53682	0.990291			-0.690562	-2.24563	NaN	-0.0689215	0.49955	NaN	0.88407	-0.786925	-1.08024		No
PCRP_PhaseIII	26305-28253	BOLA3	'1C10	K562	85.09		1550092	35.9228	95.5192	4190		0			0.130673	0.617238			-1.52571	-0.133989	-1.03663	-0.236652	0.32496	0.451242			-2.00712	2.02135	NaN	-0.434146	-1.36953	NaN	-1.83508	0.690561	0.655129		No
PCRP_PhaseI	18982	SIRT3	'1C10	K562	12.96		6359231	62.4058	83.1374	78		0			0.721029	0.434403			-0.717064	-0.192453	-0.901317	-0.0589408	0.122488	0.426107			-1.18283	1.89987	NaN	-0.470405	-1.10917	NaN	-0.952946	0.706305	0.442559		No
PCRP_PhaseI	18387	MLLT10	'1C10	K562	53.12		1506094	32.2302	84.4688	58		0			0.705292	0.390583			-1.31521	-0.140284	-1.2352	-0.324034	0.238683	0.486055			-1.50511	1.97282	NaN	-0.401342	-1.30868	NaN	-1.31906	0.678604	0.57579		No
PCRP_PhaseII	22608-23052	BOLA3	'1C10	K562	85.09		473188	55.2036	89.3225	154		0			0.339554	-0.0578			-1.71854	-0.091725	-1.04433	-0.204184	0.402252	0.429232			-2.00156	2.04999	NaN	-0.469549	-1.40624	NaN	-1.93524	0.708793	0.644021		No
PCRP_PhaseII	22882	BATF	'1C10	K562	0.115		19903175	83.7781	21.4206	9		0			0.00179892	-0.0645249			-0.806242	-0.762693	-0.915906	-0.884187	-0.851437	0.720376			-0.384842	-0.958119	NaN	-0.0602364	0.33863	NaN	0.712587	-0.667969	-0.512117		No
PCRP_PhaseII	22587-23035	USF1	'1C10	K562	32.875		376222	68.2615	87.6322	35		0			0.255393	-0.0807483			-1.45351	-0.0817079	-1.02625	-0.224178	0.3367	0.420702			-2.00693	1.97158	NaN	-0.423008	-1.33336	NaN	-2.01288	0.763167	0.678415		No
PCRP_PhaseI	18997	ZNF496	'1C1	K562	20.86		2460031	58.441	85.6536	24		0			0.253658	0.318493			-1.63347	-0.201755	-1.23233	-0.303506	0.302615	0.516179			-2.22946	2.11826	NaN	-0.438284	-1.49795	NaN	-1.86679	0.764858	0.515415		No
PCRP_PhaseIII	26285	NMI	'1C1	K562	9.505		23052928	86.4813	19.7415	401		0			0.522757	0.201948			1.10368	-1.38057	-0.636569	-1.36536	-2.70277	0.570346			1.05268	-2.51724	NaN	-0.214794	0.328735	NaN	0.676199	-1.06423	-1.87331		No
PCRP_PhaseI	17414	HSF1	'1C1	MCF7	27.31		31160597	86.2361	38.676	32		0			0.512325	0.172454			1.00301	-0.179783	-0.0936638	0.470442	-0.0824483	0.0206021			0.837219	-0.0462976	0.587972	-0.166524	-0.0935751	-0.105527	0.488437	-0.0426845	0.109986		No
PCRP_PhaseIII	28403-28666	HSF1	'1C1	K562	27.005		3005061	83.9897	51.1135	1585		0			-0.413404	-0.0917644			-1.95256	-0.031442	-1.13465	-0.293909	0.22894	0.457238			-2.45948	2.00635	NaN	-0.389892	-1.33616	NaN	-1.77916	0.842237	0.548524		No
PCRP_PhaseI	18297	CPEB3	'1C1	HepG2	0.415		1364207	39.5361	87.6741	245		0			-0.410587	-0.132334			-0.916823	-0.298138	-0.674514	-0.881404	-0.332349	0.309578			-0.977049	0.384584	-0.712278	-0.350286	-0.351427	NaN	-1.48236	0.541185	-0.0318974		No
PCRP_PhaseI	18736	CPEB3	'1C1	HepG2	0.415		8415324	73.5912	66.9002	13		0			-0.147375	-0.140966			-0.170557	0.0165977	-0.137179	-0.476688	0.000319458	0.0337163			-0.246787	0.00330251	-0.145515	-0.0150731	0.0343159	NaN	-0.140563	0.0474013	0.0139035		No
PCRP_PhaseII	23543	IRX2	'1C1	K562	NaN		20527774	90.0813	21.8889	2		0			-0.672731	-0.239245			-1.54402	-0.680792	-1.15485	-1.87657	-0.760253	0.772869			-0.793936	-0.705309	NaN	-0.0131962	0.304464	NaN	0.575454	-0.445009	-0.325824		No
PCRP_PhaseIII	28407-28668	HSF1	'1C1	K562	27.005		5491546	86.5891	47.1932	116		0			-0.764445	-0.296423			-2.13121	-0.115112	-1.30781	-0.613001	0.224339	0.52766			-2.64233	2.05493	NaN	-0.378961	-1.43343	NaN	-2.09089	0.831406	0.561331		No
PCRP_PhaseIII	28399-28664	HSF1	'1C1	K562	27.005		24721504	88.9399	39.8396	1803		0			-1.34894	-0.540539			-2.46984	0.0981415	-1.20969	-0.668602	0.174148	0.437511			-2.61338	1.57532	NaN	-0.0118519	-0.624448	NaN	-0.821997	0.0914347	0.494309		No
PCRP_PhaseII	24039-24390	ZNF324	'1B9	K562	3.015		6953109	89.3468	67.4623	14		0			0.876107	0.428193			-0.194364	-0.049212	-0.331789	0.218919	0.404689	0.0968652			-0.419987	1.40912	NaN	-0.268241	-0.653585	NaN	-0.709846	0.11795	0.624031		No
PCRP_PhaseI	17490	ELK1	'1B9	K562	17.195		1312028	81.2719	83.5722	0		0			-0.0732241	0.155789			-1.63948	-0.221003	-1.27942	0.0318601	0.306605	0.522823			-2.12566	2.03151	NaN	-0.516293	-1.4336	NaN	-1.42371	0.813952	0.660535		No
PCRP_PhaseII	23512-23883	GTF2H2	'1B9	K562	25.165		20962048	84.6161	16.9023	0		0			-0.217972	-0.0434449			-1.0135	-0.655158	-0.848904	-0.434651	-0.407204	0.660015			-0.53823	-0.786742	NaN	-0.0139581	0.306098	NaN	0.525809	-0.846062	-0.200913		No
PCRP_PhaseII	23821	TARBP2	'1B9	K562	29.47		14890455	87.7939	32.3641	7		0			-0.167679	-0.0595631			-0.869593	-1.04723	-1.15514	-1.69088	-0.922491	0.820571			-0.363383	-0.480378	NaN	-0.0773667	0.287147	NaN	0.336222	-0.180991	-0.646801		No
PCRP_PhaseII	22855-23323	MAP3K7	'1B9	K562	32.915		16946408	80.9962	44.2771	48		0			-0.27243	-0.136108			-1.26521	0.0469616	-0.587119	-0.307907	0.275389	0.273317			-1.32112	1.40529	NaN	-0.0708012	-0.475145	NaN	-0.62567	-0.323221	0.545261		No
PCRP_PhaseI	18712	ELK1	'1B9	K562	17.195		140149	67.8007	89.4464	-		0			-0.17264	-0.138776			NaN	NaN	NaN	NaN	NaN	NaN			nan	nan	NaN	nan	nan	NaN	nan	nan	nan		No
PCRP_PhaseII	22957-23074	TFAP2C	'1B9	K562	0.01		2532349	79.8838	71.0221	5		0			-0.0309076	-0.142315			-1.7133	-0.0356818	-0.927912	-0.113882	0.389089	0.385007			-2.14189	1.95532	NaN	-0.261181	-1.23172	NaN	-1.64628	0.384044	0.709233		No
PCRP_PhaseI	18414	NCOA3	'1B9	MCF7	271.215		21199566	68.5752	52.9051	81		0			0.005114	-0.179224			0.302895	0.0495786	0.0351892	-0.135139	-0.104076	-0.0298889			0.253826	-0.0261707	0.532941	0.0748629	0.0127174	-0.113751	-0.044029	-0.227701	0.0134378		No
PCRP_PhaseI	18977	MED7	'1B8	K562	NaN		2373215	61.5733	86.88	15		0			0.737041	0.447413			-1.37152	-0.152748	-1.02071	-0.212577	0.290155	0.453667			-1.93461	2.04392	NaN	-0.436215	-1.39066	NaN	-1.55881	0.639381	0.63595		No
PCRP_PhaseI	18718	USF1	'1B8	K562	32.875		1234592	85.0257	88.2558	84		0			0.525853	0.270487			-1.36321	-0.212566	-0.986834	-0.203498	0.291405	0.471783			-2.13694	2.05583	NaN	-0.528624	-1.32652	NaN	-1.86536	0.616991	0.673766		No
PCRP_PhaseII	23579-23932	LEUTX	'1B8	K562	0		23171466	79.448	24.6636	55		0			0.120614	0.0258675			-0.423534	-1.11941	-0.736487	-1.20915	-1.4908	0.769117			0.158726	-0.668068	NaN	-0.220584	0.317378	NaN	0.780418	-0.561992	-0.963796		No
PCRP_PhaseI	18620	JAZF1	'1B8	K562	0.055		4854268	85.8665	77.2986	4		0			-0.399504	-0.0875641			-1.78746	-0.0911102	-0.989049	-0.162769	0.341114	0.433666			-2.21211	1.97988	NaN	-0.421431	-1.19994	NaN	-1.51016	0.599149	0.628376		No
PCRP_PhaseII	22594-23041	JAZF1	'1B8	K562	0.055		6113085	82.6588	58.6193	15		0			-0.450606	-0.114017			-1.76295	-0.0810162	-0.971811	-0.11151	0.396152	0.414262			-2.12623	1.99061	NaN	-0.318718	-1.25771	NaN	-1.67547	0.433676	0.682442		No
PCRP_PhaseII	22224	NR5A2	'1B8	K562	0.04		20483666	87.7086	15.8576	0		0			-0.35267	-0.151832			-1.27122	-0.850526	-1.19084	-1.21395	-0.666199	0.791155			-0.751096	-1.01906	NaN	-0.0669272	0.362467	NaN	0.715352	-0.786295	-0.295897		No
PCRP_PhaseIII	28435-28684	USF1	'1B8	Breast	unknown		1044098	36.8418	77.2202	5428		0			0.0878398	-0.202081			0.74229	0.220421	0.577749	0.419125	0.320243	0.0844083			0.780685	0.050077	0.734205	0.173089	0.480971	-0.0129376	0.534818	0.127123	0.213725		No
PCRP_PhaseI	19012	ZBTB16	'1B7	K562	0.2		716925	50.8295	88.8252	11		0			0.286109	0.36247			-1.75913	-0.170288	-1.13059	0.0017251	0.308983	0.489108			-2.27865	2.04034	NaN	-0.42069	-1.43706	NaN	-1.51355	0.763051	0.626674		No
PCRP_PhaseI	18289	PAX5	'1B7	HepG2	0		241696	38.1185	88.4616	1		0			0.322821	0.160381			-1.11371	-0.223159	-0.554417	-1.14191	-0.307454	0.280893			-0.901197	0.346055	-1.09538	-0.254923	-0.300554	NaN	-1.44448	0.419633	0.000821698		No
PCRP_PhaseI	18728	PAX5	'1B7	HepG2	0		3055198	68.0068	66.9134	601		0			-0.290185	0.0206521			-0.858533	-0.2266	-0.397395	-0.0116756	-0.349777	0.251054			-1.11551	0.2864	-0.803913	-0.174904	-0.129879	NaN	-0.851429	0.273859	-0.0152518		No
PCRP_PhaseII	22187-22781	ZNF8	'1B7	K562	3.67		8156757	78.3492	50.6807	25		0			-0.11248	-0.0436462			-1.17098	0.0400223	-0.613836	-0.080617	0.396466	0.247507			-1.46966	1.57423	NaN	-0.117337	-0.745956	NaN	-1.01482	0.0403445	0.707641		No
PCRP_PhaseII	22596-23043	LHX5	'1B7	K562	NaN		5232944	81.648	60.517	1		0			-0.0273679	-0.0522323			-1.495	-0.0842313	-0.887096	-0.312061	0.363393	0.397732			-1.79284	1.94547	NaN	-0.32304	-1.16833	NaN	-1.76672	0.438625	0.645763		No
PCRP_PhaseII	22965-23079	FOXO3	'1B7	K562	NaN		27572978	89.213	18.1869	62		0			-0.181514	-0.151701			-0.749549	-0.695269	-0.710656	-0.890856	-0.831874	0.668011			-0.10353	-0.531095	NaN	0.00541889	0.26869	NaN	0.535375	-0.957953	-0.506198		No
PCRP_PhaseII	22590	ZNF503	'1B7	K562	0		14474222	88.8023	36.5709	0		0			-0.616868	-0.189978			-1.38239	-0.434479	-1.08611	-0.910484	-0.132755	0.631299			-0.879167	0.420464	NaN	-0.0961815	0.00780412	NaN	0.177126	-0.156124	0.250722		No
PCRP_PhaseI	19091-19601	IRX2	'1B7	K562	NaN		19207117	78.9121	46.979	11		0			-0.3762	-0.25285			-1.55031	0.140139	-0.78514	-0.334396	-0.0500831	0.337417			-1.81453	1.85926	NaN	-0.166067	-0.772387	NaN	-0.867184	0.237947	0.11917		No
PCRP_PhaseI	17418-22029	ZNF354A	'1B6	MCF7	12.615		12015063	81.9308	45.3746	2		0			0.662981	0.225701			0.78764	0.0294263	0.323847	0.453199	0.236458	-0.111284			0.720825	-0.177837	1.07084	0.037137	0.243221	0.125675	0.241948	-0.638822	0.13648		No
PCRP_PhaseII	23560-23920	HMGA1	'1B6	K562	203.84		4774286	85.9913	56.1412	10		0			-0.00451811	0.0449898			-1.01033	-0.118893	-0.563573	-0.119616	0.436066	0.296573			-1.07521	1.70288	NaN	-0.302951	-0.803423	NaN	-1.39676	0.0773407	0.673176		No
PCRP_PhaseII	22598-23044	LHX4	'1B6	K562	0.01		917963	74.7542	86.66	175		0			-0.312911	-0.00678323			-1.88894	-0.153758	-1.158	-0.355266	0.307139	0.498478			-2.48971	2.04679	NaN	-0.452975	-1.47611	NaN	-2.12972	0.890059	0.627568		No
PCRP_PhaseII	23778-24103	GRHL1	'1B6	K562	3.875		19661809	89.2221	16.1172	0		0			-0.00288879	-0.00880438			-0.624321	-0.595081	-0.670684	-0.136383	-0.322314	0.57192			-0.242724	-0.460487	NaN	-0.0488914	0.231078	NaN	0.556095	-0.886634	-0.135755		No
PCRP_PhaseII	23583-23935	FOXC2	'1B6	K562	NaN		5014493	80.6475	65.69	7		0			-0.213334	-0.0540478			-1.58702	-0.0926593	-0.877489	-0.200402	0.342515	0.406503			-1.85812	1.9088	NaN	-0.395036	-1.06553	NaN	-1.23638	0.550413	0.571014		No
PCRP_PhaseII	23820-24487	ZNF488	'1B6	K562	0.04		25945893	89.0695	32.047	0		0			-0.404097	-0.129932			-1.10188	-0.156697	-0.635687	-0.118525	0.0787107	0.400308			-0.931792	0.665389	NaN	0.000807069	-0.0414777	NaN	-0.0189631	-0.779544	0.335231		No
PCRP_PhaseI	18450	TERF2IP	'1B6	MCF7	55.565		7802509	62.1642	68.0207	70		0			-0.274559	-0.222462			-0.143386	-0.102061	0.157708	-0.23117	-0.101556	0.0409348			-0.0182443	0.122107	0.0307509	-0.113153	0.0760543	-0.110859	-0.373639	0.0407803	-0.146321		No
PCRP_PhaseI	19141-19539	USP7	'1B6	K562	31.745		16439875	85.3888	47.4159	4318		0			-0.423553	-0.485554			-1.5161	0.0355063	-0.767221	0.0288473	0.424973	0.298403			-1.84356	1.91583	NaN	-0.304343	-1.10374	NaN	-1.43023	0.394451	0.631302		No
PCRP_PhaseI	19034	HMG20B	'1B5	K562	31.365		2301016	79.553	73.8356	1		0			0.127068	0.171761			-1.60475	-0.20024	-1.076	-0.232224	0.30843	0.490771			-2.08682	2.05548	NaN	-0.434625	-1.38233	NaN	-1.66893	0.597345	0.652994		No
PCRP_PhaseI	19063	CARM1	'1B4	K562	26.275		817159	81.2477	74.0197	0		0			0.680898	0.526647			-0.976408	-0.151912	-0.9227	0.182539	0.434014	0.375298			-1.58783	1.89429	NaN	-0.406083	-1.22543	NaN	-1.24631	0.629354	0.706991		No
PCRP_PhaseI	17458	FOXL2	'1B4	K562	2.21		1922031	76.7472	80.5457	3		0			0.46542	0.503287			-1.40148	-0.19622	-1.09328	-0.236015	0.356977	0.472917			-1.79755	2.02173	NaN	-0.428019	-1.44969	NaN	-1.74018	0.638065	0.728385		No
PCRP_PhaseI	18983	OBFC1	'1B4	K562	NaN		3433952	68.4803	92.958	1455		0			0.218	0.386601			-1.43517	-0.162633	-1.09714	-0.0855402	0.312918	0.466511			-2.02783	2.01942	NaN	-0.471008	-1.42367	NaN	-1.5357	0.838058	0.619111		No
PCRP_PhaseI	18680	FOXL2	'1B4	K562	2.21		6105146	84.6849	87.4299	80		0			0.219327	0.255904			-1.50033	-0.138181	-0.914359	-0.0167352	0.316473	0.429121			-2.00458	1.94181	NaN	-0.4175	-1.25317	NaN	-1.42755	0.745886	0.636744		No
PCRP_PhaseII	23523-23894	NPM1	'1B4	K562	NaN		22493484	80.5593	20.6575	0		0			0.0747536	0.115733			-0.750693	-0.909122	-1.09934	-0.545204	-0.808638	0.764571			-0.261539	-1.53752	NaN	0.0335431	0.351775	NaN	0.781255	-0.678373	-0.689143		No
PCRP_PhaseII	23848-24497	GTF2IRD2	'1B4	K562	6.395		13768982	85.9319	34.898	35		0			-0.0815515	0.0154335			-0.835969	-0.0934414	-0.376261	-0.196929	0.012496	0.299651			-0.632589	0.985276	NaN	-0.0618029	-0.187139	NaN	-0.036098	-0.596119	0.277776		No
PCRP_PhaseII	22948	ATF2	'1B4	K562	68.935		16135516	82.1188	33.6715	120		0			0.33101	0.00967692			0.52882	-1.15484	-0.897465	-1.51033	-1.06089	0.654602			0.617584	-0.623286	NaN	-0.356052	0.192591	NaN	0.737513	-0.183477	-0.767849		No
PCRP_PhaseII	22846	RAX	'1B4	K562	0		18778054	84.5654	23.0567	42		0			-0.158866	-0.10765			-1.06852	-0.821927	-1.00435	-1.14175	-0.832785	0.762941			-0.428807	-0.441464	NaN	-0.00313739	0.271396	NaN	0.717241	-0.428382	-0.722447		No
PCRP_PhaseI	18395	YEATS2	'1B3	K562	22.055		15307410	63.5495	63.2507	235		0			0.855693	0.566525			0.574774	-0.472698	-0.376645	0.662921	-0.329121	0.25881			0.407294	0.759741	NaN	-0.278088	-0.216609	NaN	0.594781	-0.215947	-0.0835128		No
PCRP_PhaseI	17433-22041	SOX2	'1B3	MCF7	11.21		1864037	47.5473	71.9438	0		0			0.510538	0.264961			0.487944	-0.271119	0.04495	0.247208	0.129767	0.0767948			0.505649	0.186447	-0.713263	-0.342024	-0.0647796	-0.120767	0.0237023	-0.417921	0.00301371		No
PCRP_PhaseI	17457	EZH2	'1B3	K562	106.68		866197	77.7923	79.6985	-		0			0.261558	0.261682			NaN	NaN	NaN	NaN	NaN	NaN			nan	nan	NaN	nan	nan	NaN	nan	nan	nan		No
PCRP_PhaseI	17464	ZBTB5	'1B3	K562	27.615		1415983	83.855	78.1943	3		0			0.0675252	0.204193			-1.80082	-0.21416	-1.16768	-0.146517	0.24676	0.525954			-2.35307	2.15318	NaN	-0.54771	-1.4923	NaN	-1.87378	0.686982	0.583855		No
PCRP_PhaseI	18679	EZH2	'1B3	K562	106.68		1002222	84.9915	89.1677	27		0			0.140293	0.144288			-1.82225	-0.174181	-0.997678	-0.0225999	0.449728	0.449208			-2.11992	1.98242	NaN	-0.395783	-1.34859	NaN	-1.88948	0.790863	0.634051		No
PCRP_PhaseI	18291	PAX3	'1B3	HepG2	0.015		435444	40.1509	87.3071	-		0			-0.0710241	0.111689			NaN	NaN	NaN	NaN	NaN	NaN			nan	nan	nan	nan	nan	NaN	nan	nan	nan		No
PCRP_PhaseII	23823-24489	ZNF570	'1B3	K562	0.305		2186856	87.7067	76.603	-		0			-0.390907	0.102065			NaN	NaN	NaN	NaN	NaN	NaN			nan	nan	NaN	nan	nan	NaN	nan	nan	nan		No
PCRP_PhaseI	18625	GCM2	'1B3	K562	0.01		5065760	87.3247	80.5862	4		0			-0.0155405	0.0529631			-1.52451	-0.105128	-0.958248	-0.128303	0.312965	0.426345			-1.95308	1.99544	NaN	-0.364033	-1.30101	NaN	-1.49096	0.597482	0.622465		No
PCRP_PhaseI	18686	ZBTB5	'1B3	K562	27.615		12823296	85.8161	86.6272	1243		0			-0.380766	0.0379715			-1.78539	-0.139628	-1.00766	-0.20493	0.293981	0.466197			-2.2806	2.00412	NaN	-0.438692	-1.30791	NaN	-1.58201	0.723538	0.63016		No
PCRP_PhaseII	23858-24502	ZNF334	'1B3	K562	0.035		38268026	88.6558	20.7493	2		0			-0.0736688	-0.0458499			-0.728397	-0.76092	-0.77769	-0.954024	-0.884734	0.696784			-0.275286	-1.01124	NaN	-0.0188815	0.340231	NaN	0.581255	-0.931198	-0.462321		No
PCRP_PhaseI	18730	PAX3	'1B3	HepG2	0.015		3175344	71.7813	65.5504	582		0			-0.277681	-0.0910003			-0.816822	-0.130083	-0.417499	-0.435628	-0.236957	0.206516			-1.13922	0.297208	-0.578165	-0.170772	-0.184329	NaN	-0.910772	0.199585	0.00665535		No
PCRP_PhaseII	23497-23868	HMGXB4	'1B3	K562	15.42		11435964	86.586	32.9661	12		0			-0.222437	-0.099936			-0.996736	-0.189648	-0.620697	0.165485	0.00337416	0.407931			-0.675273	1.11722	NaN	-0.120118	-0.122894	NaN	-0.405954	-0.764295	0.0981859		No
PCRP_PhaseI	19138-19537	ANKHD1	'1B3	K562	87.085		26117579	84.0295	43.1998	10614		0			0.269597	-0.128023			-0.450962	0.012036	-0.390396	0.278482	0.360633	0.12676			-0.630372	1.53356	NaN	-0.222038	-0.664366	NaN	-0.56544	-0.107835	0.555246		No
PCRP_PhaseI	18996	ZSCAN21	'1B2	K562	7.015		2804482	52.0715	87.6287	49		0			0.583584	0.381815			-1.54009	-0.157894	-1.08189	-0.157969	0.26504	0.477274			-1.98992	2.08455	NaN	-0.451911	-1.4485	NaN	-1.61516	0.749291	0.535115		No
PCRP_PhaseII	23535-23906	RCOR3	'1B2	K562	29.91		21685061	75.2238	27.8101	159		0			0.754469	0.377405			0.838394	-1.06019	-0.330885	-0.48512	-1.31162	0.461333			1.13103	-1.28406	NaN	-0.181048	0.166216	NaN	0.653803	-0.821466	-1.24327		No
PCRP_PhaseI	18368	KDM1A	'1B2	K562	149.18		2060449	39.7673	82.0788	45		0			0.643687	0.263961			-1.37535	-0.131534	-0.945063	-0.164754	0.288765	0.432173			-1.84957	1.98703	NaN	-0.38734	-1.26395	NaN	-1.81205	0.566197	0.646784		No
PCRP_PhaseI	19070	ZBTB18	'1B2	K562	1.59		8141765	72.5767	73.2373	21		0			0.507567	0.2553			-0.695971	-0.120574	-0.669018	-0.157615	0.258092	0.327537			-1.04113	1.70153	NaN	-0.331549	-0.894281	NaN	-0.829702	0.494234	0.550565		No
PCRP_PhaseI	19036	NR5A2	'1B2	K562	0.04		3053656	79.0375	74.2618	4		0			0.219684	0.182161			-1.47061	-0.152191	-1.02987	-0.24127	0.279674	0.462661			-1.95568	2.06633	NaN	-0.482166	-1.31302	NaN	-1.8382	0.578724	0.598441		No
PCRP_PhaseII	23805-24130	ZHX2	'1B2	K562	0		5012021	81.821	61.0383	12		0			0.0853432	0.139345			-1.16832	-0.0552834	-0.654847	0.0117676	0.500637	0.282213			-1.38881	1.62733	NaN	-0.125488	-0.794216	NaN	-0.894844	-0.0864328	0.724703		No
PCRP_PhaseI	17444-22052	FOXP3	'1B2	MCF7	0.21		3510738	79.5683	48.0052	0		0			0.368901	0.11665			0.129545	-0.262598	0.0624661	0.189419	-0.0343833	0.0981688			0.126499	0.22097	-0.359283	-0.279058	-0.0747626	0.0888233	-0.199059	-0.234044	-0.0674243		No
PCRP_PhaseI	18933	NR5A2	'1B2	K562	0.04		128786	78.097	25.4315	3		0			0.433133	0.0883052			-0.311034	-1.93447	-1.3728	NaN	NaN	0.99235			1.97264	1.07463	NaN	-1.47411	-1.09975	NaN	1.2118	0.878549	NaN		No
PCRP_PhaseII	23812-24137	HMGN1	'1B2	K562	239.5		20980109	87.0971	14.4461	0		0			0.0567405	0.0860106			-0.556341	-0.590679	-0.575224	-0.333237	-0.458173	0.56296			-0.38677	-1.11427	NaN	0.0135901	0.301568	NaN	0.665813	-0.626374	-0.333663		No
PCRP_PhaseIII	28436-28685	YY1	'1B2	Breast	unknown		4055602	26.8974	83.4334	517		0			0.360557	0.0730315			0.707844	0.272291	0.566496	0.574992	0.54403	0.0645216			0.735983	0.0751715	-0.0744299	0.314836	0.422174	0.0454256	0.554417	-0.352362	0.337915		No
PCRP_Phase0	17358	YY1	'1B2	K562	27.435		24783129	86.1935	34.7688	41		0			0.329068	-0.0188332			0.362211	-1.47721	-1.30394	-1.46349	-1.29324	0.793482			0.510593	-1.04569	NaN	-0.353411	0.283215	NaN	0.711007	-0.254939	-0.842325		No
PCRP_Phase0	17372	YY1	'1B2	HepG2	15.97		15445333	79.3538	51.8307	973		0			0.325763	-0.0507762			1.34578	0.192169	0.310713	-0.987274	0.0988228	-0.461265			1.47758	-0.602452	1.45547	0.339083	0.0300577	NaN	0.810917	-0.477389	-0.260251		No
PCRP_PhaseII	23558	IRF2	'1B2	K562	8.215		22723666	88.6383	20.2829	0		0			-0.601328	-0.191014			-1.67135	-1.29479	-1.64001	-1.44201	-1.1573	0.949149			-0.787077	-1.52477	NaN	0.00441346	0.427292	NaN	0.823196	-0.636318	-0.854892		No
PCRP_PhaseI	19131	HDAC10	'1B2	K562	NaN		14553330	81.2834	40.4773	668		0			-0.0019836	-0.251653			-0.735658	0.0341356	-0.294926	0.0592755	0.682344	0.0439641			-0.966901	1.45701	NaN	-0.4431	-0.592733	NaN	-0.395009	-0.086989	0.819409		No
PCRP_PhaseI	19093	POGZ	'1B2	K562	NaN		15920283	75.3079	52.8261	20		0			-0.733847	-0.416748			-1.81999	0.00503473	-1.20261	-1.07608	-0.534456	0.547777			-1.86827	1.60295	NaN	-0.207721	-0.45826	NaN	-0.341532	0.664424	-0.423398		No
PCRP_PhaseI	17405	SMAD1	'1B12	MCF7	13.495		28182379	84.4356	34.7672	101		0			0.592661	0.228133			1.07067	-0.0801791	-0.0945532	0.286811	-0.10924	-0.0173746			0.925757	-0.116495	0.980124	-0.0174532	-0.0820403	-0.0764731	0.339748	-0.217228	0.137428		No
PCRP_PhaseIII	26428	ZBTB14	'1B12	K562	NaN		28393059	88.9293	18.5104	9		0			0.146647	0.144796			-0.370088	-1.25255	-0.948154	-1.23628	-1.56474	0.817958			0.338261	-2.33162	NaN	-0.0928786	0.391429	NaN	0.948256	-0.883303	-1.28691		No
PCRP_PhaseI	18444	NR1D2	'1B12	MCF7	11.625		872526	81.8386	64.567	0		0			0.00627879	0.00381478			-0.350307	-0.410349	-0.547239	-0.495769	-0.462202	0.231254			-0.468109	0.382688	NaN	-0.356849	-0.543098	0.166003	-0.762227	0.226419	-0.228898		No
PCRP_PhaseII	22191-22783	TRIM24	'1B12	K562	43.095		24723689	86.7144	20.3183	2		0			-0.150114	-0.060577			-1.10556	-0.785246	-1.04534	-0.746458	-0.747838	0.753253			-0.411699	-0.863381	NaN	0.0297611	0.322666	NaN	0.659904	-1.10986	-0.396397		No
PCRP_PhaseII	23559	RFX6	'1B12	K562	0		24985648	88.2689	16.978	0		0			-0.526296	-0.172931			-2.06464	-1.65951	-2.0288	-3.30923	-1.63104	1.04816			-0.583488	-2.37977	NaN	-0.166815	0.505976	NaN	1.10066	-0.568198	-1.36468		No
PCRP_PhaseI	19057	HES1	'1B11	K562	4.19		6531967	80.3582	71.6915	10		0			0.351786	0.251788			-0.884929	-0.14716	-0.753034	0.239499	0.174941	0.379304			-1.22899	1.78166	NaN	-0.317212	-0.965493	NaN	-0.999889	0.489983	0.542448		No
PCRP_PhaseI	18954	HES1	'1B11	K562	4.19		271271	80.3634	22.937	3		0			0.543001	0.216822			-0.726071	-0.764549	-0.202878	NaN	NaN	0.69279			1.5576	0.0746266	NaN	0.110855	-0.29239	NaN	0.796761	-0.536489	NaN		No
PCRP_PhaseII	22178-22776	GLIS3	'1B11	K562	NaN		23540238	86.0156	22.2128	8		0			-0.325339	-0.0611033			-1.18732	-0.851406	-0.778773	-1.15063	-0.49928	0.720922			-0.427709	-0.770852	NaN	0.0171456	0.307802	NaN	0.5427	-1.06393	-0.277524		No
PCRP_PhaseII	22872	DMRT2	'1B11	K562	0		18777499	86.4495	22.161	1		0			-0.173257	-0.133825			-0.918545	-0.812343	-1.08934	-1.60067	-0.832281	0.765222			-0.267219	-0.746009	NaN	-0.138824	0.305741	NaN	0.758373	-0.527049	-0.470317		No
PCRP_PhaseI	19117	TBX4	'1B11	K562	NaN		3889174	62.1307	67.1764	12		0			-0.75812	-0.36165			-2.33344	-0.162145	-1.34337	-1.55476	-0.254848	0.625019			-2.90154	2.24982	NaN	-0.635249	-1.55022	NaN	-2.26645	1.21621	-0.11523		No
PCRP_PhaseI	18392	ZNF232	'1B10	K562	4.56		1985484	38.9091	81.103	82		0			0.829863	0.384505			-1.41136	-0.172129	-0.901838	0.084413	0.260107	0.443718			-1.64217	2.00025	NaN	-0.449728	-1.27835	NaN	-1.37232	0.556278	0.633292		No
PCRP_PhaseII	23817-24485	DVL3	'1B10	K562	13.98		1098437	88.0735	80.8287	0		0			-0.0881289	0.130744			-1.88119	-0.105275	-1.10256	-0.294493	0.349123	0.462091			-2.52455	2.01757	NaN	-0.420232	-1.36234	NaN	-2.03622	0.800459	0.628736		No
PCRP_PhaseI	17460	ESRRA	'1B10	K562	18.36		2159974	80.2876	80.13	6		0			0.0940406	0.0848983			-1.86659	-0.20168	-1.20428	-0.106398	0.279718	0.522695			-2.41828	2.09865	NaN	-0.470159	-1.48438	NaN	-1.7422	0.795315	0.571976		No
PCRP_PhaseII	23846	GTF2I	'1B10	K562	41.925		24101443	84.7281	16.9892	4		0			-0.0197307	0.0512164			-1.18886	-1.67704	-1.26302	-1.33804	-1.74614	0.964686			-0.0708691	-2.69135	NaN	-0.220493	0.494759	NaN	1.09687	-0.758145	-1.50201		No
PCRP_PhaseI	18682	ESRRA	'1B10	K562	18.36		1849127	82.9902	88.3976	46		0			-0.435261	0.0484449			-1.72622	-0.166494	-0.974662	-0.138312	0.363732	0.45625			-2.36941	2.04958	NaN	-0.484059	-1.36129	NaN	-1.87328	0.664483	0.681865		No
PCRP_PhaseI	18447	ZBTB25	'1B10	MCF7	7.28		3886236	82.4619	62.1035	2		0			-0.051441	-0.152611			-0.217062	-0.381086	-0.0830369	-0.238908	-0.301858	0.173874			-0.300937	0.326648	-1.81829	-0.378879	-0.151643	0.0221346	-0.502787	0.109483	-0.222102		No
PCRP_PhaseII	22940-23065	MIS18BP1	'1B10	K562	13.905		6105452	88.8832	51.4356	6		0			-0.352838	-0.191074			-1.45026	0.0678224	-0.699263	-0.319107	0.206429	0.31217			-1.69051	1.78152	NaN	-0.181664	-0.806135	NaN	-1.29032	0.183785	0.462645		No
PCRP_PhaseII	24061-24402	SCRT1	'1B1	K562	0.01		6374173	83.9221	71.2962	26		0			0.822213	0.42214			-0.188804	-0.126736	-0.327866	0.191399	0.322981	0.156103			-0.416196	1.4691	NaN	-0.305344	-0.686682	NaN	-0.690922	0.248648	0.546316		No
PCRP_PhaseI	18363	CREB3L1	'1B1	K562	1.325		3334016	43.8822	78.8994	68		0			0.596173	0.271462			-1.38388	-0.154356	-0.966113	0.0186045	0.270079	0.445169			-1.63452	1.96346	NaN	-0.381471	-1.23297	NaN	-1.26448	0.543541	0.608976		No
PCRP_PhaseII	22852-23322	FEZF2	'1B1	K562	0		1202540	81.4291	92.8184	1047		0			-0.0995305	0.182849			-1.76575	-0.0753402	-1.14215	-0.423937	0.261453	0.466939			-2.32027	1.99051	NaN	-0.452504	-1.43092	NaN	-1.93188	1.07008	0.529588		No
PCRP_PhaseI	18619	RELB	'1B1	K562	0.185		4672113	85.2257	79.0849	3		0			-0.438289	0.0148819			-1.91251	-0.10078	-0.929569	-0.129688	0.337362	0.433486			-2.33449	2.01299	NaN	-0.39423	-1.26036	NaN	-1.50365	0.511626	0.665552		No
PCRP_PhaseII	22878-23329	PAX5	'1B1	K562	0		8453378	85.4691	63.1077	8		0			0.195424	-0.00091182			-0.963632	0.0365284	-0.593981	-0.080787	0.398705	0.226929			-1.20267	1.61732	NaN	-0.197601	-0.792881	NaN	-1.00673	0.247088	0.630187		No
PCRP_PhaseI	19115	JUP	'1B1	K562	NaN		3077533	66.8144	62.2916	4		0			-0.59977	-0.265351			-2.27539	-0.130644	-1.57466	-0.624589	-0.308433	0.632151			-2.69737	2.30777	NaN	-0.572498	-1.79372	NaN	-1.75519	1.17834	-0.130039		No
PCRP_PhaseI	19017	ZSCAN12	'1A9	K562	10.095		770770	53.06	87.0952	-		0			0.397577	0.259015			NaN	NaN	NaN	NaN	NaN	NaN			nan	nan	NaN	nan	nan	NaN	nan	nan	nan		No
PCRP_PhaseI	17429	MYCN	'1A9	MCF7	0.37		15425297	87.2003	42.5254	0		0			0.475963	0.153331			0.50543	0.0957776	0.103452	0.0115513	-0.0134074	-0.0744759			0.378441	-0.152086	0.643991	0.171037	0.0629411	-0.0716352	0.0955543	-0.288574	0.0788285		No
PCRP_PhaseI	17419-22030	ISL1	'1A9	MCF7	1.09		10434352	81.7924	47.0163	4		0			0.636073	0.153138			0.81666	-0.0714046	0.239322	0.249885	0.15107	-0.0425811			0.715883	-0.0357973	0.294708	-0.106536	0.156126	0.077535	0.0967682	-0.522103	0.0816711		No
PCRP_PhaseII	23782-24107	CHEK2	'1A9	K562	30.755		18036554	89.2525	18.3656	0		0			-0.00229743	0.0899808			-0.529311	-0.453318	-0.522976	0.0228244	-0.414796	0.497023			-0.22011	-0.106853	NaN	-0.0318553	0.194949	NaN	0.455147	-1.07974	-0.169579		No
PCRP_PhaseII	23508-23879	SIN3B	'1A9	K562	NaN		7141721	87.0921	52.0539	23		0			0.29425	0.0550954			-0.548231	0.119039	-0.310368	0.00947106	0.20238	0.0908425			-0.542487	1.42454	NaN	0.0157568	-0.624726	NaN	-0.716146	-0.268709	0.454583		No
PCRP_PhaseII	22875	MED1	'1A9	K562	27.75		24122149	81.9139	21.7459	28		0			0.327879	0.0379041			-0.349088	-1.41667	-1.52855	-1.5959	-1.46382	0.896071			0.124389	-1.07875	NaN	-0.208302	0.379297	NaN	0.708338	-0.580243	-1.0962		No
PCRP_PhaseII	22214-22801	ETV6	'1A9	K562	2.165		11747524	83.3263	42.2016	78		0			0.00903744	-0.109067			-0.752938	-0.0840392	-0.586901	-0.321497	0.185403	0.313746			-0.725153	1.41287	NaN	-0.135336	-0.473038	NaN	-0.579106	-0.158996	0.353678		No
PCRP_Phase0	18112	TP73	'1A8	MCF7	1.345		5352417	83.6702	76.9929	10		0			0.903668	0.609669			0.883162	-0.369598	0.185132	0.534809	-0.0994111	0.07157			0.847785	0.147546	0.363314	-0.405961	-0.0408924	-0.062806	0.305447	0.0733094	-0.0959076		No
PCRP_PhaseI	19064	NACC1	'1A8	K562	23.535		458386	81.0199	72.9849	-		0			0.498903	0.577071			NaN	NaN	NaN	NaN	NaN	NaN			nan	nan	NaN	nan	nan	NaN	nan	nan	nan		No
PCRP_PhaseI	18956	MAFF	'1A8	K562	2.65		215199	81.1551	22.3679	3		0			0.887583	0.439312			-1.15903	-0.197508	-0.635838	NaN	-0.0357722	0.466281			0.802717	1.22663	NaN	-0.322104	-0.532705	NaN	NaN	0.0305517	0.0820662		No
PCRP_PhaseI	19059	MAFF	'1A8	K562	2.65		4983372	81.1572	72.032	14		0			0.612739	0.3808			-0.712168	-0.0878748	-0.824629	0.076068	0.369921	0.319299			-1.08903	1.74003	NaN	-0.329717	-0.937041	NaN	-0.901828	0.383552	0.622646		No
PCRP_PhaseI	19048	SIRT2	'1A8	K562	19.445		2716739	77.0362	72.5824	1		0			0.357139	0.251528			-1.28083	-0.165839	-0.989806	-0.0810346	0.341488	0.437392			-1.74634	1.97842	NaN	-0.397929	-1.30525	NaN	-1.37604	0.547517	0.690449		No
PCRP_PhaseII	23803-24128	SHOX	'1A8	K562	0		23647927	85.0701	16.91	23		0			0.322789	0.193023			-0.329832	-1.62662	-1.36234	-1.53938	-1.87052	0.917796			0.337521	-1.98273	NaN	-0.314231	0.413094	NaN	1.17237	-0.736968	-1.37122		No
PCRP_PhaseI	19054	SHARPIN	'1A8	K562	15.26		7054088	80.4351	72.8424	11		0			0.248483	0.159929			-0.943824	-0.0673192	-0.792349	-0.121885	0.267348	0.348238			-1.26126	1.73384	NaN	-0.323497	-0.963225	NaN	-0.93392	0.581028	0.583738		No
PCRP_PhaseI	17480	YBX1	'1A8	K562	375.895		2047677	77.2149	83.4978	14		0			0.169416	0.0694263			-1.73473	-0.188785	-1.08818	-0.267018	0.371314	0.483892			-2.30038	2.03682	NaN	-0.419929	-1.41668	NaN	-1.59859	0.673194	0.686792		No
PCRP_PhaseI	17472	DMTF1	'1A8	K562	126.885		2037062	77.8845	83.2754	6		0			-0.0820837	0.0560352			-1.69319	-0.278001	-1.19553	-0.21993	0.386711	0.527172			-2.09037	2.01553	NaN	-0.538254	-1.42125	NaN	-1.83914	0.787614	0.739868		No
PCRP_PhaseI	18422	RPS6KA5	'1A8	MCF7	4.38		38193263	77.0802	36.187	1678		0			0.61216	0.0442494			1.61551	-0.128946	0.200062	0.304296	0.0102499	-0.0834559			1.56765	-0.15029	1.34874	-0.113676	0.0234421	-0.0935299	0.471596	-0.249411	0.0527022		No
PCRP_PhaseI	18626	ZNF697	'1A8	K562	2.52		8335359	86.1391	79.0571	4		0			-0.36092	-0.000993261			-1.55211	-0.0638183	-0.822695	-0.31258	0.235188	0.402522			-2.01256	1.94086	NaN	-0.335556	-1.1821	NaN	-1.42224	0.69297	0.521911		No
PCRP_PhaseI	18694	DMTF1	'1A8	K562	126.885		421784	78.2503	86.8714	1		0			-0.246547	-0.0323241			-1.92906	-0.174739	-1.10858	-0.288592	0.329928	0.496682			-2.40354	2.10142	NaN	-0.447727	-1.48054	NaN	-1.83196	0.593542	0.691665		No
PCRP_PhaseI	18744	ID2	'1A8	HepG2	404.485		3744103	69.3668	68.1976	20		0			-0.123626	-0.111537			-0.671653	-0.101824	-0.310185	-0.362204	-0.321296	0.183833			-0.72162	0.255488	-0.714428	-0.112989	-0.0617138	NaN	-0.774017	0.327214	-0.0896068		No
PCRP_PhaseII	23774-24099	ZNF157	'1A8	K562	0		21118251	89.7142	13.7305	0		0			-0.393834	-0.112811			-1.58241	-1.08065	-1.26933	-1.69095	-1.29452	0.890897			-0.51054	-1.63579	NaN	-0.0796922	0.439255	NaN	0.889655	-0.896961	-0.780352		No
PCRP_PhaseI	19084	U2AF1	'1A8	K562	27.9		11634173	73.3427	54.3037	11		0			-0.743186	-0.340823			-1.56533	-0.0720871	-1.24377	-1.46724	-0.795708	0.598196			-1.38534	1.95375	NaN	-0.38241	-0.799697	NaN	-0.721166	0.752939	-0.551027		No
PCRP_PhaseI	18992	FEZF2	'1A7	K562	0		2858453	64.5573	84.3896	27		0			1.02464	0.622539			-1.01978	-0.165577	-0.923681	-0.0968565	0.265644	0.421886			-1.57525	1.98235	NaN	-0.436178	-1.26915	NaN	-1.59229	0.618782	0.613959		No
PCRP_Phase0	18094	PAX2	'1A7	K562	0		2401448	71.3892	79.3124	5		0			1.09607	0.50537			-1.10819	-0.135759	-0.891368	0.0115238	0.298487	0.40209			-1.51645	1.96768	NaN	-0.427332	-1.24788	NaN	-1.57709	0.53805	0.658925		No
PCRP_PhaseI	17428	GTF2I	'1A7	MCF7	145.47		20199342	85.6792	38.751	127		0			0.89211	0.261387			1.63265	-0.098453	0.13378	0.562976	0.0441562	-0.10224			1.5098	-0.171708	0.577413	-0.0835465	0.041729	-0.139419	0.474257	-0.346749	0.100842		No
PCRP_PhaseI	17409	TFAP2C	'1A7	MCF7	66.915		18594232	87.3002	39.0198	4		0			0.484128	0.178502			0.763732	0.0105617	-0.0295137	0.0596362	-0.0560755	-0.0374524			0.647729	-0.0915431	0.453347	0.0724713	-0.0262345	0.0372299	0.0966533	-0.220967	0.0653292		No
PCRP_PhaseIII	26298	FEZF2	'1A7	K562	0		16817044	83.4423	27.7226	54		0			-0.12191	0.00133006			-0.699318	-0.711955	-0.718274	-1.1726	-1.00858	0.682983			-0.167581	-0.405989	NaN	-0.105199	0.299378	NaN	0.499592	-0.87738	-0.526305		No
PCRP_PhaseII	22848	NAP1L5	'1A7	K562	3.26		18509834	84.2654	23.445	62		0			0.180326	-0.055984			-0.203833	-0.646449	-0.561545	-0.698677	-1.00957	0.585589			0.476357	-1.34082	NaN	0.166585	0.21059	NaN	0.483014	-0.672778	-0.938745		No
PCRP_PhaseI	18705	THRB	'1A6	K562	8.135		249409	77.6449	88.9328	-		0			-0.540748	0.359374			NaN	NaN	NaN	NaN	NaN	NaN			nan	nan	NaN	nan	nan	NaN	nan	nan	nan		No
PCRP_PhaseI	18711	CREB1	'1A6	K562	31.255		390113	77.4971	88.0493	1		0			0.0316431	0.19765			-1.75075	-0.123224	-1.13896	0.0635526	0.442902	0.445353			-2.09619	2.00189	NaN	-0.395956	-1.46768	NaN	-1.3831	0.674436	0.756197		No
PCRP_PhaseI	17489	CREB1	'1A6	K562	31.255		2518762	81.5204	82.9824	13		0			-0.130013	0.141756			-1.81766	-0.189876	-1.13996	-0.373119	0.327386	0.504419			-2.14357	2.04378	NaN	-0.524571	-1.39467	NaN	-1.73534	0.700688	0.703679		No
PCRP_PhaseI	18746	PROX1	'1A6	HepG2	6.795		7116770	67.9891	68.3862	463		0			-0.0840284	0.0763224			0.116597	-0.0693372	-0.0634289	-0.168702	-0.0686317	0.0433564			-0.0210278	0.0119073	-0.0745202	-0.109357	0.0613166	NaN	-0.0822701	0.0602803	0.0228436		No
PCRP_PhaseIII	26322	ZNF358	'1A6	K562	3.945		21843845	85.2857	21.4144	13		0			-0.0105986	0.0490193			-0.78292	-1.08858	-0.970848	-1.03213	-1.70881	0.830377			0.0474292	-1.52617	NaN	-0.0134238	0.378706	NaN	0.848948	-0.977343	-1.07585		No
PCRP_PhaseI	17483	THRB	'1A6	K562	8.135		2376182	82.3942	82.4846	9		0			-0.0487752	0.0318745			-1.86491	-0.189674	-1.25753	-0.343396	0.335961	0.519763			-2.41213	2.08978	NaN	-0.483927	-1.46878	NaN	-1.83029	0.733239	0.642693		No
PCRP_PhaseI	18294	TOX3	'1A6	HepG2	58.57		222674	46.8499	85.0393	-		0			-0.773118	0.0276632			NaN	NaN	NaN	NaN	NaN	NaN			nan	nan	nan	nan	nan	NaN	nan	nan	nan		No
PCRP_PhaseI	18621	ETV7	'1A6	K562	0.02		11567459	84.2667	77.7765	33		0			-0.0994055	0.00808344			-1.09252	-0.107768	-0.77482	-0.335557	0.261136	0.380555			-1.52029	1.79275	NaN	-0.328056	-0.995498	NaN	-1.04262	0.566083	0.585583		No
PCRP_PhaseI	18652	INSM1	'1A6	K562	0		923943	86.986	80.548	1		0			-0.601428	0.00153333			-1.92529	-0.161708	-1.21447	-0.396395	0.304883	0.511598			-2.48518	2.09882	NaN	-0.471299	-1.49208	NaN	-1.88493	0.78021	0.605925		No
PCRP_Phase0	17359	GRHL2	'1A6	K562	0		3599467	84.6068	44.6094	0		0			0.0513283	-0.0302407			-1.24223	-0.284253	-0.915734	-0.123082	0.317123	0.47486			-1.42778	1.7946	NaN	-0.462402	-0.887674	NaN	-0.82089	0.297071	0.674356		No
PCRP_PhaseI	18733	TOX3	'1A6	HepG2	58.57		3620405	72.3196	71.0323	1462		0			-0.114224	-0.037905			-0.714858	-0.164758	-0.416479	-0.209303	-0.246469	0.213693			-0.970272	0.270715	-0.607874	-0.161438	-0.211167	NaN	-0.839778	0.176489	0.0341921		No
PCRP_PhaseII	22983	CDX2	'1A6	K562	0		20558891	85.1767	16.4406	0		0			-0.36136	-0.117712			-1.38391	-0.669025	-1.16557	-1.26593	-0.624397	0.751354			-0.688521	-1.29925	NaN	0.0788026	0.348916	NaN	0.667994	-0.794892	-0.397805		No
PCRP_Phase0	17373	GRHL2	'1A6	HepG2	0		9555718	80.0019	55.1992	1171		0			0.229746	-0.137989			0.379333	0.118098	0.0825272	-0.254423	-0.0235445	-0.119709			0.625935	-0.128854	0.477112	0.207653	0.0618876	NaN	0.224878	-0.319179	-0.114852		No
PCRP_PhaseI	19116	MED4	'1A6	K562	NaN		3622840	61.2167	66.1541	9		0			-0.321263	-0.144324			-2.19341	-0.191907	-1.28057	-0.676095	-0.206399	0.611979			-2.45302	2.30512	NaN	-0.604898	-1.60988	NaN	-2.10139	1.03093	-0.09772		No
PCRP_PhaseI	18762	T	'1A5	HepG2	0		6931052	61.7018	72.1478	2413		0			0.0525814	0.0185721			-0.155862	-0.07177	0.0110577	0.128964	-0.281043	0.0826224			-0.355369	0.178716	-0.143212	-0.137549	0.0495696	NaN	-0.0873234	0.214668	-0.102061		No
PCRP_PhaseII	22633	TOX3	'1A5	K562	0		20868635	80.9379	42.1836	263		0			-0.265834	-0.051161			-0.92253	-0.849453	-0.959062	-1.12531	-0.932538	0.759909			-0.591872	-0.153075	NaN	-0.138157	0.195563	NaN	0.702327	0.107584	-0.501813		No
PCRP_PhaseI	19090-19600	BOLA3	'1A5	K562	85.09		8140029	79.8161	57.7543	2		0			-0.469674	-0.224688			-1.8759	-0.0260204	-1.04119	-0.412206	-0.0694538	0.483176			-2.37181	2.12817	NaN	-0.388817	-1.3093	NaN	-1.7187	0.784068	0.198223		No
PCRP_PhaseI	19171-19557	HOPX	'1A5	K562	0		12845982	80.8368	57.6132	176		0			-0.13491	-0.252607			-1.44237	-0.0432396	-0.823926	-0.00236971	0.289395	0.371405			-1.85823	1.96615	NaN	-0.385639	-1.15122	NaN	-1.22725	0.500736	0.57056		No
PCRP_PhaseI	18379	IRF2	'1A4	K562	8.215		3218035	42.3397	78.1785	47		0			0.705534	0.402066			-1.1022	-0.122541	-0.871868	-0.341252	0.267732	0.404748			-1.34418	1.9093	NaN	-0.357309	-1.11574	NaN	-1.25763	0.354964	0.632245		No
PCRP_PhaseI	19045	HOXB6	'1A4	K562	1.63		576279	65.2901	78.5983	1		0			0.609322	0.392792			-1.24526	-0.132542	-0.863897	-0.0993373	0.315157	0.404699			-1.63335	1.95437	NaN	-0.321399	-1.262	NaN	-1.87962	0.547352	0.642561		No
PCRP_PhaseI	18998	TEAD3	'1A4	K562	3.175		2092613	53.3756	86.7293	19		0			0.375113	0.386097			-1.65058	-0.149434	-1.03605	0.0273447	0.261322	0.469289			-2.1172	2.08964	NaN	-0.436838	-1.42071	NaN	-1.37108	0.664899	0.545519		No
PCRP_PhaseI	19019	NR5A1	'1A4	K562	0.045		2095149	78.5354	87.97	54		0			0.201933	0.350717			-1.72344	-0.0441898	-1.11222	-0.193352	0.192079	0.454194			-2.26204	2.0743	NaN	-0.296227	-1.49658	NaN	-1.75592	0.785141	0.47756		No
PCRP_PhaseI	17475	NFX1	'1A4	K562	23.15		963309	77.961	83.9792	1		0			0.0277022	0.0415502			-1.95935	-0.149827	-1.19737	-0.466976	0.340235	0.501082			-2.839	2.05523	NaN	-0.528002	-1.35973	NaN	-2.08527	0.907909	0.563731		No
PCRP_PhaseI	19100-19609	ZNF169	'1A4	K562	NaN		3287424	76.3295	72.2957	1		0			-0.230503	0.0272378			-1.91147	-0.0832697	-1.13194	-0.334782	0.200391	0.48325			-2.33186	2.14034	NaN	-0.44026	-1.44092	NaN	-1.86783	0.74735	0.420449		No
PCRP_PhaseII	23539-23910	DVL2	'1A4	K562	3.455		16587767	84.6614	22.5409	19		0			0.0218066	0.0190806			-0.82751	-0.44912	-0.539788	-0.0806746	-0.233546	0.509055			-0.247392	0.235038	NaN	-0.0962705	0.108896	NaN	0.515738	-0.876065	-0.0621994		No
PCRP_PhaseI	18635	HOXD9	'1A4	K562	0		5104342	80.8913	75.123	3		0			-0.461282	0.0116522			-1.90332	-0.0882324	-0.956612	-0.113514	0.364273	0.426935			-2.37174	1.9808	NaN	-0.363368	-1.23768	NaN	-1.46928	0.465866	0.716517		No
PCRP_PhaseI	18438	CBX1	'1A4	MCF7	111.265		20977294	67.8328	45.8171	104		0			0.352645	-0.0166236			0.88055	-0.127793	0.169305	0.349937	-0.133632	-0.00861475			0.758821	-0.0700204	0.843183	-0.11239	0.123516	0.0657297	0.312159	-0.00455124	0.00852703		No
PCRP_PhaseII	22866	CTBP1	'1A4	K562	43.21		18255476	87.2476	19.6593	0		0			-0.218727	-0.100979			-1.36696	-1.09634	-1.22654	-1.37284	-0.760102	0.851516			-0.584415	-1.42212	NaN	-0.0571591	0.371204	NaN	0.896297	-0.699988	-0.441622		No
PCRP_PhaseI	19109-19617	CELF6	'1A4	K562	0.015		11781127	85.4259	52.4319	0		0			-0.254662	-0.166144			-1.44434	-0.0220804	-0.822382	-0.0137488	-0.0845686	0.419317			-1.75404	1.96808	NaN	-0.381251	-0.965822	NaN	-1.18261	0.632143	0.151204		No
PCRP_PhaseI	19105-19614	MED8	'1A4	K562	NaN		8852115	79.9181	58.3412	6		0			-0.575241	-0.239485			-2.05744	-0.0607636	-1.18718	-0.590416	-0.0287299	0.522791			-2.61197	2.16858	NaN	-0.524846	-1.34379	NaN	-1.77258	0.858942	0.212581		No
PCRP_PhaseI	18299	ZNF784	'1A4	HepG2	2.795		3017443	24.3383	90.2368	1038		0			-0.343606	-0.247966			-1.09824	-0.249363	-0.684248	-0.529539	-0.474276	0.311052			-1.21041	0.419063	-1.0962	-0.307407	-0.35942	NaN	-1.37152	0.631194	-0.0958342		No
PCRP_PhaseI	19016	HDAC7	'1A3	K562	20		1163486	63.2107	85.7433	5		0			0.271168	0.47618			-1.72244	-0.214986	-1.08067	-0.182504	0.272354	0.507579			-2.11765	2.10673	NaN	-0.532547	-1.46211	NaN	-1.68584	0.780186	0.555981		No
PCRP_PhaseI	18293	ZCCHC7	'1A3	HepG2	9.27		777065	54.8638	81.9329	3		0			0.12109	0.2823			-0.961753	-0.0855863	-0.574019	-0.607744	-0.488999	0.235763			-1.16756	0.36394	-0.977247	-0.0668429	-0.305753	NaN	-1.22541	0.399263	-0.107779		No
PCRP_PhaseI	18732	ZCCHC7	'1A3	HepG2	9.27		6612767	76.7858	61.8509	1228		0			1.06258	0.104064			1.07571	-0.0882058	0.180364	-0.300087	-0.266793	-0.116343			1.00372	-0.12078	1.36984	-0.029972	0.00265332	NaN	-0.231835	-0.229521	-0.146341		No
PCRP_PhaseII	22953	MXI1	'1A3	K562	14.755		16648027	83.1032	33.2884	26		0			0.325106	0.0515031			0.0812161	-1.08084	-0.793977	-0.711143	-1.16117	0.695721			0.398777	-0.627787	NaN	-0.174634	0.232359	NaN	0.528146	-0.216419	-0.931927		No
PCRP_PhaseI	19096-19605	POU3F2	'1A3	K562	NaN		3444092	84.3738	65.7519	1		0			0.12638	0.0100245			-1.49074	-0.0281815	-0.973583	-0.234565	0.188593	0.415182			-1.94563	2.03083	NaN	-0.333932	-1.29881	NaN	-1.58407	0.683089	0.443178		No
PCRP_PhaseI	18618	CDX2	'1A3	K562	0		9599817	85.2982	77.7714	9		0			-0.430382	-0.0453711			-1.79326	-0.069301	-0.932506	-0.0123458	0.316977	0.416073			-2.12448	2.00237	NaN	-0.410274	-1.19006	NaN	-1.28227	0.533223	0.57206		No
PCRP_PhaseII	22870	KLF5	'1A3	K562	0.965		17373041	85.5611	22.2876	13		0			-0.0651274	-0.060925			-1.02518	-1.0526	-1.01129	-0.840933	-1.26608	0.825691			-0.356871	-1.51123	NaN	-0.0674938	0.397142	NaN	0.898965	-0.519677	-0.934944		No
PCRP_PhaseI	18420	EDF1	'1A3	MCF7	413.335		14613573	70.6278	54.2488	35		0			-0.0359151	-0.143985			0.105917	0.0143812	0.3541	-0.0680111	0.109527	-0.0554345			0.25701	-0.0557659	0.704325	-0.00106632	0.195677	-0.16261	-0.107408	-0.195898	0.0266806		No
PCRP_PhaseI	18952	TSC22D1	'1A2	K562	10.31		234652	81.7932	21.9247	3		0			0.591228	0.521678			-1.2115	-0.51301	-2.27327	NaN	-0.0882396	0.754851			0.750249	1.17416	NaN	-1.37457	-0.585172	NaN	NaN	-1.02192	1.25199		No
PCRP_PhaseI	18295	SOX9	'1A2	HepG2	10.49		268988	39.1142	87.7043	0		0			-0.108461	0.269322			-1.12636	-0.170099	-0.671651	-1.55895	-0.364237	0.278724			-1.03981	0.382924	-0.996248	-0.116002	-0.446112	NaN	-2.12623	0.457986	-0.0635098		No
PCRP_PhaseI	18403	KDM8	'1A2	K562	2.785		10217577	51.0062	71.1437	162		0			0.542656	0.249092			-0.567231	-0.169511	-0.672276	0.0617124	0.0699186	0.363315			-0.694115	1.54195	NaN	-0.231571	-0.646869	NaN	-0.325675	0.23416	0.3222		No
PCRP_PhaseII	22199-22789	NFATC1	'1A2	K562	1.325		3052132	78.9579	76.2865	9		0			0.0702974	0.235417			-1.4203	-0.0755777	-0.734267	-0.225855	0.394398	0.353089			-1.79196	1.9272	NaN	-0.308137	-1.16451	NaN	-1.56284	0.455727	0.646537		No
PCRP_PhaseI	19055	TSC22D1	'1A2	K562	10.31		5272048	81.9514	73.4355	6		0			0.374028	0.212705			-0.856919	-0.102316	-0.831584	-0.392205	0.302409	0.363466			-1.27556	1.84413	NaN	-0.360535	-1.08639	NaN	-1.15336	0.525361	0.61307		No
PCRP_PhaseII	22593-23040	UBE3A	'1A2	K562	31.365		1508758	66.8259	83.9394	1		0			-0.598203	0.160992			-2.1393	-0.113342	-1.12814	-0.038417	0.272732	0.48672			-2.69173	2.11236	NaN	-0.412665	-1.47949	NaN	-1.65103	0.676956	0.592694		No
PCRP_PhaseI	17451	ZNF277	'1A2	K562	16.555		3613056	84.9371	80.2911	1		0			0.0869222	0.160966			-1.43127	-0.19281	-1.14354	-0.310314	0.370848	0.479225			-2.01341	2.01322	NaN	-0.445589	-1.40505	NaN	-1.53749	0.696236	0.69867		No
PCRP_PhaseIII	26282-28247	TSC22D1	'1A2	K562	10.31		2916790	78.351	83.331	42		0			-0.229563	0.137349			-1.9468	-0.116699	-1.07614	-0.164488	0.269329	0.476811			-2.4009	2.08293	NaN	-0.416875	-1.41659	NaN	-1.94616	0.673765	0.600512		No
PCRP_PhaseI	18673	ZNF277	'1A2	K562	16.555		2162248	79.5571	88.2169	-		0			-0.356938	0.131354			NaN	NaN	NaN	NaN	NaN	NaN			nan	nan	NaN	nan	nan	NaN	nan	nan	nan		No
PCRP_PhaseI	18698	BACH1	'1A2	K562	22.88		2023580	71.2216	85.1247	10		0			-0.317045	0.104592			-2.13722	-0.170773	-1.17696	-0.257826	0.106629	0.545387			-2.6357	2.20103	NaN	-0.515801	-1.55767	NaN	-2.09507	0.840067	0.394774		No
PCRP_PhaseI	19049	SMAD3	'1A2	K562	11.535		6003275	80.1953	74.0969	2		0			0.186948	0.0969909			-0.963683	-0.157774	-0.763155	0.08685	0.302701	0.374437			-1.35539	1.82151	NaN	-0.367623	-1.04951	NaN	-1.1069	0.522131	0.635212		No
PCRP_PhaseI	17476	BACH1	'1A2	K562	22.88		1630890	76.1867	82.7549	6		0			0.120004	0.0391007			-1.80637	-0.241213	-1.15354	-0.130629	0.39906	0.509077			-2.23943	2.07525	NaN	-0.474107	-1.48903	NaN	-1.74943	0.634475	0.734653		No
PCRP_PhaseII	22869	ZBTB22	'1A2	K562	4.735		19301549	85.0643	22.5378	18		0			0.181052	0.00634235			-0.430456	-0.909618	-0.634406	-0.933425	-0.878221	0.68006			-0.00935268	-1.29654	NaN	-0.0150876	0.324358	NaN	0.667726	-0.647067	-0.692471		No
PCRP_PhaseII	22946	ZUFSP	'1A2	K562	23.085		22842738	87.1446	23.0971	19		0			0.124336	-0.00500582			-0.302997	-1.28798	-0.865664	-1.07366	-1.6272	0.807284			0.110232	-1.80527	NaN	-0.126594	0.396951	NaN	0.826099	-0.637801	-1.08499		No
PCRP_PhaseI	18734	SOX9	'1A2	HepG2	10.49		5454114	76.871	73.123	4456		0			-0.0992621	-0.0735223			-0.511175	-0.176576	-0.170386	-0.0257311	-0.176412	0.16949			-0.662253	0.213734	-0.491667	-0.1712	-0.0701171	NaN	-0.742876	0.0953793	0.0361894		No
PCRP_PhaseI	18413	ZNF134	'1A2	MCF7	5.895		15979685	67.6069	56.537	52		0			-0.011496	-0.13647			0.101836	0.017852	0.231404	-0.0116931	0.0827468	-0.0402221			0.0195782	-0.0572924	0.587263	0.0174698	0.127831	-0.0128862	-0.114514	-0.168199	0.0594284		No
PCRP_PhaseI	18452	GABPB1	'1A2	MCF7	37.835		4523524	74.153	64.4622	11		0			0.230259	-0.164712			0.435212	-0.267853	0.549638	-0.194554	-0.288274	0.050463			0.614672	0.231596	-0.463148	-0.356806	0.190202	-0.207687	-0.340291	-0.0253186	-0.290114		No
PCRP_PhaseI	19156	PCGF6	'1A2	K562	11.525		24977089	80.6452	36.774	4299		0			-0.155136	-0.312606			-1.03369	0.153849	-0.274552	0.0833403	0.722449	-0.0235274			-1.31568	1.4856	NaN	-0.319316	-0.555787	NaN	-0.769546	-0.416296	0.846227		No
PCRP_PhaseI	19009	ZSCAN22	'1A12	K562	3.25		533630	78.2568	83.8702	1		0			0.614625	0.454614			-1.47344	-0.167649	-1.13172	-0.339257	0.399015	0.465184			-1.97021	2.02144	NaN	-0.517093	-1.35914	NaN	-1.96635	0.723405	0.688724		No
PCRP_PhaseIII	26450-28233	ZNF581	'1A12	K562	12.82		5417001	75.4882	68.7047	176		0			0.471408	0.210111			-0.788568	-0.0491964	-0.501689	0.227049	0.295001	0.246261			-1.2316	1.76017	NaN	-0.305198	-0.86923	NaN	-0.971544	0.313567	0.5419		No
PCRP_PhaseI	18700	DR1	'1A12	K562	25.98		9846405	74.5951	84.8206	225		0			-0.0520127	0.182021			-1.7676	-0.15667	-1.02688	-0.149128	0.325757	0.468998			-2.25234	2.0418	NaN	-0.418866	-1.36432	NaN	-1.71726	0.626485	0.656325		No
PCRP_PhaseI	17478	DR1	'1A12	K562	25.98		1799929	78.9944	82.7618	5		0			0.00752304	0.103835			-1.66353	-0.227028	-1.06925	0.0132648	0.417587	0.479325			-2.09698	2.04431	NaN	-0.479687	-1.34898	NaN	-1.73181	0.629314	0.665892		No
PCRP_PhaseII	22967	ZNF598	'1A12	K562	13.965		21652642	87.3336	15.1289	4		0			0.109626	0.0265148			-0.645873	-1.30233	-0.830209	-1.37155	-1.49034	0.830575			0.0789728	-2.20899	NaN	-0.0496496	0.426361	NaN	0.851562	-0.862168	-1.2887		No
PCRP_PhaseI	19041	MED1	'1A11	K562	27.75		122916	66.24	77.9756	0		0			0.474706	0.580449			-1.303	-0.248365	-0.812225	0.411766	0.436933	0.412416			-1.92943	1.97991	NaN	-0.457318	-1.21174	NaN	-0.989835	0.419419	0.709814		No
PCRP_PhaseI	19042	ZNF438	'1A11	K562	0.405		126252	73.5158	75.8723	0		0			0.680579	0.134505			-1.87732	-0.0413235	-1.09955	0.148487	0.337866	0.426069			-2.1652	2.04443	NaN	-0.312744	-1.44534	NaN	-1.79676	0.647594	0.616647		No
PCRP_PhaseIII	26155-28310	STAT5A	'1A11	K562	99.875		2238515	55.6046	88.2934	64		0			0.00842898	0.0838044			-1.81667	-0.14333	-0.884899	-0.505442	0.182311	0.472244			-2.43849	2.07555	NaN	-0.46365	-1.30912	NaN	-2.21485	0.734301	0.514475		No
PCRP_PhaseII	22863-23325	CREBL2	'1A11	K562	3.03		4142222	86.1058	80.674	7		0			-0.180614	0.0584522			-1.66	-0.0692382	-0.983684	-0.152104	0.382665	0.409343			-2.09965	1.97724	NaN	-0.368814	-1.28039	NaN	-1.85147	0.597903	0.684235		No
PCRP_PhaseIII	26327	NFYC	'1A11	K562	34.865		18440751	86.5727	24.6291	54		0			0.0979884	0.0423921			-0.290549	-0.617565	-0.47034	-0.846938	-0.851477	0.560514			0.238593	-0.796925	NaN	0.0126748	0.254526	NaN	0.56264	-0.993003	-0.625987		No
PCRP_PhaseII	23553-23919	NCOA3	'1A11	K562	15.07		4656920	85.2684	62.4065	5		0			-0.25967	0.0355199			-1.38529	-0.0538214	-0.821972	-0.0387741	0.344954	0.363328			-1.54358	1.81369	NaN	-0.294524	-0.970512	NaN	-1.3348	0.421217	0.59706		No
PCRP_PhaseII	22201-22791	HESX1	'1A11	K562	0.41		7005949	84.7086	51.4254	5		0			0.048463	0.00879546			-1.18599	-0.0024524	-0.570849	-0.0529582	0.409712	0.257842			-1.40142	1.69662	NaN	-0.17228	-0.809503	NaN	-1.19564	-0.0694593	0.690842		No
PCRP_PhaseII	23552	ZBTB39	'1A11	K562	6.13		19999149	87.1626	25.7944	50		0			0.289958	-0.0011643			0.123189	-0.948919	-0.754688	-0.397799	-0.856892	0.635607			0.411734	-1.00973	NaN	-0.139515	0.234847	NaN	0.773802	-0.506337	-0.64664		No
PCRP_PhaseII	22847	CSTF2	'1A11	K562	31.32		17302372	78.7265	26.7572	53		0			0.225131	-0.0239835			-0.4102	-1.13417	-1.04829	-1.38945	-0.910565	0.785824			0.200692	-0.661344	NaN	-0.156025	0.283583	NaN	0.58528	-0.536916	-0.777756		No
PCRP_PhaseII	23851-24499	HDGFL1	'1A11	K562	0.025		12915921	84.1928	43.7966	10		0			-0.30739	-0.0798061			-1.1781	-0.120707	-0.558118	-0.130511	0.270619	0.341357			-1.18728	1.28818	NaN	-0.0284643	-0.441316	NaN	-0.34609	-0.236288	0.508535		No
PCRP_PhaseII	22975	TFAP2D	'1A11	K562	0		5297643	85.7774	33.5071	9		0			-0.315665	-0.199274			-1.11495	-0.588643	-1.31874	0.284311	-0.13371	0.669561			-0.543374	0.937123	NaN	-0.0832319	-0.246527	NaN	-0.304216	0.46687	-0.0665779		No
PCRP_PhaseI	18710	ZNF143	'1A10	K562	34.97		403987	82.844	88.2048	9		0			1.04171	0.474303			-0.868682	-0.186658	-1.08701	-0.670373	0.372413	0.435554			-1.54424	1.93157	NaN	-0.522221	-1.26852	NaN	-2.09863	0.841135	0.653578		No
PCRP_PhaseI	19001	HES3	'1A10	K562	0		3737694	57.3471	86.6104	97		0			0.530341	0.410425			-1.39679	-0.165174	-1.06539	0.103458	0.314065	0.456491			-1.91294	2.03779	NaN	-0.438247	-1.38453	NaN	-1.51426	0.672578	0.617123		No
PCRP_PhaseI	18688	DEAF1	'1A10	K562	20.59		399324	82.2756	86.3093	5		0			0.0828751	0.402408			-1.66891	-0.148019	-0.924804	-0.301124	0.38526	0.436881			-1.93775	2.00357	NaN	-0.427955	-1.31936	NaN	-1.59905	0.575179	0.696293		No
PCRP_PhaseI	18687	CLOCK	'1A10	K562	7.47		510473	69.192	89.5558	2		0			-0.217709	0.36127			-1.8009	-0.153034	-1.10594	-0.229869	0.294105	0.487381			-2.22523	2.0576	NaN	-0.39533	-1.38175	NaN	-1.89195	0.72409	0.549931		No
PCRP_PhaseI	17466	DEAF1	'1A10	K562	20.59		2943171	76.8629	83.4523	22		0			0.171766	0.2641			-1.57972	-0.193298	-1.11784	-0.275196	0.358507	0.485061			-2.08123	2.05756	NaN	-0.473315	-1.43308	NaN	-1.89052	0.670872	0.689363		No
PCRP_PhaseI	17410	MAFB	'1A10	MCF7	4.32		17132110	86.4997	41.6433	1		0			0.524861	0.178422			0.681126	0.0401561	-0.0671263	0.130946	-0.0354895	-0.0457976			0.530163	-0.0954193	0.359852	0.0911079	-0.0121166	0.122273	0.0709391	-0.267066	0.0784789		No
PCRP_PhaseII	22588-23036	SMURF1	'1A10	K562	6.265		267957	20.5813	96.4096	86		0			-0.17907	0.16634			-1.91395	-0.102008	-1.17212	-0.559088	0.279694	0.487653			-2.45161	2.00582	NaN	-0.423046	-1.39296	NaN	-2.17593	0.933762	0.579422		No
PCRP_PhaseI	17465	CLOCK	'1A10	K562	7.47		4121814	71.2314	84.2197	11		0			0.0369449	0.0630248			-1.53256	-0.206699	-1.16336	-0.134077	0.353763	0.49256			-2.12174	2.03777	NaN	-0.439695	-1.43396	NaN	-1.52039	0.773706	0.620334		No
PCRP_PhaseII	22225-22811	NR0B1	'1A10	K562	0		7745795	84.3937	51.8546	24		0			0.0570768	-0.00261081			-1.114	-0.00989878	-0.675657	-0.000983999	0.379152	0.285458			-1.4712	1.75071	NaN	-0.221156	-0.882283	NaN	-1.28022	0.0773016	0.695772		No
PCRP_PhaseI	19123-19623	GTF2H1	'1A10	K562	NaN		4284736	77.9672	67.9813	3		0			-0.2057	-0.0504655			-2.06598	-0.0183404	-1.14793	-0.0996766	0.0486676	0.480907			-2.37156	2.1309	NaN	-0.403267	-1.36053	NaN	-1.27679	0.743805	0.279242		No
PCRP_PhaseI	18980	ARID2	'1A1	K562	NaN		3477145	61.9597	85.9714	21		0			0.632857	0.522551			-1.41356	-0.171745	-1.08862	-0.0178693	0.299281	0.468714			-1.94655	2.04418	NaN	-0.4362	-1.41408	NaN	-1.511	0.651679	0.648701		No
PCRP_PhaseI	19008	ZFP41	'1A1	K562	2.24		708329	65.9043	88.7052	9		0			0.211116	0.460781			-1.56054	-0.13036	-1.01753	-0.216183	0.341577	0.445282			-1.90099	2.00668	NaN	-0.396158	-1.39888	NaN	-1.82533	0.760621	0.620593		No
PCRP_PhaseI	18993	NR1H3	'1A1	K562	17.835		594883	50.9796	88.3774	1		0			0.449167	0.373336			-1.51907	-0.197647	-1.05143	0.043694	0.223997	0.490173			-2.06431	2.06492	NaN	-0.550729	-1.3711	NaN	-1.55872	0.782119	0.569269		No
PCRP_PhaseI	17434-22042	SOX3	'1A1	MCF7	3.45		1741481	49.4696	71.521	3		0			0.864662	0.258674			0.745142	-0.283232	0.301854	0.562438	0.197087	0.0270988			0.824397	0.123863	-1.48145	-0.263249	0.0263585	0.16994	0.0266968	-0.278884	-0.0718963		No
PCRP_PhaseI	18713	HINFP	'1A1	K562	22		520655	76.0252	87.3417	4		0			0.463391	0.207365			-1.40272	-0.106455	-0.718467	0.0376008	0.432291	0.350075			-1.59091	1.91134	NaN	-0.337215	-1.223	NaN	-1.58991	0.546327	0.686352		No
PCRP_PhaseI	17491	HINFP	'1A1	K562	22		4118893	82.449	82.7807	20		0			0.357025	0.197452			-1.41346	-0.174543	-1.07526	-0.0689296	0.370272	0.456666			-1.948	2.00088	NaN	-0.433809	-1.35971	NaN	-1.71653	0.649345	0.706452		No
PCRP_PhaseI	19035	CTBP1	'1A1	K562	43.21		2430827	79.5958	73.5581	3		0			0.210411	0.180876			-1.44649	-0.155664	-0.990919	0.049834	0.341397	0.44031			-1.88156	2.03069	NaN	-0.440646	-1.30144	NaN	-1.71997	0.46974	0.690604		No
PCRP_PhaseII	23532-23903	NACC1	'1A1	K562	23.535		22904433	84.1888	17.6438	95		0			0.532156	0.174263			0.332911	-1.68713	-1.2066	-2.44204	-2.18555	0.846404			0.716448	-1.90877	NaN	-0.278909	0.377084	NaN	0.795882	-0.705096	-1.74187		No
PCRP_PhaseI	17440-22048	RUVBL1	'1A1	MCF7	73.365		3439000	86.2471	54.5587	1		0			0.424048	0.156043			0.247269	-0.242431	0.06736	0.240543	0.0605261	0.076726			0.269249	0.17377	-0.627735	-0.231033	-0.110821	0.0120668	-0.0152515	-0.231194	-0.0251726		No
PCRP_PhaseI	18644	PRDM8	'1A1	K562	0		8697853	85.4309	76.4288	30		0			0.0172771	0.137008			-1.45021	-0.102209	-0.831921	-0.0503928	0.393328	0.382623			-1.82158	1.90719	NaN	-0.336425	-1.13302	NaN	-1.44894	0.402038	0.706651		No
PCRP_PhaseI	18647	ONECUT1	'1A1	K562	0		3968121	79.2097	80.1722	9		0			-0.103174	0.119109			-1.78429	-0.16787	-1.07391	-0.131525	0.345428	0.477599			-2.25532	2.06393	NaN	-0.467791	-1.42392	NaN	-1.77126	0.669869	0.675846		No
PCRP_PhaseI	18617	POU6F1	'1A1	K562	2.075		8708175	83.6505	78.6864	13		0			-0.320672	0.0266267			-1.63823	-0.0992844	-0.922828	-0.225491	0.313083	0.425549			-2.10474	2.00364	NaN	-0.391967	-1.25529	NaN	-1.62885	0.559044	0.631413		No
PCRP_PhaseIII	26438-28228	ZNF385B	'1A1	K562	0.03		15944011	85.3615	38.7044	47		0			-0.105477	0.0221094			-0.762116	0.133388	-0.28996	-0.117743	0.0591138	0.1317			-0.725346	1.17073	NaN	0.0590527	-0.320194	NaN	-0.41015	-0.571634	0.287703		No
PCRP_PhaseII	23551	PHF7	'1A1	K562	17.1		24701204	86.2891	19.9702	22		0			-0.28813	-0.0298501			-0.918717	-1.68878	-1.99266	-2.19188	-1.90892	1.0121			-0.557873	-1.72802	NaN	-0.227393	0.508927	NaN	0.975731	-0.48305	-1.50394		No
PCRP_PhaseII	23563-23922	TADA2B	'11A3	K562	2.445		2922053	88.52	69.8241	0		0			-0.0257794	0.08721			-1.59262	-0.0182819	-0.826688	-0.0876486	0.300964	0.368094			-1.96096	1.93314	NaN	-0.313626	-1.14262	NaN	-1.6164	0.417462	0.662482		No
Samples Withheld							Sequenced <100k tags
PCRP_PhaseI	17486	NCOA1	'1E8	K562	14.68		1637	60.9235	69.2176	0		1			NaN	1.04113			NaN	-1.02758	0.11905	NaN	NaN	0.77371			NaN	2.20391	NaN	-1.56722	-0.455889	NaN	NaN	NaN	0.836954		No
PCRP_PhaseI	18937	FOSL1	'1E3	K562	4.44		3696	67.0527	36.384	0		1			0.742022	-0.0986326			NaN	NaN	0.212159	NaN	NaN	0.99235			2.23568	NaN	NaN	NaN	-1.09975	NaN	NaN	NaN	1.93006		No
PCRP_PhaseI	18936	MEF2A	'1B7	K562	5.695		3786	65.3749	37.8184	1		2			0.715612	1.19689			NaN	0.387454	NaN	NaN	NaN	0.729316			1.97264	1.81159	NaN	0.847821	NaN	NaN	NaN	NaN	NaN		No
PCRP_PhaseI	18643	BSX	'4D10	K562	0		3804	71.3595	80.2826	0		1			0.72311	NaN			-0.262124	-0.0782095	-0.738931	-0.447826	0.320566	0.263652			-1.71541	1.7865	NaN	-0.724758	-1.05084	NaN	-1.73929	1.31978	0.39401		No
PCRP_PhaseI	18940	ZNF446	'3C8	K562	1.22		4337	65.6702	37.0044	0		2			0.514924	0.259233			1.27393	NaN	NaN	NaN	NaN	0.99235			3.23568	NaN	NaN	NaN	NaN	NaN	NaN	1.46351	NaN		No
PCRP_PhaseI	19098-19607	SAMD4B	'2A6	K562	23.425		4435	5.19506	96.8574	0		0			NaN	-1.27134			-2.10458	-0.113313	-0.844424	-0.290285	0.340604	0.434017			-2.14284	1.9999	NaN	-0.409675	-1.19285	NaN	NaN	0.544431	0.680835		No
PCRP_PhaseI	18935	ETS1	'1C8	K562	0.045		4813	63.047	39.36	0		1			NaN	0.104584			1.27393	NaN	NaN	NaN	NaN	0.99235			2.23568	2.07463	NaN	NaN	-1.09975	NaN	NaN	NaN	NaN		No
PCRP_PhaseI	18939	ZNF438	'1A11	K562	0.405		5251	70.8042	32.362	1		2			0.830781	NaN			NaN	0.650488	NaN	NaN	NaN	0.577312			1.23568	NaN	NaN	1.11086	-1.09975	NaN	NaN	1.46351	NaN		No
PCRP_PhaseI	18938	MED1	'1A11	K562	27.75		5601	64.481	38.2289	1		1			NaN	-1.69143			0.788502	NaN	-0.273268	NaN	NaN	0.828851			0.750249	1.5892	NaN	NaN	-0.585172	NaN	NaN	1.97808	NaN		No
PCRP_PhaseI	17463	SOX5	'1C12	K562	8.935		7468	82.0719	78.1712	0		0			0.752338	0.496646			-1.99909	0.284361	-2.64582	-0.769754	0.239646	0.43815			-1.31029	2.11362	NaN	-0.0566016	-2.16029	NaN	NaN	0.843542	0.521598		No
PCRP_PhaseI	18636	MESP1	'1D11	K562	0.13		12634	83.5138	78.0948	0		0			-0.423787	0.150636			-0.921419	0.0639501	-0.983188	-1.42905	-0.213198	0.405812			-1.11167	2.01678	NaN	-0.599066	-1.36909	NaN	-2.72051	0.701123	0.660715		No
PCRP_PhaseI	18640	ZNF608	'1A10	K562	0.485		16797	87.469	77.9646	-		0			1.03644	-0.093752			NaN	NaN	NaN	NaN	NaN	NaN			nan	nan	NaN	nan	nan	NaN	nan	nan	nan		No
PCRP_PhaseI	18961	NACC1	'1A8	K562	23.535		19066	81.5344	21.9577	2		1			0.907946	0.614186			-1.31103	0.065526	-0.372803	1.50326	-1.18778	0.314278			0.235676	1.48966	NaN	-0.152179	-0.877353	NaN	0.211799	-0.121451	0.345101		No
PCRP_PhaseI	18963	ELF3	'8F6	K562	0.415		20894	71.6714	31.9986	2		0			0.813033	-0.0385507			NaN	-0.143061	-0.58139	NaN	0.0186756	0.520729			0.442127	2.15555	NaN	-0.682694	-1.47826	NaN	NaN	-0.915001	0.551552		No
PCRP_PhaseI	18941	SMAD2	'1C12	K562	27.32		24963	69.3119	33.6676	1		0			0.446805	0.14672			-1.31103	-0.127119	-0.787841	NaN	0.812225	0.314278			0.925336	1.02732	NaN	-0.521413	-0.732014	NaN	NaN	-0.168757	0.882757		No
PCRP_PhaseI	18942	HOXB6	'1A4	K562	1.63		26179	64.92	38.1922	4		1			1.04127	0.783087			-1.31103	-0.349512	0.212159	NaN	-1.18778	0.407387			1.23568	0.811592	NaN	-0.474107	-0.514783	NaN	NaN	0.878549	-0.654899		No
PCRP_PhaseI	18639	ZFPM2	'2D5	K562	7.015		31307	89.2632	79.8191	0		0			0.262488	-0.256238			-1.6136	-0.198356	-0.877	-2.32286	0.378417	0.466959			-2.59384	1.95477	NaN	-0.522259	-1.25683	NaN	-3.61771	0.735538	0.828472		No
PCRP_PhaseI	18960	CARM1	'1B4	K562	26.275		34238	81.5619	21.9794	3		0			0.910538	0.160646			-2.15903	-0.323039	-0.898872	0.655267	0.771583	0.417372			-0.197283	1.44902	NaN	-0.322104	-0.532705	NaN	NaN	0.35248	0.304459		No
PCRP_PhaseI	18962	ZSCAN2	'2D7	K562	5.48		34280	77.648	26.0788	1		1			1.24768	0.76412			NaN	0.00558344	-0.0848225	0.98389	0.292851	0.209941			0.131339	1.14021	NaN	-0.186127	-0.74465	NaN	-0.307575	-0.0558631	0.825726		No
PCRP_PhaseI	18959	ID3	'2H2	K562	26.845		44325	81.312	22.5357	3		3			0.828275	0.837418			NaN	NaN	NaN	NaN	NaN	1.31428			3.14257	NaN	NaN	NaN	NaN	NaN	NaN	NaN	1.25199		No
PCRP_PhaseI	18964	NFIA	'2C6	K562	6.57		53951	79.0379	24.6973	3		3			1.15253	0.776759			NaN	-0.834938	-0.273268	NaN	0.91176	0.506923			2.33521	NaN	NaN	0.625428	-1.58517	NaN	NaN	NaN	0.444636		No
PCRP_PhaseI	17462	CDC5L	'2C6	K562	16.085		55262	79.8499	75.5242	0		0			-0.438023	-0.278701			-1.60241	-0.291741	-0.979684	-0.0105071	0.172922	0.527822			-1.54113	2.07041	NaN	-0.665951	-1.37405	NaN	NaN	0.637796	0.754161		No
PCRP_PhaseI	18637	TFAP2D	'1A12	K562	0		59106	87.0983	78.0589	0		0			0.51297	-0.12412			-2.29682	-0.149742	-0.970319	-0.248056	0.50716	0.445274			-2.03165	2.11195	NaN	-0.50439	-1.41953	NaN	-2.54095	0.403785	0.75424		No
PCRP_PhaseI	18703	ZNF174	'1D12	K562	8.575		78777	80.6269	89.5097	-		0			0.0083855	0.0830094			NaN	NaN	NaN	NaN	NaN	NaN			nan	nan	NaN	nan	nan	NaN	nan	nan	nan		No
PCRP_PhaseI	18659	USF1	'1B8	K562	32.875		83642	89.2981	75.3962	0		0			0.541044	0.251244			-1.57807	-0.0763552	-1.01925	0.558156	0.471188	0.378756			-2.13489	2.01824	NaN	-0.387583	-1.46388	NaN	-1.38116	0.351683	0.896804		No
PCRP_PhaseI	19039	MEF2A	'1B7	K562	5.695		84713	68.1341	77.5917	0		0			0.590604	0.4087			-1.69416	-0.11793	-0.873288	-0.879864	0.157017	0.463051			-2.14976	2.07578	NaN	-0.335976	-1.21216	NaN	-2.58867	0.515485	0.419101		No
PCRP_PhaseI	19040	FOSL1	'1E3	K562	4.44		86530	68.9178	75.904	0		0			0.447447	0.575248			-1.28679	-0.0658773	-1.00063	-0.609992	0.526788	0.368808			-1.61455	1.97334	NaN	-0.141107	-1.40565	NaN	-1.63842	0.374102	0.664804		No
PCRP_PhaseI	18931	HMG20B	'1B5	K562	31.365		93007	78.5069	24.8659	3		1			0.381147	0.602315			NaN	NaN	NaN	NaN	0.91176	1.09189			2.33521	NaN	NaN	NaN	-0.585172	NaN	NaN	0.978084	0.444636		No
PCRP_PhaseI	18965	NFIX	'3B4	K562	2.63		94166	83.7157	20.2387	3		1			1.28109	0.372073			0.273929	-1.34951	NaN	NaN	NaN	0.99235			2.23568	2.07463	NaN	NaN	-2.09975	NaN	NaN	0.463511	NaN		No
PCRP_PhaseI	19043	ZNF446	'3C8	K562	1.22		98199	68.5576	76.5623	0		0			0.442634	0.423355			-1.954	0.0167389	-1.01577	0.619288	0.223704	0.394897			-2.23563	1.95767	NaN	-0.344149	-1.40113	NaN	-0.549013	0.463511	0.819505		No

## Sheet: ReplicateStats
Target	Antibody	Results Replicated in at least 2 samples	Replicate 1	Replicate 2	Replicate 3	Replicate 4	Replicate 5	Replicate 6	Replicate 7	Replicate 8	Replicate 9	Replicate 10	Replicate 11	Replicate 12	Replicate 13	Replicate 14	Replicate 15	Replicate 16	Replicate 17	Replicate 18	Replicate 19	Replicate 20	Replicate 21	Replicate 22	Replicate 23	Replicate 24	Replicate 25	Replicate 26	Replicate 27	Replicate 28	Replicate 29	Replicate 30	Replicate 31	Replicate 32	Replicate 33	Replicate 34	Replicate 35	Replicate 36	Replicate 37	Replicate 38	Replicate 39	Replicate 40	Replicate 41	Replicate 42	Replicate 43	Replicate 44	Replicate 45
HOXB2	'1F2	Insulator-enrich replicated	18958	19061	26283
DRAP1	'1A12	Insulator-enrich replicated	22944	26287
SIX5	'2H4	Insulator-enrich replicated	24062	26289
ZNF81	'2C7	Insulator-enrich replicated	26326	22605-23050
USF1	'1B8	Motif replicated	15413	16658	16666	17357	17364	17371	17378	18097	18105	18113	18121	18327	18409	18457	18659	18718	18766	18974	19022	19077	26446	26468	28409	28417	19125-19625	19173-19559	22202-22792	22226-22812	22611-23055	22635-23062	22885-23334	22961-23075	22985-23088	23540-23911	23566-23925	23590-23939	23813-24138	23839-24494	23863-24503	24066-24404	26328-28262	28411-28669	28423-28675	28429-28679	28435-28684
NRF1	'3H1	Motif replicated	15399	16657	16665	17356	17363	17370	17377	17496	18095	18102	18111	18118	22856	28419	26157-28312	28413-28670	28425-28676	28431-28680	28437-28686
YY1	'1B2	Motif replicated	17358	17365	17372	17379	18098	18114	28412	28418	28424	28430	22974-23082	28436-28685
GRHL2	'1A6	Motif replicated	15396	16655	16663	17359	17366	17373	17380	18093	18101	18109	18117
GABPA	'2G3	Motif replicated	28421	22213-22800	26154-28309	28415-28672	28427-28678	28433-28682	28439-28688
ELK1	'1D9	Motif replicated	15402	16628	16660	23571	26320
HSF1	'1A10	Motif replicated	28397	28401	28405
HSF1	'1A8	Motif replicated	28398-28663	28402-28665	28406-28667
NFIA	'2C6	Motif replicated	18964	19067	26151-28308
ZNF143	'1A10	Motif replicated	17488	18710	26150-28307
THAP4	'1A7	Motif replicated	23829-24491	26453-28234
THAP5	'2D4	Motif replicated	23827	26459
THAP7	'3H4	Motif replicated	23856	26427
USF2	'1A11	Motif replicated	23850	26325-28259
YY1	'1A5	Motif replicated	17423-22033	26158-28313
GATA4	'1A7	Motif replicated	18306	18745
GTF2F2	'1B3	Motif replicated	23509-23880	26448
HOXB9	'1E6	Motif replicated	19144	26318
MEF2D	'3A4	Motif replicated	22195	26301
MEN1	'1H6	Motif replicated	22196-22787	26461-28236
MXD3	'2B4	Motif replicated	22204-22794	26467-28240
STAT3	'2F12	Motif replicated	22217-22804	26160-28315
ZFAT	'2D2	Motif replicated	23837-24493	26288-28248
ATAD2	'2E5	Promoter-enrich replicated	23860	26319
GTF2H2C	'2C9	Promoter-enrich replicated	24056	26153
HDAC7	'1C4	Transcript-enrich replicated	23581	26323
FOS	'1A7	TSS-enrich replicated	18966	19069	26147
NAB2	'2G1	TSS-enrich replicated	22212-22799	26152
PRDM16	'1B9	TSS-enrich replicated	22628	26316
SMAD2	'1B10	TSS-enrich replicated	23561	26304
ZNF438	'1H5	TSS-enrich replicated	23549	26303
ZNF543	'1A8	TSS-enrich replicated	23830	26302
HSF1	'1C1	Failure Replicated	17414	28399-28664	28403-28666	28407-28668
ELF3	'8F6	Failure Replicated	18963	19066	28260-28317
HMGB1	'1E4	Failure Replicated	15403	16629	16661
MAX	'1E7	Failure Replicated	17487	18709	26159-28314
PRDM1	'2C5	Failure Replicated	18929	19032	26292
TSC22D1	'1A2	Failure Replicated	18952	19055	26282-28247
ABTB1	'1C5	Failure Replicated	18943	19046
AKNA	'1C7	Failure Replicated	18322	18761
ARID3A	'1E9	Failure Replicated	18312	18751
BACH1	'1A2	Failure Replicated	17476	18698
BACH2	'3B8	Failure Replicated	17453	18675
BOLA3	'1C10	Failure Replicated	22608-23052	26305-28253
BRD3	'1C12	Failure Replicated	17383	17400
CARM1	'1B4	Failure Replicated	18960	19063
CDC5L	'2C6	Failure Replicated	17462	18684
CEBPE	'1F8	Failure Replicated	18285	18724
CEBPZ	'3C7	Failure Replicated	24037-24389	26440
CLOCK	'1A10	Failure Replicated	17465	18687
CPEB3	'1C1	Failure Replicated	18297	18736
CREB1	'1A6	Failure Replicated	17489	18711
CXXC1	'1E5	Failure Replicated	18950	19053
DAXX	'8B5	Failure Replicated	18949	19052
DBX2	'1D8	Failure Replicated	19015	26297
DEAF1	'1A10	Failure Replicated	17466	18688
DMTF1	'1A8	Failure Replicated	17472	18694
DNMT3L	'1E3	Failure Replicated	18314	18753
DR1	'1A12	Failure Replicated	17478	18700
ELF2	'1F1	Failure Replicated	17485	18707
ELK1	'1B9	Failure Replicated	17490	18712
ESRRA	'1B10	Failure Replicated	17460	18682
ETS1	'1C8	Failure Replicated	18935	19038
EZH2	'1B3	Failure Replicated	17457	18679
FEZF2	'1A7	Failure Replicated	18992	26298
FOSB	'1D8	Failure Replicated	18927	19030
FOSL1	'1E3	Failure Replicated	18937	19040
FOXA3	'2A9	Failure Replicated	18315	18754
FOXL2	'1B4	Failure Replicated	17458	18680
FOXP4	'1G7	Failure Replicated	18287	18726
GBX1	'2B3	Failure Replicated	22185	26439-28229
HDAC6	'1D9	Failure Replicated	17477	18699
HDAC8	'2C8	Failure Replicated	17452	18674
HES1	'1B11	Failure Replicated	18954	19057
HHEX	'2B6	Failure Replicated	17449	18671
HINFP	'1A1	Failure Replicated	17491	18713
HMG20B	'1B5	Failure Replicated	18931	19034
HOXB6	'1A4	Failure Replicated	18942	19045
ID3	'2H2	Failure Replicated	18959	19062
JAZF1	'1B8	Failure Replicated	18620	22594-23041
LHX2	'2D12	Failure Replicated	18364	26307-28254
LIN28A	'1E2	Failure Replicated	17456	18678
MAFF	'1A8	Failure Replicated	18956	19059
MAZ	'1D5	Failure Replicated	17493	18715
MED1	'1A11	Failure Replicated	18938	19041
MEF2A	'1B7	Failure Replicated	18936	19039
NACC1	'1A8	Failure Replicated	18961	19064
NCOA1	'1E8	Failure Replicated	17486	18708
NFATC3	'2A12	Failure Replicated	17469	18691
NFE2L2	'3D2	Failure Replicated	18286	18725
NFIL3	'2B5	Failure Replicated	18290	18729
NFIX	'3B4	Failure Replicated	18965	19068
NR5A2	'1B2	Failure Replicated	18933	19036
PAX3	'1B3	Failure Replicated	18291	18730
PAX5	'1B7	Failure Replicated	18289	18728
PHF10	'2A10	Failure Replicated	18321	18760
POU5F1	'1D9	Failure Replicated	18281	18720
PPARD	'2C10	Failure Replicated	18614	22617-23057
PRDM7	'3D3	Failure Replicated	17382	17399
PUM1	'1C3	Failure Replicated	18304	18743
QKI	'2F10	Failure Replicated	22189	26449-28232
SCXA	'1D2	Failure Replicated	23550	26437
SMAD2	'1C12	Failure Replicated	18941	19044
SMAD4	'1G12	Failure Replicated	18971	19074
SMARCB1	'2C4	Failure Replicated	18292	18731
SNAI3	'1G2	Failure Replicated	17471	18693
SOHLH1	'2D12	Failure Replicated	17484	18706
SOX12	'1E4	Failure Replicated	18283	18722
SOX5	'1C12	Failure Replicated	17463	18685
SOX9	'1A2	Failure Replicated	18295	18734
STAT3	'2E3	Failure Replicated	17467	18689
TEAD4	'1G7	Failure Replicated	18282	18721
TERF2	'1G5	Failure Replicated	17473	18695
TFAP2A	'1C6	Failure Replicated	18957	19060
THRB	'1A6	Failure Replicated	17483	18705
TOX3	'1A6	Failure Replicated	18294	18733
VENTX	'2B9	Failure Replicated	17459	18681
ZBED3	'2D9	Failure Replicated	18288	18727
ZBTB22	'1F7	Failure Replicated	18298	18737
ZBTB5	'1B3	Failure Replicated	17464	18686
ZCCHC7	'1A3	Failure Replicated	18293	18732
ZFYVE20	'2E3	Failure Replicated	22211-22798	26441-28230
ZIC1	'1E3	Failure Replicated	17384	17401
ZNF174	'1D12	Failure Replicated	17481	18703
ZNF239	'2F6	Failure Replicated	18393	26309-28256
ZNF277	'1A2	Failure Replicated	17451	18673
ZNF438	'1A11	Failure Replicated	18939	19042
ZNF444	'1E11	Failure Replicated	18308	18747
ZNF446	'3C8	Failure Replicated	18940	19043
ZNF583	'1E5	Failure Replicated	18955	19058
ZNF701	'1C5	Failure Replicated	17494	18716
ZNF792	'2C6	Failure Replicated	17454	18676
ZSCAN2	'2D7	Failure Replicated	18962	19065
ZUFSP	'1C12	Failure Replicated	17461	18683
FOXM1	'2E6	Not replicated	15400	16630	16662	18092	18100	18108	18116
PAX2	'1A7	Not replicated	15397	18094	18103	18110	18119
TP73	'1A8	Not replicated	15414	18096	18104	18112	18120
YY1	'1C2	Not replicated	15398	16656	16664	18106	18122
ATF2	'1B4	Not replicated	15401	16627	16659	22948
HSF1	'1D11	Not replicated	22597	28400	28404	28408
ATRX	'1E4	Not replicated	18953	19056	26296
GLI1	'1E6	Not replicated	18947	19050	26149
KLF16	'2E5	Not replicated	18928	19031	26317-28258
MEIS2	'2B4	Not replicated	18948	19051	26293
PBX1	'3C8	Not replicated	18972	19075	26148
PCGF3	'1D5	Not replicated	18318	18757	22959
PRRX2	'1G11	Not replicated	18934	19037	26294-28251
STAT5A	'1A11	Not replicated	15411	22200-22790	26155-28310
TFCP2	'3B1	Not replicated	17479	18701	26312
ZEB2	'2A11	Not replicated	17482	18704	26290-28249
ZNF574	'1G10	Not replicated	18944	19047	26291-28250
ZXDC	'2B5	Not replicated	18296	18735
ZXDC	'3D1	Not replicated	22198	26457
BATF2	'2B9	Not replicated	18391	26286
BCL6	'1D3	Not replicated	18301	18740
CEBPB	'3D10	Not replicated	18284	18723
CIZ1	'1A2	Not replicated	18367	26311
CTBP1	'1A1	Not replicated	18932	19035
DCP2	'1D6	Not replicated	18366	26300
DDIT3	'1D10	Not replicated	17470	18692
DDX43	'1E7	Not replicated	24063-24403	26295-28252
EHMT2	'3D9	Not replicated	18400	26299
FOXM1	'1H4	Not replicated	22860	26463-28237
GRAMD4	'1A6	Not replicated	23845	26432
GRHL1	'1B6	Not replicated	23778-24103	26444
HDGF	'1F2	Not replicated	17468	18690
HMGA1	'1C3	Not replicated	18970	19073
HOXC8	'1D3	Not replicated	18969	19072
LCORL	'1H11	Not replicated	24052	26321
LEUTX	'1B8	Not replicated	23579-23932	26435
MAFG	'1H7	Not replicated	18374	26310
MLLT3	'2B6	Not replicated	18365	26313
MLXIP	'1A10	Not replicated	23522-23893	26434
MYCL1	'2D5	Not replicated	22969	22971
NFKB2	'1E1	Not replicated	18370	26306
NFX1	'1A4	Not replicated	17475	18697
NFYC	'1A11	Not replicated	24027	26327
NKX2-5	'3F2	Not replicated	19005	22883-23332
NMI	'1C1	Not replicated	18390	26285
NPM3	'1D5	Not replicated	18401	26308-28255
PROX2	'1E1	Not replicated	19013	26284
RARB	'1E7	Not replicated	18968	19071
SHARPIN	'1A8	Not replicated	18951	19054
SIRT2	'1A2	Not replicated	23527-23898	26465-28238
SMAD3	'1A2	Not replicated	18946	19049
STAT5B	'3E9	Not replicated	22208	26156-28311
SYAP1	'2B8	Not replicated	19127	26443
T	'1A2	Not replicated	23531-23902	26454
TADA2A	'3C4	Not replicated	23501-23872	26460-28235
TAX1BP1	'1D4	Not replicated	18930	19033
TFAP2A	'2C2	Not replicated	23533-23904	26431
TGIF1	'2G6	Not replicated	15412	23525-23896
THAP9	'2B3	Not replicated	23791-24116	26433
ZBTB18	'1B2	Not replicated	18967	19070
ZIC2	'2A2	Not replicated	17492	18714
ZKSCAN2	'1G10	Not replicated	17450	18672
ZNF296	'1D6	Not replicated	23853-24500	26445
ZNF358	'1A6	Not replicated	24048	26322
ZNF581	'1A12	Not replicated	23855-24501	26450-28233
ZNF800	'2C12	Not replicated	23859	26426
ZNFX1	'1E6	Not replicated	22859	26456
DNMT3A	'1E2	Not replicated	18300	18739
GTF2A1	'1F2	Not replicated	17474	18696
HLF	'1C5	Not replicated	18309	18748
HMGB1	'4F10	Not replicated	17385	17402
ID1	'1E5	Not replicated	18280	18719
ID2	'1A8	Not replicated	18305	18744
ING1	'1C2	Not replicated	18311	18750
KLF7	'1C11	Not replicated	22625	26462
MXD4	'2B6	Not replicated	23587	26458
MYCL1	'2E1	Not replicated	19153	26455
MZF1	'1E8	Not replicated	17455	18677
NACC1	'1A1	Not replicated	23532-23903	26451
NFE2L2	'1D12	Not replicated	15408	22851-23321
NR2C1	'2C3	Not replicated	18302	18741
PLAG1	'1F5	Not replicated	18310	18749
PROX1	'1A6	Not replicated	18307	18746
RFX3	'1D11	Not replicated	18313	18752
RXRG	'5G6	Not replicated	18629	28261
SFMBT2	'1B7	Not replicated	18324	18763
SIRT2	'1A8	Not replicated	18945	19048
SMAD7	'1D7	Not replicated	18319	18758
SMAD9	'2F4	Not replicated	18317	18756
T	'1A5	Not replicated	18323	18762
TCEAL8	'1C4	Not replicated	22615	26324
YBX1	'1A8	Not replicated	17480	18702
ZBTB14	'1B12	Not replicated	22207	26428
ZKSCAN1	'1F10	Not replicated	18320	18759
ZKSCAN2	'2C6	Not replicated	22220-22807	26442-28231
ZMYM3	'2B9	Not replicated	26430	22884-23333
ZNF189	'3C5	Not replicated	19162	26452
ZNF24	'1G5	Not replicated	23769-24094	26436
ZNF335	'2C1	Not replicated	23538-23909	26464
ZNF354B	'1A8	Not replicated	23787-24112	26466-28239
ZNF385B	'1A1	Not replicated	24032-24387	26438-28228
ZNF410	'1D7	Not replicated	22182	26429
ZNF48	'1B9	Not replicated	24064	26314
ZNF556	'1G1	Not replicated	18325	18764
ZNF784	'1A4	Not replicated	18299	18738
ZZZ3	'1B11	Not replicated	22179-22777	26315-28257
HNF4A	'2A8	Not replicated - but motif found	18316	18755
ANAPC2	'3H3	Not replicated	22629-23058
ANAPC2	'3H7	Not replicated	18415
ANKHD1	'1B3	Not replicated	19138-19537
ANKZF1	'1C6	Not replicated	23801-24126
ARID2	'1A1	Not replicated	18980
ARNT	'2D11	Not replicated	22218-22805
ARNT2	'1A3	Not replicated	22193-22785
ARNTL	'1C12	Not replicated	18431
ASCL4	'2G8	Not replicated	23516-23887
ASF1A	'1H3	Not replicated	18371
ATAD2	'2D9	Not replicated	18445
ATF7	'2C10	Not replicated	18384
BACH1	'2G3	Not replicated	22627
BACH2	'1E4	Not replicated	23502-23873
BATF	'1C10	Not replicated	22882
BATF	'1E10	Not replicated	18394
BATF3	'1H3	Not replicated	23767-24092
BBX	'2F6	Not replicated	22188
BCL11A	'1G10	Not replicated	18641
BCL6	'1B1	Not replicated	23580-23933
BHLHA9	'1D1	Not replicated	24036
BMI1	'1G9	Not replicated	22964-23078
BMI1	'1H1	Not replicated	18991
BOLA3	'1A5	Not replicated	19090-19600
BRD1	'1B5	Not replicated	22861
BRD1	'2H2	Not replicated	18416
BRD9	'1H8	Not replicated	18440
BRPF1	'1E2	Not replicated	22937
BRPF1	'2E11	Not replicated	19108-19616
BRWD1	'1E12	Not replicated	22845
BRWD1	'2C12	Not replicated	18411
BSX	'4D10	Not replicated	18643
BSX	'5H1	Not replicated	23564-23923
CASP8AP2	'1D6	Not replicated	23582-23934
CASP8AP2	'2A5	Not replicated	18397
CBFB	'1C5	Not replicated	18380
CBFB	'3B9	Not replicated	22949-23068
CBX1	'1A4	Not replicated	18438
CBX2	'2B10	Not replicated	19150-19545
CBX3	'2E1	Not replicated	18372
CBX5	'2A7	Not replicated	18398
CBX5	'2D8	Not replicated	23584-23936
CC2D1A	'1C2	Not replicated	23806-24131
CDX2	'1A3	Not replicated	18618
CDX2	'1A6	Not replicated	22983
CEBPB	'2A12	Not replicated	22610-23054
CEBPE	'1B2	Not replicated	22623
CELF4	'1C3	Not replicated	19094-19603
CELF6	'1A4	Not replicated	19109-19617
CHEK2	'1A9	Not replicated	23782-24107
COPS3	'2D9	Not replicated	18386
CREB3L1	'1B1	Not replicated	18363
CREB3L4	'1E4	Not replicated	24060-24401
CREB5	'1G8	Not replicated	22616
CREBL2	'1A11	Not replicated	22863-23325
CSTF2	'1A11	Not replicated	22847
CSTF2T	'1A3	Not replicated	23815
CTBP1	'1A4	Not replicated	22866
CTBP2	'2C7	Not replicated	18975
CTBP2	'2D11	Not replicated	23790-24115
CXXC1	'1C7	Not replicated	22951-23070
DACH1	'1C9	Not replicated	18451
DAXX	'6E9	Not replicated	22879
DBX2	'1E4	Not replicated	23565-23924
DDIT3	'1A10	Not replicated	22858
DDX41	'1B4	Not replicated	23835
DDX58	'3D8	Not replicated	19088-19599
DGCR8	'1A1	Not replicated	19139-19538
DIS3	'1A7	Not replicated	18383
DIS3	'1D7	Not replicated	23534-23905
DLX3	'2C4	Not replicated	19020
DMRT2	'1B11	Not replicated	22872
DMRTB1	'1B3	Not replicated	23500-23871
DMTF1	'1B7	Not replicated	22968
DPF1	'1B6	Not replicated	22864
DPRX	'2F5	Not replicated	18622
DPRX	'3A1	Not replicated	22943
DRGX	'3F1	Not replicated	17443-22051
DVL2	'1A4	Not replicated	23539-23910
DVL2	'1C7	Not replicated	18433
DVL3	'1B10	Not replicated	23817-24485
DVL3	'2E12	Not replicated	19082-19596
E2F6	'1F6	Not replicated	22606-23051
E2F8	'1G6	Not replicated	23824
E4F1	'2D1	Not replicated	23768-24093
EBF1	'1B1	Not replicated	18651
ECD	'1D10	Not replicated	22952
EDF1	'1A3	Not replicated	18420
EEA1	'1F8	Not replicated	18453
EEA1	'2H11	Not replicated	23513-23884
EIF2S1	'1C11	Not replicated	22620
EIF2S1	'1E2	Not replicated	17404
EIF4A2	'2B5	Not replicated	18454
EIF4A3	'3A2	Not replicated	18442
EIF4E	'1D3	Not replicated	19159
ELF1	'1A3	Not replicated	22216-22803
ELF1	'1C9	Not replicated	18410
ELF2	'5A5	Not replicated	23547-23917
ERG	'2C6	Not replicated	22589-23037
ESR1	'1A12	Not replicated	17413
ESRP2	'1D2	Not replicated	22184
ESRRB	'2A6	Not replicated	18404
ESRRG	'3A6	Not replicated	19160-19549
ETS1	'1F1	Not replicated	22880-23330
ETS2	'1D9	Not replicated	23544-23914
ETV6	'1A7	Not replicated	18437
ETV6	'1A9	Not replicated	22214-22801
ETV7	'1A1	Not replicated	22841
ETV7	'1A6	Not replicated	18621
FEZF2	'1B1	Not replicated	22852-23322
FLI1	'4H6	Not replicated	18987
FOSB	'1C9	Not replicated	22963-23077
FOSL1	'1G1	Not replicated	23826
FOSL2	'1B1	Not replicated	17432-22040
FOXA2	'3A2	Not replicated	19146-19542
FOXB2	'2B2	Not replicated	19018
FOXC2	'1B1	Not replicated	19142-19540
FOXC2	'1B6	Not replicated	23583-23935
FOXI1	'1F8	Not replicated	17430-22038
FOXJ2	'1D3	Not replicated	17406
FOXL1	'2B4	Not replicated	18646
FOXN1	'2B8	Not replicated	22634-23061
FOXN1	'2C1	Not replicated	18624
FOXO3	'1B7	Not replicated	22965-23079
FOXO3	'1G5	Not replicated	19165-19551
FOXP3	'1B2	Not replicated	17444-22052
FOXP4	'1D1	Not replicated	22222-22809
FOXR1	'1F8	Not replicated	19170-19556
G3BP2	'1C7	Not replicated	19087
GABPB1	'1A2	Not replicated	18452
GBX1	'2F8	Not replicated	18612
GCM2	'1B3	Not replicated	18625
GLI1	'1A1	Not replicated	22183
GLIS3	'1B11	Not replicated	22178-22776
GMEB1	'1C1	Not replicated	23818
GMEB2	'1C6	Not replicated	24029-24385
GRHL1	'1F9	Not replicated	17411
GRHL2	'2B9	Not replicated	18303
GTF2B	'1D1	Not replicated	19101-19610
GTF2B	'1H2	Not replicated	22947
GTF2E1	'2C12	Not replicated	19130
GTF2H1	'1A10	Not replicated	19123-19623
GTF2H2	'1B9	Not replicated	23512-23883
GTF2I	'1A7	Not replicated	17428
GTF2I	'1B10	Not replicated	23846
GTF2IRD2	'1B4	Not replicated	23848-24497
HAND1	'1D5	Not replicated	23578
HAND1	'2A9	Not replicated	18650
HAND2	'1C6	Not replicated	19137-19536
HDAC1	'2E12	Not replicated	19148-19544
HDAC10	'1B2	Not replicated	19131
HDAC6	'1A4	Not replicated	23503-23874
HDAC7	'1A3	Not replicated	19016
HDAC8	'2A3	Not replicated	22850-23320
HDGF	'1D1	Not replicated	24028
HDGFL1	'1A11	Not replicated	23851-24499
HDGFRP2	'3C4	Not replicated	19157
HELLS	'2A3	Not replicated	18436
HES1	'2E8	Not replicated	22941-23066
HES3	'1A10	Not replicated	19001
HESX1	'1A11	Not replicated	22201-22791
HEY2	'1H7	Not replicated	22976-23083
HEY2	'3A7	Not replicated	17436-22044
HEYL	'1G9	Not replicated	19151
HHEX	'1H3	Not replicated	22604-23049
HIF3A	'1C6	Not replicated	23499-23870
HMGA1	'1B6	Not replicated	23560-23920
HMGB1	'2G1	Not replicated	22206-22796
HMGN1	'1B2	Not replicated	23812-24137
HMGN1	'1G10	Not replicated	17442-22050
HMGN5	'2E6	Not replicated	24059
HMGXB4	'1B3	Not replicated	23497-23868
HMGXB4	'3F4	Not replicated	19126
HMX3	'4E5	Not replicated	24022-24384
HOMEZ	'1B5	Not replicated	24025
HOPX	'1A1	Not replicated	22857
HOPX	'1A5	Not replicated	19171-19557
HOXB2	'1C9	Not replicated	23498-23869
HOXB5	'1C3	Not replicated	18656
HOXD9	'1A4	Not replicated	18635
HSF2	'2C1	Not replicated	15404
HSF5	'1A1	Not replicated	18999
ID1	'2F11	Not replicated	22197-22788
ID3	'2C8	Not replicated	23526-23897
ID4	'1B8	Not replicated	17415-22026
ID4	'3C6	Not replicated	22599-23045
IGF2BP1	'2D4	Not replicated	18385
IKZF1	'1B8	Not replicated	19118-19618
ING4	'3B3	Not replicated	18435
INSM1	'1A6	Not replicated	18652
IRF2	'1A4	Not replicated	18379
IRF2	'1B2	Not replicated	23558
IRF3	'1G7	Not replicated	22621
IRF3	'6C8	Not replicated	15405
IRF4	'1A5	Not replicated	23783-24108
IRF9	'2B7	Not replicated	22626
IRX2	'1B7	Not replicated	19091-19601
IRX2	'1C1	Not replicated	23543
IRX5	'1B4	Not replicated	23520-23891
IRX5	'1C11	Not replicated	17420-22031
ISL1	'1A9	Not replicated	17419-22030
ISL1	'1C2	Not replicated	22842
JUNB	'3G11	Not replicated	22958
JUNB	'3G2	Not replicated	19081
JUP	'1B1	Not replicated	19115
KBTBD10	'4B8	Not replicated	19085
KCMF1	'1H4	Not replicated	22867-23326
KDM1A	'1A10	Not replicated	23537-23908
KDM1A	'1B2	Not replicated	18368
KDM8	'1A2	Not replicated	18403
KHDRBS1	'2E2	Not replicated	18432
KHDRBS3	'1D3	Not replicated	23836-24492
KIAA1967	'1D10	Not replicated	24034
KLF1	'1C6	Not replicated	15406
KLF1	'2C4	Not replicated	23524-23895
KLF10	'1D6	Not replicated	22600-23046
KLF12	'1E3	Not replicated	24023
KLF14	'1C12	Not replicated	22973-23081
KLF14	'1H1	Not replicated	18623
KLF15	'1H1	Not replicated	23574
KLF15	'1H3	Not replicated	18642
KLF16	'1E9	Not replicated	22194-22786
KLF17	'2F4	Not replicated	24031-24386
KLF5	'1A3	Not replicated	22870
L3MBTL4	'4D1	Not replicated	23831
LCOR	'1B1	Not replicated	23794-24119
LDB1	'1C5	Not replicated	18376
LEUTX	'1B6	Not replicated	18648
LHX2	'2G5	Not replicated	22186-22780
LHX4	'1B6	Not replicated	22598-23044
LHX4	'1C11	Not replicated	17417-22028
LHX5	'1B7	Not replicated	22596-23043
LRRFIP1	'3A8	Not replicated	18978
MAFB	'1A10	Not replicated	17410
MAP3K7	'1B9	Not replicated	22855-23323
MAT2B	'1G7	Not replicated	19134-19533
MAT2B	'4B6	Not replicated	23496-23867
MBD2	'1B6	Not replicated	22966
MBNL3	'1D11	Not replicated	19128-19532
MED1	'1A9	Not replicated	22875
MED21	'4B5	Not replicated	22180-22778
MED4	'1A6	Not replicated	19116
MED6	'3D10	Not replicated	18427
MED7	'1B8	Not replicated	18977
MED8	'1A4	Not replicated	19105-19614
MEF2A	'1F7	Not replicated	22609-23053
MEF2B	'2A11	Not replicated	18638
MEF2B	'2F9	Not replicated	22982
MEF2C	'1D4	Not replicated	18377
MEIS2	'1A11	Not replicated	22624
MEIS3	'1A10	Not replicated	23562-23921
MESP1	'1D11	Not replicated	18636
MESP2	'1D4	Not replicated	19152-19546
METTL21A	'2D2	Not replicated	18988
MINA	'1D1	Not replicated	23825-24490
MIS18BP1	'1B10	Not replicated	22940-23065
MITF	'1D9	Not replicated	18655
MLLT10	'1C10	Not replicated	18387
MLLT10	'1D4	Not replicated	22938-23064
MLX	'1G8	Not replicated	22939
MORF4L1	'1G12	Not replicated	18412
MXI1	'1A3	Not replicated	22953
MYCN	'1A9	Not replicated	17429
MYCN	'2C7	Not replicated	23570-23928
MYO1B	'2B4	Not replicated	18981
MYOD1	'2A5	Not replicated	19113
MYOG	'1C5	Not replicated	17431-22039
NACC2	'4B7	Not replicated	24026
NANOGP1	'2D8	Not replicated	19140
NAP1L5	'1A7	Not replicated	22848
NCOA3	'1A11	Not replicated	23553-23919
NCOA3	'1B9	Not replicated	18414
NEDD4L	'2B4	Not replicated	22979-23085
NEUROD2	'1G1	Not replicated	18984
NEUROG3	'2A6	Not replicated	19010
NFATC1	'1A2	Not replicated	22199-22789
NFATC1	'1F4	Not replicated	15407
NFATC1	'7A6	Not replicated	15415
NFIA	'1B8	Not replicated	22950-23069
NFIX	'2D3	Not replicated	23556
NFKB1	'2B9	Not replicated	19110
NFKB2	'7H5	Not replicated	22876-23328
NFYB	'1A2	Not replicated	24046
NINJ2	'2B10	Not replicated	19169-19555
NKX3-1	'1E5	Not replicated	19161-19550
NPM1	'1B4	Not replicated	23523-23894
NR0B1	'1A10	Not replicated	22225-22811
NR1D1	'1D2	Not replicated	23832
NR1D1	'1F1	Not replicated	18645
NR1D2	'1B12	Not replicated	18444
NR1H2	'1D11	Not replicated	23495-23866
NR1H3	'1A1	Not replicated	18993
NR2C1	'2B12	Not replicated	22868-23327
NR2E3	'2B6	Not replicated	18654
NR2F1	'1D5	Not replicated	19132
NR2F2	'1G3	Not replicated	18455
NR3C2	'1A3	Not replicated	22219-22806
NR5A1	'1A4	Not replicated	19019
NR5A2	'1B8	Not replicated	22224
NRF1	'3D4	Not replicated	17445-22053
OBFC1	'1B4	Not replicated	18983
OLIG2	'1E9	Not replicated	19102-19611
ONECUT1	'1A1	Not replicated	18647
ONECUT2	'1A1	Not replicated	22619
ORC1	'1C4	Not replicated	18373
OTX2	'1E10	Not replicated	22978-23084
OTX2	'1F7	Not replicated	18632
OVOL2	'1H12	Not replicated	17424-22034
OVOL2	'2A1	Not replicated	22601-23047
PARP11	'1H1	Not replicated	23789-24114
PAWR	'1C3	Not replicated	19163
PAX5	'1B1	Not replicated	22878-23329
PAX9	'1G1	Not replicated	18448
PBX4	'1C11	Not replicated	22844-23318
PBX4	'1H1	Not replicated	19000
PCGF6	'1A2	Not replicated	19156
PDX1	'2C11	Not replicated	22970
PGBD1	'3C5	Not replicated	18382
PGBD1	'4C8	Not replicated	22960
PHF17	'1H6	Not replicated	23776-24101
PHF19	'2B8	Not replicated	19122-19622
PHF19	'2D9	Not replicated	23833
PHF21B	'1G3	Not replicated	23852
PHF7	'1A1	Not replicated	23551
PIKFYVE	'3C9	Not replicated	18418
PIKFYVE	'4G10	Not replicated	22602-23048
PKNOX2	'3C6	Not replicated	23506-23877
PLXNB1	'3A7	Not replicated	18989
PLXNB1	'3G4	Not replicated	22862-23324
POGZ	'1B2	Not replicated	19093
POLE3	'2B11	Not replicated	18428
POLE3	'3D3	Not replicated	23577-23931
POU3F2	'1A3	Not replicated	19096-19605
POU3F2	'3E6	Not replicated	23575-23929
POU5F1	'1D2	Not replicated	22209
POU6F1	'1A1	Not replicated	18617
PPARA	'2B9	Not replicated	18742
PPP1R10	'1A2	Not replicated	22630
PPP1R10	'1G12	Not replicated	18430
PPP1R13L	'2G4	Not replicated	22843
PPP5C	'1F7	Not replicated	19111
PPP5C	'1H9	Not replicated	22942-23067
PRDM1	'2B9	Not replicated	22853
PRDM13	'1D8	Not replicated	19107-19615
PRDM13	'2C12	Not replicated	23530-23901
PRDM16	'2B2	Not replicated	19099-19608
PRDM2	'2A1	Not replicated	18421
PRDM2	'2A4	Not replicated	23536-23907
PRDM4	'2B3	Not replicated	17427-22037
PRDM4	'2D1	Not replicated	22980-23086
PRDM5	'1H5	Not replicated	19106
PRDM7	'3F10	Not replicated	23772-24097
PRDM8	'1A1	Not replicated	18644
PRKRA	'3A4	Not replicated	22877
PRMT6	'2C9	Not replicated	23802-24127
PRMT7	'1A4	Not replicated	22840-23317
PROX2	'1F5	Not replicated	23771-24096
PRRX2	'4F12	Not replicated	22223-22810
PUM2	'1B11	Not replicated	23510-23881
RAX	'1B4	Not replicated	22846
RAX	'1C8	Not replicated	18633
RBBP5	'1C3	Not replicated	19147-19543
RBMS2	'1B2	Not replicated	24045-24393
RCOR2	'3F4	Not replicated	23511-23882
RCOR3	'1B2	Not replicated	23535-23906
RELA	'1E3	Not replicated	18628
RELA	'2B6	Not replicated	22981
RELB	'1B1	Not replicated	18619
RFX2	'1A11	Not replicated	22622
RFX5	'1E5	Not replicated	23811-24136
RFX6	'1B12	Not replicated	23559
RFX6	'3D3	Not replicated	17438-22046
RFXANK	'1A9	Not replicated	19129
RGCC	'2C4	Not replicated	19154-19547
RHOXF2	'1D7	Not replicated	24054
RNF113B	'2F4	Not replicated	22595-23042
RNF113B	'3D10	Not replicated	18990
RNF2	'1D4	Not replicated	19164
RNF20	'1D7	Not replicated	18446
RORA	'2C2	Not replicated	18631
RPRD1A	'1D9	Not replicated	23816
RPS6KA5	'1A8	Not replicated	18422
RPS6KA5	'1F10	Not replicated	23804-24129
RUNX1	'3D7	Not replicated	19114
RUNX2	'1B7	Not replicated	17441-22049
RUNX2	'1B9	Not replicated	23569
RUVBL1	'1A1	Not replicated	17440-22048
RXRA	'2A8	Not replicated	17416-22027
RXRB	'2B6	Not replicated	19143
RXRG	'5C9	Not replicated	22874
SAMD4B	'1H3	Not replicated	22977
SAMD4B	'2A6	Not replicated	19098-19607
SATB1	'3B6	Not replicated	22881-23331
SATB1	'3H2	Not replicated	18630
SCAND1	'3D11	Not replicated	24044
SCAND3	'1C2	Not replicated	19136-19535
SCAND3	'1D9	Not replicated	23770-24095
SCML2	'1D12	Not replicated	23517-23888
SCML4	'1D6	Not replicated	23585
SCRT1	'1B1	Not replicated	24061-24402
SCXA	'2D11	Not replicated	19133
SET	'1C6	Not replicated	19145-19541
SETD6	'1E8	Not replicated	18381
SFMBT1	'2C1	Not replicated	23796-24121
SHARPIN	'1A5	Not replicated	24020
SHOX	'1A8	Not replicated	23803-24128
SIN3B	'1A9	Not replicated	23508-23879
SIRT1	'1E11	Not replicated	23521-23892
SIRT1	'1F6	Not replicated	18425
SIRT3	'1C10	Not replicated	18982
SIRT5	'1D4	Not replicated	19149
SIRT6	'1E2	Not replicated	19086-19598
SKIL	'1D1	Not replicated	24049
SLC25A24	'3G2	Not replicated	19095-19604
SLC30A9	'1C3	Not replicated	19167-19553
SMAD1	'1B12	Not replicated	17405
SMAD4	'1D12	Not replicated	23554
Smad4	'1H2	Not replicated	15409
SMARCAL1	'1G2	Not replicated	23494-23865
SMARCC1	'1F1	Not replicated	15410
SMARCC2	'1A3	Not replicated	23810-24135
SMARCC2	'7B6	Not replicated	17422
SMARCD1	'2B3	Not replicated	18439
SMARCD1	'2B5	Not replicated	23507-23878
SMARCE1	'1G7	Not replicated	22631-23059
SMARCE1	'2E9	Not replicated	18424
SMURF1	'1A10	Not replicated	22588-23036
SNAPC4	'1G11	Not replicated	22190-22782
SNW1	'1C12	Not replicated	23780-24105
SNW1	'2A1	Not replicated	18426
SOX10	'1D8	Not replicated	18378
SOX12	'1C4	Not replicated	22592-23039
SOX13	'1C4	Not replicated	17407
SOX2	'1B3	Not replicated	17433-22041
SOX3	'1A1	Not replicated	17434-22042
SOX4	'3B5	Not replicated	22873
SOX4	'3F12	Not replicated	17421-22032
SOX8	'1F4	Not replicated	19083-19597
SOX9	'1E5	Not replicated	23545-23915
SP110	'1D9	Not replicated	23786-24111
SP140	'1G12	Not replicated	22210-22797
SP140	'3G1	Not replicated	18362
SP5	'2A5	Not replicated	22954-23071
SPIC	'2C11	Not replicated	22614
SRF	'1F1	Not replicated	18985
SRF	'1F7	Not replicated	23542
SRRT	'1F5	Not replicated	18417
SRY	'1D10	Not replicated	19121-19621
SRY	'1D7	Not replicated	23505-23876
SSBP4	'3B5	Not replicated	19112
STAT1	'3D6	Not replicated	18429
STAT1	'4H11	Not replicated	22972-23080
STAT2	'1E5	Not replicated	22632-23060
STAT2	'2B9	Not replicated	18615
STAT4	'2A2	Not replicated	18649
STAT6	'1C6	Not replicated	18979
TADA2B	'11A3	Not replicated	23563-23922
TADA3	'1F3	Not replicated	22205-22795
TAF10	'1A2	Not replicated	23588
TARBP2	'1B9	Not replicated	23821
TAX1BP1	'1D8	Not replicated	22221-22808
TBX19	'2A12	Not replicated	22849-23319
TBX4	'1B11	Not replicated	19117
TCF25	'1F12	Not replicated	23589-23938
TDRKH	'1H2	Not replicated	19104-19613
TEAD3	'1A4	Not replicated	18998
TEAD4	'2F4	Not replicated	22613
TERF1	'1E5	Not replicated	17435-22043
TERF2IP	'1B6	Not replicated	18450
TFAP2B	'2A4	Not replicated	18616
TFAP2B	'2E1	Not replicated	23555
TFAP2C	'1A7	Not replicated	17409
TFAP2C	'1B9	Not replicated	22957-23074
TFAP2D	'1A11	Not replicated	22975
TFAP2D	'1A12	Not replicated	18637
TGIF2LX	'1H4	Not replicated	18653
THAP10	'3A9	Not replicated	24024
THRA	'1F10	Not replicated	18657
TOX3	'1A5	Not replicated	22633
TP53	'1D9	Not replicated	23515-23886
TP53	'1F7	Not replicated	17403
TRDMT1	'1E8	Not replicated	23819-24486
TRIM24	'1B12	Not replicated	22191-22783
TRIM27	'1B3	Not replicated	18396
TRIM28	'2G5	Not replicated	19079-19594
TRIM28	'2G8	Not replicated	22603
TSC22D3	'1G10	Not replicated	23572
TSC22D4	'3E10	Not replicated	18994
TSC22D4	'4A4	Not replicated	23576-23930
U2AF1	'1A8	Not replicated	19084
UBE2B	'1C7	Not replicated	22871
UBE3A	'1A2	Not replicated	22593-23040
UBQLN2	'1C7	Not replicated	19119-19619
UBR2	'1D12	Not replicated	19103-19612
USF1	'1C10	Not replicated	22587-23035
USP16	'1B2	Not replicated	23586-23937
USP7	'1B6	Not replicated	19141-19539
VDR	'1F11	Not replicated	19155-19548
VENTX	'2A9	Not replicated	23557
WDHD1	'1B10	Not replicated	24042-24392
WDR5	'1F5	Not replicated	18434
WHSC1	'2A1	Not replicated	17425-22035
WHSC1	'2A11	Not replicated	22192-22784
YBX2	'1C2	Not replicated	22945
YBX2	'1D8	Not replicated	18423
YBX3	'1D8	Not replicated	23809-24134
YBX3	'2D12	Not replicated	18995
YEATS2	'1B3	Not replicated	18395
YEATS4	'1D2	Not replicated	22955-23072
YY2	'1A8	Not replicated	17437-22045
ZBED1	'1E1	Not replicated	23788-24113
ZBTB16	'1B7	Not replicated	19012
ZBTB17	'1D3	Not replicated	19158
ZBTB2	'46F2	Not replicated	17439-22047
ZBTB22	'1A2	Not replicated	22869
ZBTB24	'1E9	Not replicated	18419
ZBTB25	'1B10	Not replicated	18447
ZBTB25	'1D12	Not replicated	23504-23875
ZBTB3	'2B2	Not replicated	19097-19606
ZBTB32	'2A7	Not replicated	19135-19534
ZBTB37	'1G10	Not replicated	18389
ZBTB39	'1A11	Not replicated	23552
ZBTB46	'1D1	Not replicated	18634
ZBTB46	'2C1	Not replicated	24050-24395
ZBTB48	'3C4	Not replicated	19089
ZBTB5	'1C4	Not replicated	22984-23087
ZBTB7B	'1F7	Not replicated	23800-24125
ZBTB7C	'2B11	Not replicated	23573
ZC3H15	'1D1	Not replicated	23777-24102
ZC3H7A	'2G9	Not replicated	24038
ZEB2	'1C6	Not replicated	23548-23918
ZFP28	'2B8	Not replicated	23842-24496
ZFP3	'1A5	Not replicated	24057-24399
ZFP41	'1A1	Not replicated	19008
ZFP90	'1C5	Not replicated	19004
ZFP92	'2B9	Not replicated	23862
ZFPM2	'2D5	Not replicated	18639
ZFYVE19	'3C5	Not replicated	19168-19554
ZFYVE20	'1C3	Not replicated	19080-19595
ZHX2	'1B2	Not replicated	23805-24130
ZHX3	'1G3	Not replicated	23792-24117
ZIM2	'1D10	Not replicated	23795-24120
ZKSCAN3	'1E8	Not replicated	22181-22779
ZKSCAN3	'2A4	Not replicated	18613
ZKSCAN7	'1C4	Not replicated	24065
ZMAT2	'1E5	Not replicated	18441
ZMAT4	'1A6	Not replicated	24030
ZNF134	'1A2	Not replicated	18413
ZNF134	'3E11	Not replicated	23779-24104
ZNF140	'5C1	Not replicated	19166
ZNF155	'1A5	Not replicated	24021
ZNF157	'1A8	Not replicated	23774-24099
ZNF165	'2D3	Not replicated	18443
ZNF165	'2F4	Not replicated	23568-23927
ZNF169	'1A4	Not replicated	19100-19609
ZNF18	'4B5	Not replicated	22591-23038
ZNF192	'1F10	Not replicated	19006
ZNF197	'2D1	Not replicated	18405
ZNF200	'1A3	Not replicated	22865
ZNF202	'1C4	Not replicated	22618
ZNF202	'3G1	Not replicated	18369
ZNF207	'2D8	Not replicated	23854
ZNF212	'1A3	Not replicated	24051-24396
ZNF217	'1G2	Not replicated	23808-24133
ZNF217	'5H9	Not replicated	17426-22036
ZNF222	'2C5	Not replicated	18449
ZNF23	'2A2	Not replicated	23546-23916
ZNF23	'2A5	Not replicated	19011
ZNF230	'1E1	Not replicated	19003
ZNF230	'4B6	Not replicated	23528-23899
ZNF232	'1B10	Not replicated	18392
ZNF232	'1D5	Not replicated	23841
ZNF239	'2A10	Not replicated	23529-23900
ZNF263	'1C11	Not replicated	17408
ZNF264	'1D5	Not replicated	19002
ZNF264	'1H4	Not replicated	23519-23890
ZNF277	'1E10	Not replicated	22956-23073
ZNF280A	'1C4	Not replicated	23781-24106
ZNF280D	'1D11	Not replicated	24058-24400
ZNF324	'1B9	Not replicated	24039-24390
ZNF333	'1H4	Not replicated	23834
ZNF334	'1B3	Not replicated	23858-24502
ZNF341	'3B10	Not replicated	23844
ZNF354A	'1B6	Not replicated	17418-22029
ZNF354A	'1D7	Not replicated	23843
ZNF384	'1E8	Not replicated	18976
ZNF397	'2F6	Not replicated	18388
ZNF408	'1F6	Not replicated	23797-24122
ZNF428	'1D6	Not replicated	23785-24110
ZNF446	'2C7	Not replicated	22607
ZNF467	'2H7	Not replicated	17412
ZNF483	'1C11	Not replicated	23798-24123
ZNF485	'1G1	Not replicated	23861
ZNF488	'1B6	Not replicated	23820-24487
ZNF496	'1C1	Not replicated	18997
ZNF496	'1C5	Not replicated	23822-24488
ZNF503	'1B7	Not replicated	22590
ZNF524	'2B4	Not replicated	18627
ZNF526	'2A4	Not replicated	23793-24118
ZNF548	'1E11	Not replicated	24053-24397
ZNF549	'2A2	Not replicated	24047-24394
ZNF550	'1B4	Not replicated	23775-24100
ZNF556	'1C3	Not replicated	23828
ZNF570	'1B3	Not replicated	23823-24489
ZNF574	'2A9	Not replicated	24035
ZNF584	'1E10	Not replicated	18407
ZNF585B	'1D8	Not replicated	23807-24132
ZNF597	'1C4	Not replicated	23784-24109
ZNF598	'1A12	Not replicated	22967
ZNF608	'1A10	Not replicated	18640
ZNF623	'2C3	Not replicated	24040
ZNF639	'1E7	Not replicated	22215-22802
ZNF648	'1C5	Not replicated	23799-24124
ZNF654	'1C7	Not replicated	18399
ZNF654	'1G11	Not replicated	23838
ZNF683	'1E4	Not replicated	23857
ZNF689	'1A4	Not replicated	24041-24391
ZNF696	'1D7	Not replicated	18402
ZNF697	'1A8	Not replicated	18626
ZNF7	'1C12	Not replicated	24033-24388
ZNF704	'3C10	Not replicated	22854
ZNF746	'1B7	Not replicated	19007
ZNF746	'1D7	Not replicated	24043
ZNF75A	'1E5	Not replicated	23518-23889
ZNF770	'1D7	Not replicated	19014
ZNF783	'2A8	Not replicated	23849-24498
ZNF8	'1B7	Not replicated	22187-22781
ZNF804A	'1H8	Not replicated	19120-19620
ZNF830	'1C5	Not replicated	24055-24398
ZNF846	'1F9	Not replicated	23773-24098
ZNF98	'1A11	Not replicated	23847
ZNFX1	'1D3	Not replicated	19092-19602
ZSCAN12	'1A9	Not replicated	19017
ZSCAN2	'1G6	Not replicated	23514-23885
ZSCAN21	'1B2	Not replicated	18996
ZSCAN22	'1A12	Not replicated	19009
ZSCAN23	'3G2	Not replicated	18986
ZSCAN25	'1A6	Not replicated	18406
ZSCAN26	'1F12	Not replicated	18375
ZSCAN5A	'1G7	Not replicated	19078-19593
ZSCAN5A	'2B5	Not replicated	22839
ZUFSP	'1A2	Not replicated	22946
