# Supplementary material for: A ChIP-exo screen of 887 Protein Capture Reagents Program transcription factor antibodies in human cells
Source: HighWire-hosted journal article supplement (doi:10.1101/gr.275472.121), 2021-08-23
Supplement: Supplemental_Table_S3.xlsx [file Supplemental_Table_S3.xlsx]

## Sheet: SuppTable1
Supplementary Table 1: ChIP-seq QC for PCRP antibodies tested inHCT116 cells
Qualitative Scores: 1 good, 2 signal but not validated, 3 insignificant signal or significant off-target
Target	Clone ID	Peak number replicate 1	Qualitative Score	Comment 1	Comment 2
BACH1	1A2	1251	1
HSF1	1A10	4172	1	Peaks called for the heat shock condition
HSF1	1A8	4451	1	Peaks called for the heat shock condition
HSF1	1A9	859	1	Peaks called for the heat shock condition
NRF1	3D4	843	1
NRF1	3H1	2104	1
PRDM4	2D1	25	1	Small number of peaks but retrieves known motif as #1
TEAD4	1G7	196	1
TEAD4	2F4	183	1
BACH1	2G3	46	2	retrieves motif but weak
FOS	1A7	41972	2	doesn't retrieve known motif, has unexpected elongating RNA Pol II profile
HSF1	1A6	35	2	Peaks called for the heat shock condition	retrieves motif but weak
MEN1	2B1		2	Peaks but doesn't retrieve known target genes
PRDM4	2B3	884	2	retrieves known motif but not as #1
PRDM4	2B4	197	2	retrieves known motif but not as #1
SMAD2	1B10	85083	2
SMARCC1	1F1	6286	2
SMARCC2	1A3	5520	2
WHSC1	2A1	302	2
BMI1	1G9		3
BMI1	1H1		3
BRD1	1B5		3
BRD1	2B7		3
BRD1	2H2		3
BRD3	1C12		3
BRD3	1D12		3
BRD9	1H8		3
BRPF1	1B2		3
BRPF1	1E2		3
BRPF1	wE11		3
BRWD1	1E12		3
BRWD1	2C12		3
CBX1	1A4		3
CBX3	2E1		3
CBX5	2A7		3
CBX5	2D8		3
CIZ1	1A2		3
CXXC1	1B6		3
CXXC1	1C7		3
CXXC1	1E5		3
CXXC1	2A1		3
CXXC1	2A7		3
CXXC1	2C3		3
CXXC1	2D3		3
DCP2	1D6		3
DNMT3A	1E2		3
DNMT3L	1E3		3
DPF1	1A4		3
DPF1	1A9		3
DPF1	1B3		3
DPF1	1B6		3
EZH2	1B3		3
GTF2F2	1B3		3
GTF2F2	1B4		3
GTF2H2C	2C9		3
GTF2H2	1B9		3
HMG20B	1B5		3
HSF1	1C1		3	Peaks called for the heat shock condition
HSF1	1D11		3	Peaks called for the heat shock condition
HSF2	2C1		3	Peaks called for the heat shock condition
JAZF1	1C2	94731	3	JAZF1 not expressed in HCT116 cells
KDM1A	1A10		3
KDM1A	1A4		3
KDM1A	1B2		3
LDB1	1C5		3
MED1	1A11		3
MED1	1A9		3
MED21	4B5		3
MED21	4F3		3
MED22	1E4		3
MED22	2A7		3
MED30	1B12		3
MED30	1C3		3
MED4	1A6		3
MED6	3D10		3
MED7	1B8		3
MED7	1C4		3
MED8	1A4		3
MED8	1B4		3
MED9	1D6		3
MEN1	1H6		3
MLLT10	1C10		3
MLLT10	1D4		3
MLLT3	2B6		3
NFE2L2	1D12		3
NFE2L2	3D2		3
NRF1	3H3		3
PCGF3	1B4		3
PCGF3	1D5		3
PCGF6	1A11		3
PCGF6	1A2		3
PRDM1	2B9		3
PRDM1	2C5		3
PRDM2	2A1		3
PRDM2	2A4		3
RCOR2	1E10		3
RCOR2	3F4		3
RCOR3	1B2		3
RCOR3	1B6		3
RNF20	1D7		3
SCML4	1D6		3
SCML4	1F9		3
SIRT1	1E11		3
SIRT1	1F6		3
SKIL	1D1		3
SMAD2	1C12		3
SMAD4	1C10		3
SMAD4	1D12		3
SMAD4	1D3		3
SMAD4	1G11		3
SMAD4	1G12		3
SMAD4	1H2		3
SMAD4	2A5		3
SMAD4	2B3		3
SMAD4	2D1		3
SMARCAL1	1C4		3
SMARCAL1	1G2		3
SMARCAL1	1G7		3
SMARCB1	2C4		3
SMARCC2	7B6		3
SMARCD1	2B3		3
SMARCD1	2B5		3
SMARCE1	1G7		3
SMARCE1	2E9		3
SMARCE1	2F1		3
SNAPC4	1G11		3
SNAPC4	3A7		3
TCEAL8	1C4		3
TEAD3	1A4		3
TRIM24	1B12		3
USP7	1B6		3
WHSC1	2A11		3
YEATS2	1B3		3
YEATS4	1D2		3
JAZF1	1A5		ND	JAZF1 not expressed in HCT116 cells
JAZF1	1B8		ND	JAZF1 not expressed in HCT116 cells
JAZF1	1C1		ND	JAZF1 not expressed in HCT116 cells
