# Supplementary material for: A ChIP-exo screen of 887 Protein Capture Reagents Program transcription factor antibodies in human cells
Source: HighWire-hosted journal article supplement (doi:10.1101/gr.275472.121), 2021-08-23
Supplement: Supplemental_Table_S4.xlsx [file Supplemental_Table_S4.xlsx]

## Sheet: SuppTable3
Supplemental Table 3: List of PCRP Antibodies validated by motif enrichment analysis in peaks from ChIP-based genomic assays.
Target TF = Transcription Factor used for the generation the antibody
Antibody DSHB ID = DSHB Antibody ID code for the considered target TF
Experiment type = Either ChIP-exo experiments from Pugh Lab or ChIP-seq experiments with and with target TF Knock-down from Shilatifard Lab
Cell Line = Cell line used for the ChIP experiment in
Experiment ID Entry = ID code for ChIP-exo exps. No code yet available for ChIP-seq exps
Target TF Expression level (TPM) = Expression level (as TPM) value of the Target TF in the indicated cell line. TPM values are averages of 2 ENCODE RNA-seq replicates
Peak Count = Number of called Peaks in the indicated ChIP experiment
Top Motif = Among a curated collection of 100 motifs represented as PWMs from CISBP, the motif (and CISBP ID) with the highest AUROC value for the indicated peak dataset
Motif Enrichment (AUROC) = AUROC value for the Top Motif in top 500 peaks of the indicated dataset
Motif distance to peak summit (bp) = Mean distance between best matches of the top motif and the associated peak summits
Type of Binding= The binding is labeled Cognate when the Top Motif is similar to the cognate motif recognized by the Target TF when binding specificity is assayed in vitros (PBM, Selex-seq, HT-Selex). Othersie, the binding is labeled non-cognate.
Qualitative Score: 1 = AUROC enriched cognate motif, 2 : Non-cognate motif or low AUROC score, needs further experimental validation
Target TF	Antibody DSHB ID	Experiment type	Cell Line	Experiment ID Entry	Target TF Expression level (TPM)	Peak Count	Top Motif (CIS-BP ID Version 1.02)	Motif Enrichment (AUROC)	Motif distance to peak summit (bp)	Type of Binding	Qualitative Score
ESR1	1A12	ChIPexo	MCF-7	17413	60	11975	ESR (M6219_1)	0.82	5	Cognate	1
GABPA	2G3	ChIPexo	K562	22213-22800	15	1355	ETS (M5431_1)	0.96	2	Cognate	1
GRHL2	1A6	ChIPexo	MCF-7	17380	53	25199	GRHL (M5498_1)	0.92	2	Cognate	1
HLF	1C5	ChIPexo	HepG2	18309	274	14189	HLF (M5516_1)	0.91	56	Cognate	1
HNF4A	2A8	ChIPexo	HepG2	18755	64	4612	HNF (M5524_1)	0.77	2	Cognate	1
HSF1	1A8	ChIPexo	K562	28402-28665	54	635	HSF (M5567_1)	0.96	2	Cognate	1
HSF1	1A10	ChIPexo	K562	28405	54	1746	HSF (M5567_1)	0.96	2	Cognate	1
HSF1	1A9	ChIPseq	HCT116	GSM4604722	132.39	859	HSF (M5567_1)	0.965802	17.5	Cognate	1
HSF1	1A10	ChIPseq	HCT116	GSM4604716	132.39	4172	HSF (M5567_1)	0.9638	13.5	Cognate	1
HSF1	1A8	ChIPseq	HCT116	GSM4604720	132.39	4451	HSF (M5567_1)	0.961338	12.5	Cognate	1
MEIS2	1A11	ChIPexo	K562	22624	18	2503	MEIS (M0965_1)	0.75	10	Cognate	1
NFIA	2C6	ChIPexo	K562	26151-28308	6	1327	NFI (M5665_1)	0.72	7	Cognate	1
NRF1	3H1	ChIPexo	MCF-7	17377	12	4931	NRF1 (M5688_1)	0.96	3	Cognate	1
NRF1	3D4	ChIPseq	HCT116	GSM4604759	20.215	843	NRF1 (M5688_1)	0.962054	18	Cognate	1
NRF1	3H1	ChIPseq	HCT116	GSM4604762	20.215	2104	NRF1 (M5688_1)	0.928752	32	Cognate	1
STAT5A	1A11	ChIPexo	K562	22200-22790	190	931	STAT (M1955_1)	0.93	1	Cognate	1
TEAD4	1G7	ChIPseq	HCT116	GSM4604814	25.39	196	TEAD (M5904_1)	0.805771	17	Cognate	1
USF1	1B8	ChIPexo	K562	23813-24138	38	12577	USF (M0225_1)	0.98	2	Cognate	1
USF2	1A11	ChIPexo	K562	23850	66	2732	USF (M0225_1)	0.97	2	Cognate	1
YY1	1B2	ChIPexo	MCF-7	17379	67	11845	YY1 (M5954_1)	0.95	2	Cognate	1
ZNF143	1A10	ChIPexo	K562	26150-28307	14	7229	ZNF143 (M4484_1)	0.94	2	Cognate	1
ATAD2	2E5	ChIPexo	K562	23860	33.725	1144	MYB (M5645_1)	0.60476	45	Non-cognate	2
BACH1	1A2	ChIPseq	HCT116	GSM4604674	5.175	1251	bZIP (M0320_1)	0.866876	24.5	Cognate	2
DCP2	1D6	ChIPexo	K562	18366	25.295	1120	YY1 (M5954_1)	0.612564	35	Non-cognate	2
DDIT3	1D10	ChIPexo	K562	17470	82.695	812	RUNX (M5792_1)	0.605138	53.5	Non-cognate	2
ELK1	1D9	ChIPexo	K562	23571	27.465	859	ZNF202 (M0404_1)	0.705204	16.5	Non-cognate	2
FOS	1A7	ChIPseq	HCT116	GSM4604709	616.62	41972	CDX2 (M5313_1)	0.59514	60.5	Non-cognate	2
GATA4	1A7	ChIPexo	HepG2	18745	14.86	5226	FOX (M0729_1)	0.728192	2.5	Non-cognate	2
HMGB1	4F10	ChIPexo	MCF-7	17385	556.715	13260	CTCF (M5331_1)	0.61144	44.5	Non-cognate	2
JAZF1	1C2	ChIPseq	HCT116	GSM4604732	2.28	94731	CDX2 (M5313_1)	0.617142	60.5	Non-cognate	2
KLF16	2E5	ChIPexo	K562	26317-28258	16.695	8195	ZNF143 (M4484_1)	0.658908	3	Non-cognate	2
MEF2D	3A4	ChIPexo	K562	26301	5.465	5004	LHX (M6041_1)	0.746242	33.5	Non-cognate	2
MEN1	2B1	ChIPseq	HCT116	GSM4604753	42.32	3656	ESR2 (M6219_1)	0.61267	39.5	Non-cognate	2
MXD3	2B4	ChIPexo	K562	26467-28240	18.41	639	NRF1 (M5688_1)	0.755248	22.5	Non-cognate	2
NMI	1C1	ChIPexo	K562	18390	28.885	3051	RUNX (M5792_1)	0.603476	42.5	Non-cognate	2
PPARA	2B9	ChIPexo	HepG2	18742	15.18	7513	ETS (M5431_1)	0.635794	39.5	Non-cognate	2
PPP1R10	1G12	ChIPexo	MCF-7	18430	26.635	872	ETS (M5431_1)	0.616744	46.5	Non-cognate	2
PRDM4	2B3	ChIPseq	HCT116	GSM4604774	17.01	884	NFAT (M1518_1)	0.724136	25	Non-cognate	2
PRDM4	2B4	ChIPseq	HCT116	GSM4604775	17.01	197	NFAT (M1518_1)	0.67675	25.5	Non-cognate	2
SIRT2	1A2	ChIPexo	K562	23527-23898	18.48	721	LHX (M6041_1)	0.847686	37.5	Non-cognate	2
SIX5	2H4	ChIPexo	K562	26289	7.12	701	CTCF (M5331_1)	0.88736	5	Non-cognate	2
SMAD2	1B10	ChIPseq	HCT116	GSM4604787	51.44	85083	CPEB1 (M5322_1)	0.612438	61	Non-cognate	2
SMARCC1	1F1	ChIPseq	HCT116	GSM4604802	43.38	6286	NRF1 (M5688_1)	0.884116	31	Non-cognate	2
SMARCC2	1A3	ChIPseq	HCT116	GSM4604803	39.675	5520	bZIP (M0320_1)	0.803578	42.5	Non-cognate	2
STAT3	2F12	ChIPexo	K562	22217-22804	96.995	838	bZIP (M5952_1)	0.881622	3.5	Non-cognate	2
TCEAL8	1C4	ChIPexo	K562	22615	70.94	954	GATA (M0782_1)	0.62213	35.5	Non-cognate	2
TEAD4	2F4	ChIPseq	HCT116	GSM4604815	25.39	183	TEAD (M5904_1)	0.850025	17	Cognate	2
THAP5	2D4	ChIPexo	K562	26459	13.13	1425	LHX (M6041_1)	0.708664	36.5	Non-cognate	2
WHSC1	2A1	ChIPseq	HCT116	GSM4604818	59.61	302	bHLH (M0177_1)	0.820808	51	Non-cognate	2
ZKSCAN1	1F10	ChIPexo	HepG2	18759	48.92	7368	POU (M5739_1)	0.660134	23	Non-cognate	2
ZNF212	1A3	ChIPexo	K562	24051-24396	9.905	7344	PRDM (M5749_1)	0.85299	27	Non-cognate	2
ZNF550	1B4	ChIPexo	K562	23775-24100	3.58	3033	PRDM (M5749_1)	0.857424	24	Non-cognate	2
ZZZ3	1B11	ChIPexo	K562	22179-22777	25.72	3097	MYB (M5645_1)	0.607986	47	Non-cognate	2
