# Supplementary material for: A ChIP-exo screen of 887 Protein Capture Reagents Program transcription factor antibodies in human cells
Source: HighWire-hosted journal article supplement (doi:10.1101/gr.275472.121), 2021-08-23
Supplement: Supplemental_Table_S5.xlsx [file Supplemental_Table_S5.xlsx]

## Sheet: ProjectStats
Supplementary Table 4: CUT&RUN QC
	Project phase	Samples processed		Cellline/Tissue	Samples processed		Sequencing Stats	Read depth	Unique mappability (%)	ChExMix Peaks
	EpiCypher	45		K562	43		Avg	7.66377e+06	0.673901	20986.1
	Total	45		MCF7	2		Median	7262883	0.656299	17254
				Total	45		Std Dev	2.49923e+06	0.120098	17052.7
							Min	3304072	0.468773	355
							Max	15767615	0.970825	95805
		Samples processed					chromHMM	Promoter	Transcription	Enhancer	Insulator	Repressed	Heterochromatin
	Unique Targets	44					Avg	-3.82976	1.65169	-1.88271	0.443105	1.66781	1.311
	Unique Clones	45					Median	-4.62994	2.04427	-2.24619	0.267693	1.99668	1.75482
	Total Samples	45					Std Dev	1.74676	1.0495	1.08856	1.01275	1.22925	1.09786
							Min	-5.46988	-3.12805	-5.86567	-2.13666	-3.83447	-3.33325
		QC Metrics	% Pass Threshold				Max	0.664992	2.3307	1.00736	5.61035	5.18331	1.83614
	Samples >=1	7	0.155556				2 StdDev above Avg	-0.336232	3.75069	0.294407	2.4686	4.12631	3.50671
	Samples >=2	7	0.155556
	Samples >=3	4	0.0888889				segway	Promoter	Promoter Active	Inactive Promoter	Transcription	Enhancer	Open chromatin	Insulator	Heterochromatin	Polycomb
	Avg	0.4					Avg	-3.96879	2.39122	-0.297596	1.20837	-1.76217	0.873279	-1.52244	1.88762	1.81137
	Median	0					Median	-4.66536	3.03861	-0.297596	1.56035	-2.13234	0.873279	-2.07541	2.35922	2.17533
	Std Dev	0.95219					Std Dev	1.76937	1.51731	0.0841103	0.96232	0.78072	0.0404708	1.2832	1.09927	1.30328
	Min	0					Min	-8.30168	-3.30033	-0.381706	-2.54593	-2.38922	0.832808	-2.45259	-1.73682	-4.2704
	Max	3					Max	1.25686	3.14708	-0.213486	2.11652	0.365275	0.91375	4.09995	2.51788	4.56133
							2 StdDev above Avg	-0.430062	5.42584	-0.129375	3.13301	-0.200734	0.95422	1.04397	4.08616	4.41794
										feature pileup	Promoter pileup	Insulator pileup
										Avg	-1.42674	-0.879679
										Median	-1.89684	-1.45667
										Std Dev	1.77709	1.30946
										Min	-5.97093	-1.86009
										Max	4.47627	4.47587
										2 StdDev above Avg	2.12743	1.73924

## Sheet: SampleStats
ProjectPhase	SampleID	Target	AntibodyID	Cellline/Tissue		Raw reads	Aligned reads	Mappability (%)	ChExMix Peaks		QC Metrics		Feature enrichment	Promoter Enrichment	Insulator Enrichment		chromHMM	Promoter	Transcription	Enhancer	Insulator	Repressed	Heterochromatin		segway	Active_Promoter	Proximal_Active	Inactive_Promoter	Transcription	Enhancer	Open_Chromatin	Insulator	Heterochromatin	Polycomb
EpiCypher	BV411	FOXA1	Abcam	MCF7		4092308	3304072	0.807386	4290		3			1.55898	2.58934			-0.498748	0.127599	0.40743	0.734913	0.307771	0.389495			-0.566747	0.321436	-0.213486	0.298015	0.354113	0.832808	0.324851	0.278368	0.535954
EpiCypher	BV623	FOS	1A7	K562		13366228	11661735	0.872478	36004		3			1.72417	1.17527			-0.54077	0.506285	1.00736	2.44221	-1.84972	-1.86835			-0.639388	-1.77705	NaN	-0.17185	0.365275	NaN	1.72385	-1.23419	-2.27775
EpiCypher	BV631	K4me3	EpiCypher	K562		12478160	11712861	0.938669	95805		3			4.47627	1.47265			0.664992	-3.12805	-0.286202	-2.13666	-3.83447	-3.33325			1.25686	-3.30033	NaN	-2.54593	-1.19585	NaN	-1.86527	-1.73682	-4.2704
EpiCypher	BV633	CTCF	Millipore	K562		11768350	11252669	0.956181	80913		3			2.05384	4.47587			-0.753661	0.539124	0.0227147	5.61035	-0.488978	-1.85805			-1.03792	-1.69358	NaN	-0.680688	-0.394761	NaN	4.09995	-1.20977	-0.415563
EpiCypher	BV410	FOXA1	Bethyl	MCF7		5084426	4267045	0.839238	2087		2			0.675235	1.79956			-1.01186	0.698399	0.144975	-0.25131	0.651338	0.761294			-1.06907	0.717694	-0.381706	0.893139	0.175942	0.91375	-0.417127	0.364411	1.05977
EpiCypher	BV609	USF2	1A11	K562		12490904	10664998	0.853821	19808		2			1.5282	0.2195			-0.401642	0.43088	0.579871	1.38723	0.587444	-0.386822			-0.660764	0.533617	NaN	-0.345379	0.219256	NaN	0.534424	-0.105942	0.288546
EpiCypher	BV632	K27me3	EpiCypher	K562		13276236	12888898	0.970825	53763		2			-5.97093	-1.39701			-4.62994	-1.9943	-5.86567	0.333483	5.18331	0.0871686			-8.30168	-1.04645	NaN	-2.39859	-2.07824	NaN	-1.06003	-0.206301	4.56133
EpiCypher	BV590	MEN1	1H6	K562		10870434	6036572	0.55532	13283		0			0.872027	-0.705467			-0.682947	1.41673	-1.5361	-0.448689	1.26059	1.20298			-0.694324	2.50001	NaN	0.931723	-1.15916	NaN	-2.27507	1.87497	1.44626
EpiCypher	BV591	STAT1	3D6	K562		12061086	8280978	0.686586	22783		0			-2.6419	-1.71003			-5.11437	2.09718	-2.2827	0.267693	2.14758	1.75743			-5.07143	3.0481	NaN	1.58782	-2.20953	NaN	-2.07541	2.36433	2.32922
EpiCypher	BV592	HOXB5	1C3	K562		12373386	8829246	0.713567	23868		0			-2.67656	-1.70119			-5.05949	2.10139	-2.24265	0.420383	2.15004	1.74946			-5.00494	3.02776	NaN	1.64882	-2.15839	NaN	-1.86865	2.29756	2.35676
EpiCypher	BV593	HOXB9	1E6	K562		12577624	7866484	0.625435	17902		0			-1.14312	-0.492689			-3.89854	2.01177	-2.0994	0.111517	1.91885	1.75551			-4.16907	3.05217	NaN	1.51492	-2.03122	NaN	-1.89248	2.41958	2.099
EpiCypher	BV594	HOXB2	1C9	K562		10765476	6540375	0.607532	16188		0			-2.9627	-1.82506			-5.46988	2.05559	-2.43063	0.0163262	1.89064	1.82119			-5.23766	3.13765	NaN	1.51449	-2.38765	NaN	-2.3748	2.51584	2.10067
EpiCypher	BV595	FOXP3	1B2	K562		12314942	6059696	0.49206	16156		0			-2.67806	-1.69543			-5.2021	2.05188	-2.42433	0.284703	1.97158	1.80467			-4.92528	3.09882	NaN	1.57839	-2.31201	NaN	-2.14791	2.4595	2.16193
EpiCypher	BV596	FOXO3	1G5	K562		10660354	6258018	0.587037	15133		0			-2.79514	-1.71094			-5.37434	2.05244	-2.42471	0.033893	1.99666	1.80741			-5.30281	3.11037	NaN	1.53891	-2.32856	NaN	-2.34049	2.49166	2.15867
EpiCypher	BV598	FOXA2	3A2	K562		21769802	15767615	0.724288	36841		0			-2.46906	-1.59998			-5.04594	2.14026	-2.22908	0.398694	2.15322	1.73684			-5.02954	3.02079	NaN	1.65127	-2.12484	NaN	-2.05064	2.3026	2.35301
EpiCypher	BV600	KLF7	1C11	K562		7007306	3811999	0.544004	9220		0			-1.83395	-1.28714			-4.85471	2.04286	-2.22427	0.294197	1.98823	1.78193			-4.92529	3.08219	NaN	1.56919	-2.17241	NaN	-2.17491	2.42269	2.15968
EpiCypher	BV601	KLF16	2E5	K562		10329346	6960910	0.673896	18482		0			-2.47362	-1.7335			-5.26894	2.07908	-2.34494	0.200953	2.00204	1.79026			-5.1165	3.09789	NaN	1.59484	-2.28366	NaN	-2.24757	2.42698	2.18426
EpiCypher	BV602	KLF14	1C12	K562		10933064	7991035	0.730905	15696		0			-2.15312	-1.16392			-4.86873	2.15108	-2.17064	0.316189	2.09885	1.7331			-4.8356	3.01327	NaN	1.71195	-2.11302	NaN	-2.04662	2.29378	2.31883
EpiCypher	BV603	KLF1	2C4	K562		11303998	8867271	0.784437	10241		0			-0.426942	-0.277729			-2.25457	1.84945	-1.51421	0.420422	1.80353	1.57667			-2.70906	2.87442	NaN	1.36293	-1.41106	NaN	-1.1544	2.17311	1.94603
EpiCypher	BV604	ZNF354B	1A8	K562		9328488	4602037	0.493332	11476		0			-2.24231	-1.34688			-4.93287	2.10006	-2.24619	0.212193	2.02232	1.76701			-4.6637	3.02954	NaN	1.66188	-2.18932	NaN	-2.14033	2.42359	2.23246
EpiCypher	BV605	ZNF143	1A10	K562		9929316	6503230	0.654952	17254		0			-1.89684	-1.46659			-4.1989	2.05402	-2.25709	0.346917	2.02937	1.75482			-4.36509	3.04448	NaN	1.56627	-2.10695	NaN	-2.08659	2.34921	2.24617
EpiCypher	BV607	YY2	1A8	K562		8172358	5167253	0.632284	13380		0			-2.78429	-1.85559			-5.39983	2.0349	-2.36251	0.0279104	1.97333	1.81076			-5.23945	3.11435	NaN	1.55304	-2.29569	NaN	-2.21044	2.45011	2.15392
EpiCypher	BV608	YY1	1A5	K562		8783522	5971910	0.679899	14862		0			-1.55816	-1.45667			-4.62156	2.08373	-2.25051	0.221735	2.06155	1.75829			-4.66407	3.04157	NaN	1.63315	-2.17459	NaN	-2.12006	2.37185	2.26126
EpiCypher	BV610	THAP7	3H4	K562		12644214	7933949	0.627477	16547		0			-2.33673	-1.72827			-5.01053	2.06495	-2.32939	0.295217	2.0179	1.78444			-4.81456	3.07678	NaN	1.56922	-2.24881	NaN	-2.1768	2.42873	2.21524
EpiCypher	BV611	THAP5	2D4	K562		6716748	3533851	0.526125	9042		0			-1.33746	-1.34044			-4.234	2.02125	-2.27595	0.185295	1.88328	1.78609			-4.66536	3.07789	NaN	1.53511	-2.13234	NaN	-2.45259	2.46177	2.11129
EpiCypher	BV612	THAP4	1A7	K562		11087402	6090182	0.549288	15829		0			-2.43122	-1.5713			-5.00812	2.10833	-2.32783	0.280757	2.06961	1.76603			-4.78001	3.05831	NaN	1.65996	-2.24505	NaN	-2.15819	2.35922	2.26733
EpiCypher	BV613	STAT5A	1A11	K562		10732206	6703688	0.624633	16420		0			-2.60375	-1.5533			-5.2034	2.03862	-2.32401	0.182388	2.0462	1.79271			-5.01374	3.0764	NaN	1.57436	-2.27844	NaN	-2.12874	2.44558	2.22649
EpiCypher	BV614	STAT3	2F12	K562		11824450	8485439	0.717618	24376		0			0.433001	-0.757125			-1.51826	1.76559	-1.42879	0.106944	1.7581	1.4179			-2.03146	2.68745	NaN	1.29377	-1.14674	NaN	-1.90655	2.06108	1.9286
EpiCypher	BV615	NRF1	3H1	K562		11451468	6839931	0.597297	18277		0			-2.48567	-1.62102			-5.22256	2.08763	-2.36181	0.302005	2.00812	1.7864			-4.98604	3.08008	NaN	1.59795	-2.2843	NaN	-2.02887	2.41961	2.22598
EpiCypher	BV616	NFIA	1B8	K562		12812864	8372408	0.653438	23652		0			-2.73669	-1.85596			-5.25691	2.10193	-2.32318	0.284358	2.06891	1.77267			-5.12894	3.05128	NaN	1.61924	-2.24113	NaN	-2.05142	2.40516	2.28467
EpiCypher	BV617	NAB2	2G1	K562		7489392	5310913	0.709125	8175		0			-1.8939	-1.86009			-5.06714	1.97944	-2.40063	0.0873595	1.83438	1.83614			-4.92131	3.14708	NaN	1.44834	-2.35743	NaN	-2.32724	2.51788	2.0719
EpiCypher	BV618	MLLT3	2B6	K562		11845264	8215703	0.693585	21881		0			-2.52838	-1.56679			-5.06729	2.12723	-2.23031	0.390089	2.1116	1.74711			-4.9269	3.02447	NaN	1.62517	-2.12493	NaN	-2.05599	2.32108	2.33903
EpiCypher	BV619	MEIS2	1A11	K562		13104948	8837929	0.674396	22928		0			-2.74777	-1.71344			-5.28045	2.072	-2.37883	0.226167	2.02309	1.79196			-5.13443	3.08704	NaN	1.57268	-2.30236	NaN	-2.25196	2.43413	2.23622
EpiCypher	BV620	MEF2D	3A4	K562		11937184	7262883	0.608425	19062		0			0.163535	-0.978095			-1.90657	1.81625	-1.34469	0.177648	1.7273	1.49922			-3.19969	2.78289	NaN	1.33499	-1.09392	NaN	-1.78607	2.1411	1.93191
EpiCypher	BV622	GABPA	2G3	K562		14747718	9108937	0.617651	24623		0			-1.66133	-1.61413			-3.92999	2.07192	-2.29213	0.316965	1.99668	1.74549			-4.03661	3.03861	NaN	1.59041	-2.14258	NaN	-2.12436	2.374	2.2137
EpiCypher	BV624	FEZF2	1A7	K562		11274286	7103975	0.630104	17150		0			-1.8833	-1.52453			-4.47369	2.04427	-2.27226	0.258704	1.99782	1.77375			-4.6568	3.07443	NaN	1.53094	-2.17038	NaN	-2.16226	2.4334	2.17533
EpiCypher	BV627	BATF2	2B9	K562		12722372	9550420	0.750679	20533		0			-1.53571	-0.0844513			-3.92682	2.04033	-2.10427	2.06074	2.03822	1.68783			-4.43567	2.94534	NaN	1.52673	-1.95985	NaN	0.617333	2.23667	2.26954
EpiCypher	BV628	USF1	1B8	K562		12568658	5891844	0.468773	13245		0			-0.786882	-1.20908			-3.04986	2.00405	-1.74709	0.372654	1.93601	1.65522			-3.45975	2.91392	NaN	1.6068	-1.68313	NaN	-1.94356	2.2654	2.14599
EpiCypher	BV589	MAX	1E7	K562		12315356	6708681	0.544741	18167		0			-2.65444	-1.74364			-5.04615	2.08254	-2.30881	0.208984	2.02825	1.77866			-4.84742	3.06366	NaN	1.63302	-2.28064	NaN	-2.11682	2.42816	2.22987
EpiCypher	BV597	FOXM1	1H4	K562		9844996	5669644	0.575891	13393		0			-2.40002	-1.60253			-5.39427	2.03709	-2.43776	0.196636	1.90352	1.82182			-5.1421	3.13262	NaN	1.55976	-2.38922	NaN	-2.21262	2.51209	2.07892
EpiCypher	BV599	BCL11A	1G10	K562		12426926	8425716	0.678021	355		0			-1.94898	-0.557081			-4.01431	1.9699	-2.01193	0.287093	2.01363	1.7497			-3.71292	2.72086	NaN	1.75367	-1.33104	NaN	-0.76319	2.0709	2.23692
EpiCypher	BV606	ZFAT	2D2	K562		10614242	5734944	0.540307	13886		0			-2.47635	-1.67005			-5.13488	2.05993	-2.36061	0.228773	2.03136	1.78989			-4.90842	3.06877	NaN	1.56035	-2.26017	NaN	-2.14379	2.44582	2.23847
EpiCypher	BV621	MAFG	1H7	K562		12824292	9727897	0.758552	18047		0			-0.247597	-0.621903			-2.34726	2.3307	-0.693866	0.161446	1.57944	1.26923			-2.89551	2.53522	NaN	2.11652	-0.994661	NaN	-0.856808	1.83846	1.77216
EpiCypher	BV625	DRAP1	1A12	K562		13405454	9370363	0.698996	24092		0			-1.58381	0.237516			-3.90692	2.05397	-1.96763	1.87738	2.05998	1.67391			-4.3775	2.9529	NaN	1.54963	-1.95885	NaN	0.533784	2.24408	2.24028
EpiCypher	BV626	DCP2	1D6	K562		13291558	8723239	0.656299	19258		0			-0.701836	-0.95626			-2.92027	1.94565	-1.77074	0.206893	1.89278	1.6688			-3.54801	2.9603	NaN	1.44982	-1.65956	NaN	-2.14733	2.31156	2.08197
