# Supplementary material for: A ChIP-exo screen of 887 Protein Capture Reagents Program transcription factor antibodies in human cells
Source: HighWire-hosted journal article supplement (doi:10.1101/gr.275472.121), 2021-08-23
Supplement: Supplemental_Table_S6.xlsx [file Supplemental_Table_S6.xlsx]

## Sheet: SuppTable5
Supplementary Table 5: Supernatants concentrated and then examined by STORM
Target	CloneID	Notes
BRD1	2H2
BRPF1	2E11
FOSB	1C9
GLI1	1E6
GRHL1	1B6
GTF2H2C	2C9
HOXB2	1F2
KLF14	1H1
KLF16	2E5
LCORL	1H11
LHX2	2D12
MDX4	2B6
MED4	1A6
MEF2D	3A4
MEN1	1H6
MLXIP	1A10
NAB2	2G1
NFIA	2C6
NPM3	1D5	single replicate only
NRF1	4A3	single replicate only
NFYC	1A11
PBX1	3C8
PRDM16	1B9
PRRX2	1G11
RXRG	5G6
SIRT2	1A2
SMAD2	1B10
STAT5A	1A11
TCEAL8	1C4
TFCP2	3B1
THAP5	2D4
THAP9	2B3
USF1	1B8
USP13	2H7
ZBTB14	1B12
ZFAT	2D2
ZNF354B	1A8
ZNF543	1A8
ZNF581	1A12
ZCCHC7	1B4	discontinued from DSHB
ZNF2	1D2	discontinued from DSHB
DIS3	1A7	staining failed
