# Supplementary material for: A ChIP-exo screen of 887 Protein Capture Reagents Program transcription factor antibodies in human cells
Source: HighWire-hosted journal article supplement (doi:10.1101/gr.275472.121), 2021-08-23
Supplement: Supplemental_Table_S7.xlsx [file Supplemental_Table_S7.xlsx]

## Sheet: SuppTable6
Supplementary Table 6: PBM experiment conditions.
Each protein was conducted with anti-GST Alexa 488 and their respected PCRP antibodies for PBM. "Experiment" indicates the date and array number. "Concentration (nM)" is the final TF concentration used in the PBM experiment. Zinc acetate (ZnAc) was added to the buffers for zinc finger TFs.
TF	Expression Kit	antibody	Dilution	PBM experiment	TF concentration (nM)	binding buffer
CEBPB	1-Step Human Coupled IVT	anti-GST	1:40 dilution	180508_v14_225_1	200	PBS
CEBPB	1-Step Human Coupled IVT	2A12	1:20 dilution	180518_v14_255_1	300	PBS
CEBPB	1-Step Human Coupled IVT	3D10	1:20 dilution	180518_v14_255_1	300	PBS
ESR1	PURExpress	anti-GST	1:40 dilution	200115_v14_289_1	400	PBS+ZnAc
ESR1	PURExpress	1A12	undiluted	200317_v14_291_1	400	PBS+ZnAc
FOXA3	1-Step Human Coupled IVT	anti-GST	1:40 dilution	180508_v14_225_1	500	PBS
FOXA3	1-Step Human Coupled IVT	2A9	undiluted	180517_v14_254_1	600	PBS
FOXI1	1-Step Human Coupled IVT	anti-GST	1:40 dilution	180906_v14_265_3	200	PBS
FOXI1	1-Step Human Coupled IVT	1F8	1:20 dilution	180518_v14_255_1	800	PBS
FOXI1	1-Step Human Coupled IVT	1G11	1:20 dilution	180518_v14_255_1	800	PBS
FOXM1	1-Step Human Coupled IVT	anti-GST	1:40 dilution	190108_v14_272_1	200	PBS
FOXM1	1-Step Human Coupled IVT	2E6	undiluted	190415_v14_273_1	200	PBS
FOXM1	1-Step Human Coupled IVT	1H4	undiluted	190415_v14_273_1	200	PBS
FOXN1	1-Step Human Coupled IVT	anti-GST	1:40 dilution	181024_v14_268_2	500	PBS
FOXN1	1-Step Human Coupled IVT	2B8	undiluted	180621_v14_258_1	500	PBS
FOXR1	1-Step Human Coupled IVT	anti-GST	1:40 dilution	Not available	Not available	Not available
FOXR1	1-Step Human Coupled IVT	1F8	undiluted	180517_v14_254_1	600	PBS
GATA4	1-Step Human Coupled IVT	anti-GST	1:40 dilution	181019_v14_269_2	200	PBS+ZnAC
GATA4	1-Step Human Coupled IVT	1A7	undiluted	181024_v14_268_2	200	PBS+ZnAc
HESX1	1-Step Human Coupled IVT	anti-GST	1:40 dilution	180820_v14_271_1	200	PBS
HESX1	1-Step Human Coupled IVT	1A11	undiluted	180621_v14_258_1	200	PBS
HNF4A	PURExpress	anti-GST	1:40 dilution	200115_v14_289_1	400	PBS+ZnAc
HNF4A	PURExpress	2A8	undiluted	200318_v14_295_1	400	PBS+ZnAc
KLF1	1-Step Human Coupled IVT	anti-GST	1:40 dilution	181019_v14_269_2	200	PBS+ZnAc
KLF1	1-Step Human Coupled IVT	2C4	undiluted	181112_v14_262_1	200	PBS+ZnAc
NKX2-5	1-Step Human Coupled IVT	anti-GST	1:40 dilution	180906_v14_265_3	200	PBS
NKX2-5	1-Step Human Coupled IVT	1E6	undiluted	180621_v14_258_1	200	PBS
NKX2-5	1-Step Human Coupled IVT	3F2	undiluted	180621_v14_258_1	200	PBS
NKX2-5	1-Step Human Coupled IVT	3B4	undiluted	180621_v14_258_1	200	PBS
NRF1	PURExpress	anti-GST	1:40 dilution	190923_v14_278_1	300	PBS
NRF1	PURExpress	3H1	undiluted	200317_v14_291_1	300	PBS
NRF1	PURExpress	3D4	undiluted	200317_v14_291_1	300	PBS
PAX3	1-Step Human Coupled IVT	anti-GST	1:40 dilution	180924_v14_265_4	200	PBS
PAX3	1-Step Human Coupled IVT	1B3	undiluted	181017_v14_264_2	200	PBS
POU5F1	1-Step Human Coupled IVT	anti-GST	1:40 dilution	180504_v14_252_1	200	PBS
POU5F1	1-Step Human Coupled IVT	anti-GST	1:40 dilution	190925_v14_277_1	300	PBS
POU5F1	1-Step Human Coupled IVT	1A4	undiluted	180511_v14_253_1	300	PBS
POU5F1	1-Step Human Coupled IVT	1A4	1:5 dilution	180511_v14_253_1	300	PBS
POU5F1	1-Step Human Coupled IVT	1A4	1:20 dilution	180511_v14_253_1	300	PBS
POU5F1	1-Step Human Coupled IVT	1D2	undiluted	180511_v14_253_1	300	PBS
POU5F1	1-Step Human Coupled IVT	1D2	1:5 dilution	180511_v14_253_1	300	PBS
POU5F1	1-Step Human Coupled IVT	1D2	1:20 dilution	180511_v14_253_1	300	PBS
POU5F1	1-Step Human Coupled IVT	1D9	undiluted	180621_v14_258_1	300	PBS
RUNX2	1-Step Human Coupled IVT	anti-GST	1:40 dilution	180712_v14_261_1	200	PBS
RUNX2	1-Step Human Coupled IVT	anti-GST	1:40 dilution	180508_v14_225_1	200	PBS
RUNX2	1-Step Human Coupled IVT	1B7	undiluted	180511_v14_253_1	300	PBS
RUNX2	1-Step Human Coupled IVT	1B7	1:20 dilution	180511_v14_253_1	300	PBS
RUNX2	1-Step Human Coupled IVT	1B7	1:5 dilution	180511_v14_253_1	300	PBS
RUNX2	1-Step Human Coupled IVT	1B9	1:20 dilution	180518_v14_255_1	300	PBS
SOX2	1-Step Human Coupled IVT	anti-GST	1:40 dilution	180508_v14_225_1	200	PBS
SOX2	1-Step Human Coupled IVT	anti-GST	1:40 dilution	181024_v14_268_2	200	PBS
SOX2	1-Step Human Coupled IVT	1B3	undiluted	180511_v14_253_1	300	PBS
SOX2	1-Step Human Coupled IVT	1B3	1:20 dilution	180511_v14_253_1	300	PBS
SOX2	1-Step Human Coupled IVT	1B3	1:5 dilution	180511_v14_253_1	300	PBS
USF1	PURExpress	anti-GST	1:40 dilution	190925_v14_277_1	300	PBS
USF1	PURExpress	1B8	undiluted	200317_v14_291_1	300	PBS
VENTX	1-Step Human Coupled IVT	anti-GST	1:40 dilution	180508_v14_225_1	200	PBS
VENTX	1-Step Human Coupled IVT	2A9	undiluted	180517_v14_254_1	300	PBS
YY1	PURExpress	anti-GST	1:40 dilution	191105_v14_281_1	340	PBS+ZnAc
YY1	PURExpress	1B2	undiluted	200317_v14_291_1	340	PBS+ZnAc
ZNF143	PURExpress	anti-GST	1:40 dilution	191204_v14_282_2	200	PBS+ZnAc
ZNF143	PURExpress	1A10	undiluted	200318_v14_295_1	200	PBS+ZnAc
ZNF200	1-Step Human Coupled IVT	anti-GST	1:40 dilution	181019_v14_269_2	200	PBS+ZnAC
ZNF200	1-Step Human Coupled IVT	1A3	undiluted	180621_v14_258_1	300	PBS+ZnAc
