# Supplementary material for: A ChIP-exo screen of 887 Protein Capture Reagents Program transcription factor antibodies in human cells
Source: HighWire-hosted journal article supplement (doi:10.1101/gr.275472.121), 2021-08-23
Supplement: Supplemental_Table_S9.xlsx [file Supplemental_Table_S9.xlsx]

## Sheet: Sheet1
Supplementary Table 8: For each transcription factor, the protein concentrations were determined by standard curve from anti-GST western. The protein concentrations were used to calculate the amount of protein loaded for the PCRP western.
Transcription Factor	PCRP antibody	First_Protein loaded(ng)	First_Antibody Concentration	First Western	Duplicate_Protein loaded(ng)	Duplicate_Antibody Concentration	Duplicate Western	PBM_Status
CEBPB	2A12	1070	40 ng/mL	Successful	1070	40 ng/mL	independently validated by PBM (gave anticipated motif)	Correct motif
CEBPB	3D10	1070	40 ng/mL	Successful	1070	40 ng/mL	independently validated by PBM (gave anticipated motif)	Correct motif
ESR1	1A12	887	40 ng/mL	Successful	887	40 ng/mL	independently validated by PBM (gave anticipated motif)	Correct motif
FOXA3	2A9	722	40 ng/mL	Failed (band not at the anticipated size)	722	40 ng/mL	Not duplicated(antibody failed PBM)	Not correct motif
FOXI1	1F8	533	40 ng/mL	Failed(no band was detected)	533	40 ng/mL	Not duplicated(antibody failed PBM)	Not correct motif
FOXI1	1G11	859	40 ng/mL	Successful	859	40 ng/mL	Successful	Not correct motif
FOXM1	2E6	940	40 ng/mL	Successful	2500	40 ng/mL	Successful	Not correct motif
FOXM1	1H4	940	40 ng/mL	Successful	2500	40 ng/mL	Successful	Not correct motif
FOXN1	2B8	271	40 ng/mL	Successful	2500	40 ng/mL	Successful	Not correct motif
FOXR1	1F8	686	40 ng/mL	Successful	686	40 ng/mL	independently validated by PBM (gave anticipated motif)	Correct motif
GATA4	1A7	219	40 ng/mL	Failed (band not at the anticipated size)	285	1000 ng/mL	Failed(no band was detected)	Correct motif
HESX1	1A11	329	40 ng/mL	Successful	329	40 ng/mL	independently validated by PBM (gave anticipated motif)	Correct motif
HNF4A	2A8	1330	40 ng/mL	Failed(no band was detected)	1330	1000 ng/mL	Successful	Correct motif
KLF1	2C4	474	40 ng/mL	Failed(no band was detected)	474	40 ng/mL	Not duplicated(antibody failed PBM)	Not correct motif
PAX3	1B3	361	40 ng/mL	Failed (band not at the anticipated size)	361	1000ng/mL	Failed(no band was detected)	Correct motif
FOXL1	2B4	1010	40 ng/mL	Successful	1010	40 ng/mL	Successful	Not correct motif
SOX2	1B3	1150	40 ng/mL	Failed (band not at the anticipated size)	1150	40 ng/mL	Not duplicated(antibody failed PBM)	Not correct motif
SPIC	1F10	1180	40 ng/mL	Uninterpretable	1180	40 ng/mL	Not duplicated(antibody failed PBM)	Not correct motif
SPIC	2C11	1180	40 ng/mL	Uninterpretable	1180	40 ng/mL	Not duplicated(antibody failed PBM)	Not correct motif
EBF1	1B10	315	40 ng/mL	Failed (band not at the anticipated size)	315	40 ng/mL	Not duplicated(antibody failed PBM)	Not correct motif
SMAD3	1A2	450	40 ng/mL	Failed(no band was detected)	450	40 ng/mL	Not duplicated(antibody failed PBM)	Not correct motif
PBX4	1C11	1220	40 ng/mL	Successful	428	40 ng/mL	Successful	Not correct motif
PBX1	2D10	474	40 ng/mL	Successful	683	40 ng/mL	Successful	Not correct motif
NKX2-5	1E6	533	40 ng/mL	Successful	533	40 ng/mL	independently validated by PBM (gave anticipated motif)	Correct motif
NKX2-5	3F2	533	40 ng/mL	Successful	754	40 ng/mL	Successful	Not correct motif
NKX2-5	3B4	533	40 ng/mL	Successful	754	40 ng/mL	Successful	Not correct motif
NRF1	3H1	859	40 ng/mL	Successful	859	40 ng/mL	independently validated by PBM (gave anticipated motif)	Correct motif
NRF1	3D4	859	40 ng/mL	Successful	859	40 ng/mL	independently validated by PBM (gave anticipated motif)	Correct motif
POU5F1	1A4	399	40 ng/mL	Successful	399	40 ng/mL	independently validated by PBM (gave anticipated motif)	Correct motif
POU5F1	1D2	399	40 ng/mL	Successful	399	40 ng/mL	independently validated by PBM (gave anticipated motif)	Correct motif
POU5F1	1D9	399	40 ng/mL	Successful	399	40 ng/mL	Successful	Not correct motif
RUNX2	1B7	841	40 ng/mL	Successful	841	40 ng/mL	independently validated by PBM (gave anticipated motif)	Correct motif
RUNX2	1B9	841	40 ng/mL	Successful	841	40 ng/mL	independently validated by PBM (gave anticipated motif)	Correct motif
USF1	1B8	893	40 ng/mL	Successful	893	40 ng/mL	independently validated by PBM (gave anticipated motif)	Correct motif
VENTX	2A9	452	40 ng/mL	Successful	452	40 ng/mL	independently validated by PBM (gave anticipated motif)	Correct motif
YY1	1B2	418	40 ng/mL	Successful	418	40 ng/mL	independently validated by PBM (gave anticipated motif)	Correct motif
ZNF143	1A10	222	40 ng/mL	Successful	222	40 ng/mL	independently validated by PBM (gave anticipated motif)	Correct motif
ZNF200	1A3	219	40 ng/mL	Successful	219	40 ng/mL	independently validated by PBM (gave anticipated motif)	Correct motif
SMAD2	1B10	208	40 ng/mL	Successful	351	40 ng/mL	Successful	Not correct motif
SMAD2	1C12	208	40 ng/mL	Failed(no band was detected)	208	40 ng/mL	Not duplicated(antibody failed PBM)	Not correct motif
MYCN	1A9	779	40 ng/mL	Successful	779	40 ng/mL	Successful	Not correct motif
MYCN	2C7	779	40 ng/mL	Successful	779	40 ng/mL	Successful	Not correct motif
MYCL1	1A3	722	40 ng/mL	Successful	672	40 ng/mL	Successful	Not correct motif
MYCL1	2D5	722	40 ng/mL	Successful	672	40 ng/mL	Successful	Not correct motif
